# Supplementary material for: Recurrent tumor-specific regulation of alternative polyadenylation of cancer-related genes
Source: Springer Nature journal article supplement (doi:10.1186/s12864-018-4903-7), 2018-07-13
Supplement: MOESM3 [file 12864_2018_4903_MOESM3_ESM-1.pdf]

# AKT2, BRCA

**N: 114**  
**T: 1139**

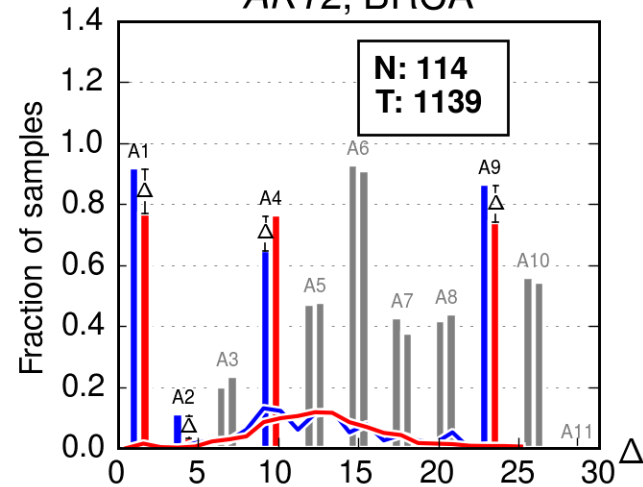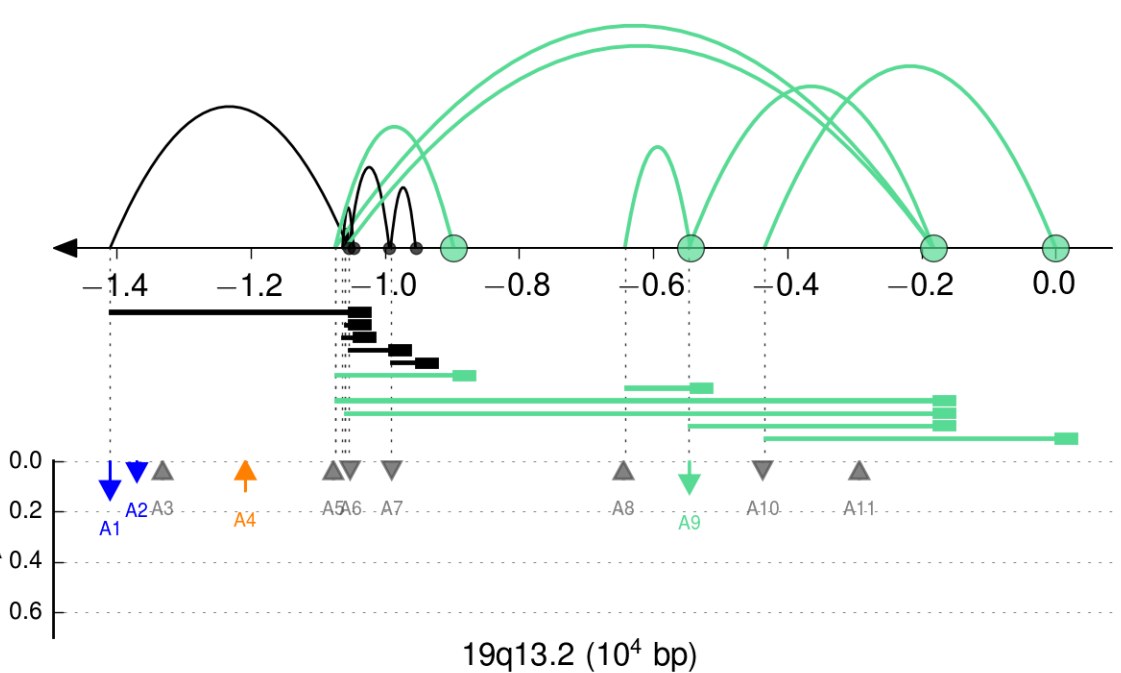

# AKT2, COAD

**N: 41**  
**T: 311**

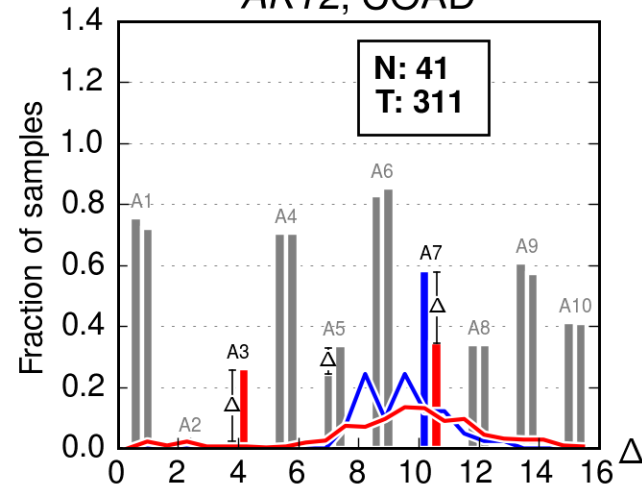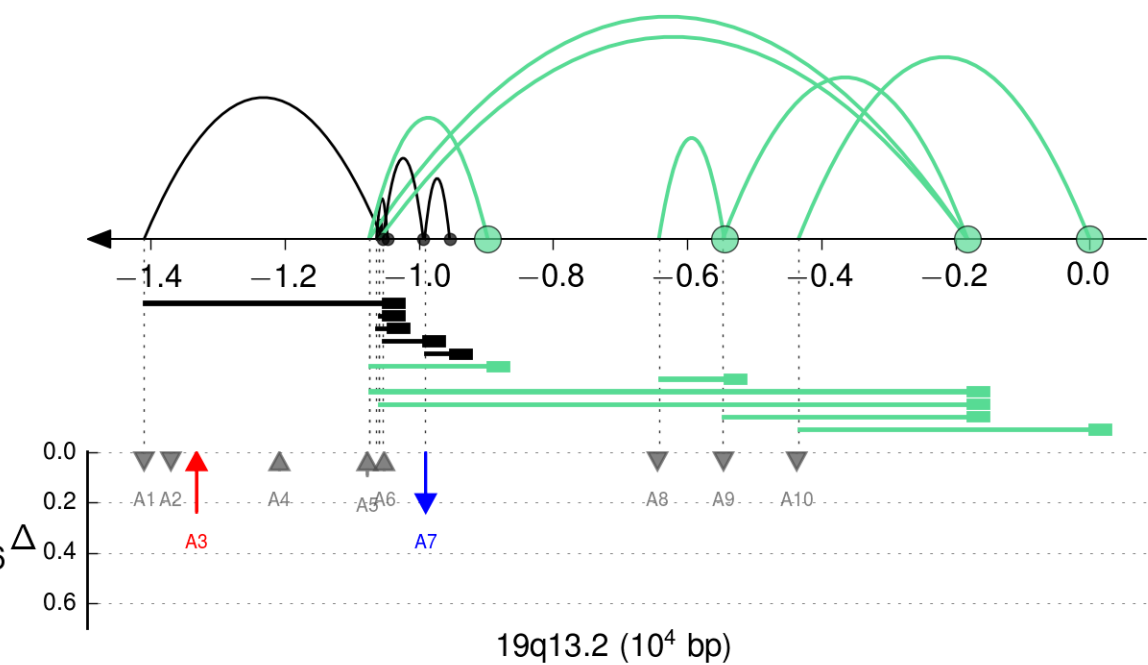

# AKT2, KIRP

**N: 32**  
**T: 290**

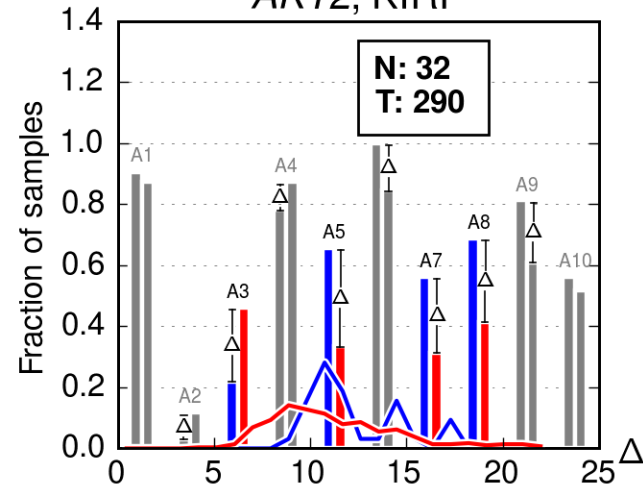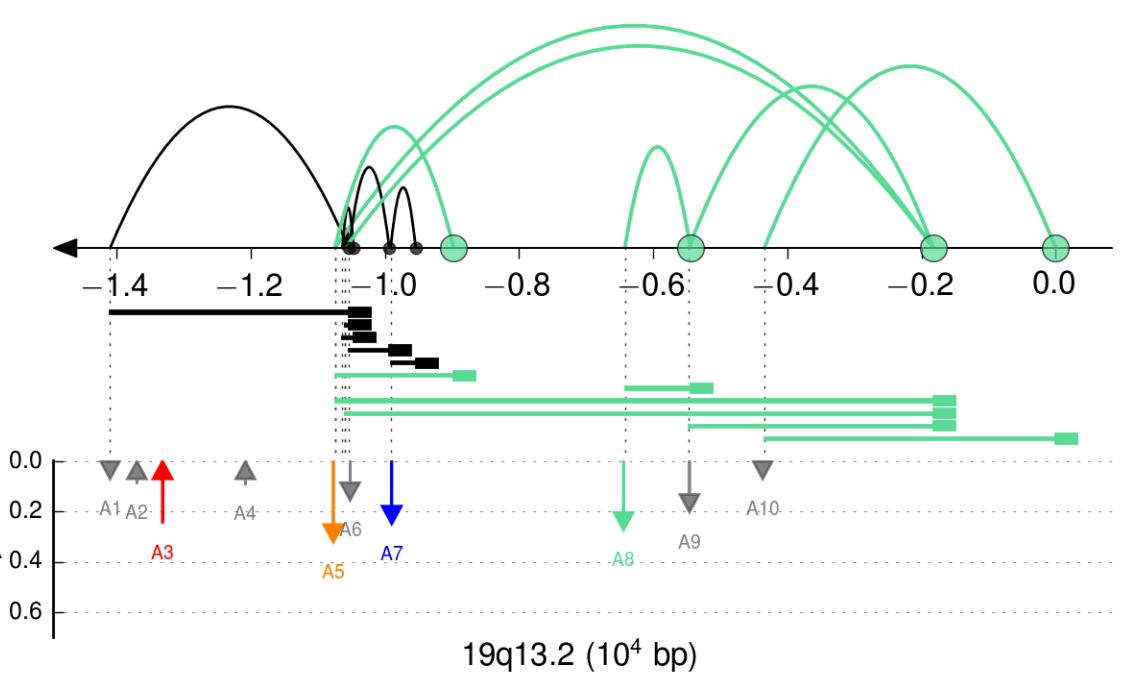

# ALK, THCA

N: 45  
T: 414

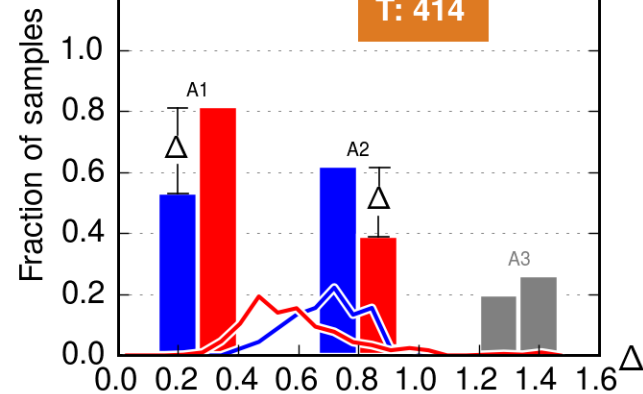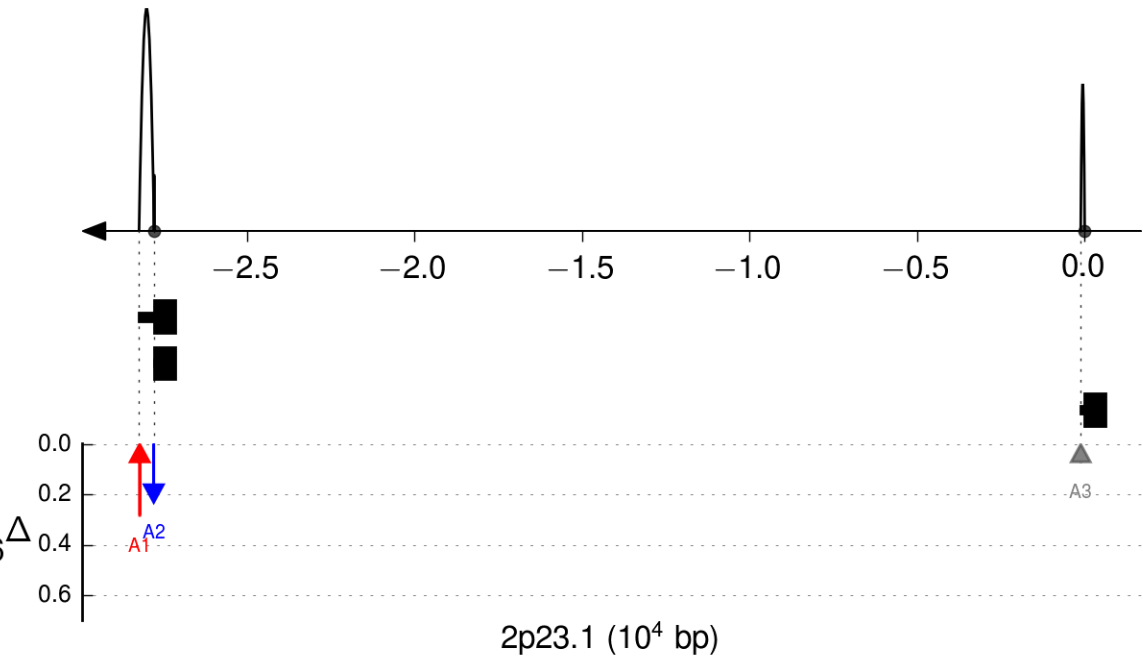

# AMER1, LUAD

N: 52  
T: 496

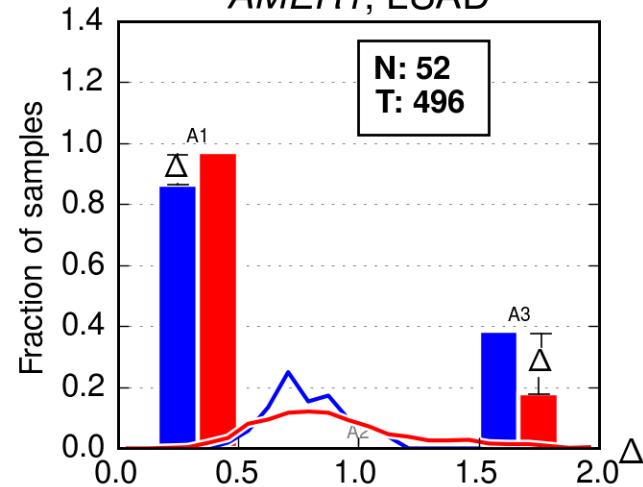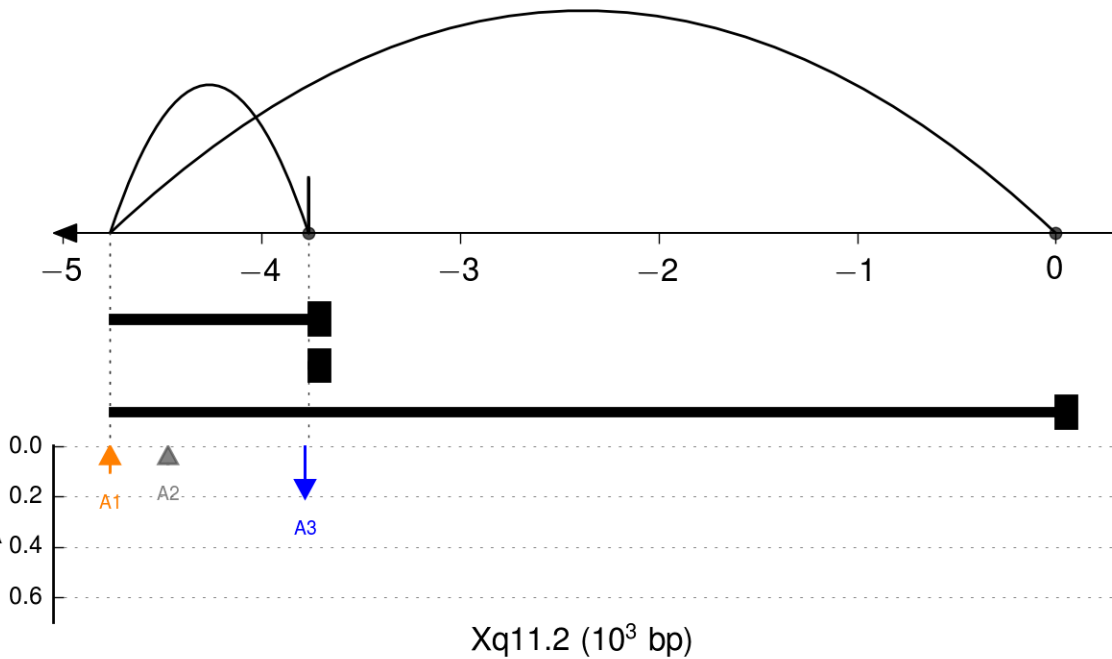

# APC, COAD

N: 39  
T: 289

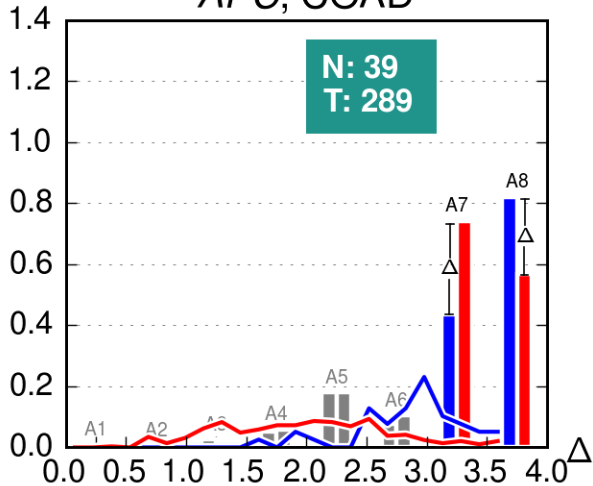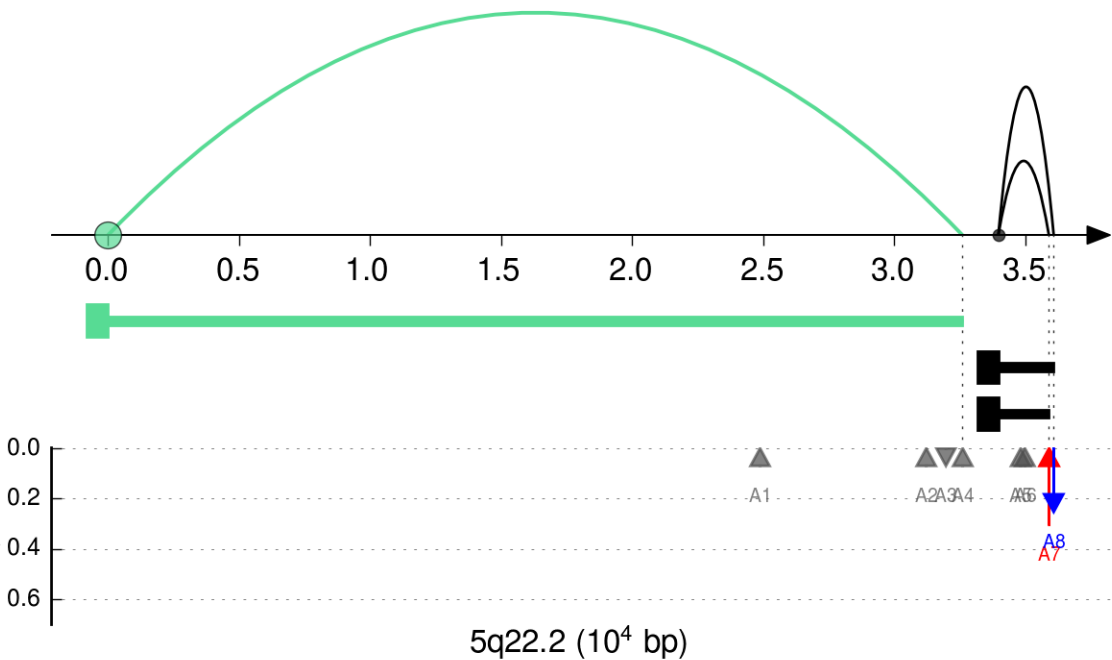

# ATM, HNSC

**N: 36**  
**T: 457**

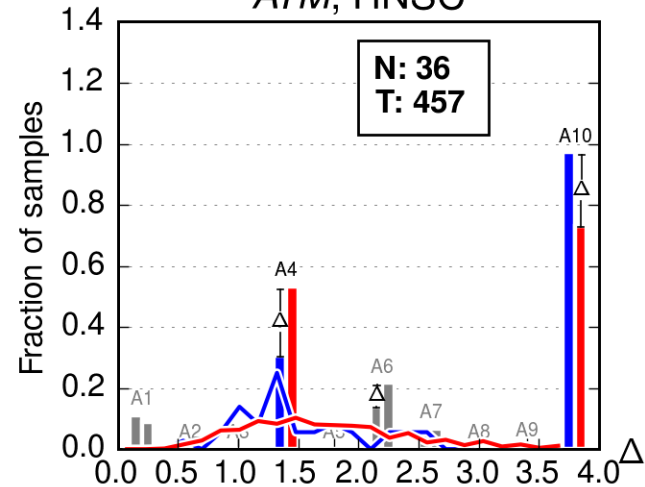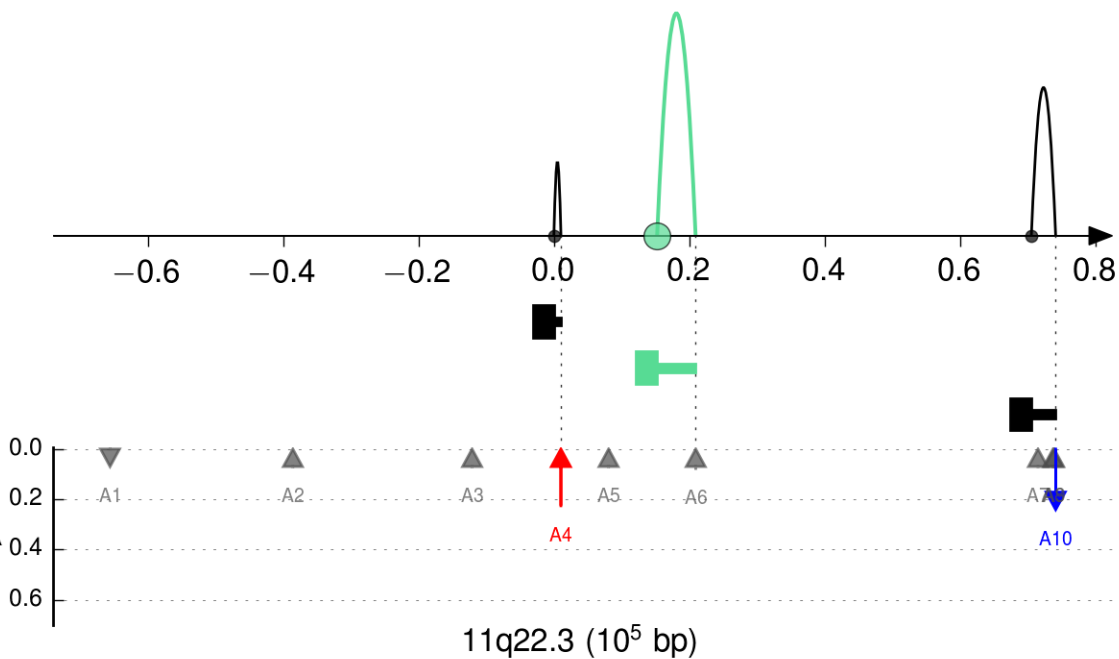

# BRCA1, BLCA

N: 19  
T: 414

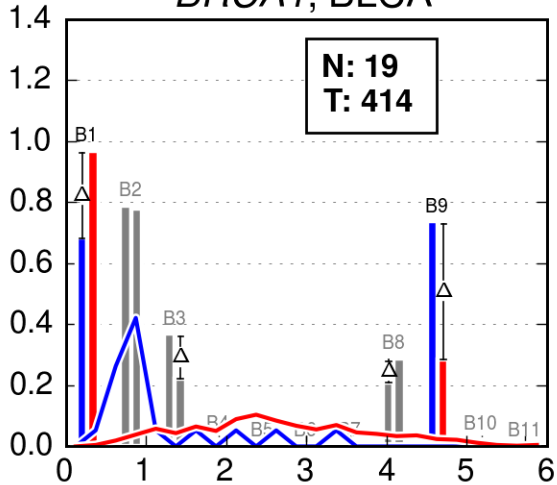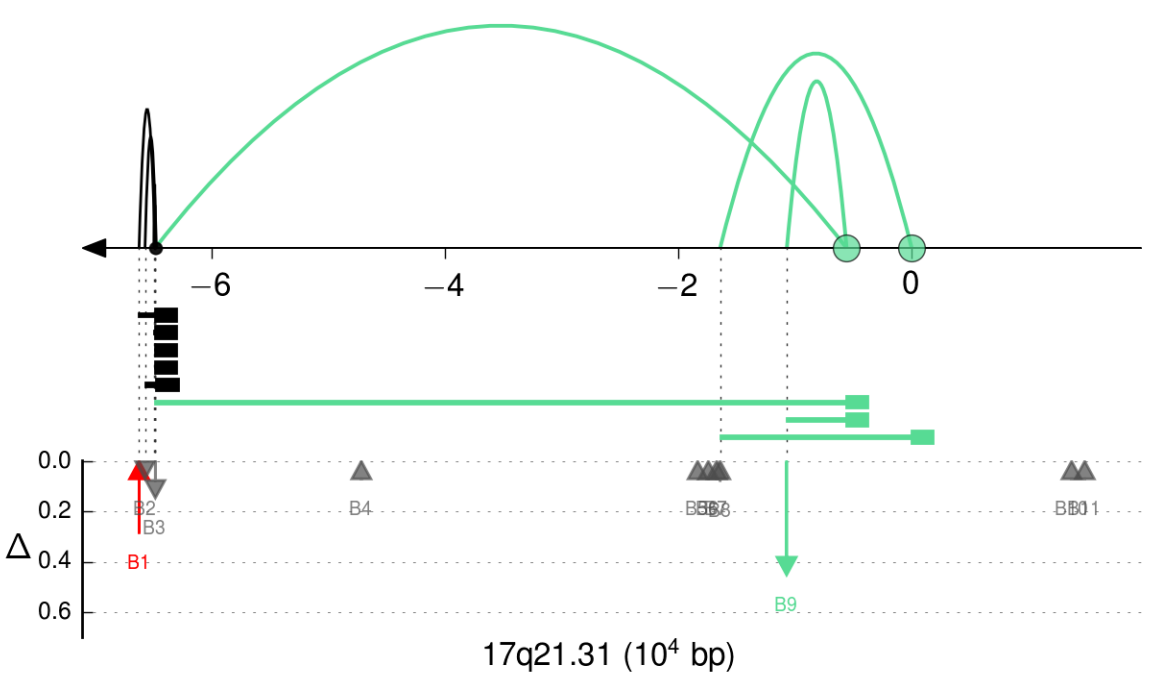

# *BRCA1*, KIRC

N: 72  
T: 535

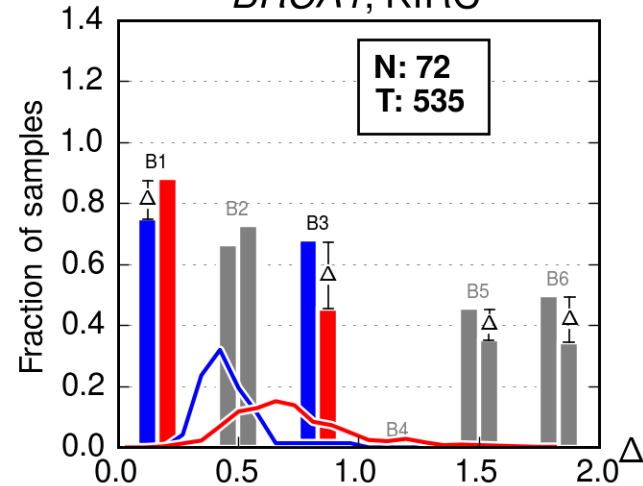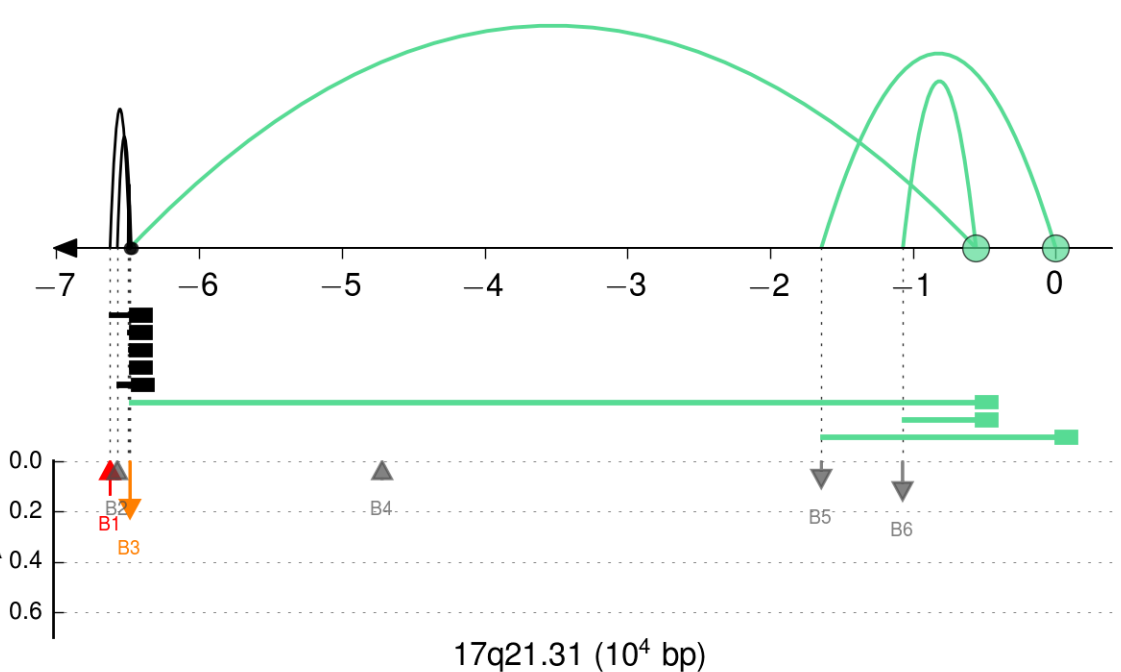

# BRCA1, KIRP

N: 32  
T: 290

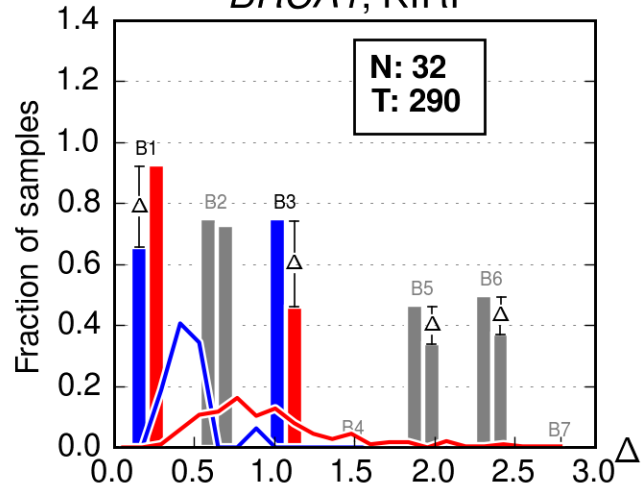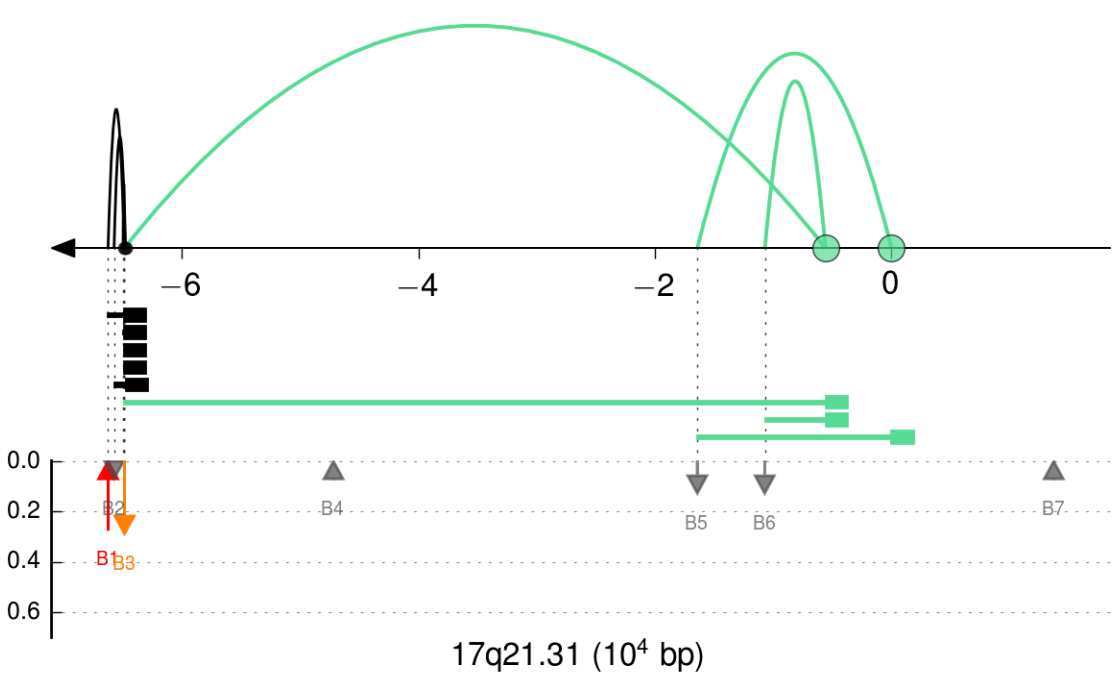

# BRCA1, UCEC

N: 24  
T: 185

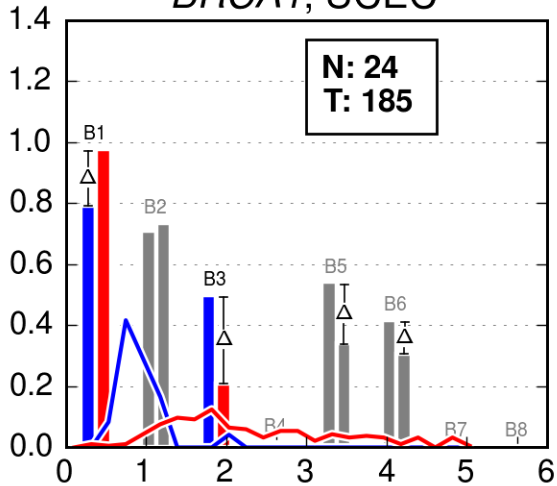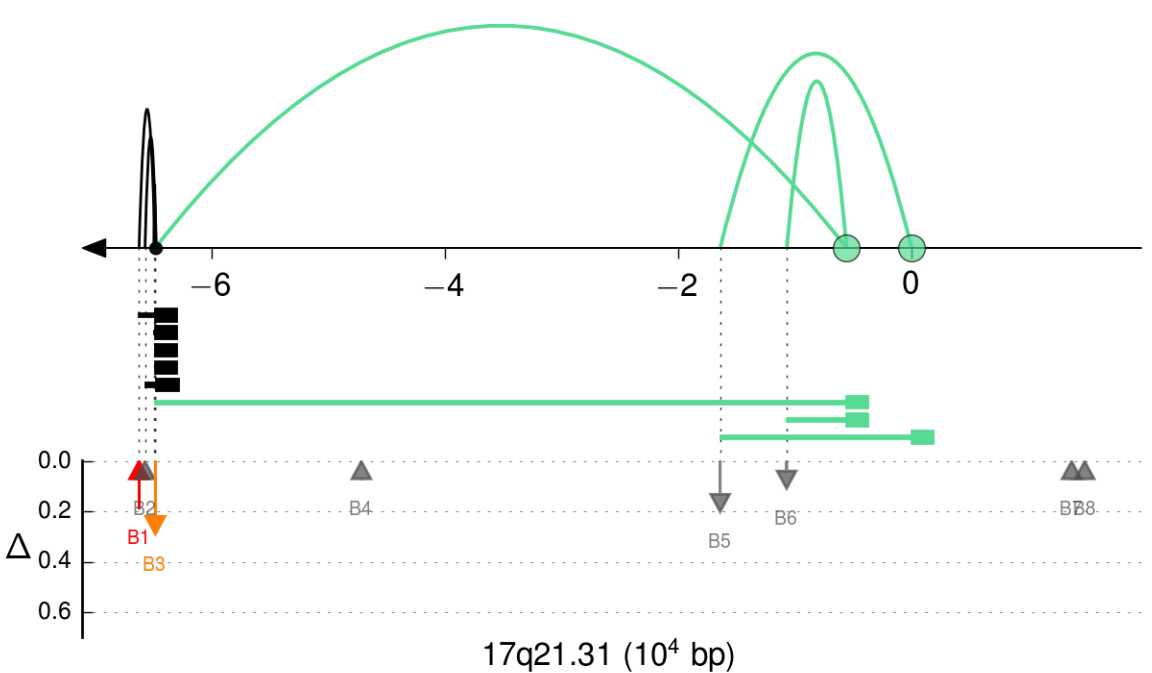

# CCNE1, BRCA

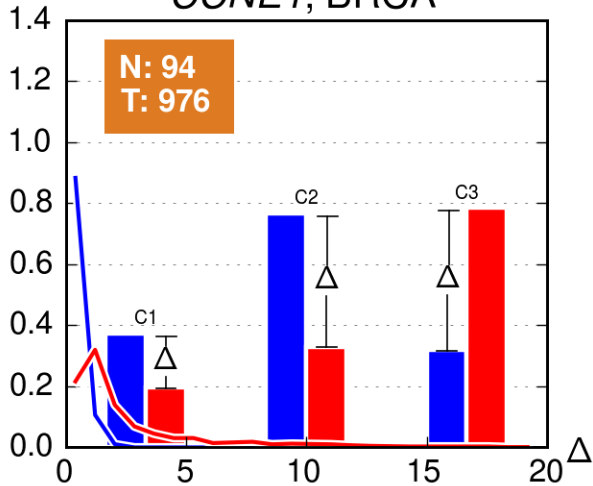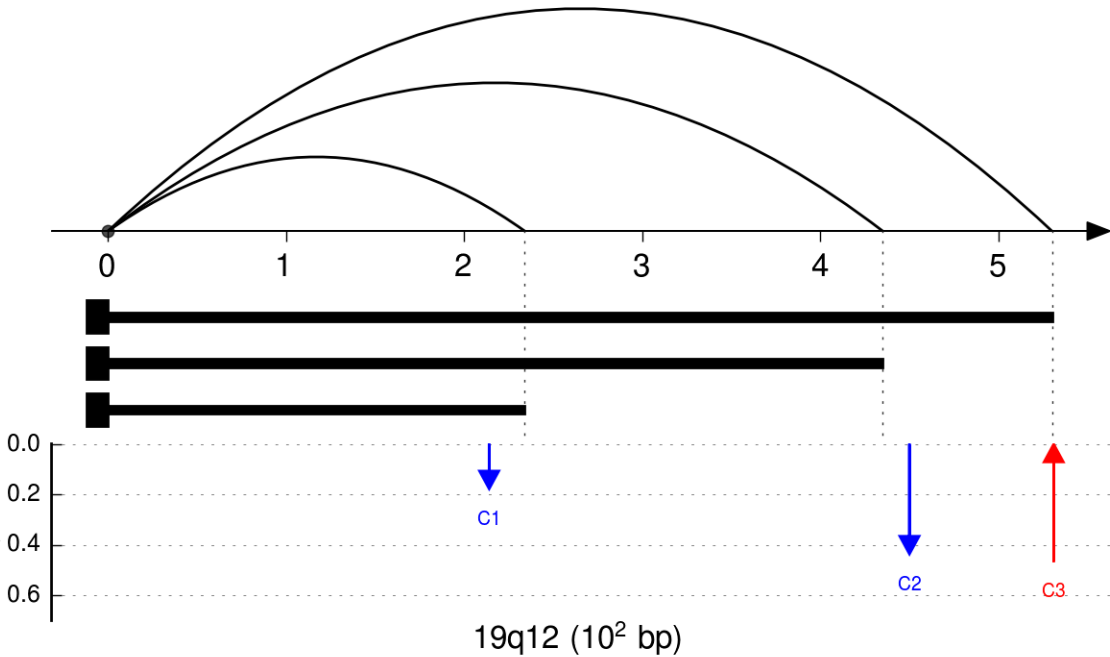

# CCNE1, HNSC

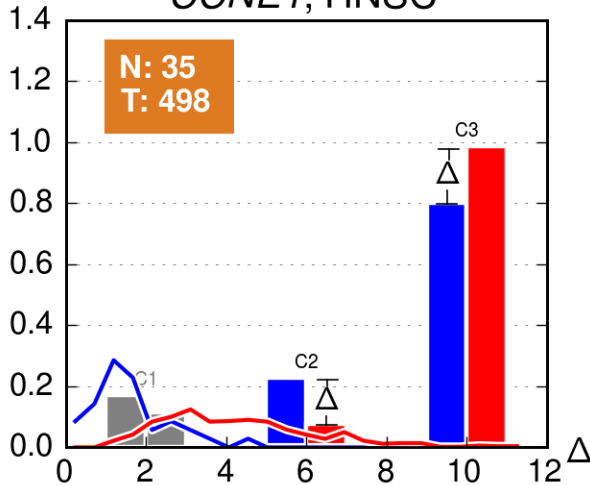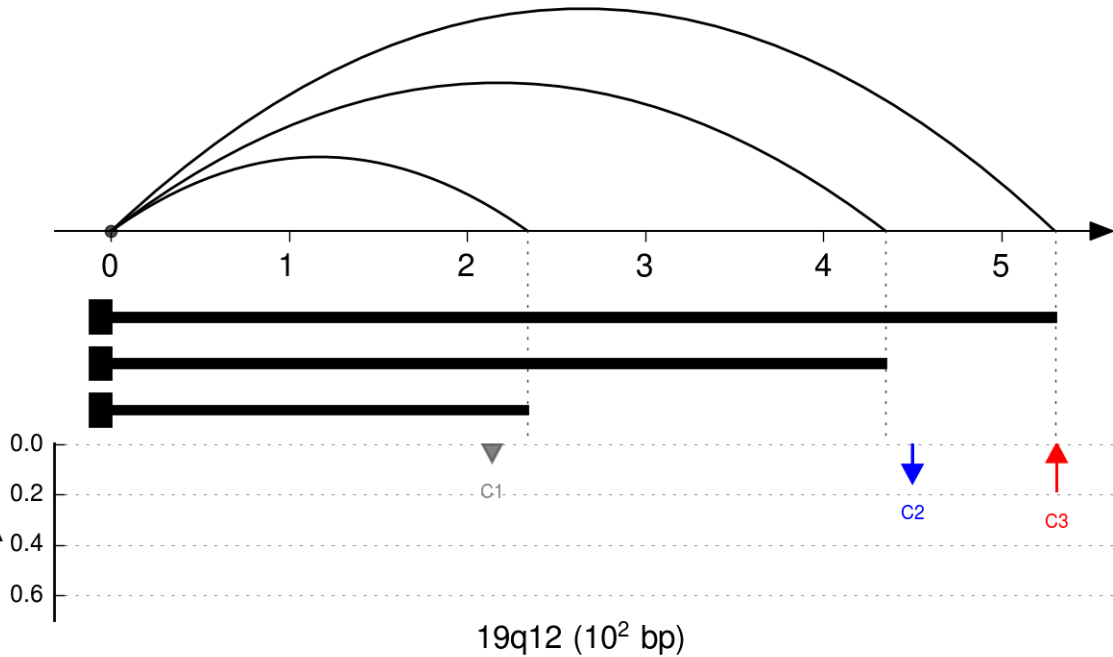

# CCNE1, KIRP

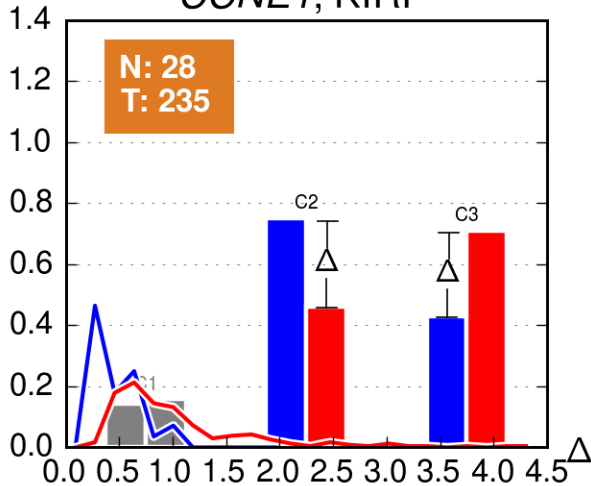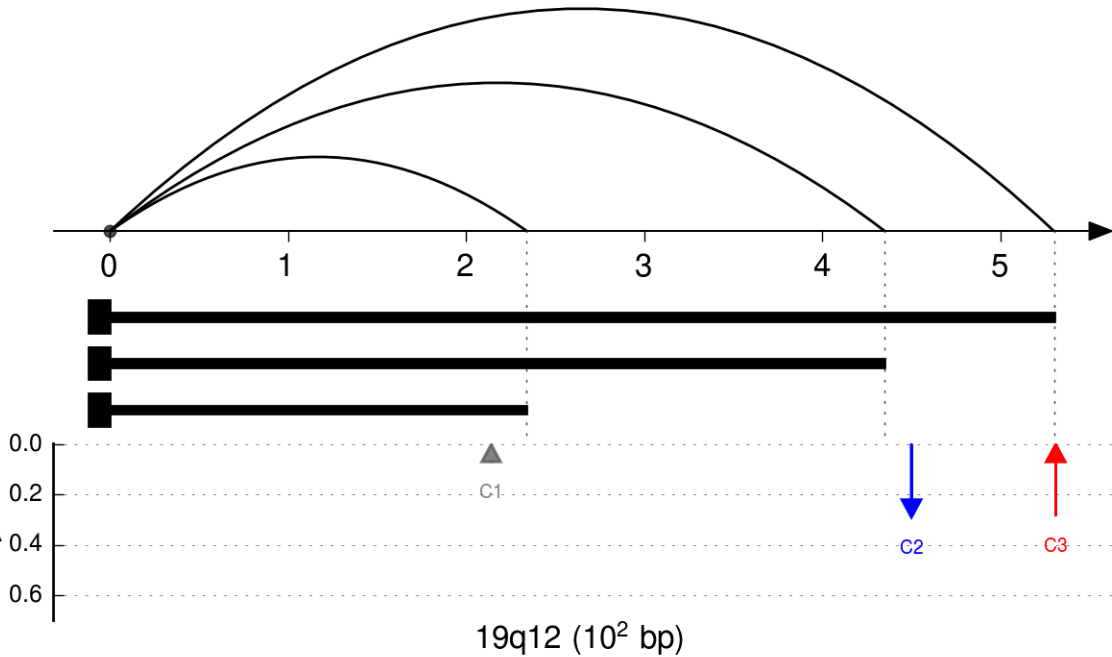

# CCNE1, LIHC

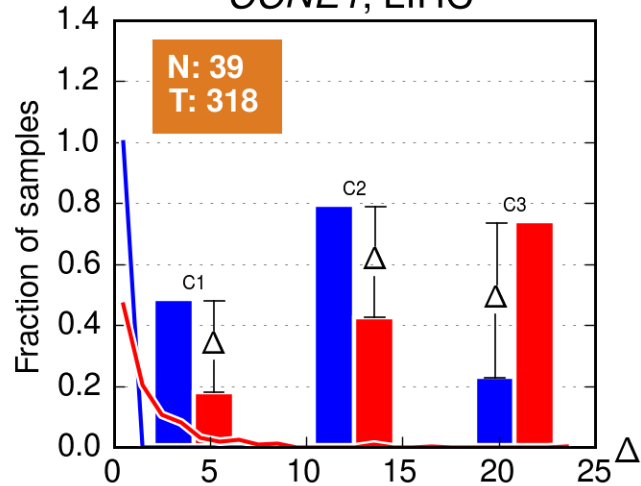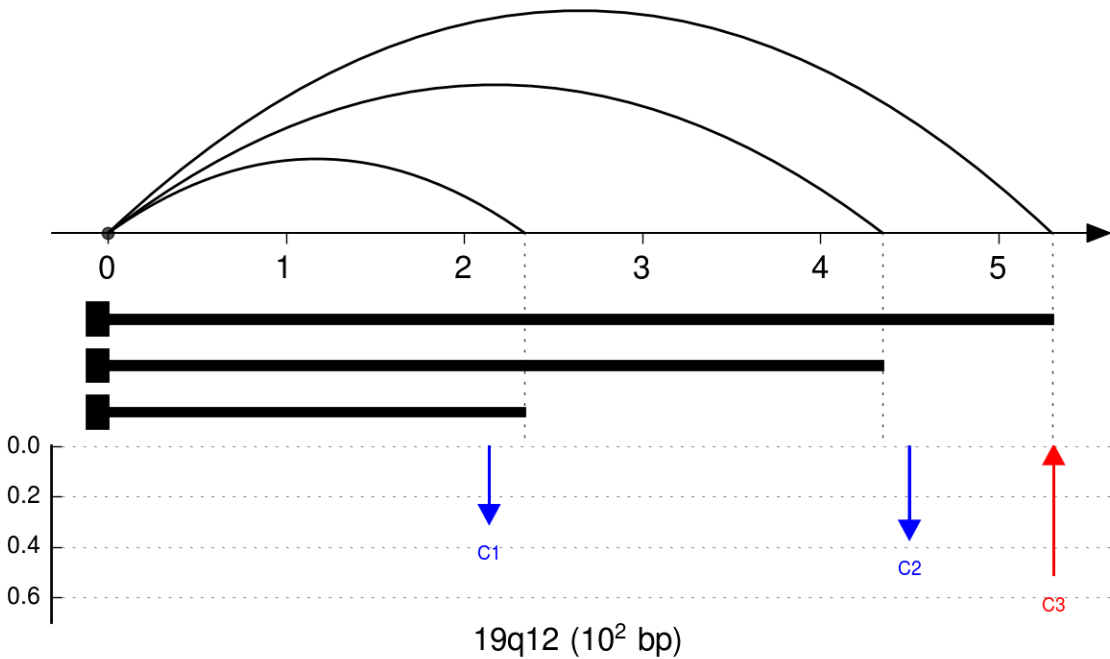

# CCNE1, LUAD

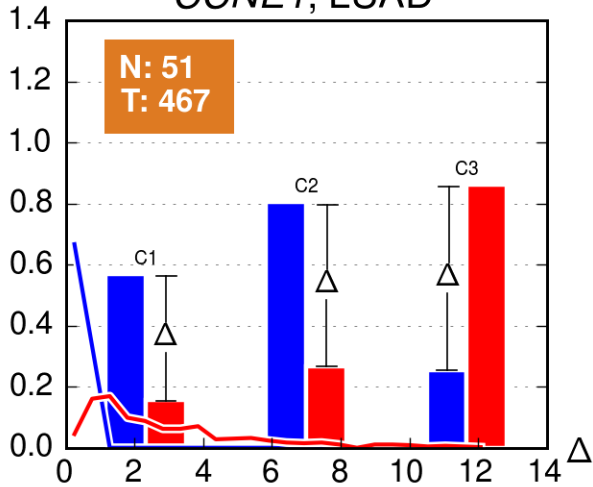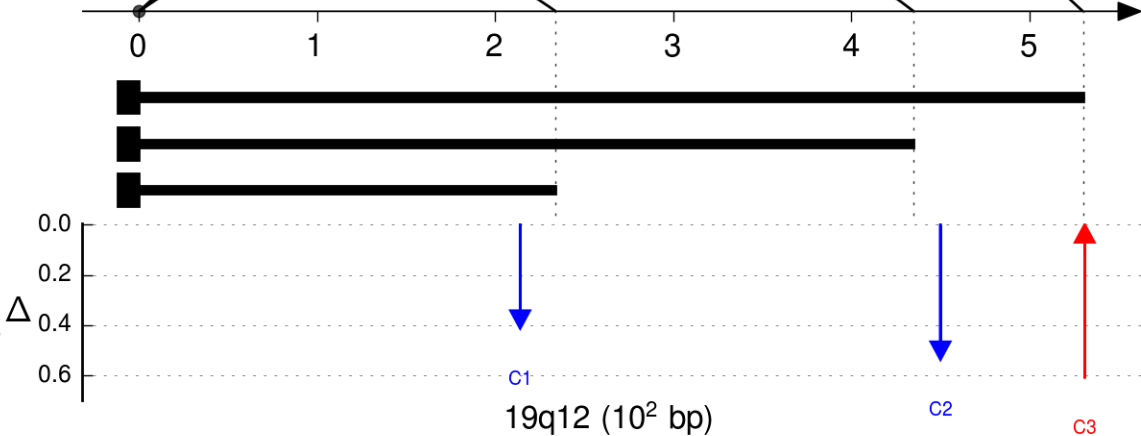

# CCNE1, LUSC

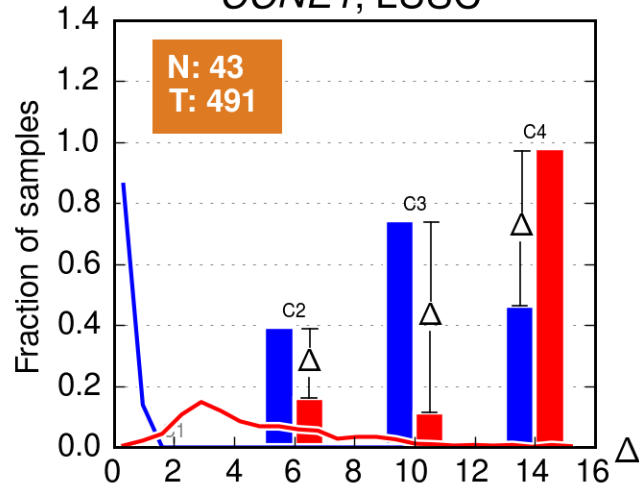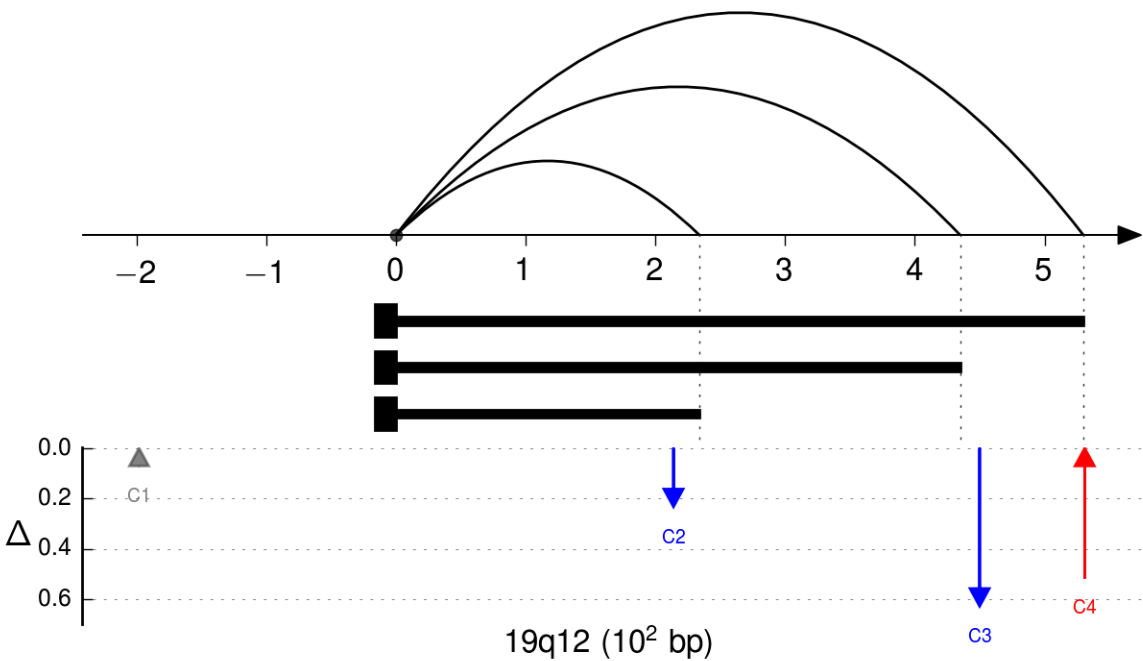

# CDKN2A, COAD

N: 39  
T: 298

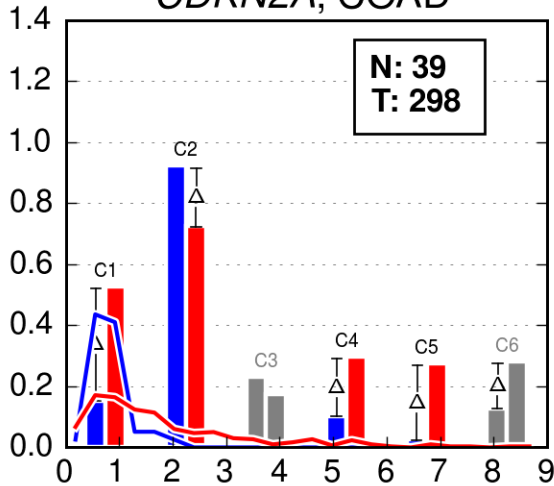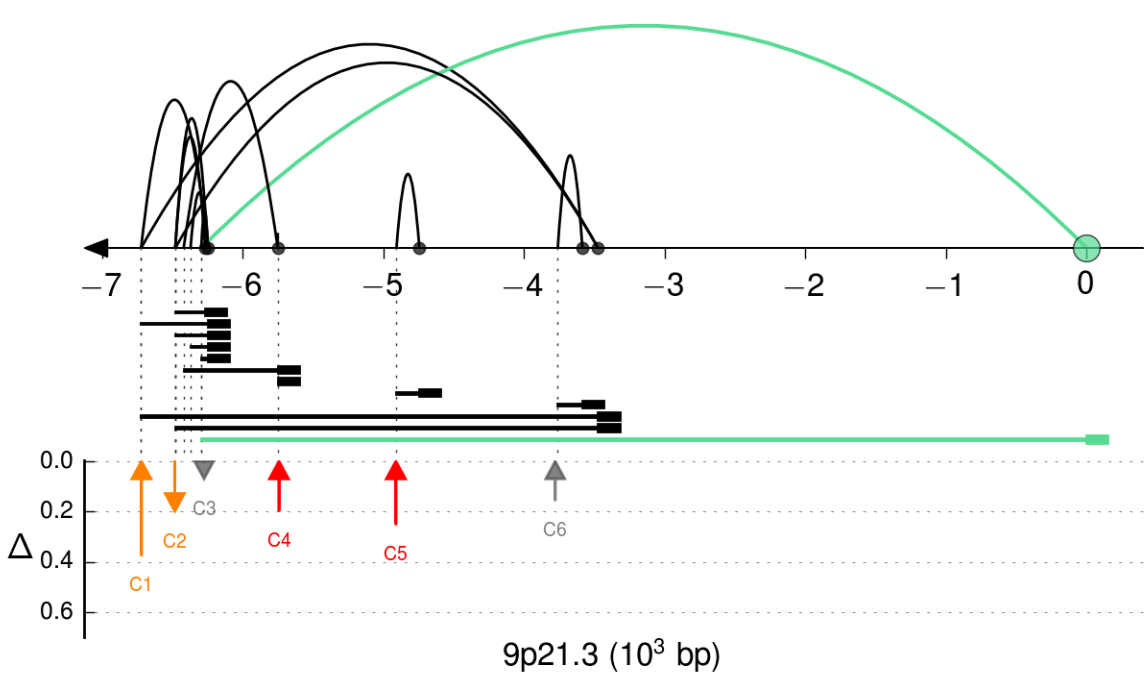

# *CDKN2A*, HNSC

**N: 40**  
**T: 506**

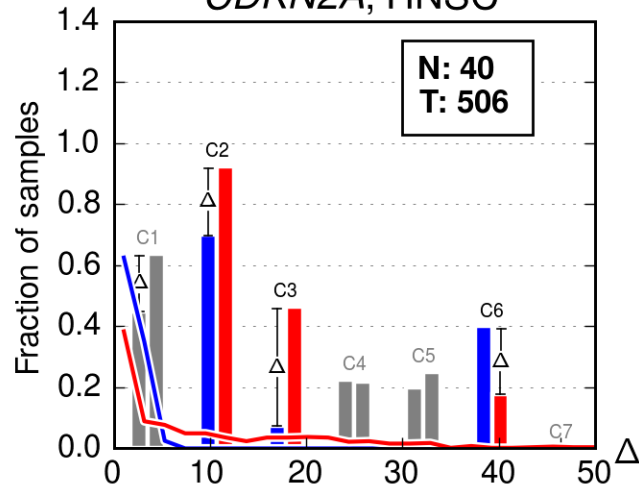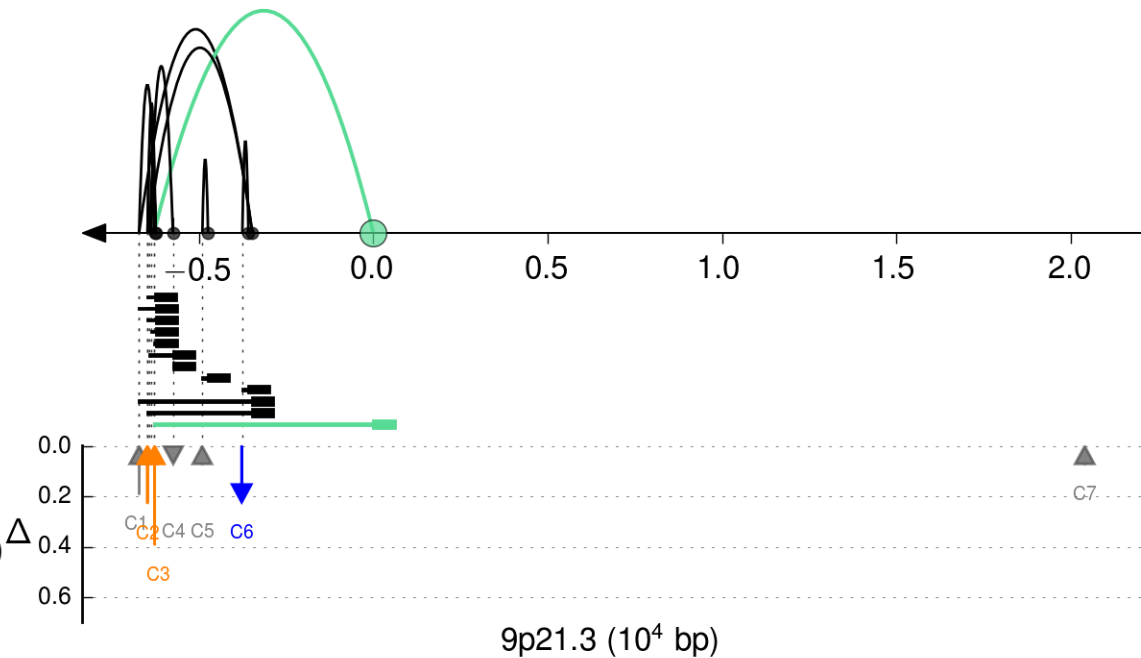

# CDKN2A, KICH

N: 22  
T: 63

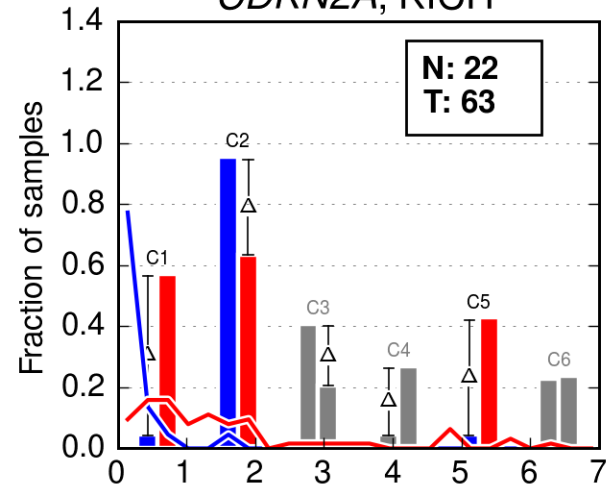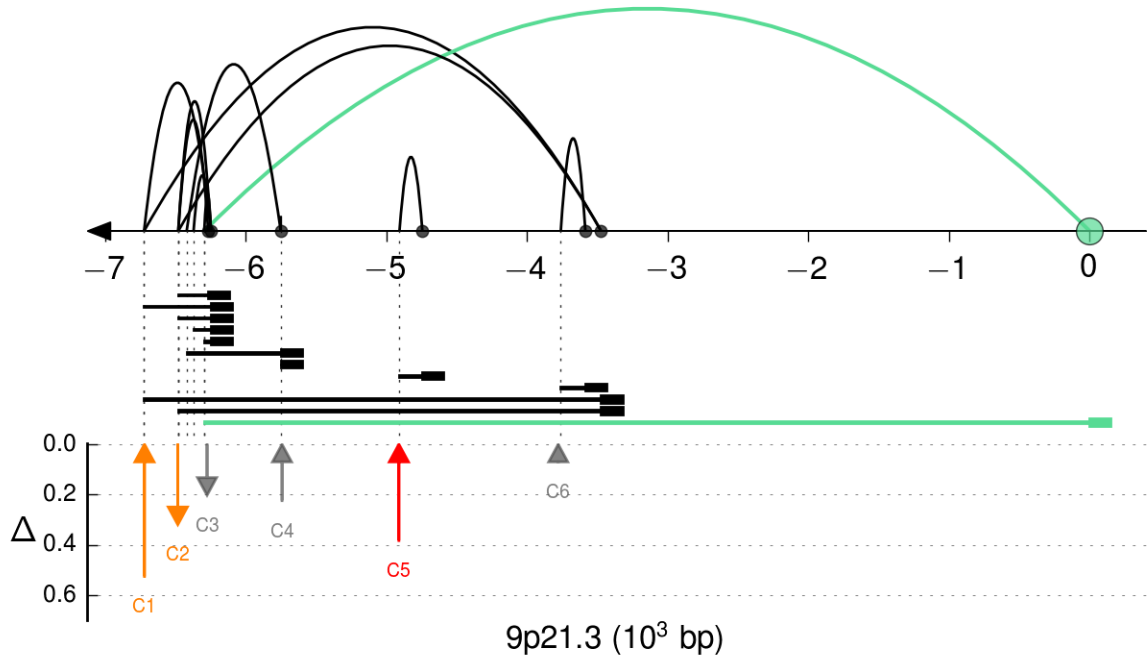

# CDKN2A, KIRC

N: 58  
T: 500

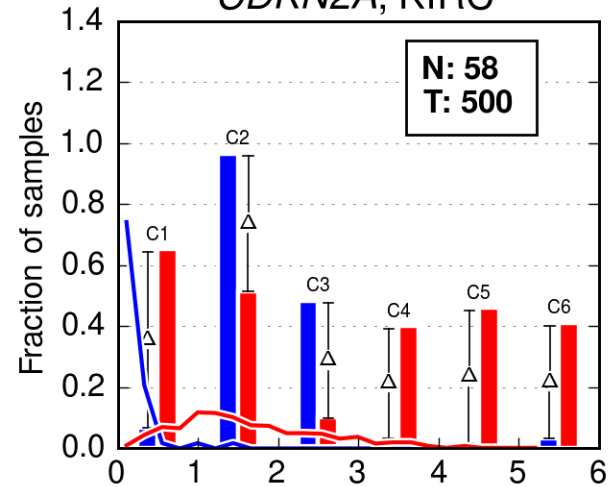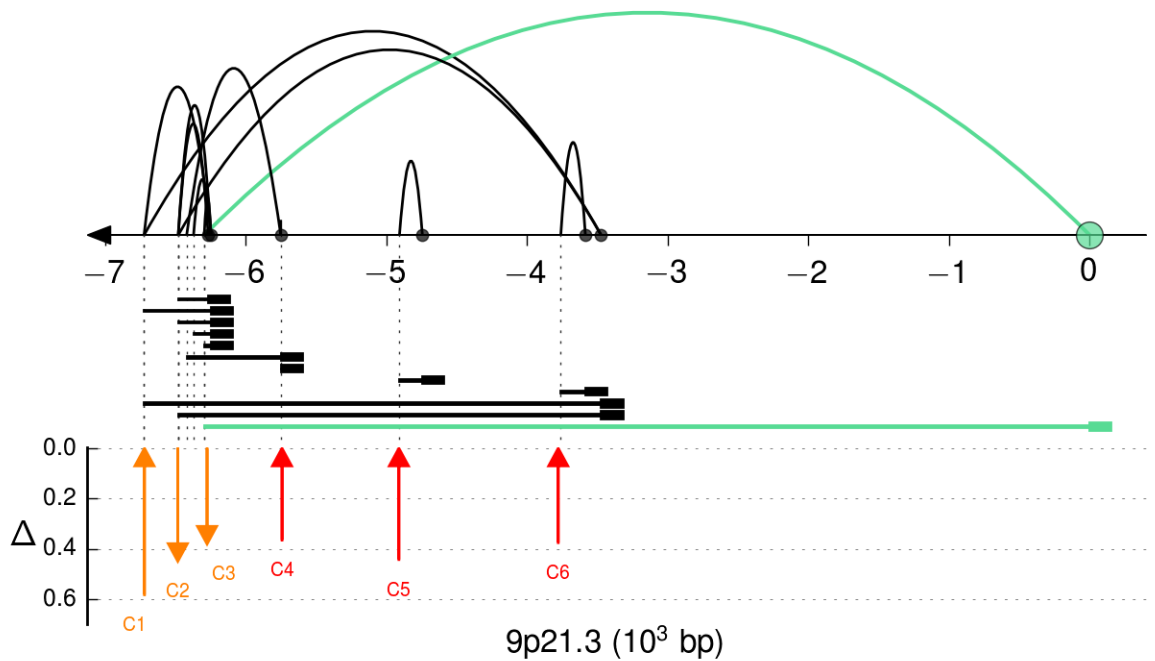

# CDKN2A, KIRP

N: 28  
T: 279

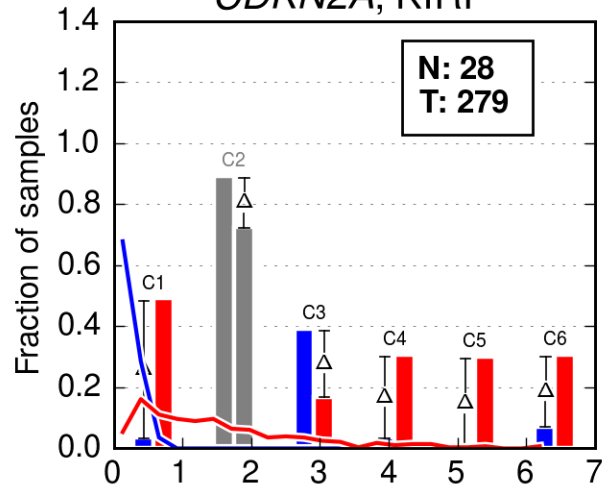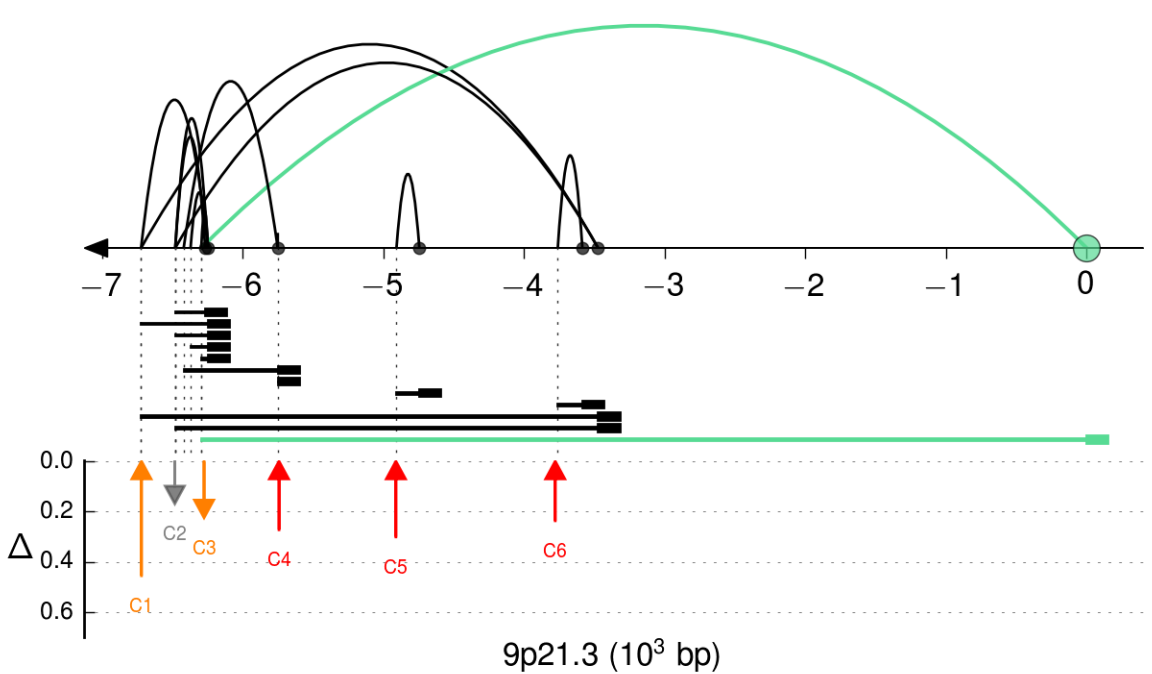

# CDKN2A, LIHC

N: 48  
T: 357

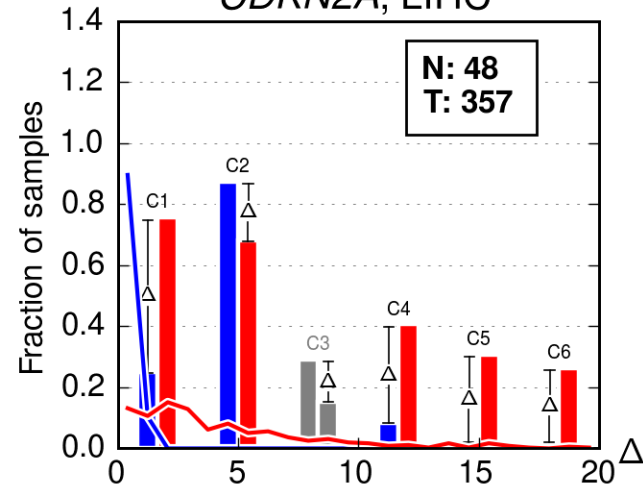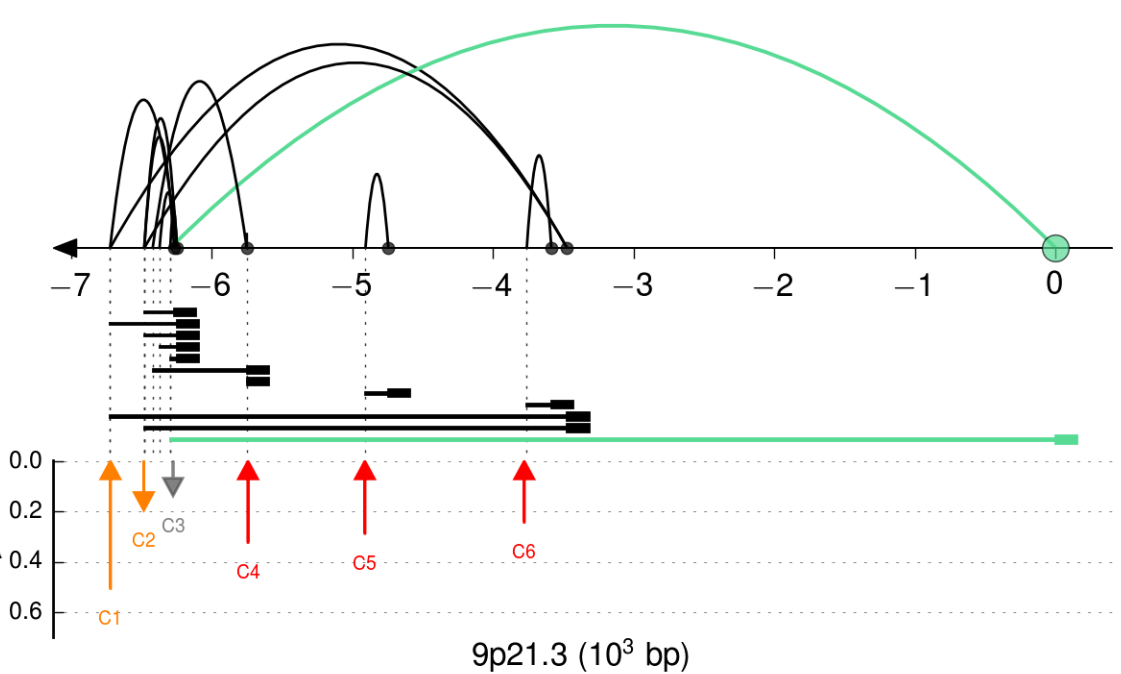

# CDKN2A, PRAD

N: 45  
T: 456

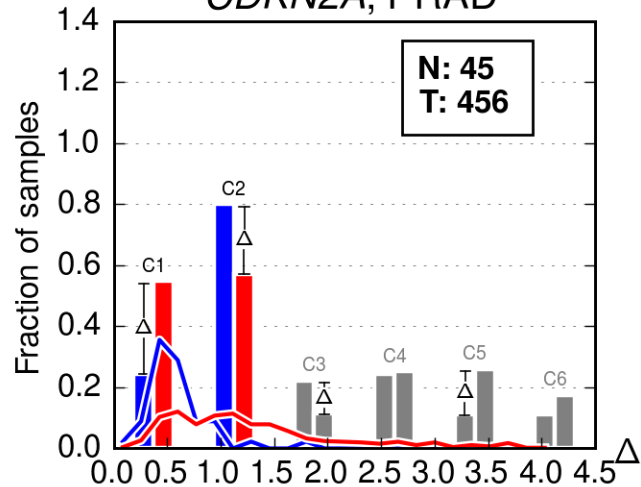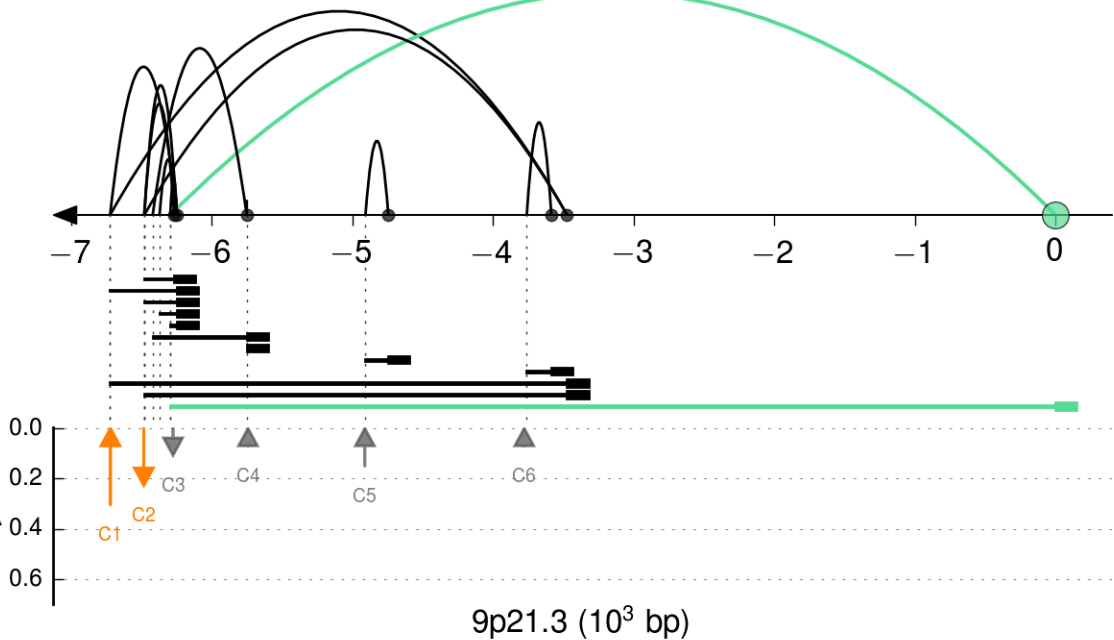

# CDKN2A, THCA

N: 58  
T: 463

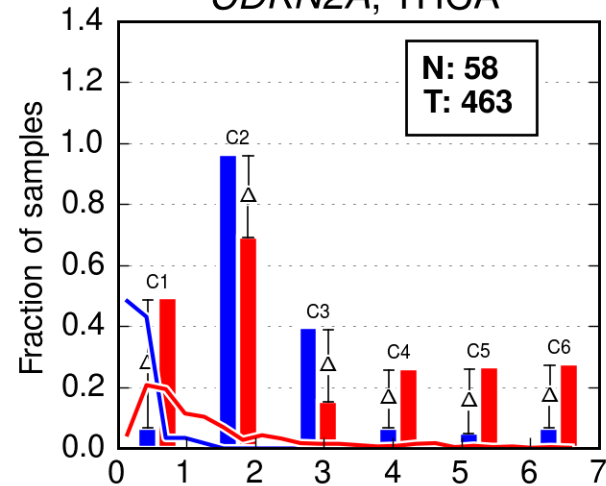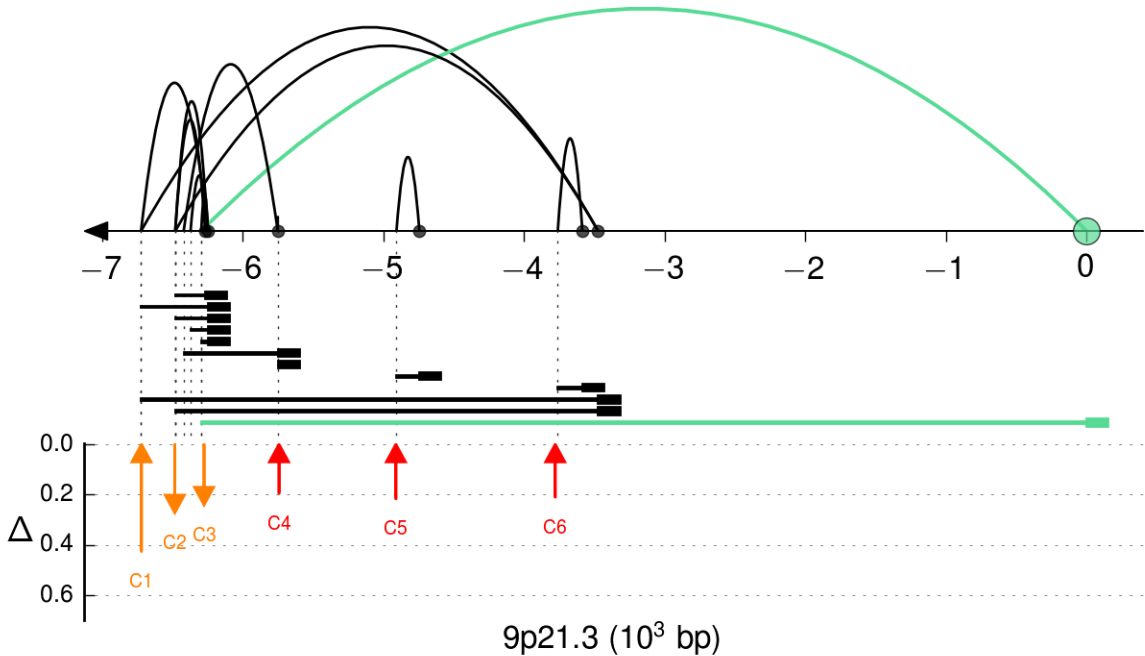

# CDKN2C, LIHC

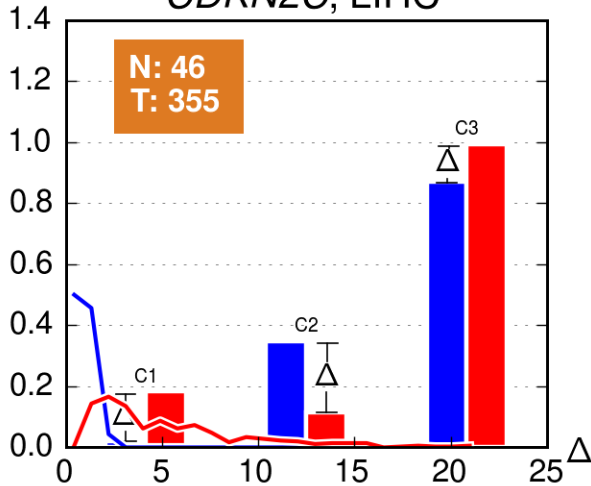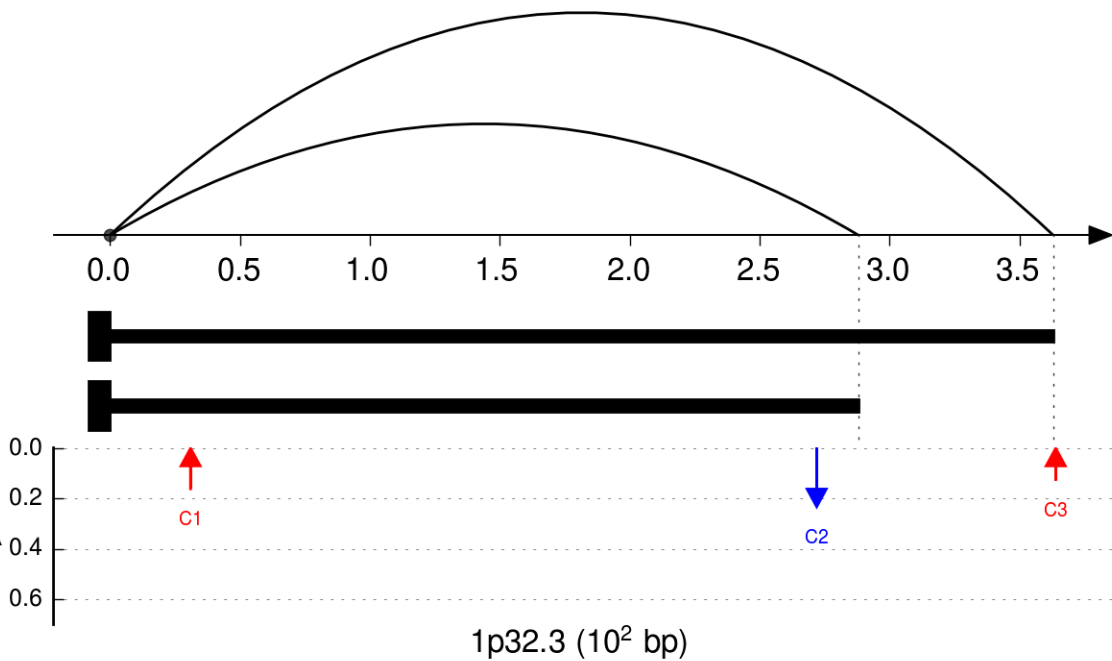

# CHURC1, LUAD

N: 58  
T: 528

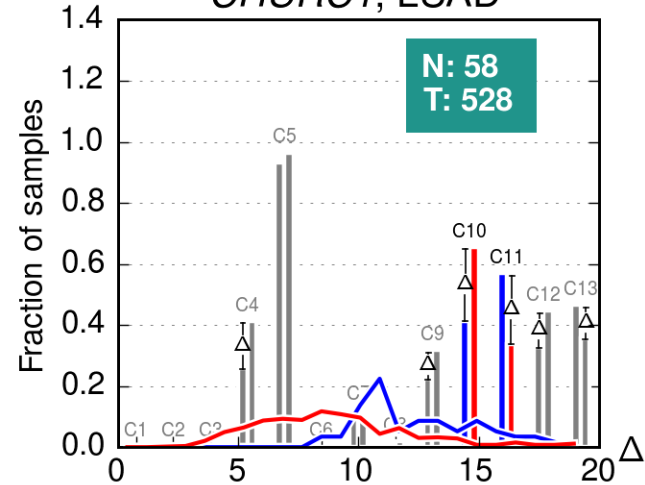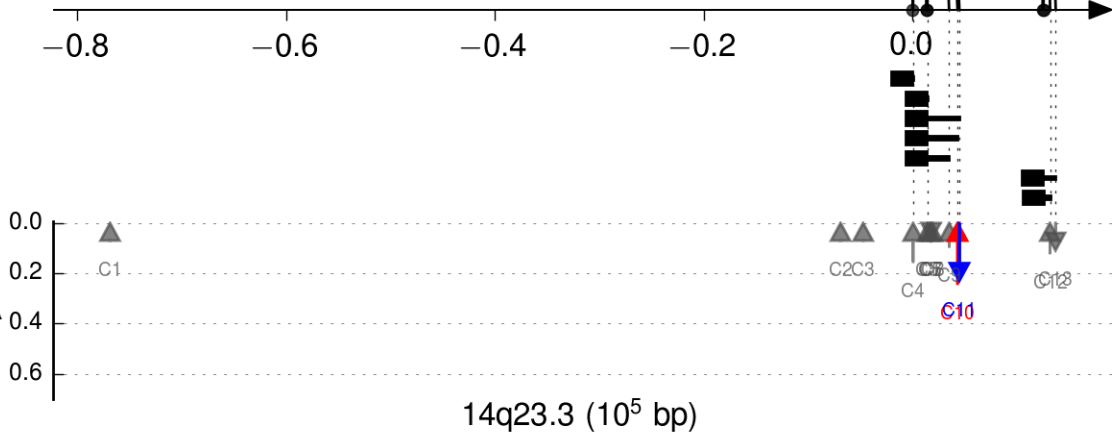

# CHURC1, LUSC

N: 51  
T: 504

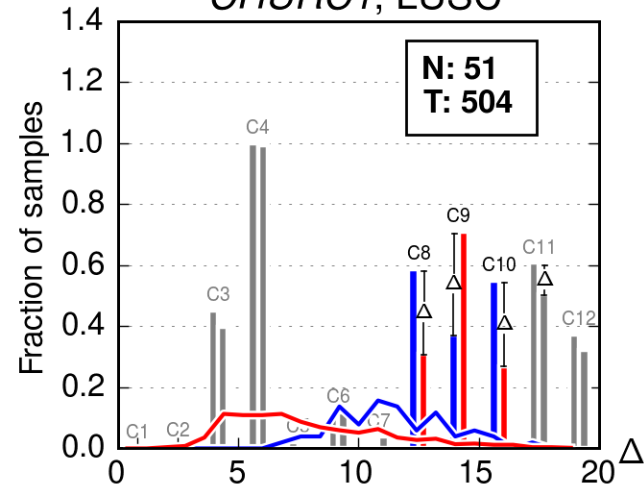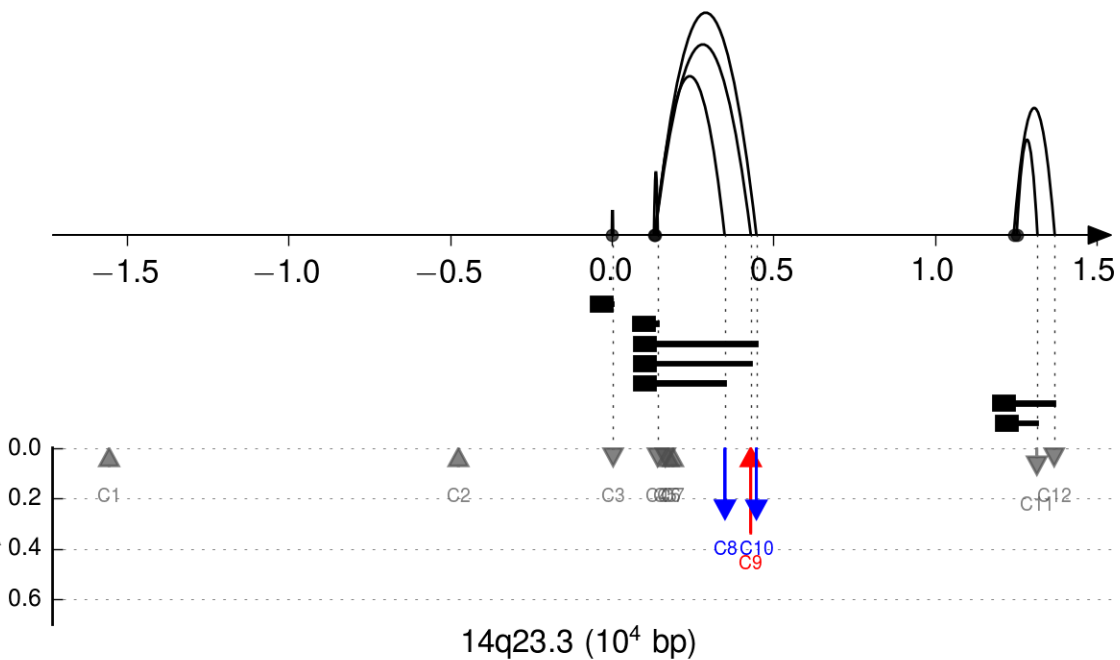

# DRAM1, LUAD

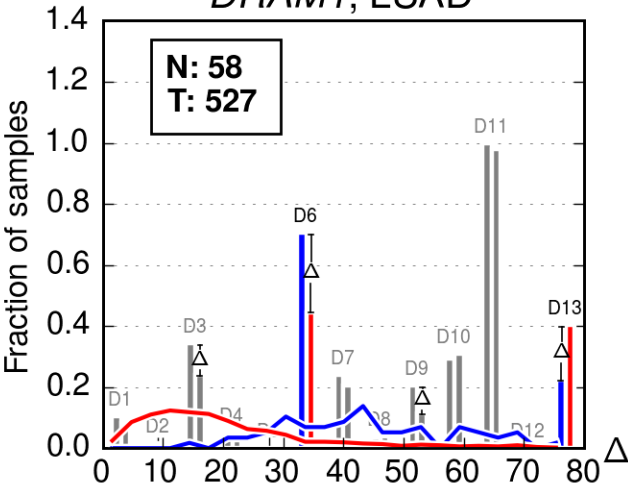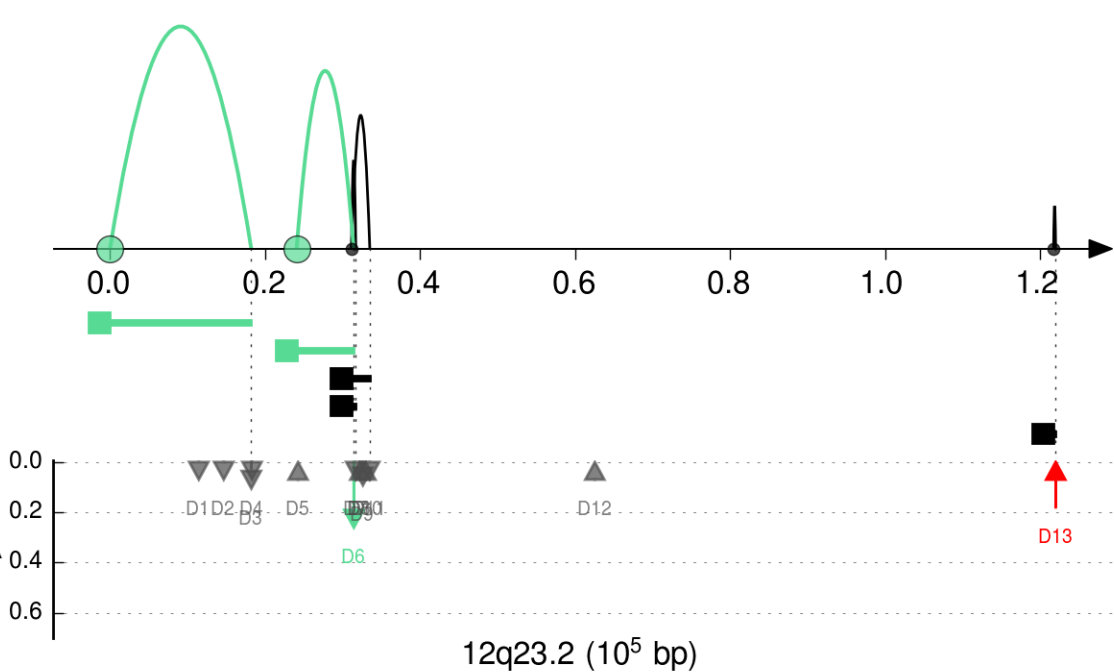

# DRAM1, LUSC

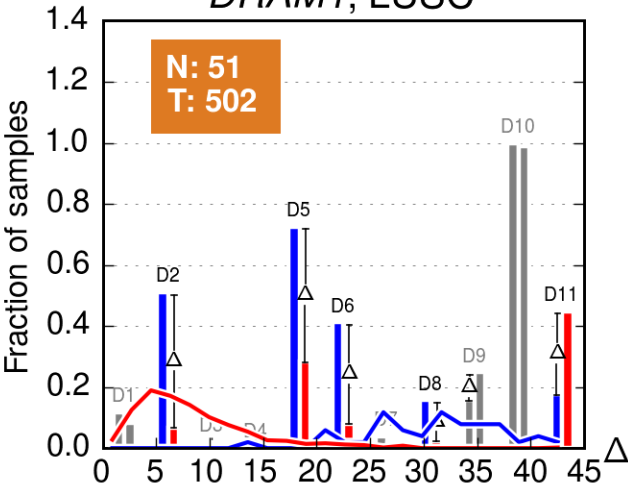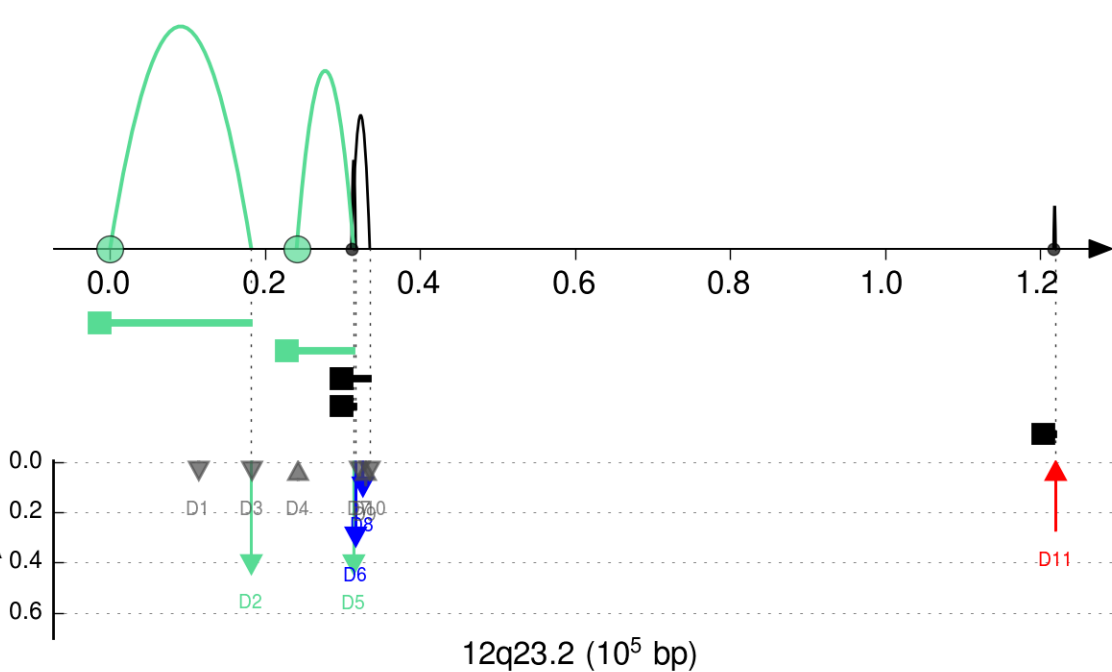

# EZH2, BRCA

N: 105  
T: 1093

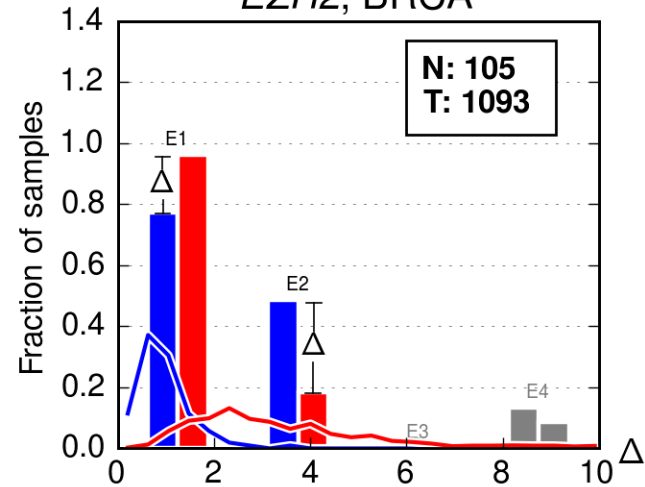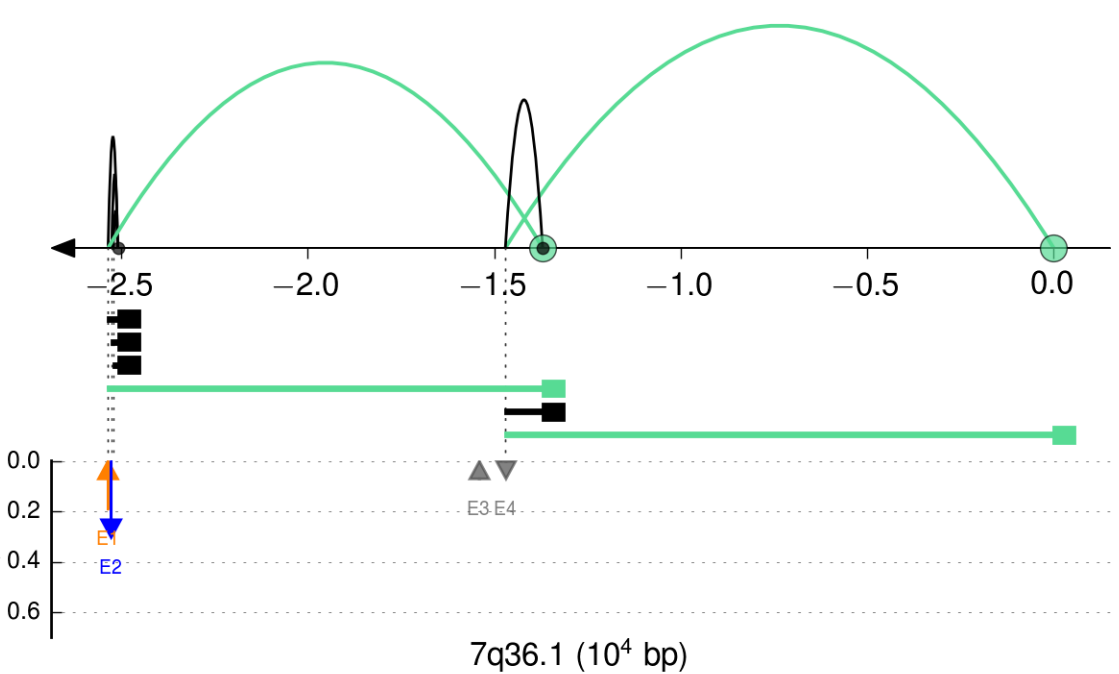

# *EZH2*, KIRC

**N: 64**  
**T: 497**

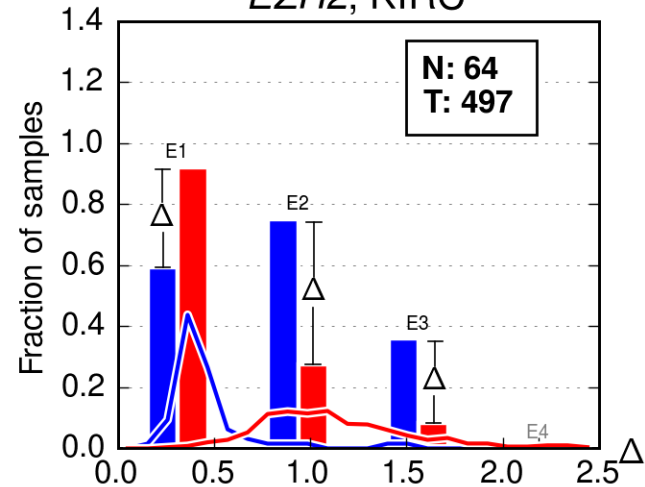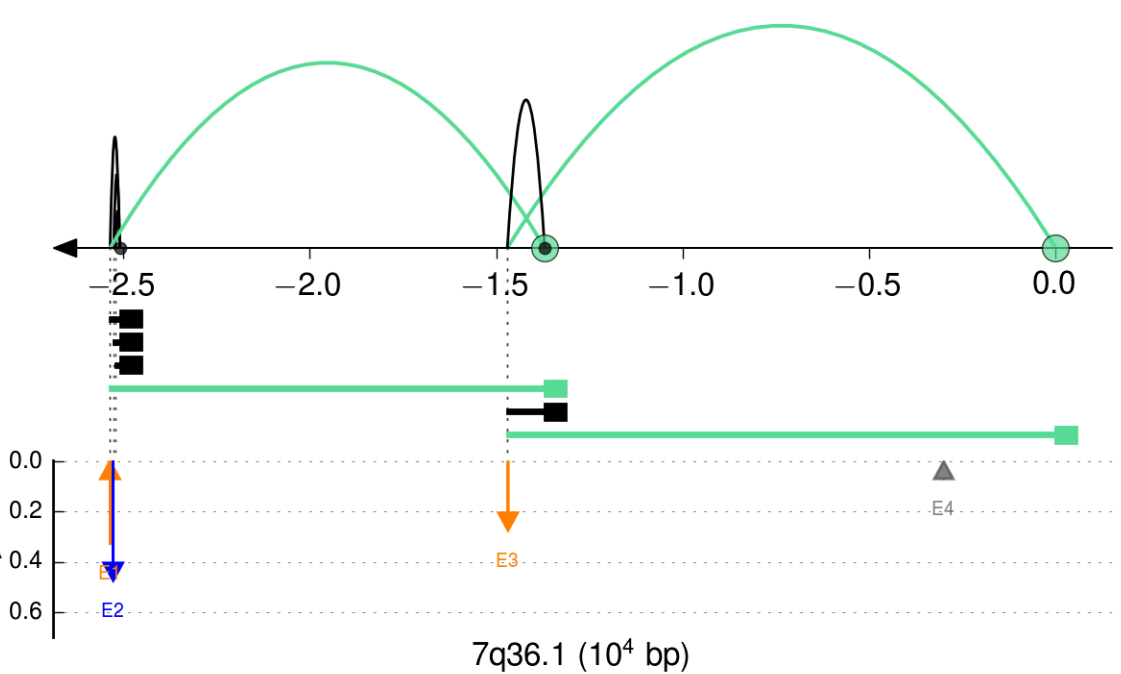

# *EZH2, KIRP*

**N: 29**  
**T: 268**

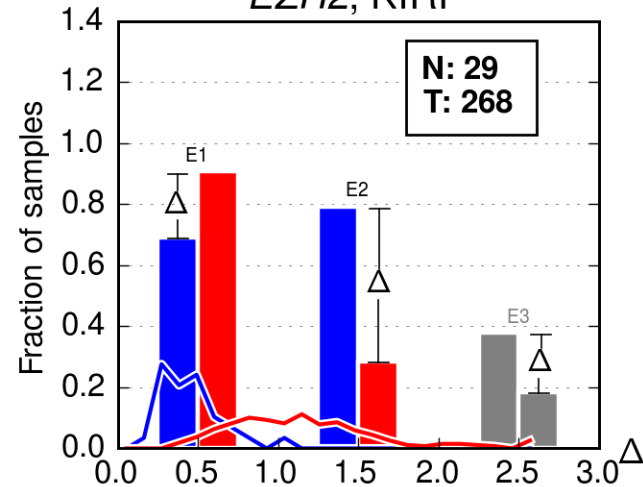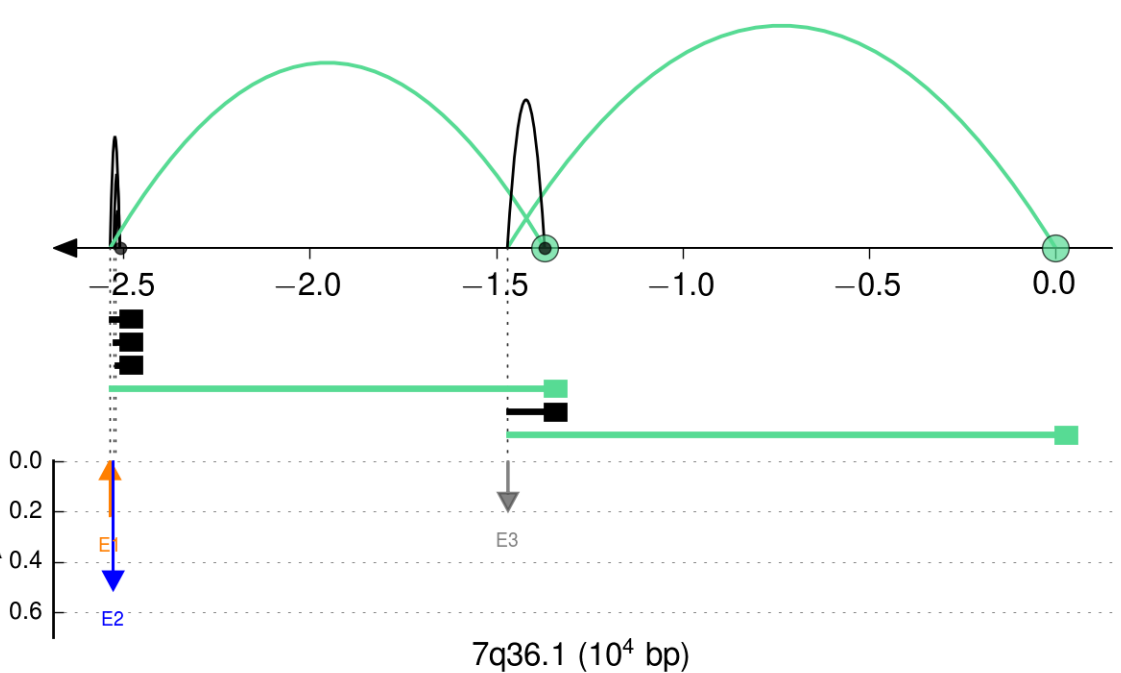

# EZH2, LIHC

N: 48  
T: 356

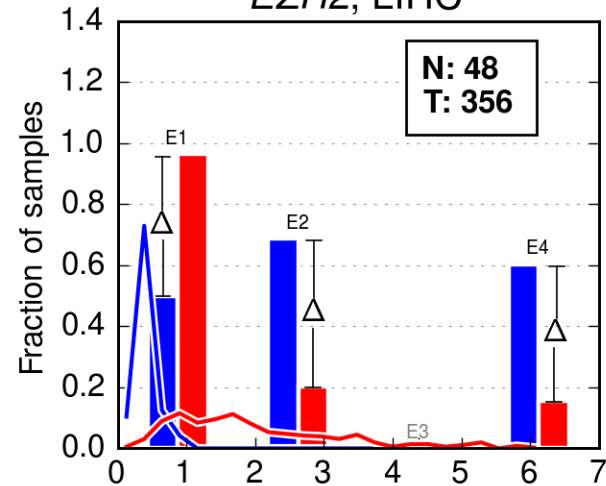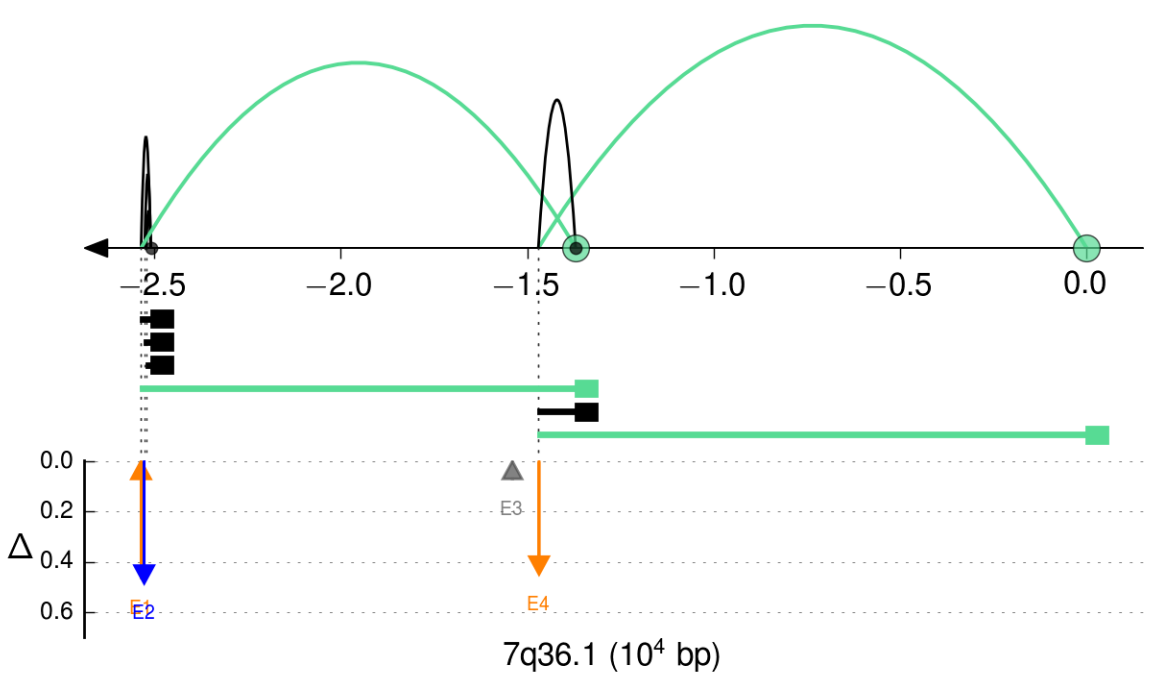

# EZH2, LUAD

N: 56  
T: 498

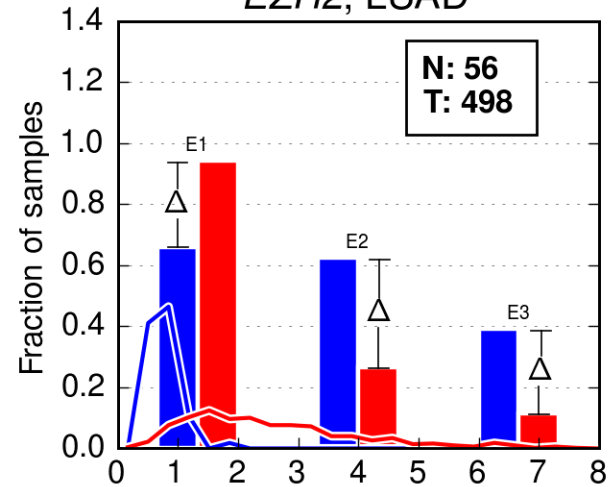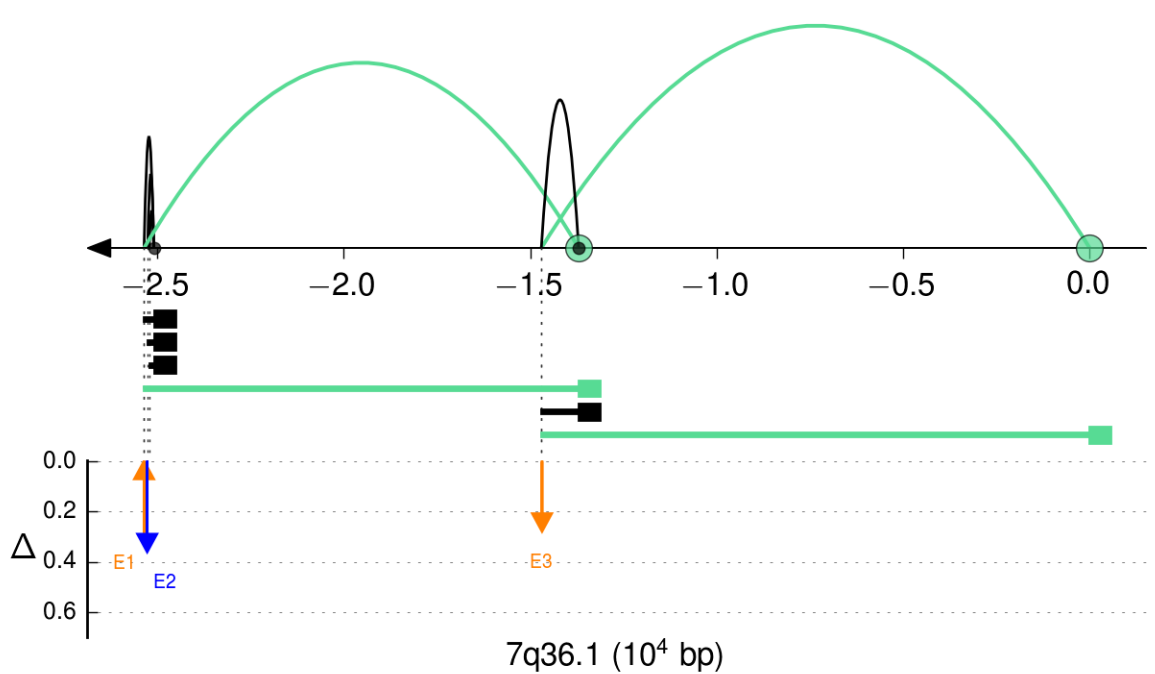

# EZH2, PRAD

N: 49  
T: 475

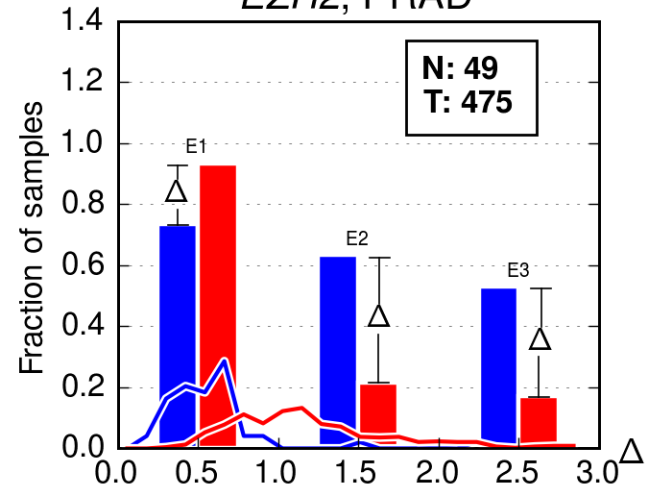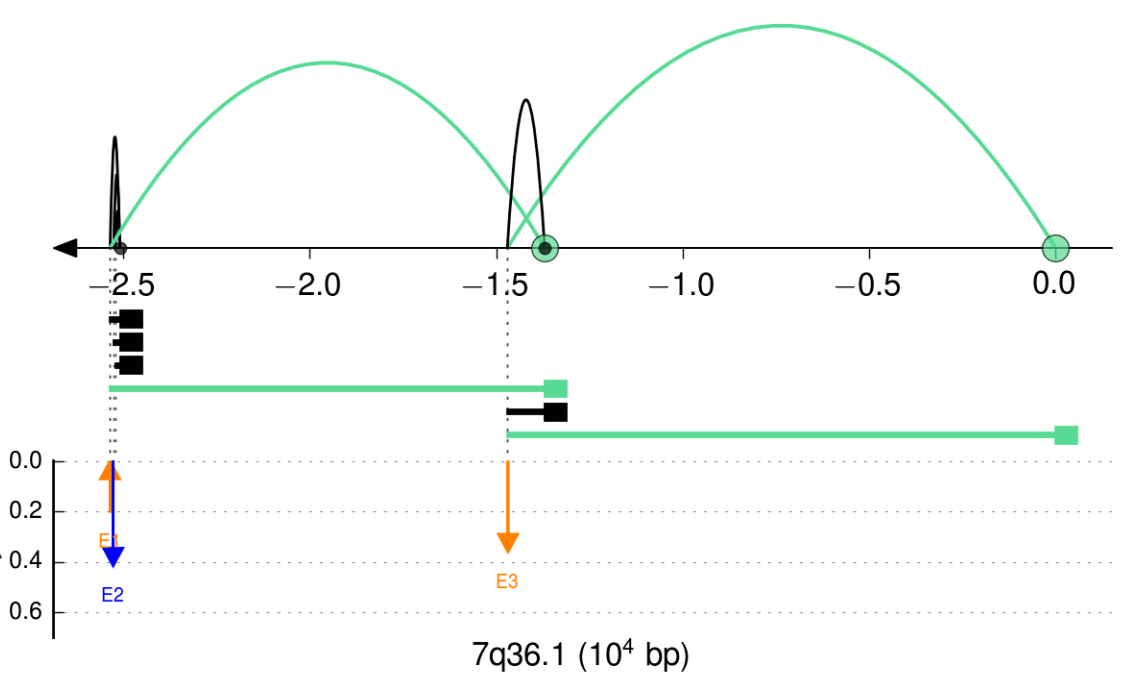

# EZH2, THCA

N: 57  
T: 482

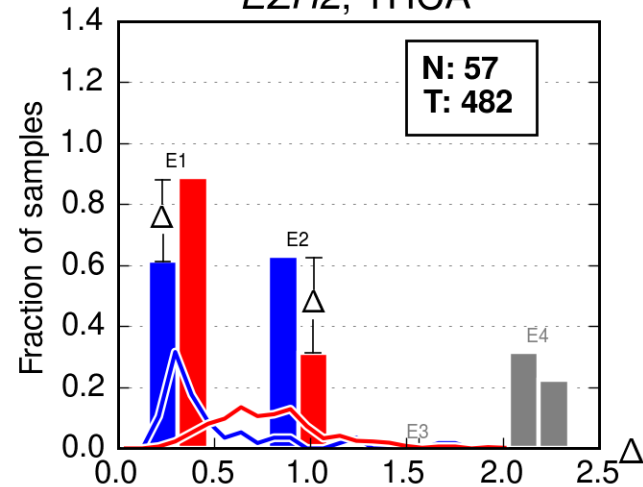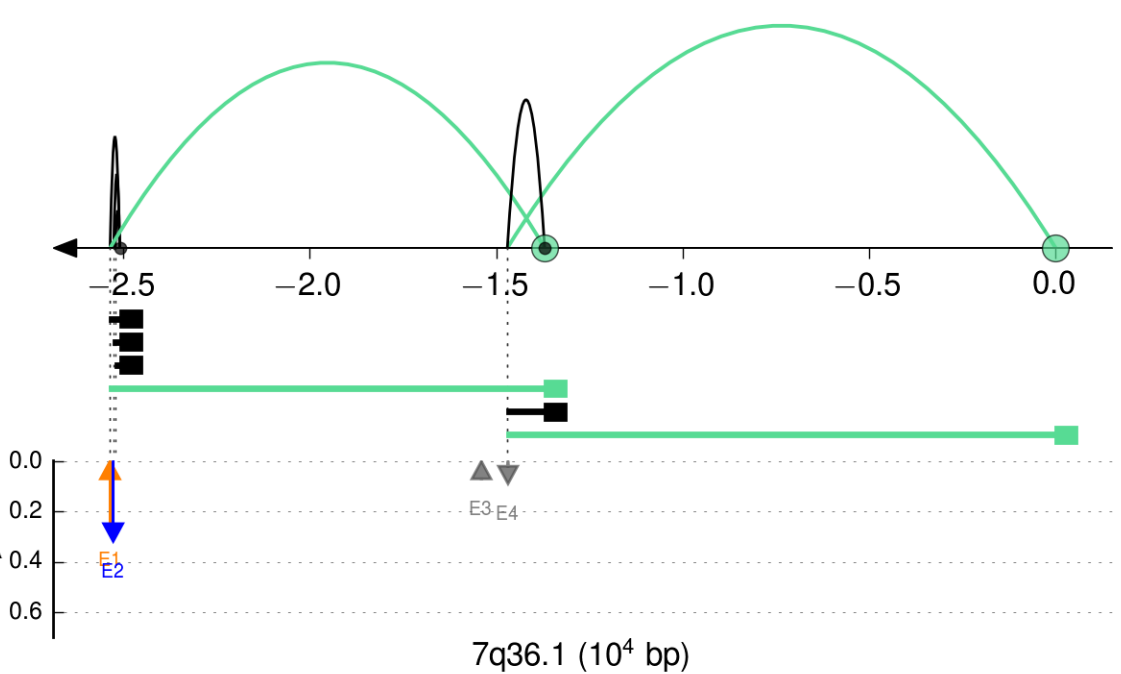

# FGF2, BRCA

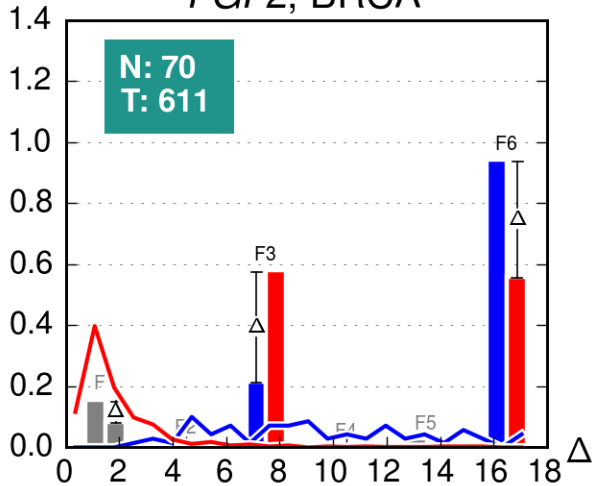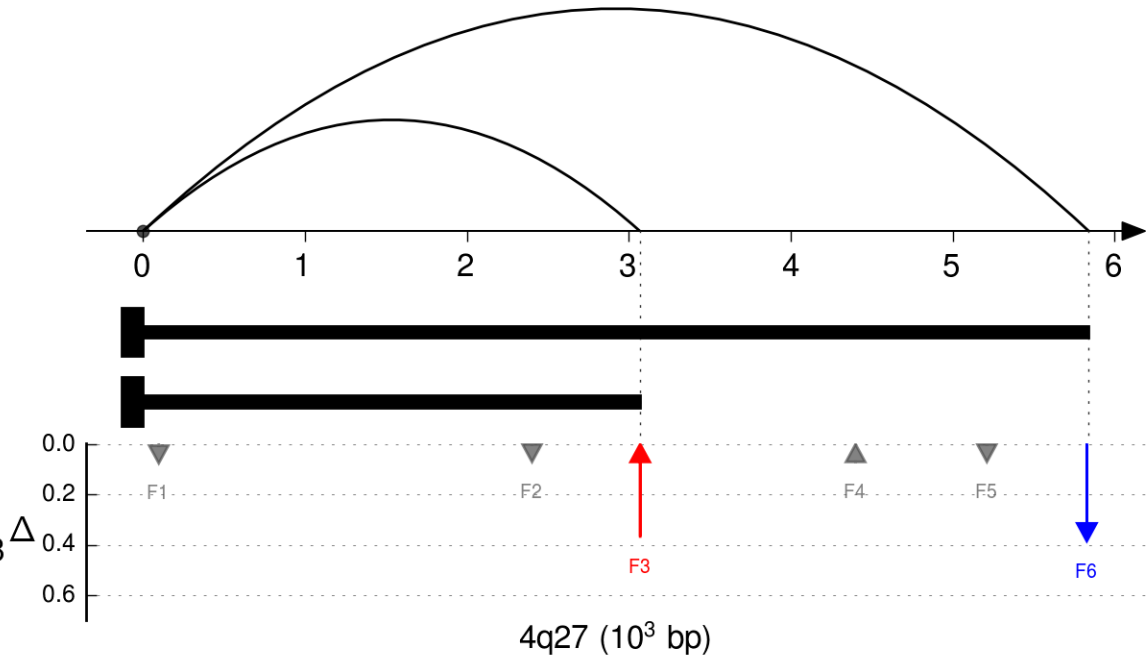

# FGF2, LUAD

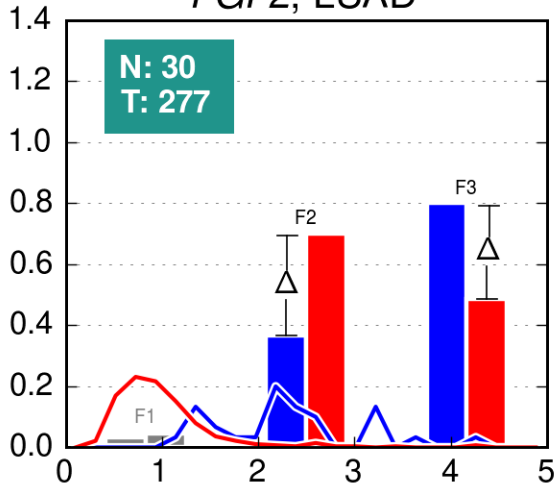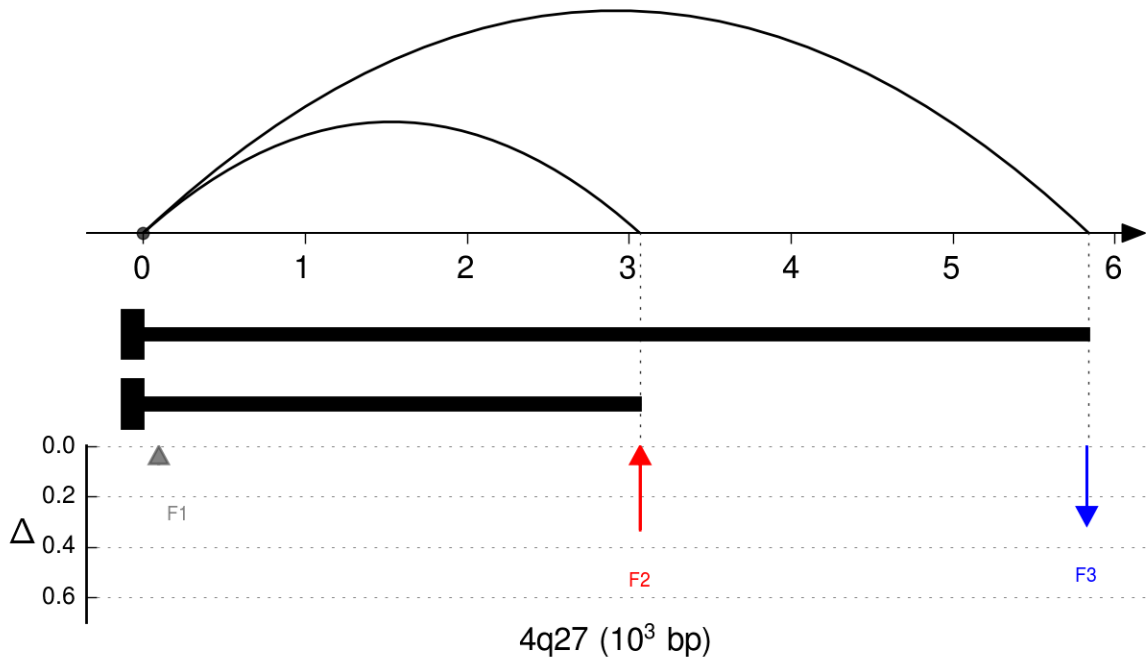

# FGF2, LUSC

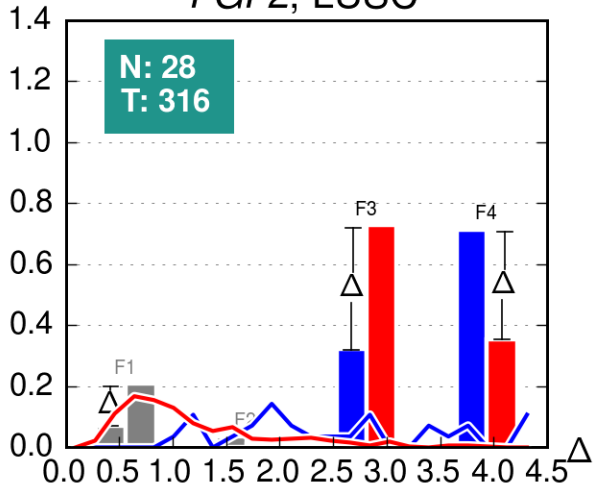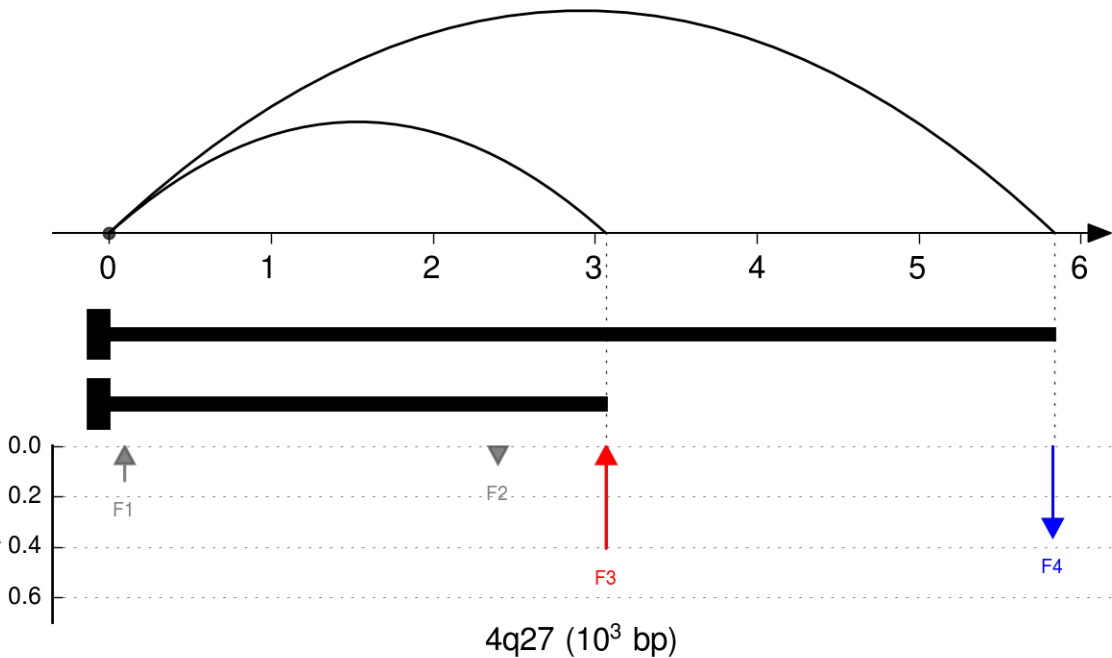

# FGF2, PRAD

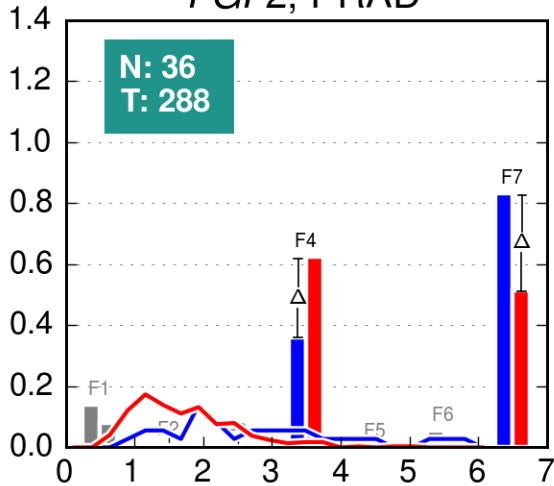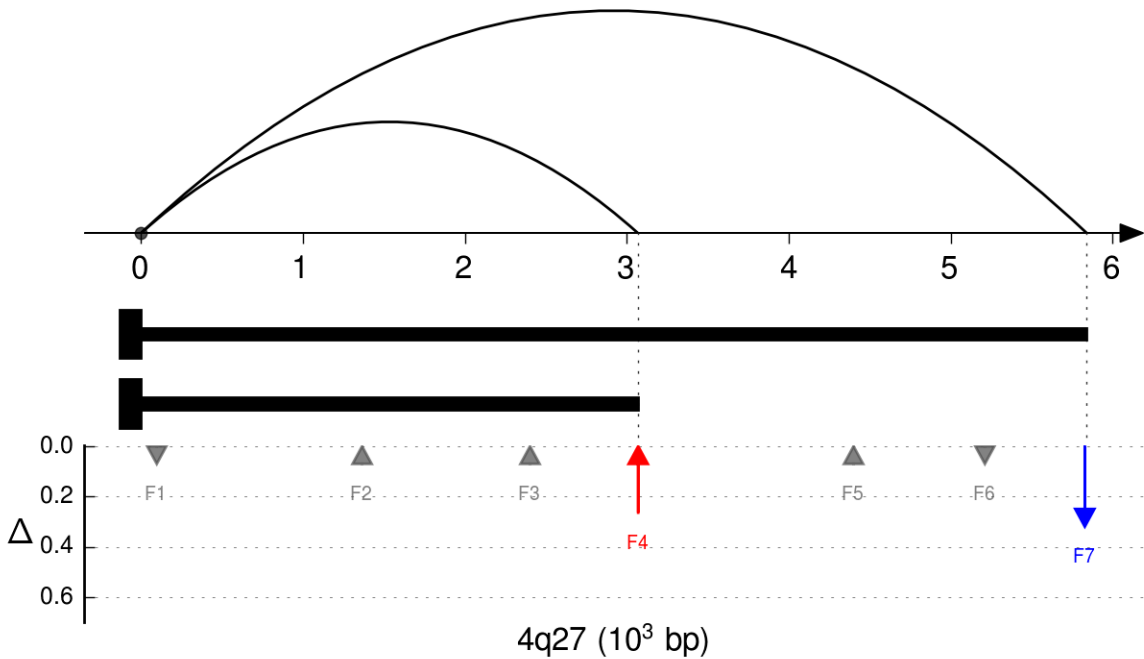

# FGF2, THCA

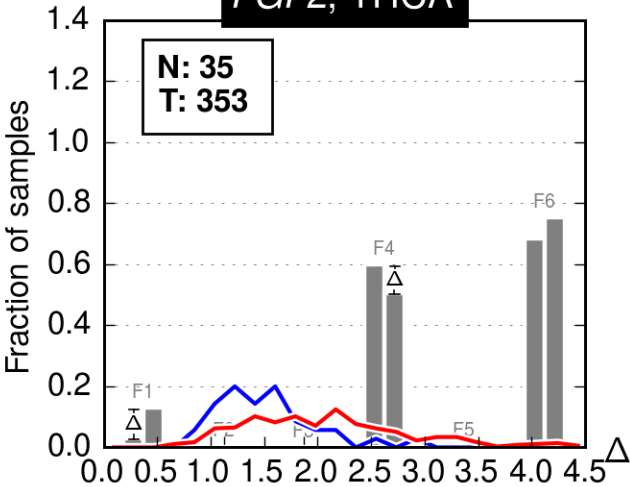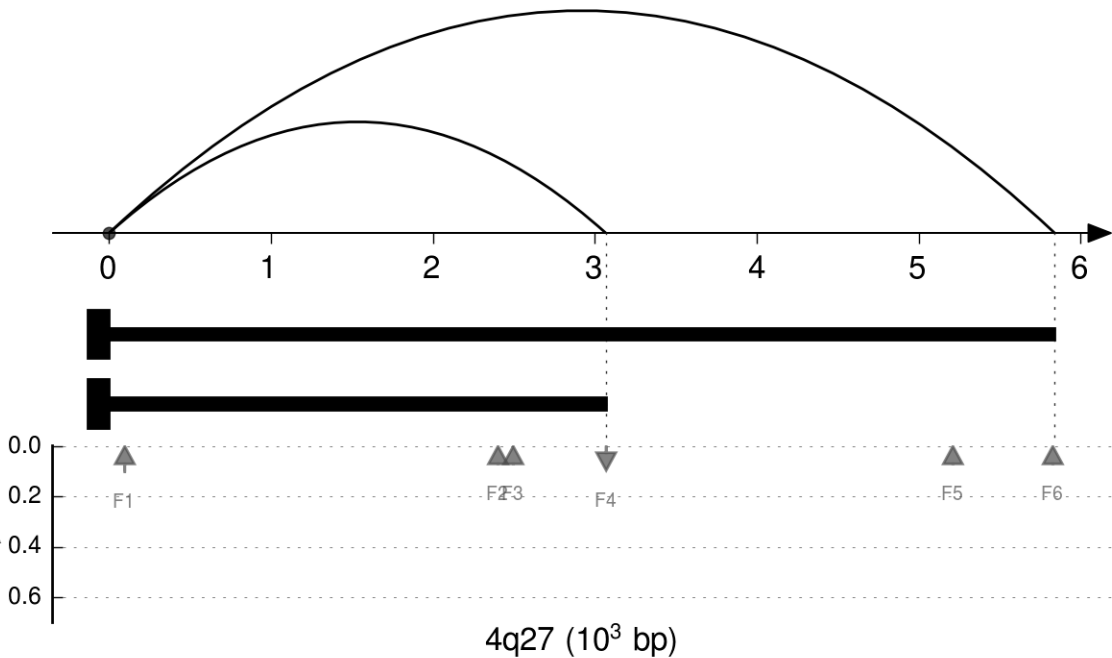

# FGFR2, COAD

**N: 41**  
**T: 311**

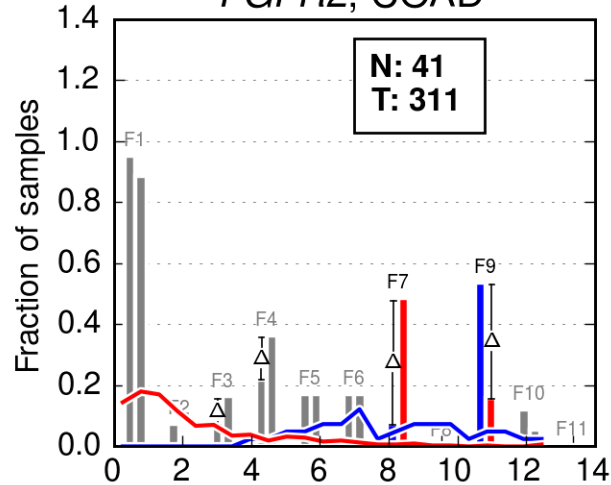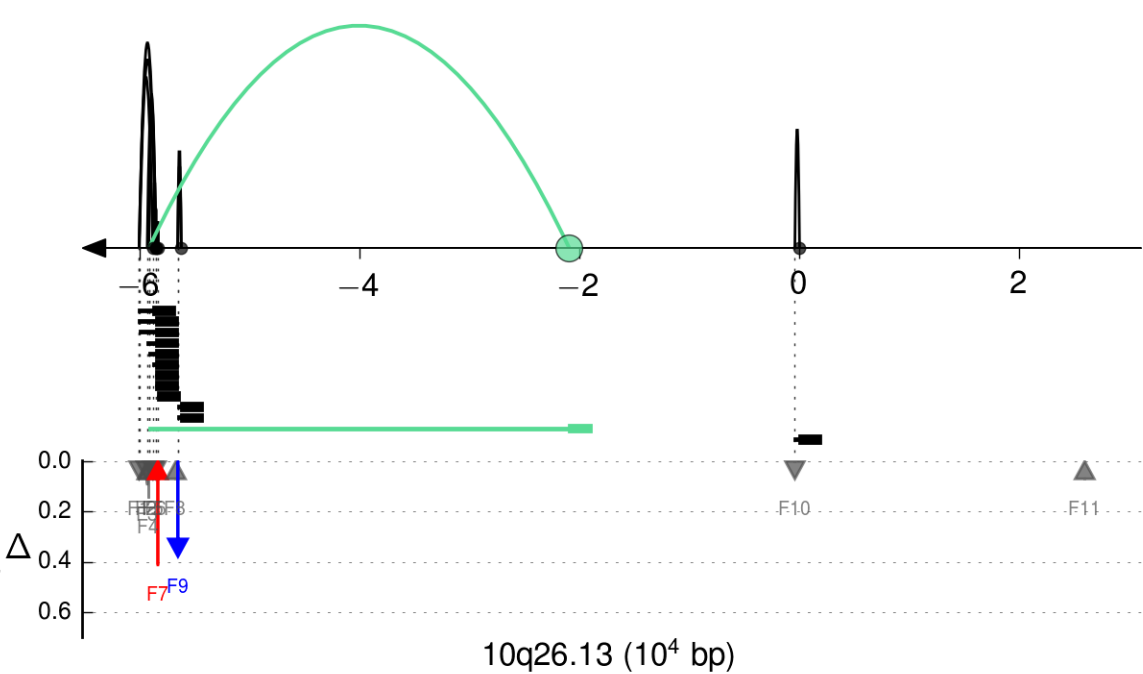

# FGFR2, KIRC

N: 71  
T: 538

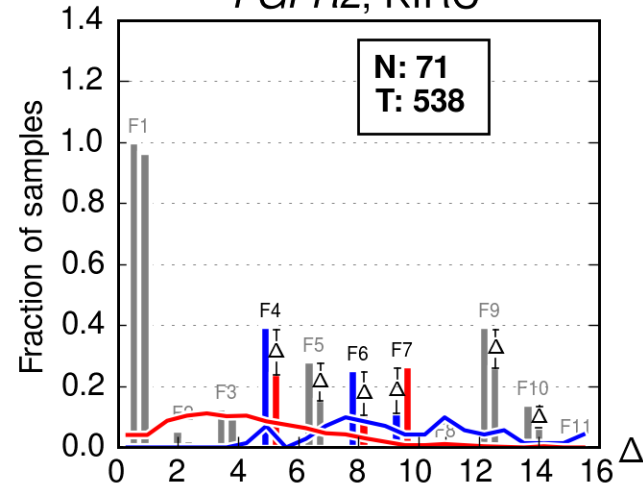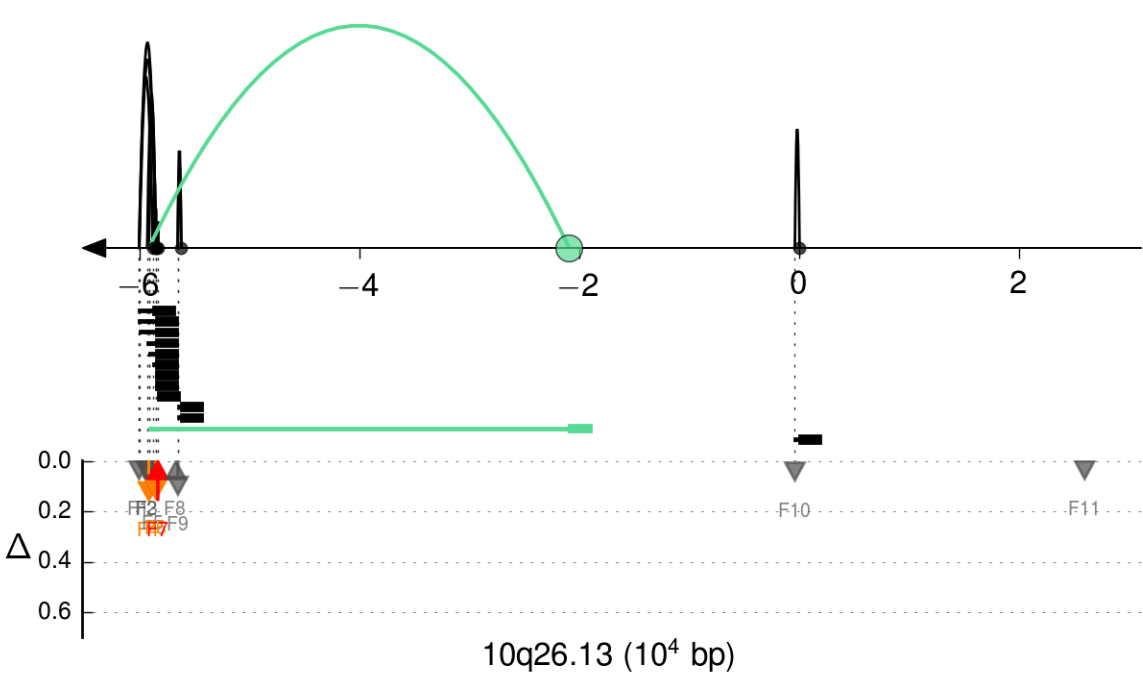

# FGFR2, LUAD

**N: 58**  
**T: 525**

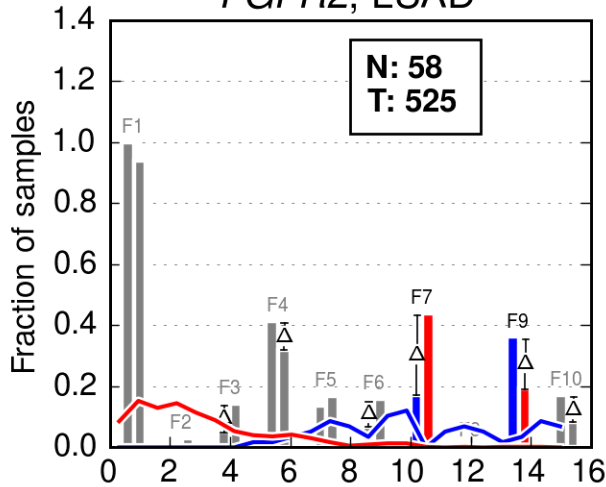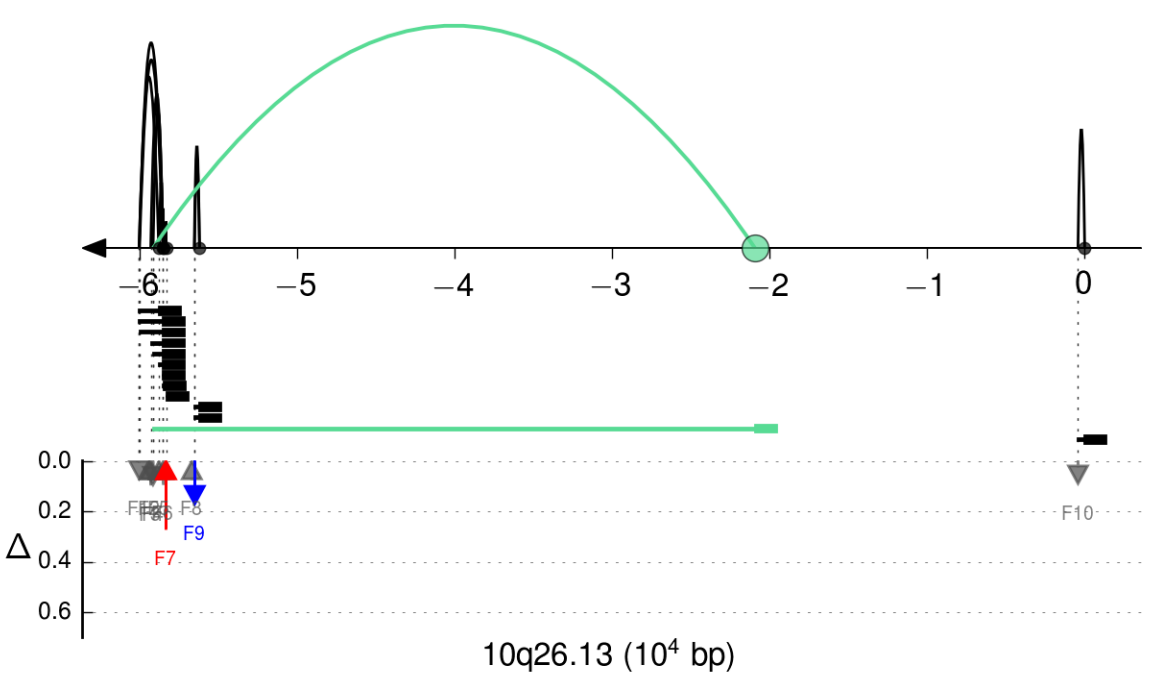

# FGFR2, PRAD

**N: 52**  
**T: 504**

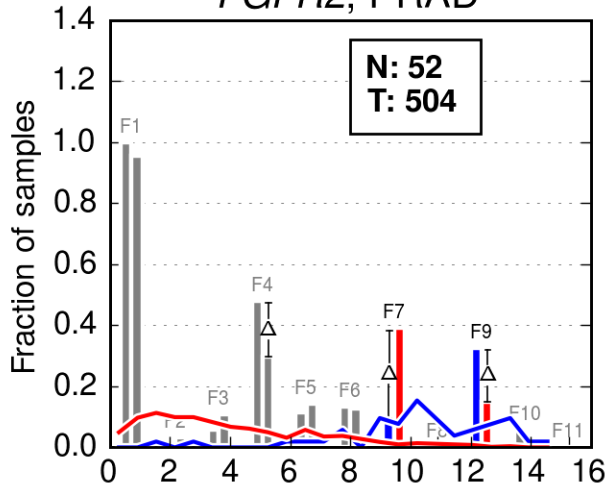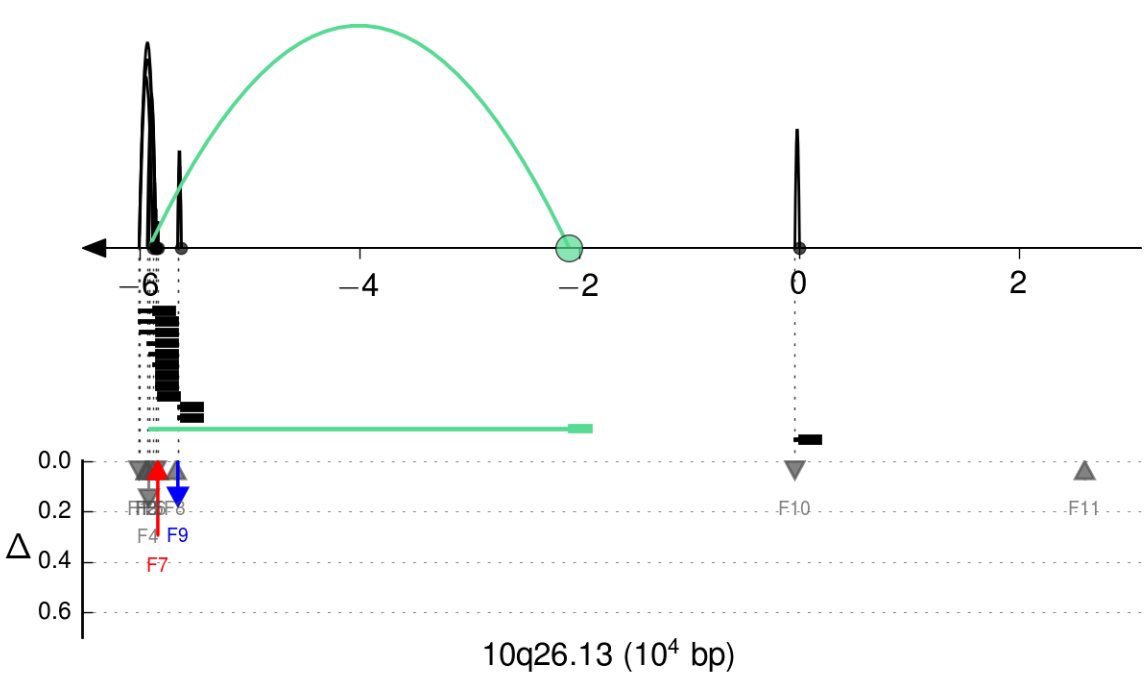

# FLT3, BRCA

N: 93  
T: 895

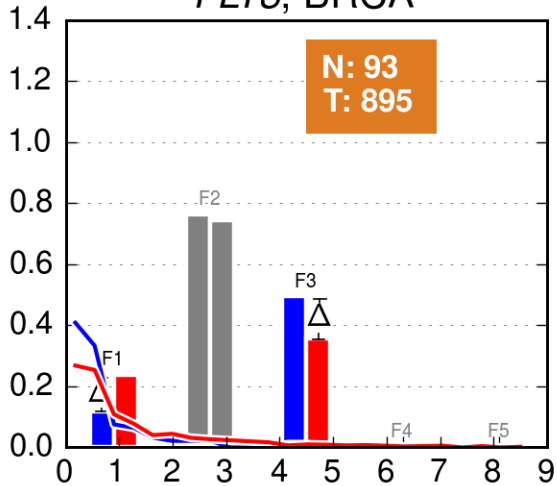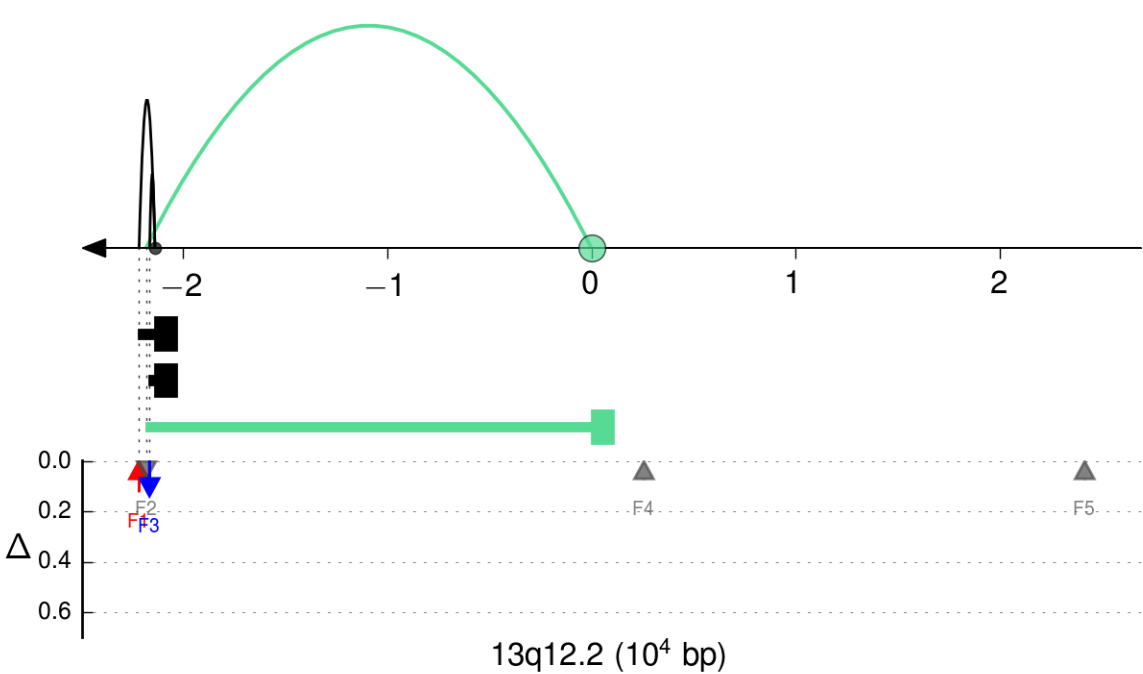

# FLT3, KICH

N: 15  
T: 19

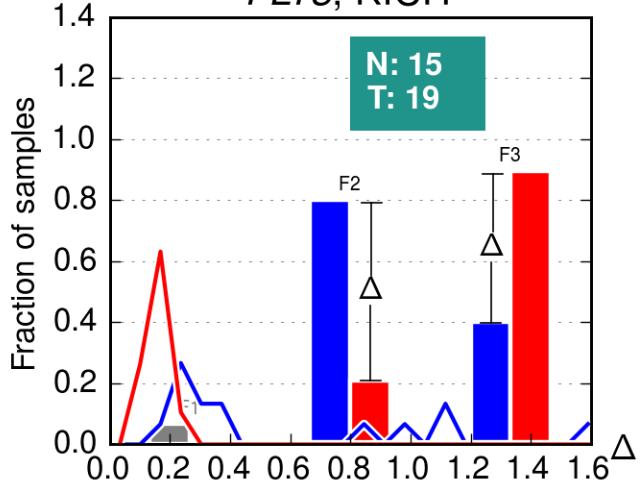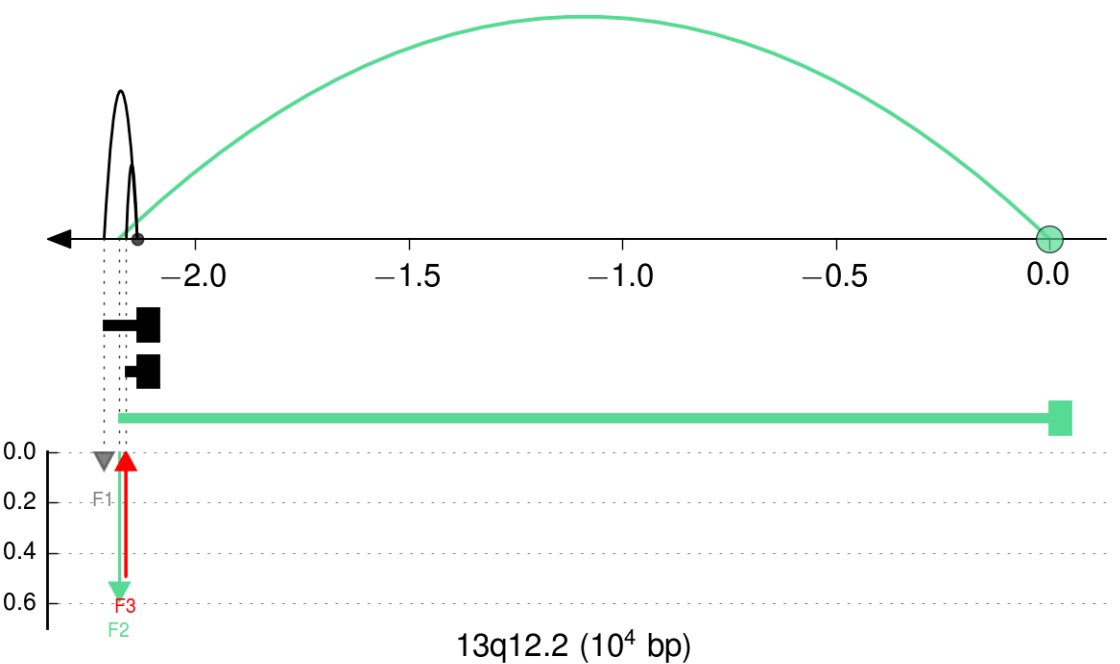

# GNAS, BRCA

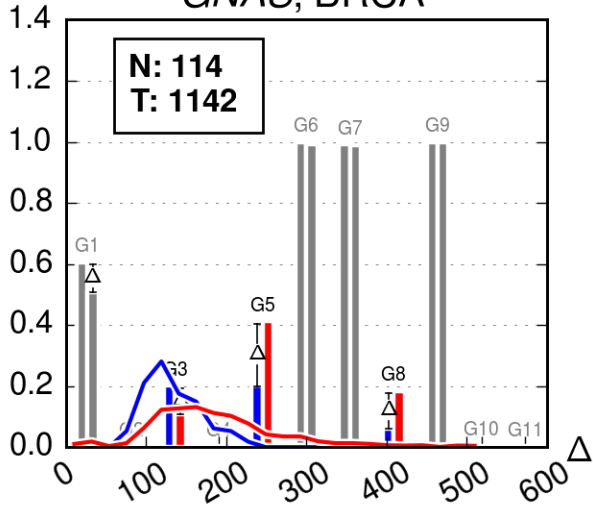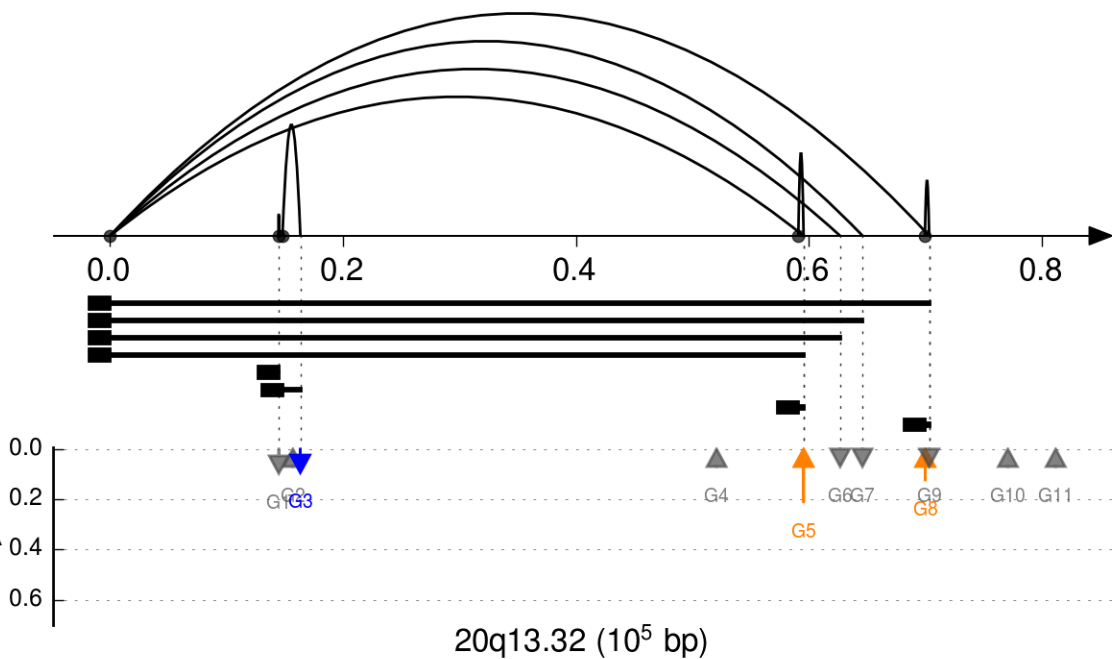

# GNAS, KICH

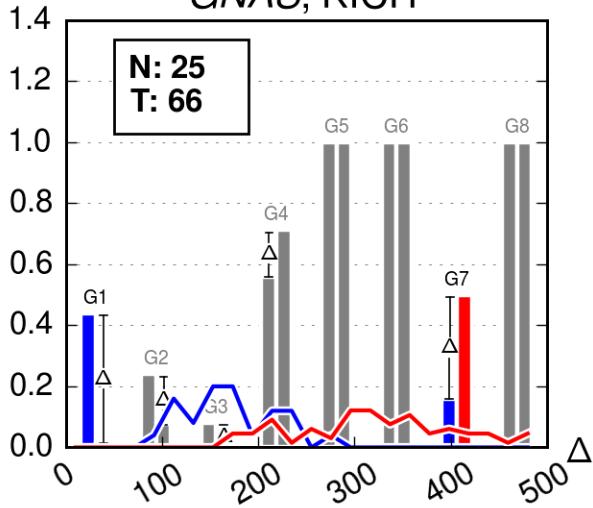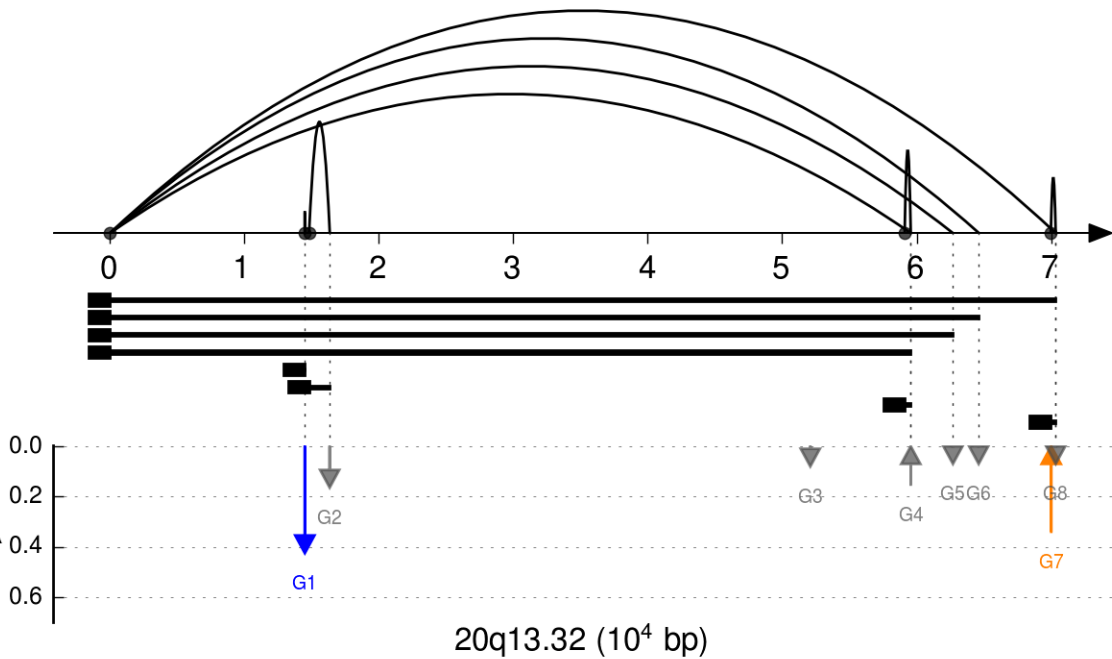

# HNF1A, COAD

N: 33  
T: 301

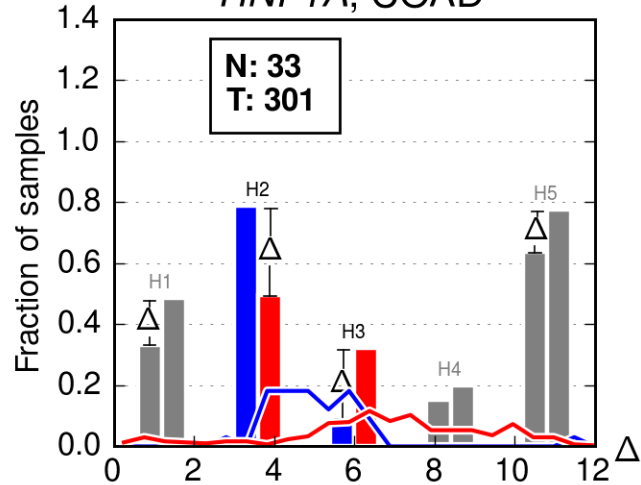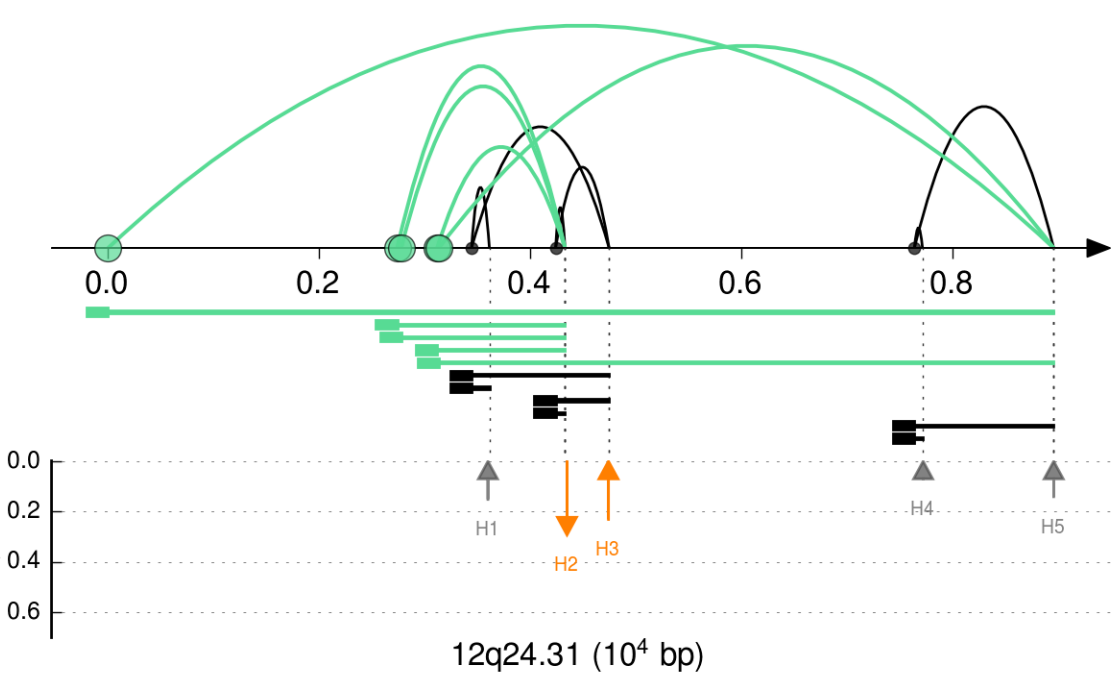

# HNF1A, LUAD

N: 31  
T: 306

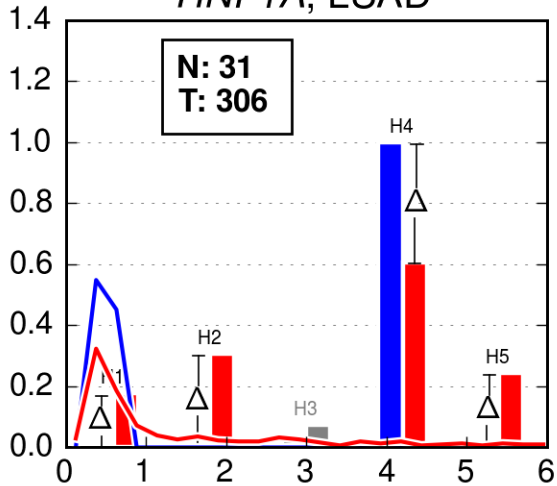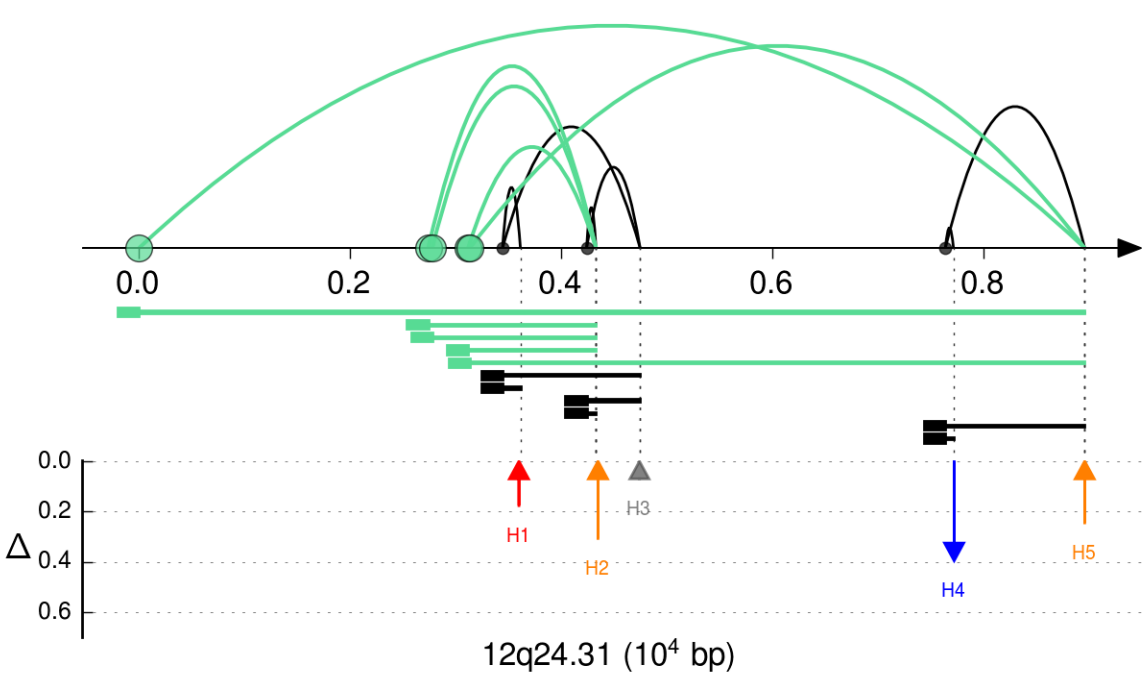

12q24.31 ( $10^4$  bp)

# *KIT, COAD*

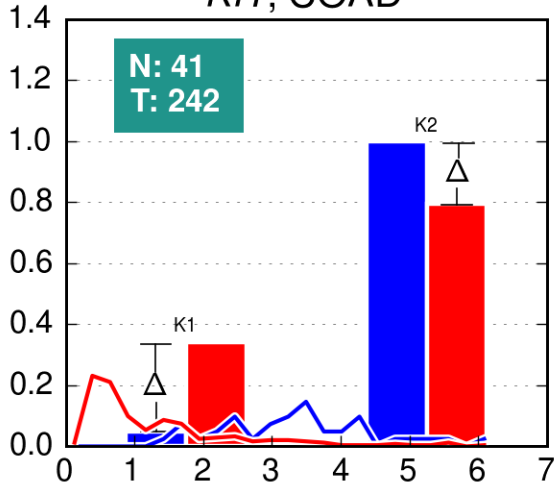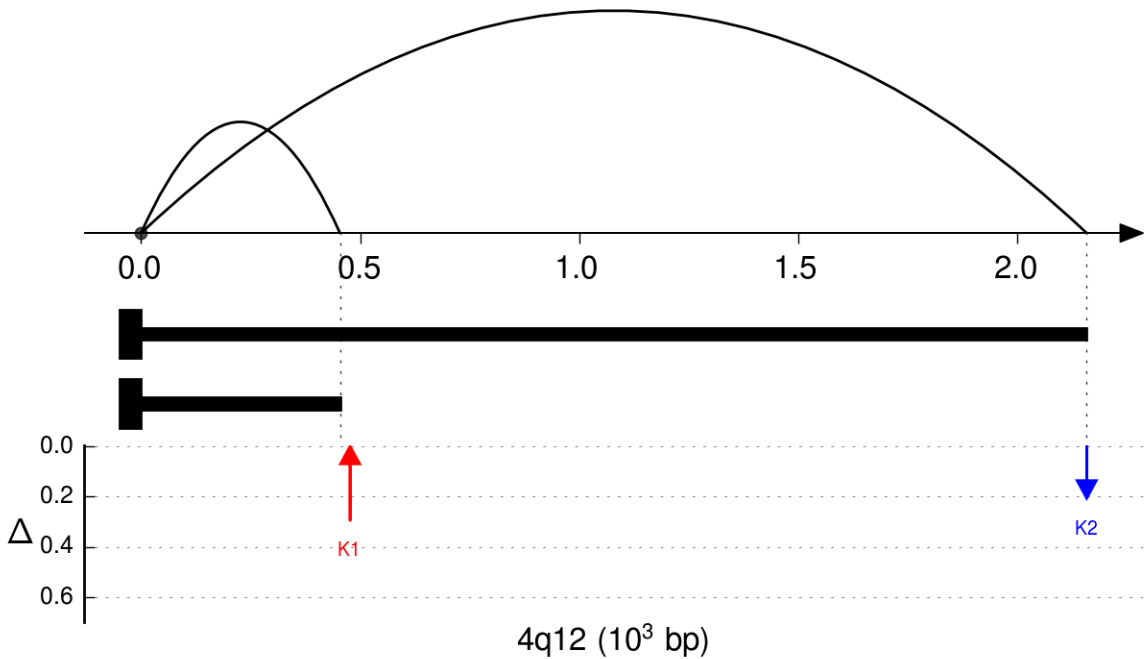

# KRAS, BRCA

N: 64  
T: 955

Fraction of samples

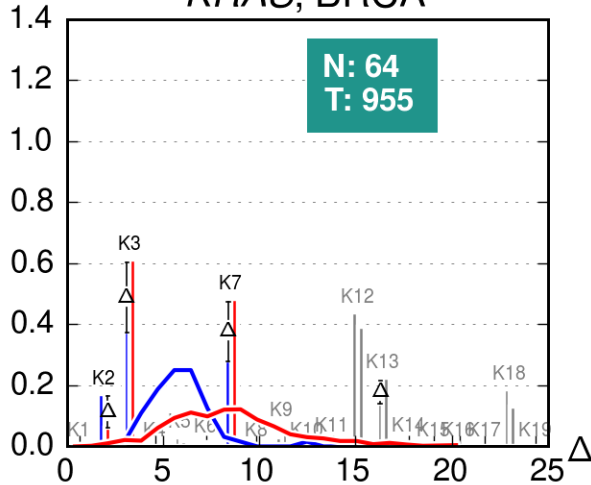

$\Delta$

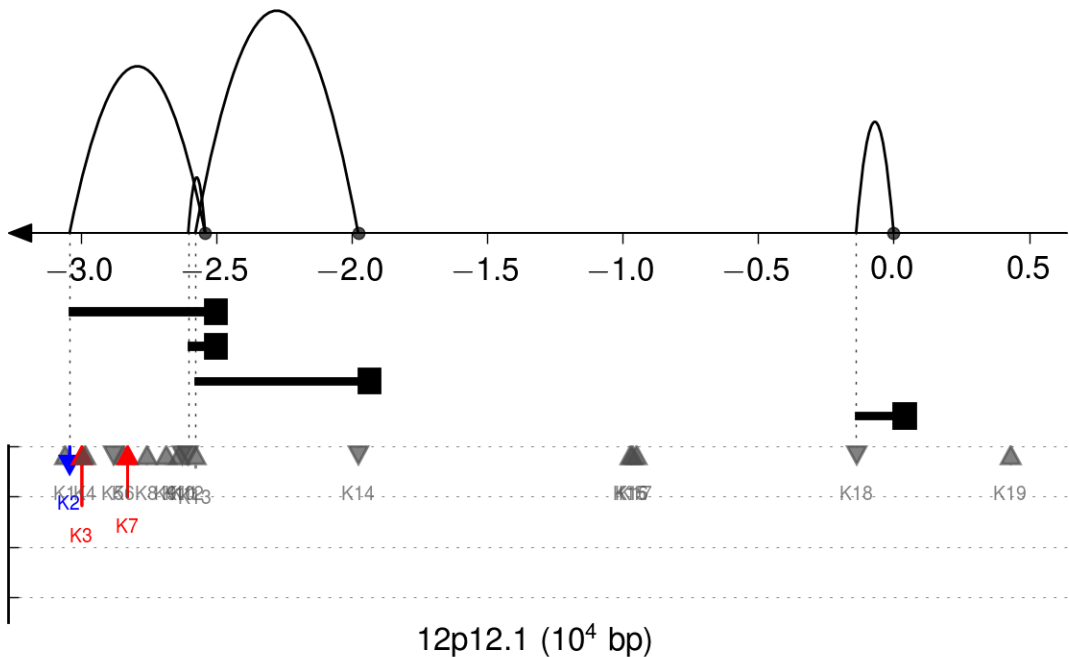

12p12.1 (10<sup>4</sup> bp)

# KRAS, PRAD

N: 49  
T: 449

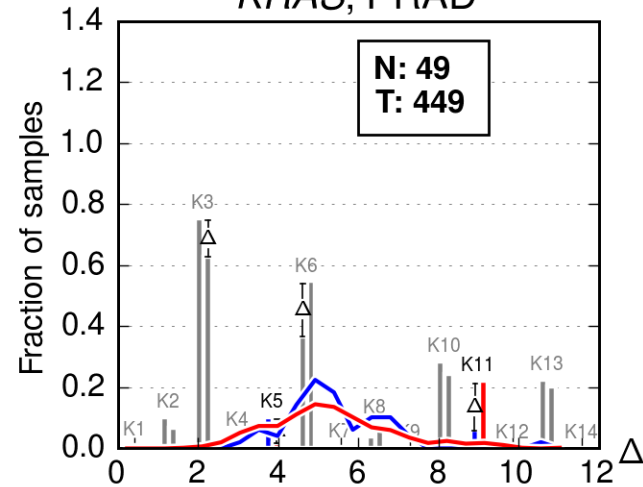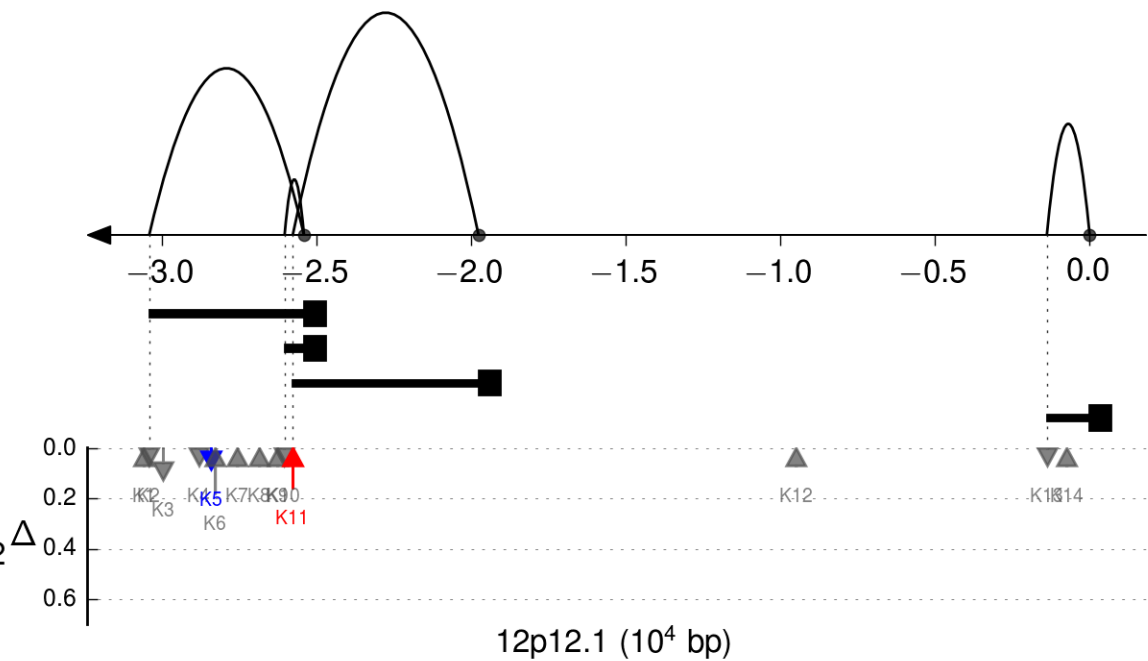

# MAX, BRCA

N: 114  
T: 1142

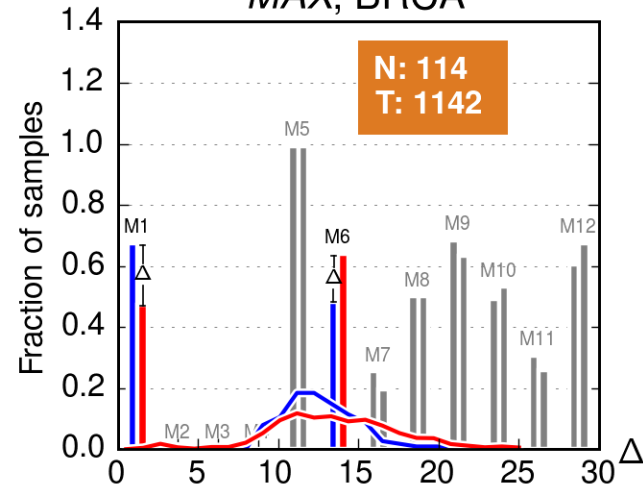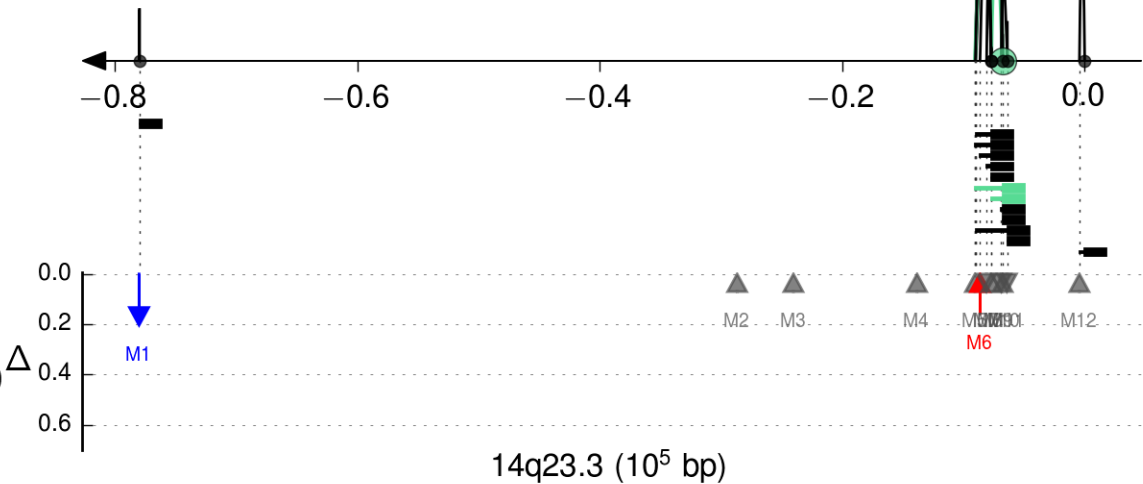

# MAX, LUAD

N: 58  
T: 528

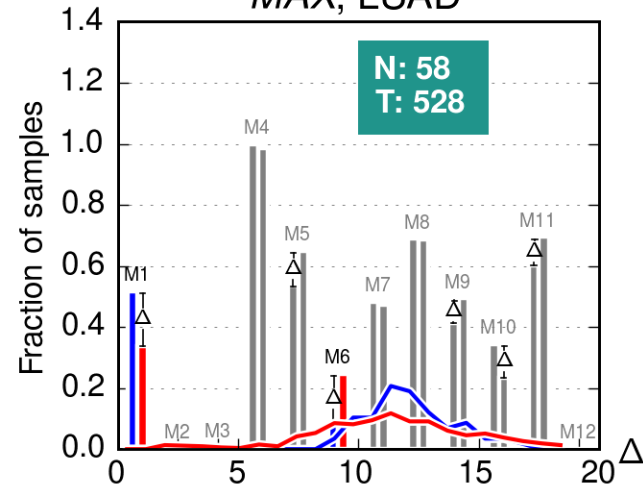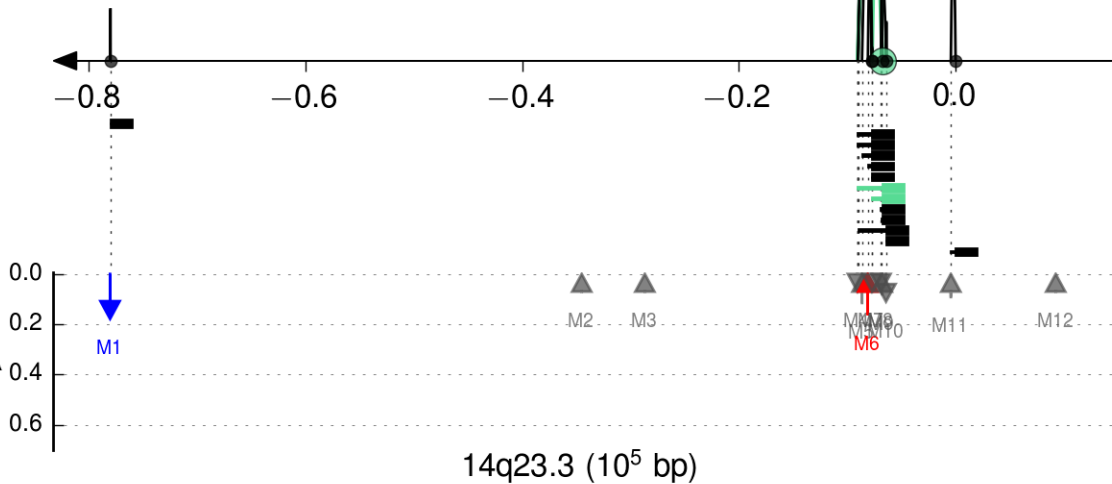

# MDM4, LUSC

N: 50  
T: 491

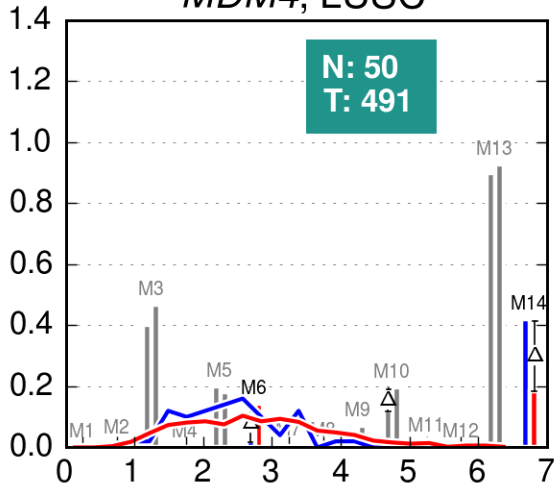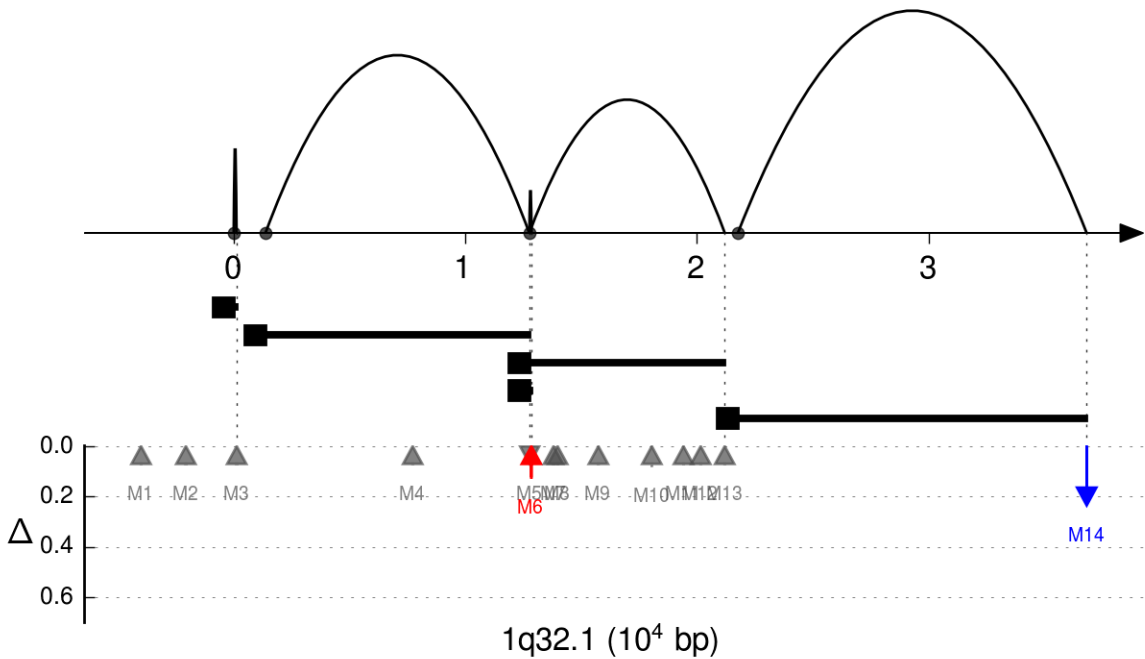

# MET, BRCA

**N: 112**  
**T: 1103**

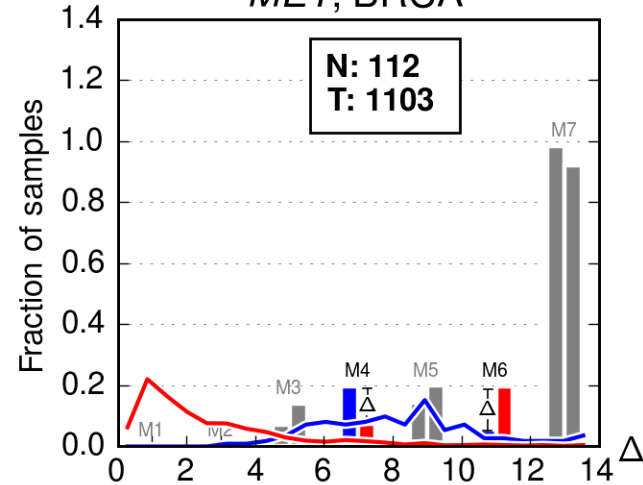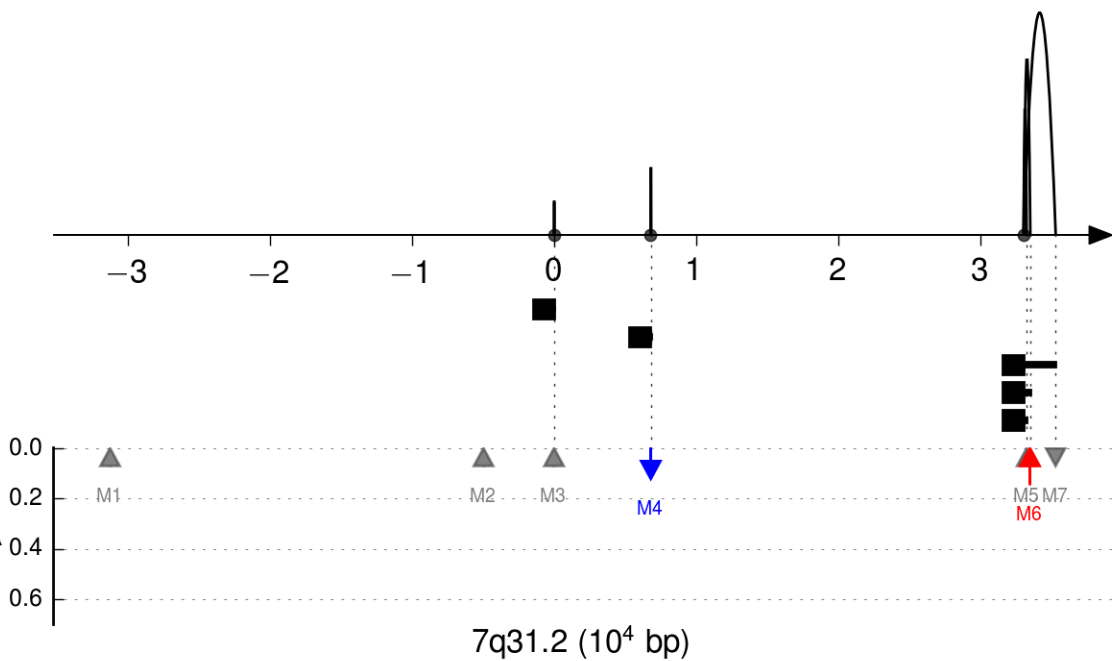

# MITF, BRCA

N: 114  
T: 1138

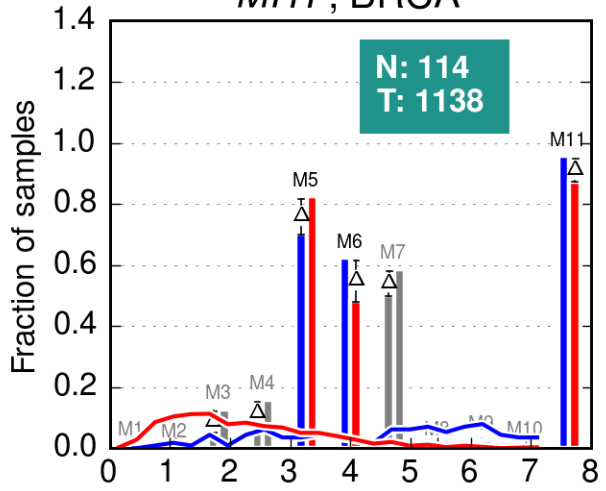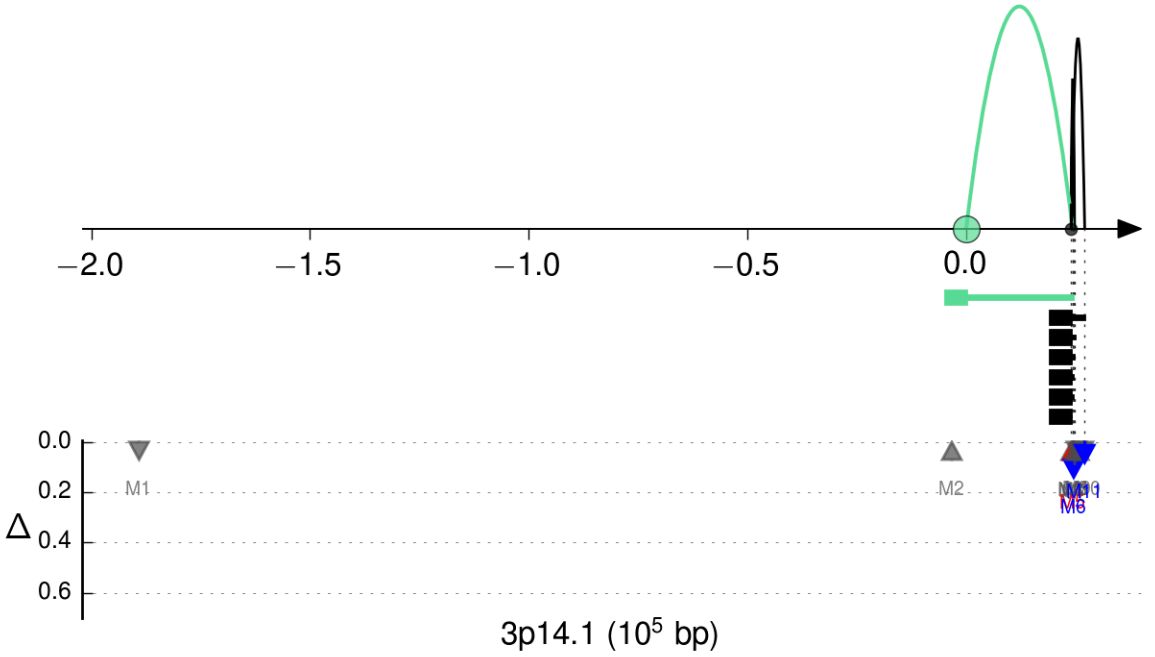

# MITF, LUSC

N: 51  
T: 504

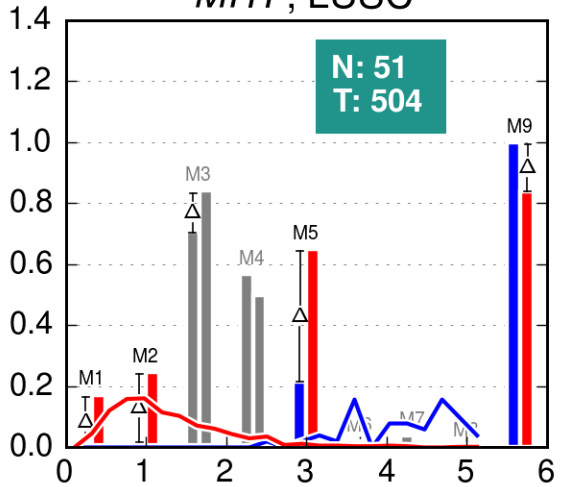

$\Delta$

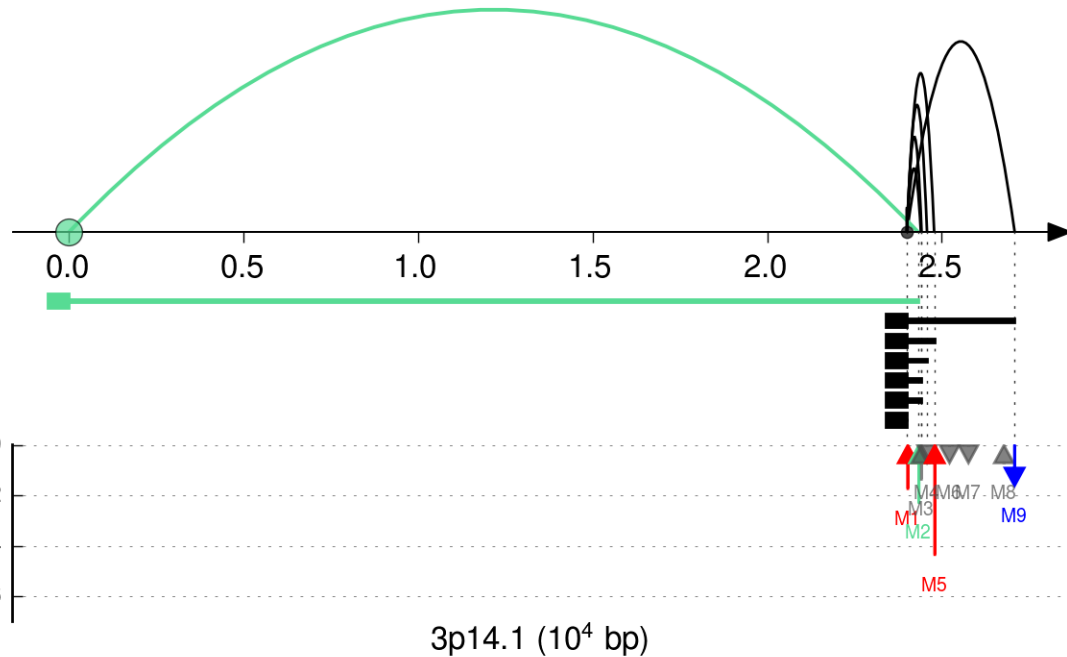

*MITF*, UCEC

N: 24  
T: 185

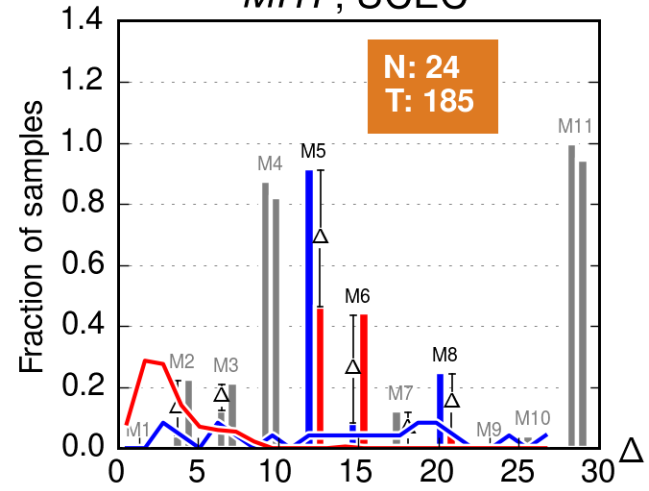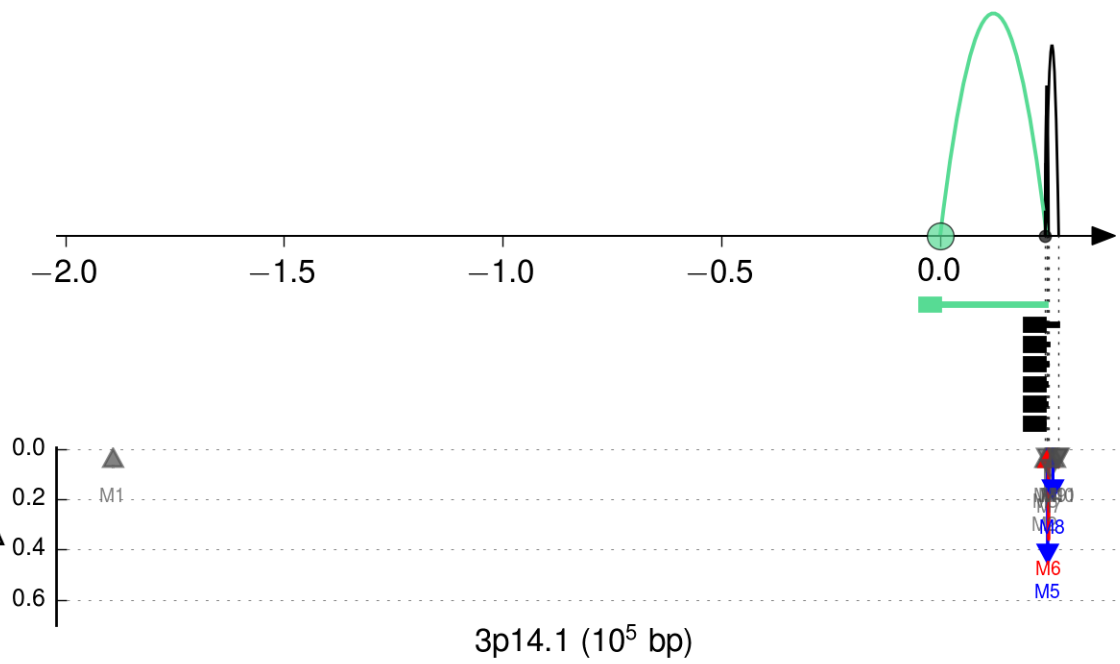

# MYCL, KICH

N: 17  
T: 47

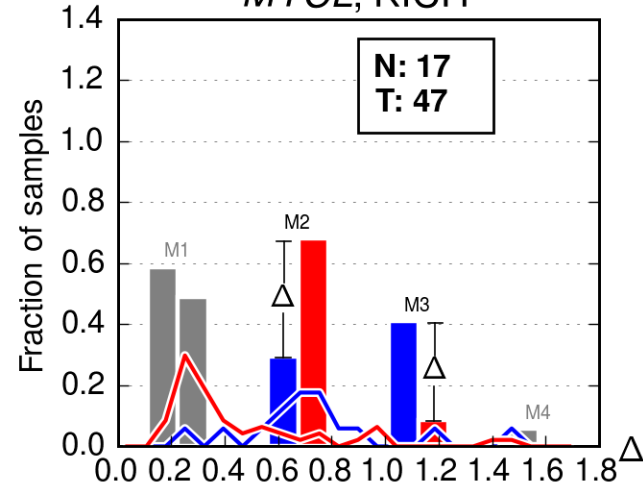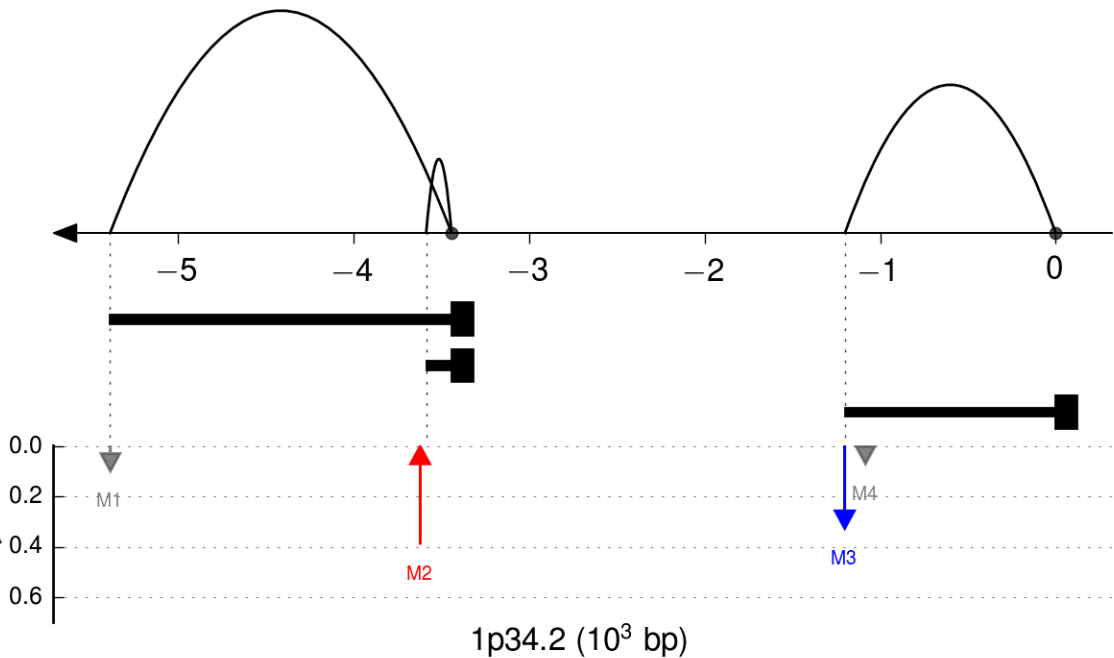

# NF1, BRCA

**N: 114**  
**T: 1139**

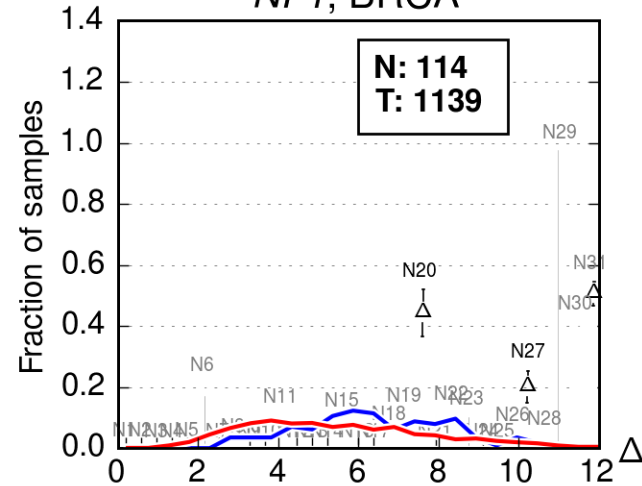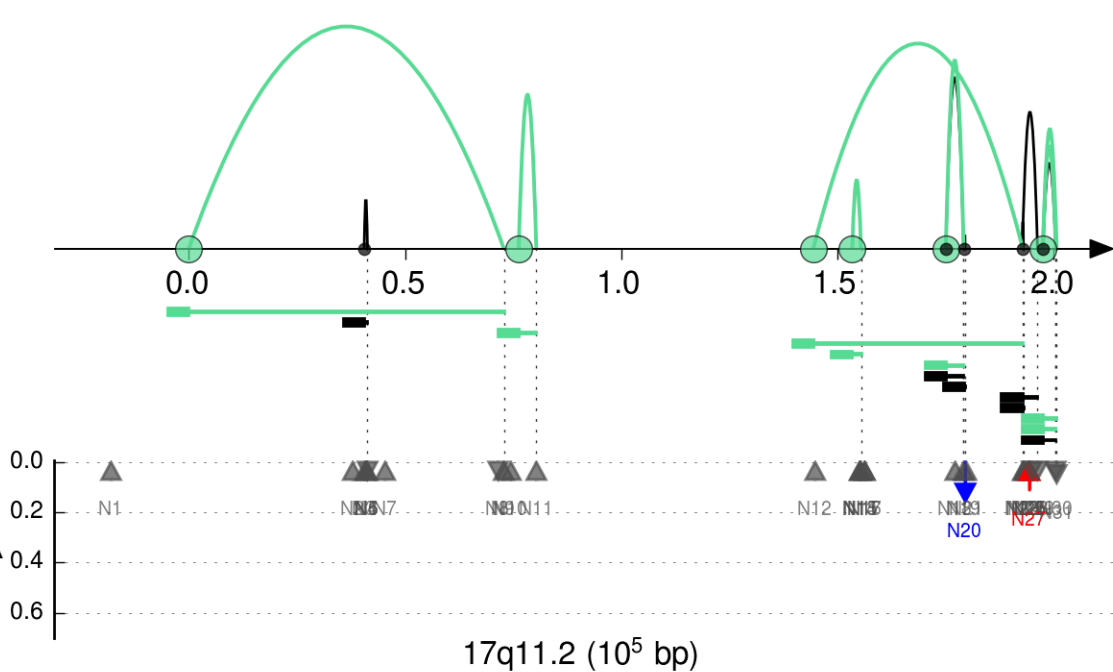

# *NFE2L2*, BRCA

**N: 114**  
**T: 1132**

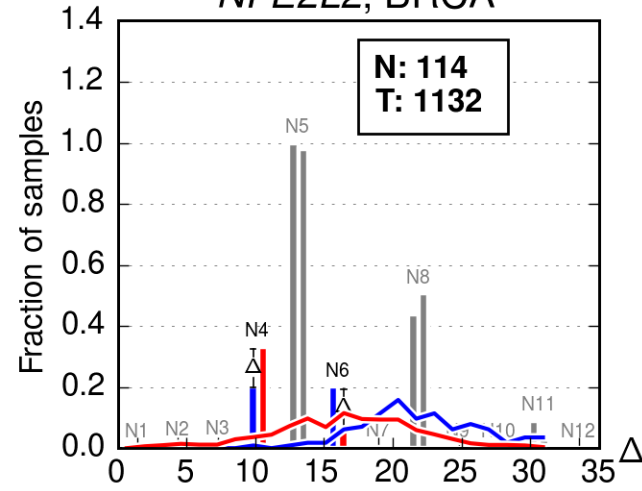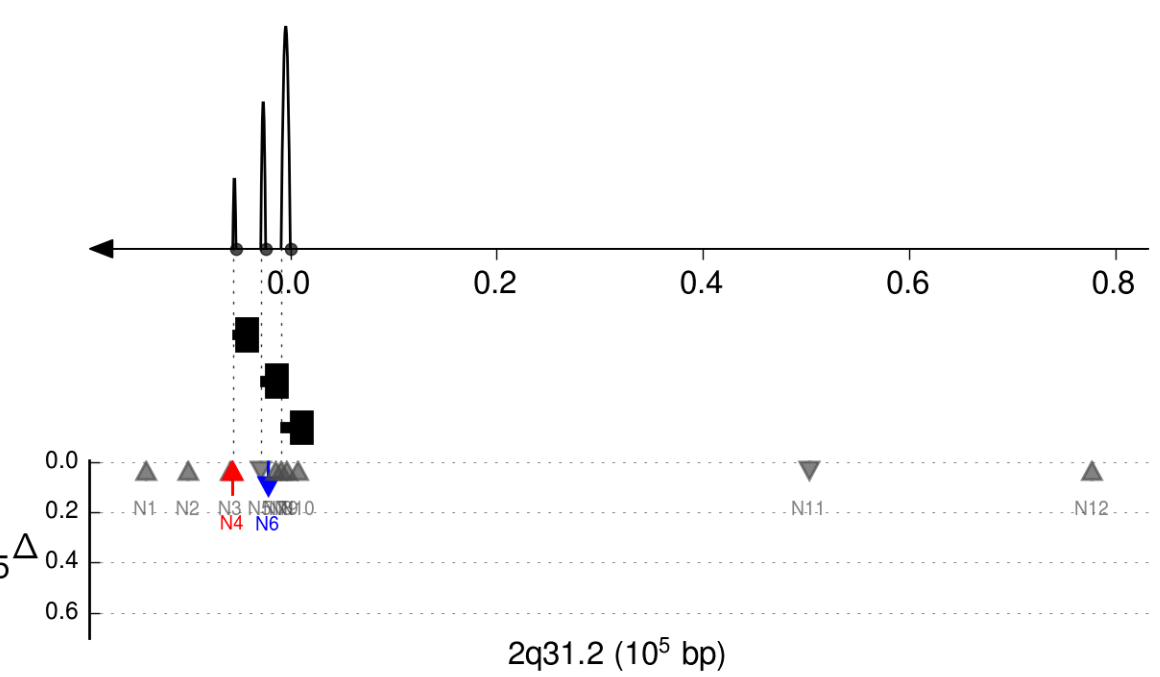

# *NFE2L2*, KIRC

**N: 72**  
**T: 534**

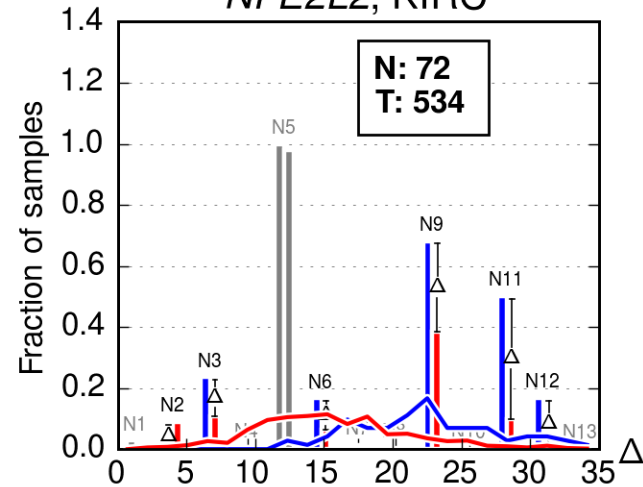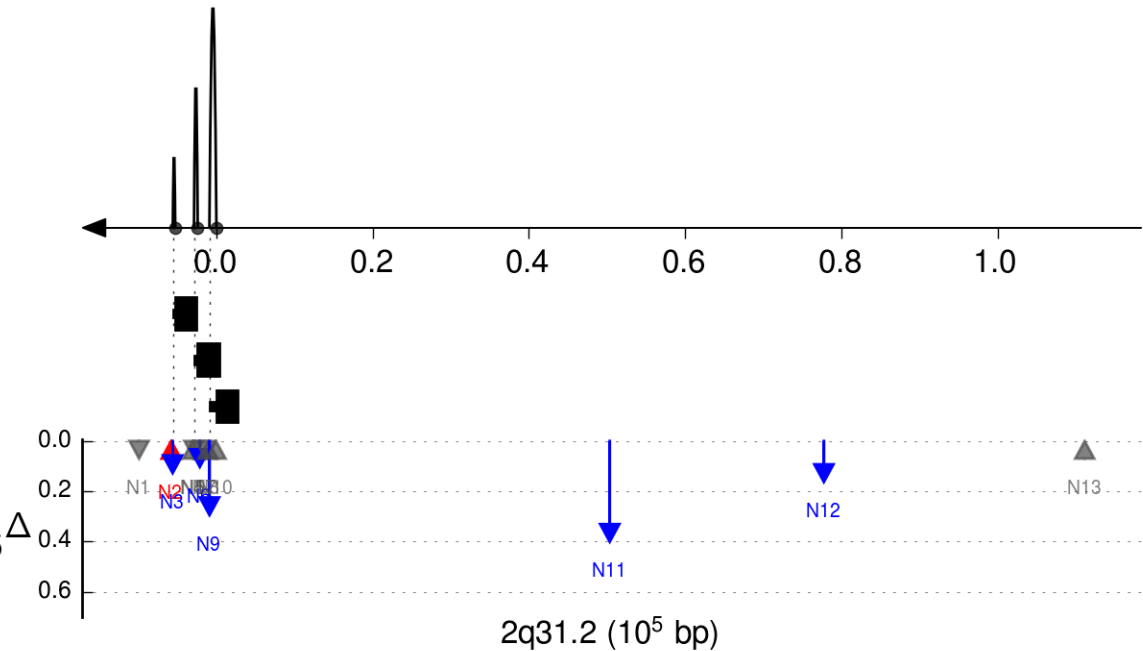

# *NFE2L2*, THCA

**N: 59**  
**T: 512**

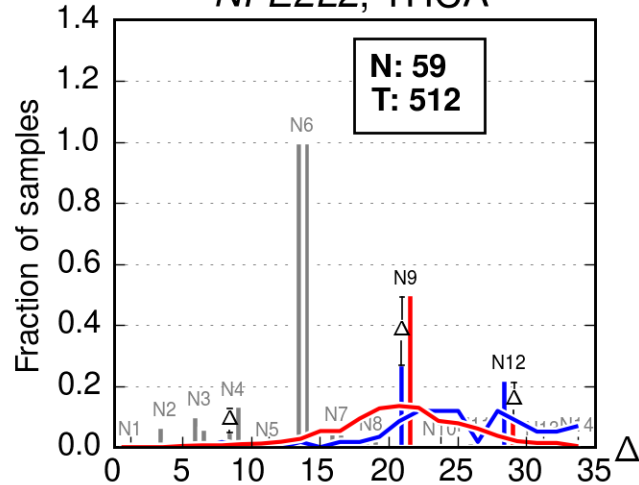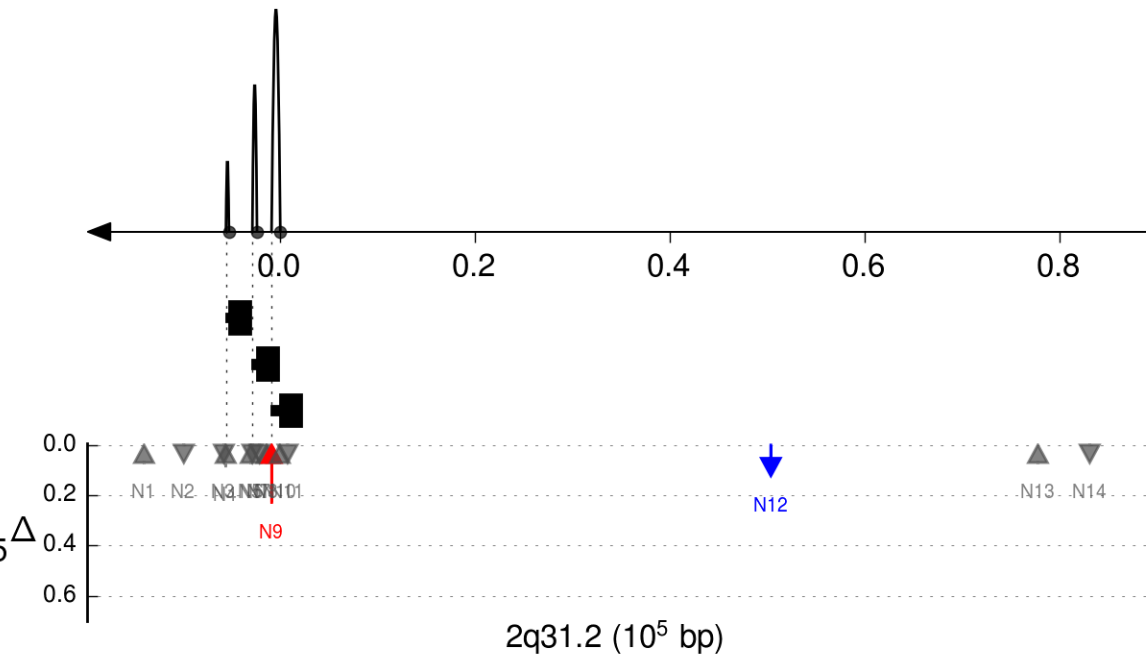

# *NFE2L3*, KIRC

**N: 54**  
**T: 371**

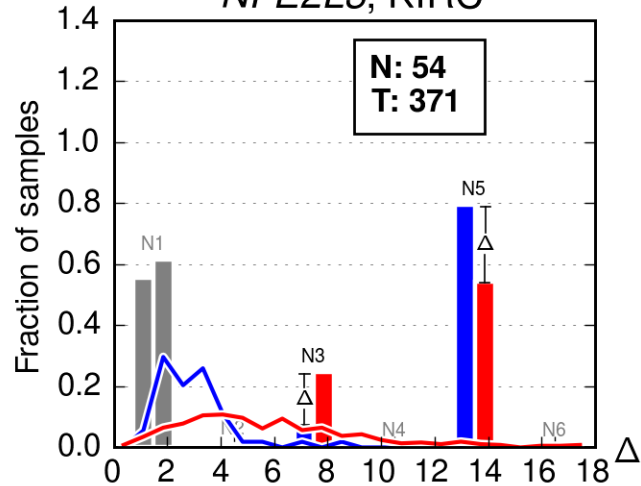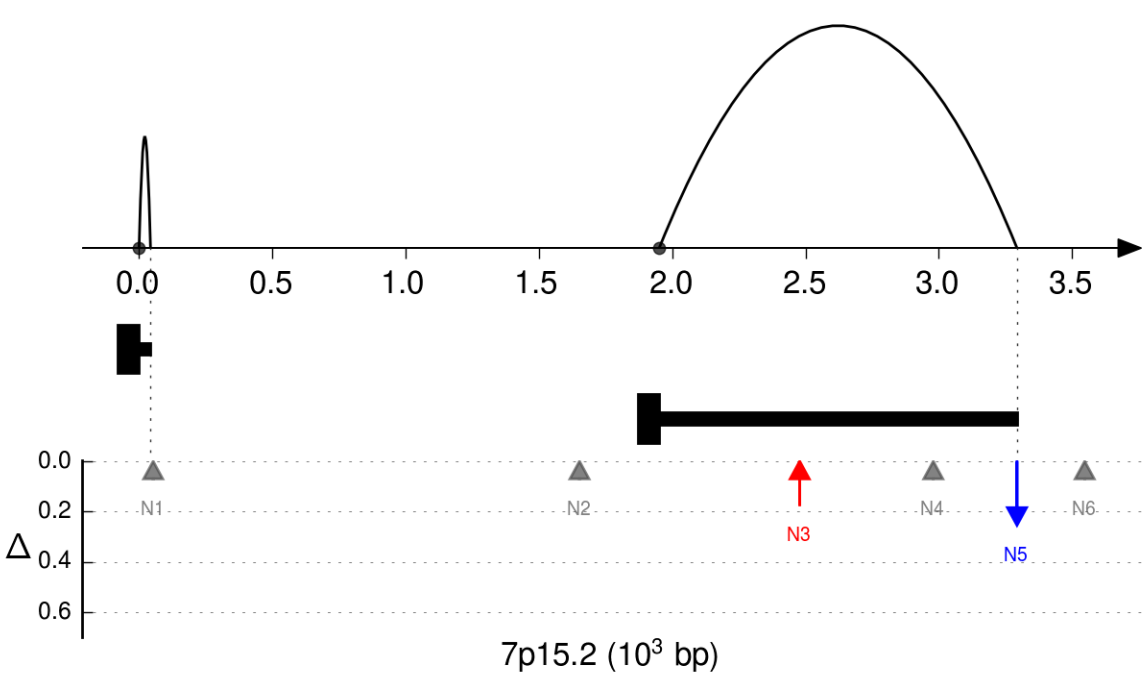

# *PTCH1*, BRCA

N: 97  
T: 1057

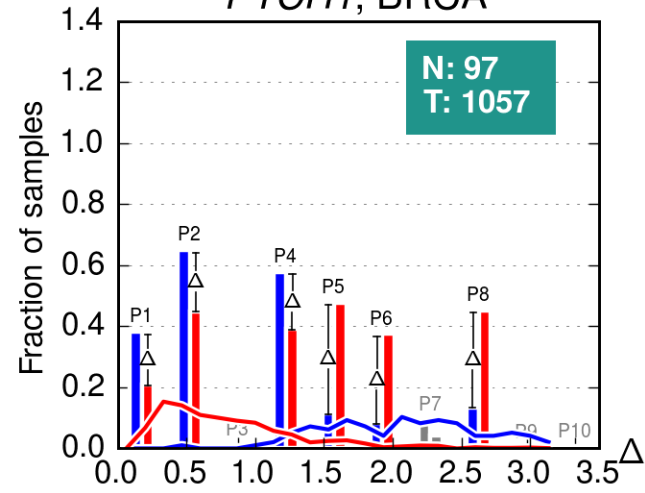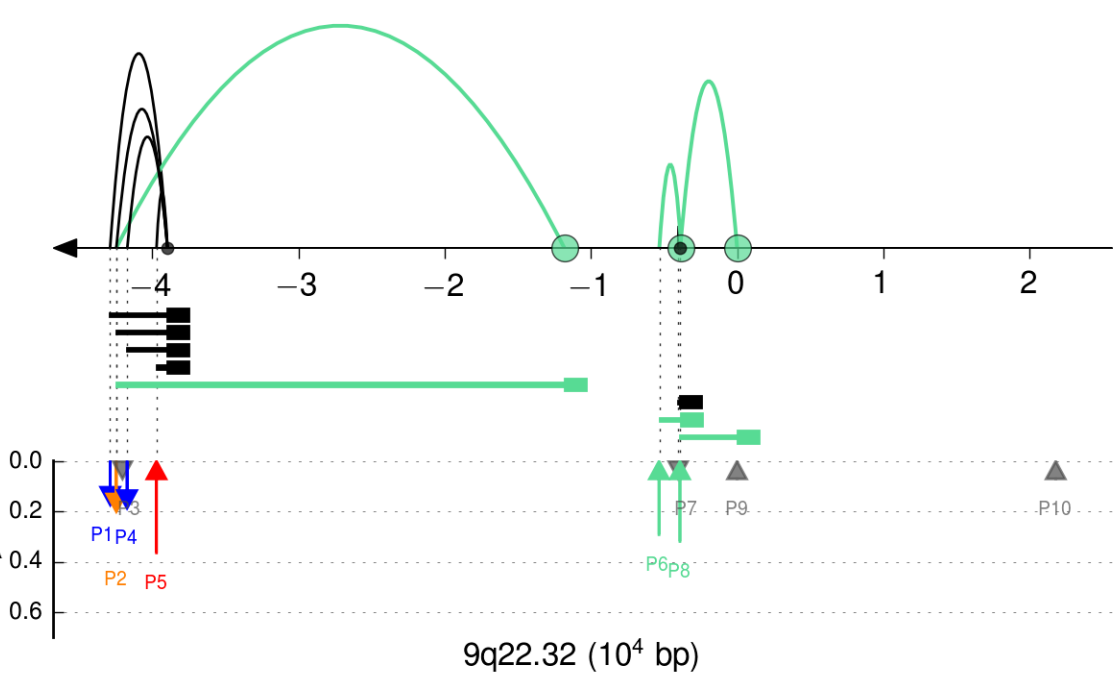

# RB1, BRCA

N: 102  
T: 928

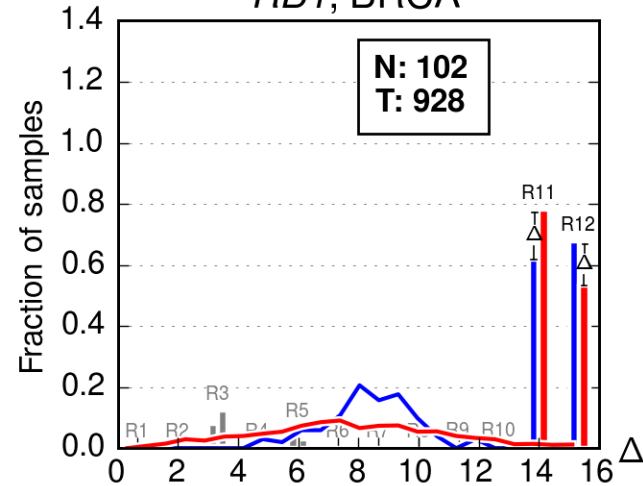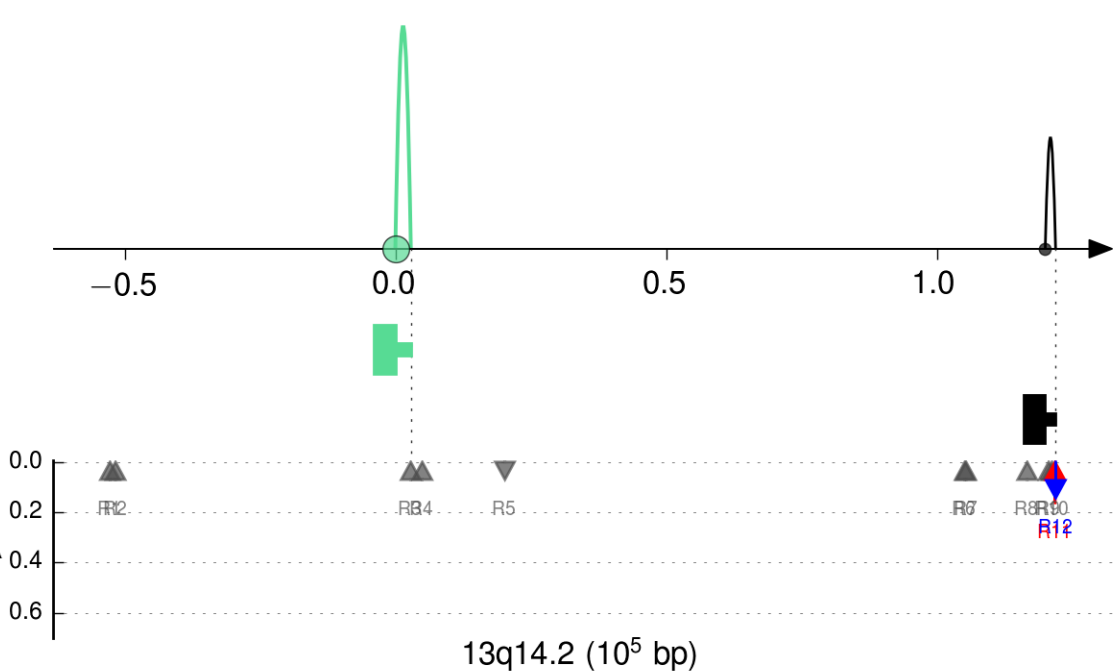

# RNF43, KIRC

N: 61  
T: 367

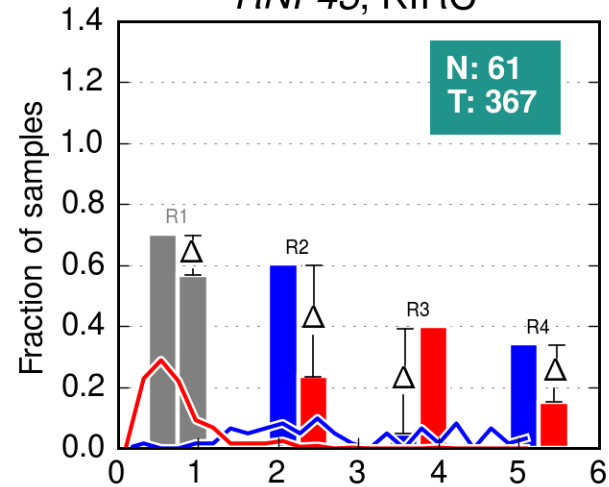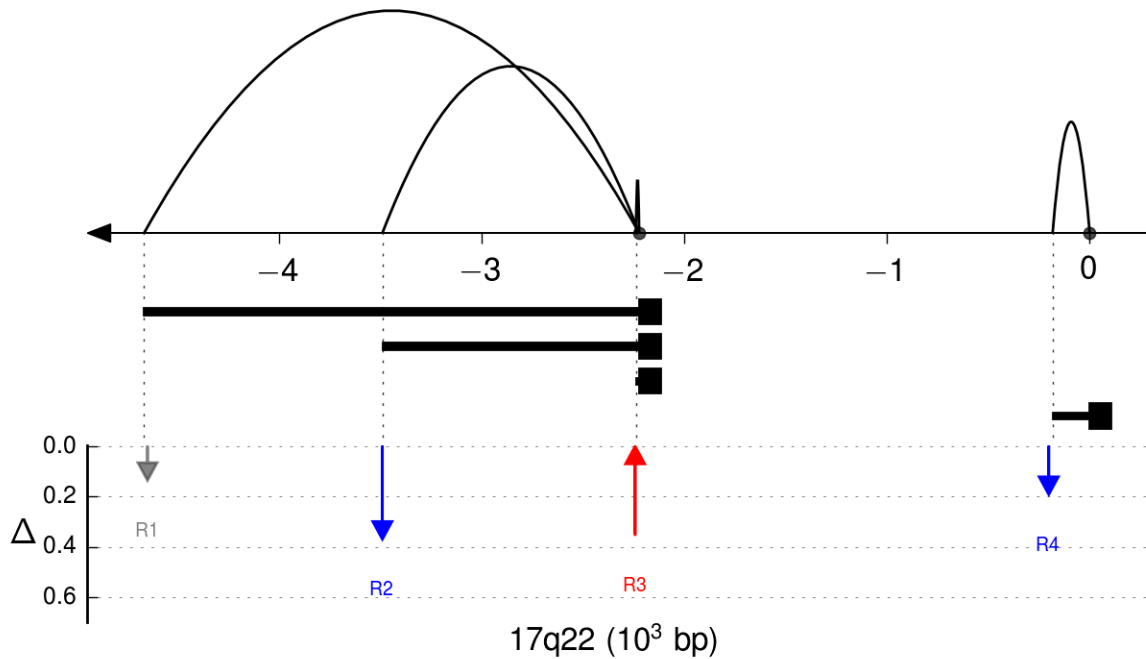

# RNF43, UCEC

N: 17  
T: 169

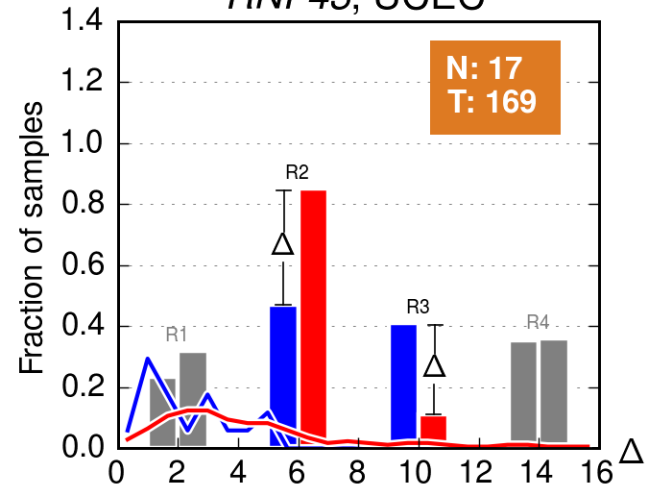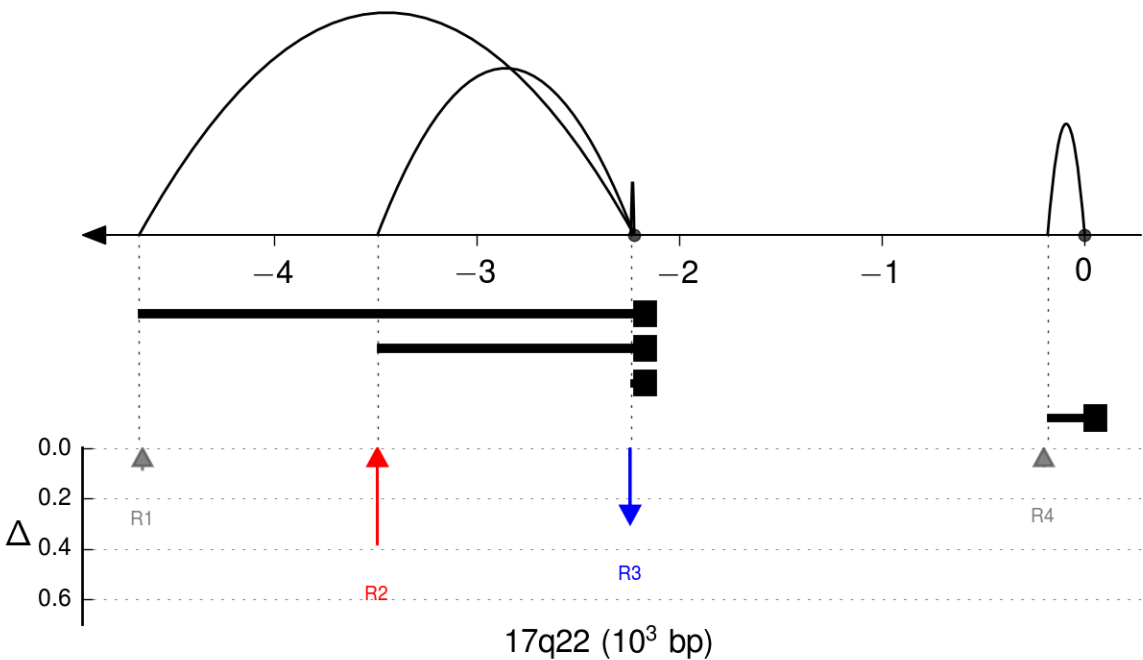

# SOX2, BRCA

N: 29  
T: 424

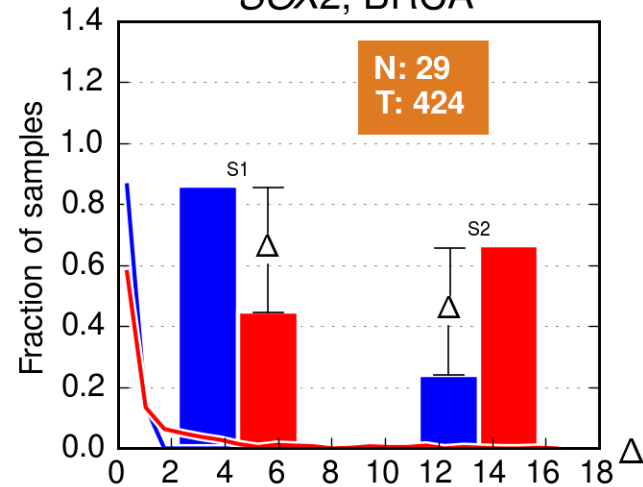

$\Delta$

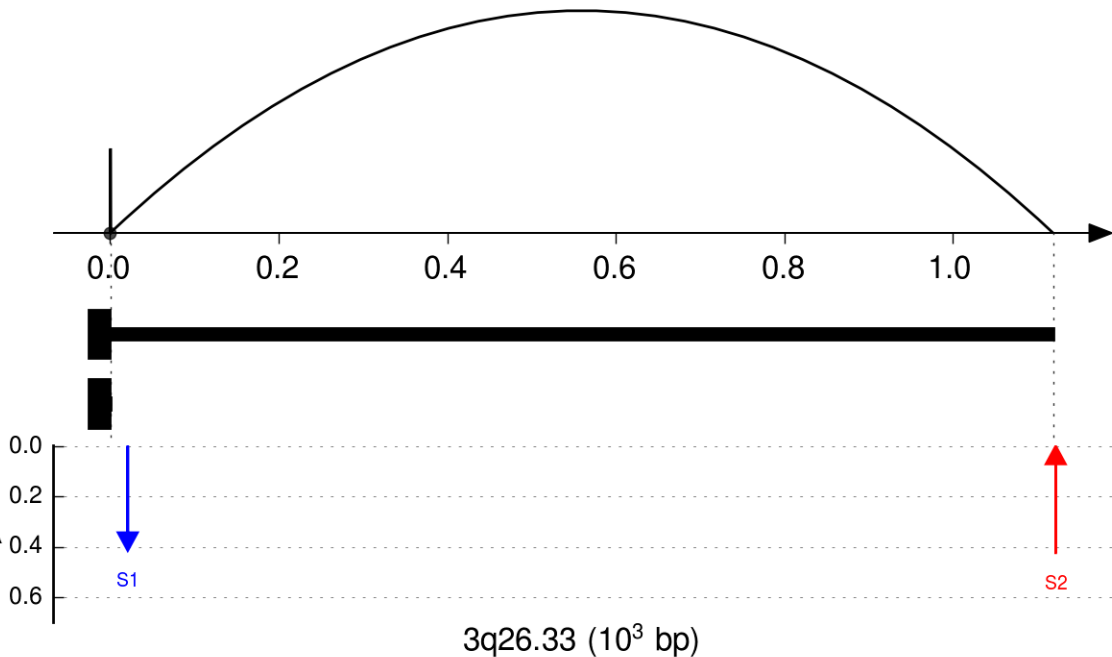





# WT1, KICH

N: 23  
T: 8

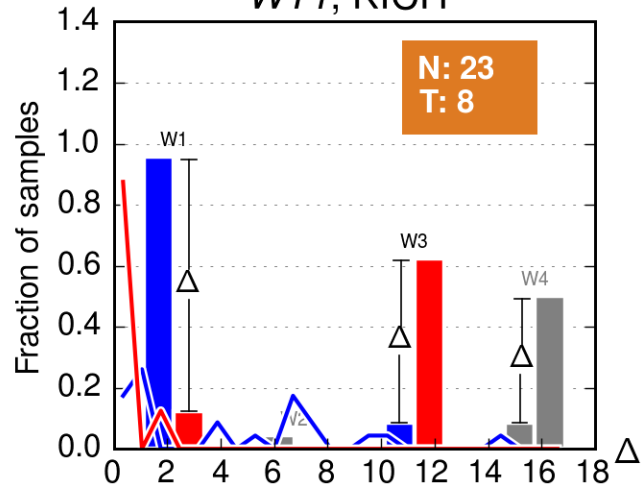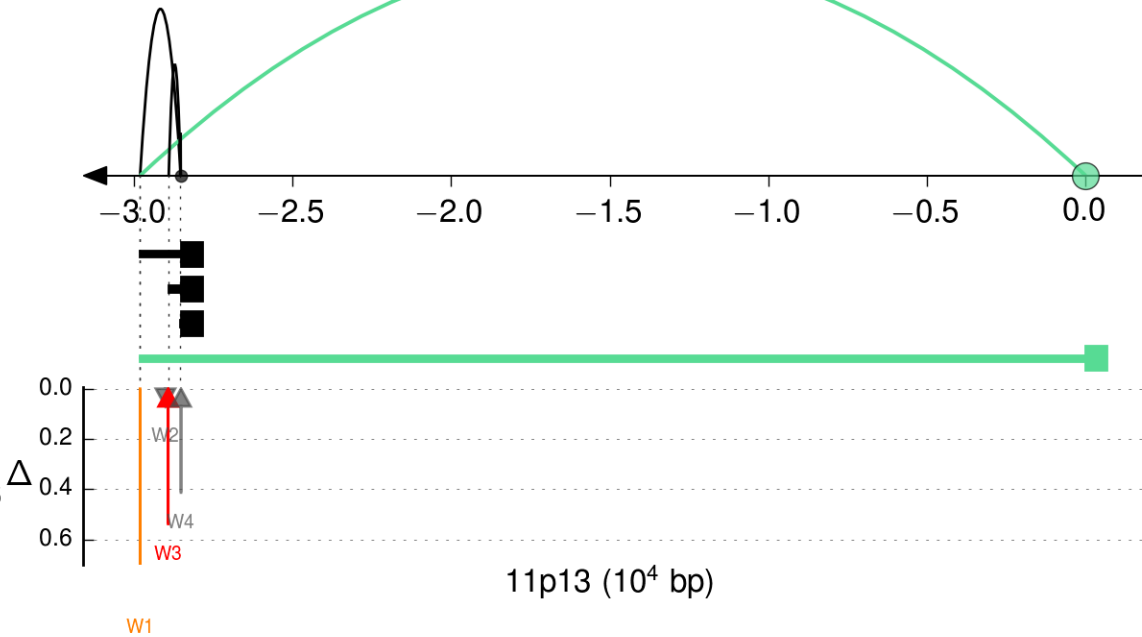

# WT1, KIRC

N: 62  
T: 352

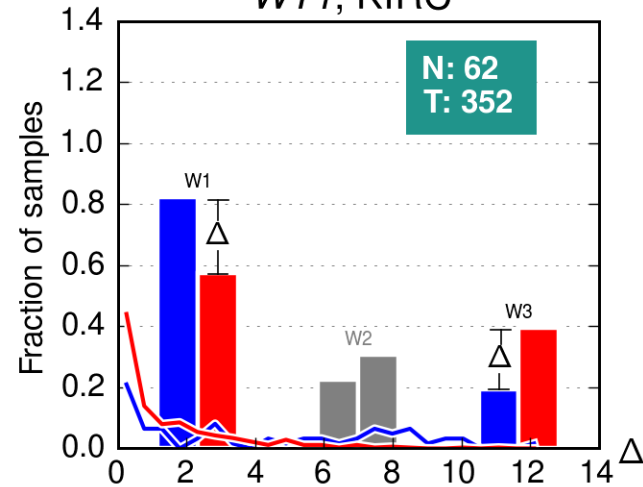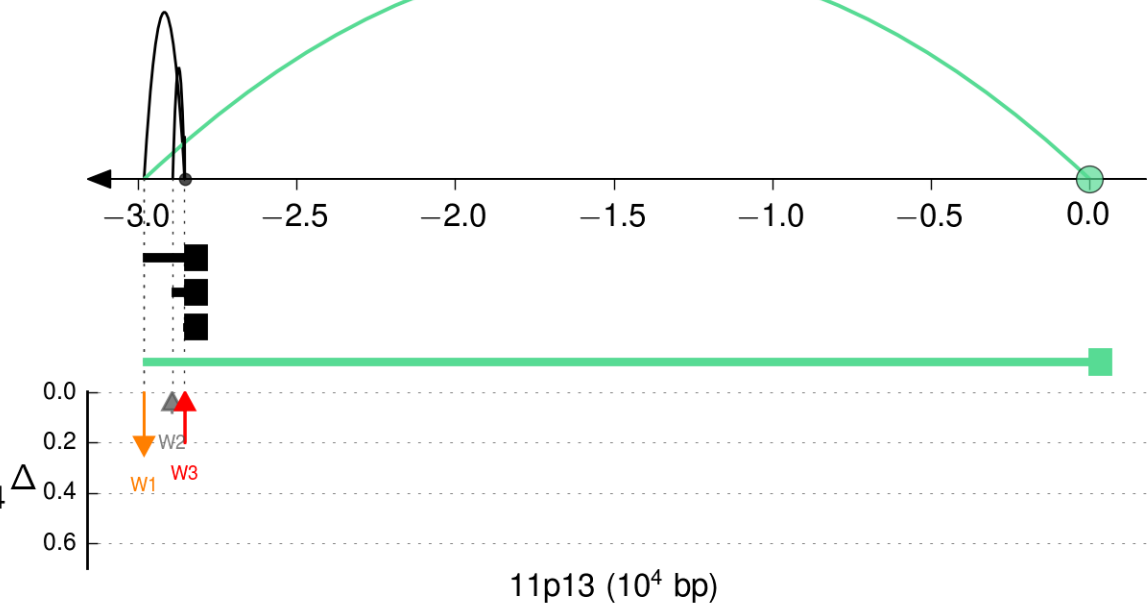

# WT1, KIRP

N: 31  
T: 142

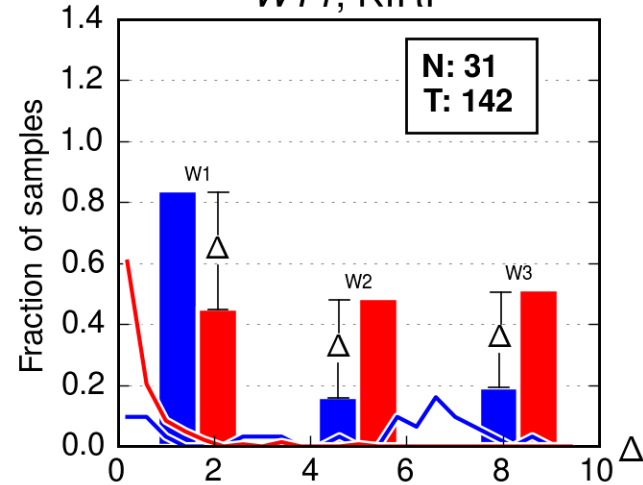

$\Delta$

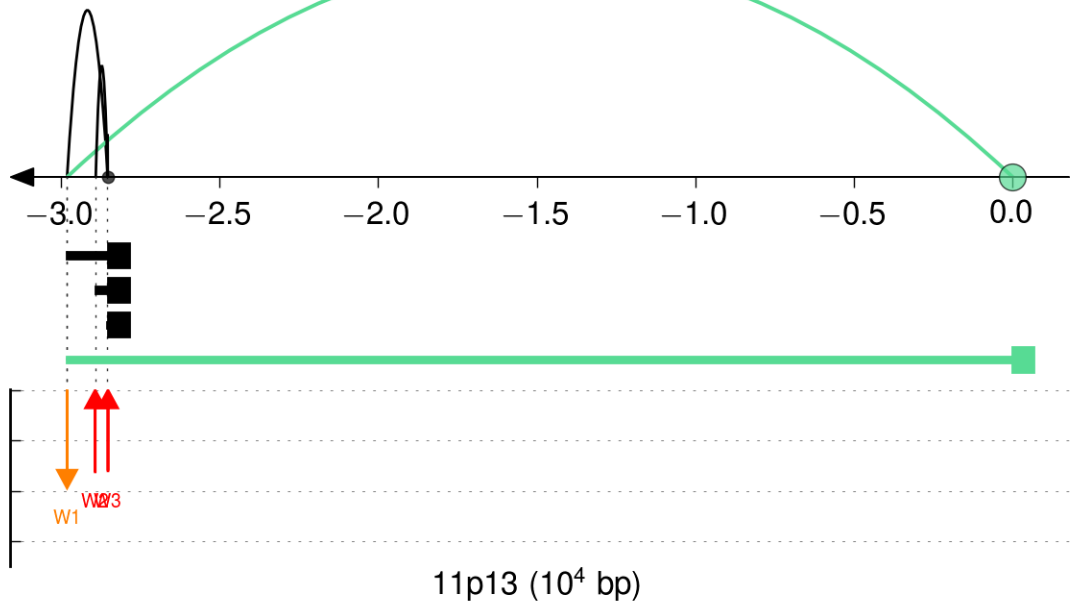

11p13 ( $10^4$  bp)
