# Supplementary material for: Recurrent tumor-specific regulation of alternative polyadenylation of cancer-related genes
Source: BMC Genomics. 2018 Jul 13;19:536. doi: 10.1186/s12864-018-4903-7 (PMC6045855; doi:10.1186/s12864-018-4903-7)
Supplement: Supplementary file 2 — Supplementary tables. It includes all supplementary tables. Table S1.List of 114 cancer-related genes. Table S2. Summary of the 33 cancer types. Table S3. Summary of the reported 33 genes involved in 77 events of tumor-specific cleavage patterns. Table S4. Details of all CSs involved in the reported 77 APA events. Table S5. Mapping relations between diseases in TCGA and those in COSMIC (Supplementary Methods). (XLSX 235 kb) [file 12864_2018_4903_MOESM2_ESM.xlsx]

## Sheet: Table S1
Table S1. Target cancer-related genes and their respective sources. For genes in Kumar et al., 2015, they were colored according to their type: red for oncogenes and blue for tumor suppressors. DICER1 appeared in both papers. KMT2A was renamed from MLL, and MYCL was renamed from MYCL1.
Source	Gene	Type
99 are from (Kumar et al., 2015)	ABL1	ONC
	AKT1	ONC
	AKT2	ONC
	ALK	ONC
	AMER1	TSG
	APC	TSG
	ATM	TSG
	AXIN1	TSG
	BAP1	TSG
	BCL6	ONC
	BRAF	ONC
	BRCA1	TSG
	BRCA2	TSG
	CARD11	ONC
	CCNE1	ONC
	CDH1	TSG
	CDKN2A	TSG
	CDKN2C	TSG
	CEBPA	TSG
	CREBBP	TSG
	CTNNB1	ONC
	CYLD	TSG
	DICER1	TSG
	EGFR	ONC
	EP300	TSG
	ERBB2	ONC
	EZH2	ONC
	FAS	ONC
	FBXW7	TSG
	FGFR2	ONC
	FGFR3	ONC
	FLT3	ONC
	GATA3	TSG
	GNA11	ONC
	GNAQ	ONC
	GNAS	ONC
	HNF1A	TSG
	HRAS	ONC
	IDH1	ONC
	JUN	ONC
	KDM6A	TSG
	KDR	ONC
	KIT	ONC
	KRAS	ONC
	MAP2K1	ONC
	MAP2K2	ONC
	MAP2K4	ONC
	MAX	TSG
	MDM2	ONC
	MDM4	ONC
	MEN1	TSG
	MET	ONC
	MITF	ONC
	MLH1	TSG
	MLL	ONC
	MSH2	TSG
	MSH6	TSG
	MYC	ONC
	MYCL1	ONC
	MYCN	ONC
	MYD88	ONC
	NF1	TSG
	NF2	TSG
	NFE2L2	ONC
	NKX2-1	ONC
	NOTCH1	TSG
	NOTCH2	TSG
	NRAS	ONC
	PAX5	TSG
	PDGFRA	ONC
	PIK3CA	ONC
	PIK3R1	TSG
	PRKAR1A	TSG
	PTCH1	TSG
	PTEN	TSG
	RB1	TSG
	REL	ONC
	RET	ONC
	RNF43	ONC
	SETD2	TSG
	SMAD4	TSG
	SMARCA4	TSG
	SMARCB1	TSG
	SMO	ONC
	SOCS1	TSG
	SOX2	ONC
	STAT3	ONC
	STK11	TSG
	SUFU	TSG
	TERT	ONC
	TET2	TSG
	TNFAIP3	TSG
	TP53	TSG
	TRAF7	ONC
	TSC1	TSG
	TSC2	TSG
	TSHR	ONC
	VHL	TSG
	WT1	TSG
6 are from (Mayr and Bartel, 2009)	CCND1	-
	CCND2	-
	DICER1	-
	FGF2	-
	IGF2BP1	-
	RAB10	-
10 are selected from a in-house study	CD47	-
	CHURC1	-
	DRAM1	-
	NFE2L3	-
	NFYA	-
	NSUN5	-
	RTCA	-
	SEC24A	-
	STK17A	-
	TXNL4A	-

## Sheet: Table S2
Table S2. Summary of the 33 cancer types. Cancer types in bold are those with sufficient (>15) normal samples, and they were considered for analysis related to comparisons between normal and tumor.
ID	Cancer type/Disease	Full name	Center	Normal	Tumor	Total
1	ACC	Adrenocortical Carcinoma	UNC-LCCC	0	79	79
2	BLCA	Bladder Urothelial Carcinoma	UNC-LCCC	19	414	433
3	BRCA	Breast Invasive Carcinoma	UNC-LCCC	114	1142	1256
4	CESC	Cervical Squamous Cell Carcinoma And Endocervical Adenocarcinoma	UNC-LCCC	3	306	309
5	CHOL	Cholangiocarcinoma	UNC-LCCC	9	36	45
6	COAD	Colon Adenocarcinoma	UNC-LCCC	41	313	354
7	DLBC	Lymphoid Neoplasm Diffuse Large B-Cell Lymphoma	UNC-LCCC	0	48	48
8	ESCA	Esophageal Carcinoma	BCCAGSC	13	185	198
9	GBM	Glioblastoma Multiforme	UNC-LCCC, BI	5	170	175
10	HNSC	Head And Neck Squamous Cell Carcinoma	UNC-LCCC	44	522	566
11	KICH	Kidney Chromophobe	UNC-LCCC	25	66	91
12	KIRC	Kidney Renal Clear Cell Carcinoma	UNC-LCCC	72	539	611
13	KIRP	Kidney Renal Papillary Cell Carcinoma	UNC-LCCC	32	291	323
14	LAML	Acute Myeloid Leukemia	BCCAGSC	0	150	150
15	LGG	Brain Lower Grade Glioma	UNC-LCCC	0	534	534
16	LIHC	Liver Hepatocellular Carcinoma	UNC-LCCC	50	374	424
17	LUAD	Lung Adenocarcinoma	UNC-LCCC	58	528	586
18	LUSC	Lung Squamous Cell Carcinoma	UNC-LCCC	51	504	555
19	MESO	Mesothelioma	UNC-LCCC	0	87	87
20	OV	Ovarian Serous Cystadenocarcinoma	BCCAGSC	0	429	429
21	PAAD	Pancreatic Adenocarcinoma	UNC-LCCC	4	179	183
22	PCPG	Pheochromocytoma And Paraganglioma	UNC-LCCC	3	184	187
23	PRAD	Prostate Adenocarcinoma	UNC-LCCC	52	506	558
24	READ	Rectum Adenocarcinoma	UNC-LCCC	10	95	105
25	SARC	Sarcoma	UNC-LCCC	2	263	265
26	SKCM	Skin Cutaneous Melanoma	UNC-LCCC	1	472	473
27	STAD	Stomach Adenocarcinoma	BCCAGSC	36	412	448
28	TGCT	Testicular Germ Cell Tumors	UNC-LCCC	0	156	156
29	THCA	Thyroid Carcinoma	UNC-LCCC	59	513	572
30	THYM	Thymoma	UNC-LCCC	2	120	122
31	UCEC	Uterine Corpus Endometrioid Carcinoma	UNC-LCCC	24	185	209
32	UCS	Uterine Carcinosarcoma	UNC-LCCC	0	57	57
33	UVM	Uveal Melanoma	UNC-LCCC	0	80	80
			Sum	729	9939	10668
			Percentage	0.0683352	0.931665	1

## Sheet: Table S3
Table S3. Summary of the reported 33 genes involved in 77 events of tumor-specific cleavage patterns. All lists of coordinates of CSs and stop codons are sorted.
Gene	Chromosome	Strand	Diseases with tumor-specific cleavage patterns	# diseases	Predicted CSs	Distance between neighboring predicted CSs	# predicted CSs	annotated CSs (after clustering)	Distance between neighboring annotated CSs	# annotated CSs	annotated stop codons	Distance between neighboring annotated stop codons	# annotated stop codons	annotated CS-stop codon pairs	# annotated CS-stop codon pairs
AKT2	chr19	-	BRCA, COAD, KIRP	3	40736224, 40736624, 40737007, 40738241, 40739552, 40739802, 40740422, 40743876, 40744860, 40745951, 40747391	400, 383, 1234, 1311, 250, 620, 3454, 984, 1091, 1440	11	40736224, 40739575, 40739687, 40739728, 40739785, 40740405, 40743896, 40744849, 40745976	3351, 112, 41, 57, 620, 3491, 953, 1127	9	40739779, 40739855, 40740387, 40740779, 40741347, 40744874, 40748496, 40750318	76, 532, 392, 568, 3527, 3622, 1822	8	(40736224, 40739779), (40739575, 40741347), (40739575, 40748496), (40739687, 40739855), (40739728, 40739779), (40739728, 40748496), (40739785, 40740387), (40740405, 40740779), (40743896, 40744874), (40744849, 40748496), (40745976, 40750318)	11
ALK	chr2	-	THCA	1	29415660, 29416078, 29443736	418, 27658	3	29415640, 29416089, 29443735	449, 27646	3	29416090, 29443854	27764	2	(29415640, 29416090), (29416089, 29416090), (29443735, 29443854)	3
AMER1	chrX	-	LUAD	1	63404997, 63405289, 63405979	292, 690	3	63404997, 63405996	999	2	63405997, 63409759	3762	2	(63404997, 63405997), (63404997, 63409759), (63405996, 63405997)	3
APC	chr5	+	COAD	1	112170731, 112177073, 112177823, 112178464, 112180676, 112180836, 112181761, 112181936	6342, 750, 641, 2212, 160, 925, 175	8	112178452, 112181753, 112181936	3301, 183	3	112145852, 112179823	33971	2	(112178452, 112145852), (112181753, 112179823), (112181936, 112179823)	3
ATM	chr11	+	HNSC	1	108100091, 108127108, 108153590, 108166714, 108173763, 108186638, 108237216, 108239440, 108239609, 108239827	27017, 26482, 13124, 7049, 12875, 50578, 2224, 169, 218	10	108166724, 108186622, 108239827	19898, 53205	3	108165678, 108180933, 108236235	15255, 55302	3	(108166724, 108165678), (108186622, 108180933), (108239827, 108236235)	3
BRCA1	chr17	-	BLCA, KIRC, KIRP, UCEC	4	41196318, 41196822, 41197709, 41215371, 41244206, 41245117, 41245837, 41246133, 41251829, 41276264, 41277386	504, 887, 17662, 28835, 911, 720, 296, 5696, 24435, 1122	11	41196313, 41196822, 41197580, 41197646, 41197694, 41246129, 41251848	509, 758, 66, 48, 48435, 5719	7	41197695, 41197801, 41256972, 41262552	106, 59171, 5580	4	(41196313, 41197695), (41196822, 41197801), (41197580, 41197695), (41197646, 41197695), (41197694, 41197695), (41197694, 41256972), (41246129, 41262552), (41251848, 41256972)	8
CCNE1	chr19	+	BRCA, HNSC, KIRP, LIHC, LUAD, LUSC	6	30314486, 30314898, 30315134, 30315215	412, 236, 81	4	30314918, 30315119, 30315214	201, 95	3	30314684		1	(30314918, 30314684), (30315119, 30314684), (30315214, 30314684)	3
CDKN2A	chr9	-	COAD, HNSC, KICH, KIRC, KIRP, LIHC, PRAD, THCA	8	21967755, 21967992, 21968200, 21968733, 21969564, 21970697, 21994884	237, 208, 533, 831, 1133, 24187	7	21967752, 21967995, 21968055, 21968104, 21968180, 21968723, 21969568, 21970715	243, 60, 49, 76, 543, 845, 1147	8	21968208, 21968228, 21968724, 21969731, 21970890, 21971002, 21974476	20, 496, 1007, 1159, 112, 3474	7	(21967752, 21968228), (21967752, 21971002), (21967995, 21968208), (21967995, 21968228), (21967995, 21971002), (21968055, 21968724), (21968104, 21968228), (21968180, 21968228), (21968180, 21974476), (21968723, 21968724), (21969568, 21969731), (21970715, 21970890)	12
CDKN2C	chr1	+	LIHC	1	51439973, 51440214, 51440306	241, 92	3	51440230, 51440305	75	2	51439942		1	(51440230, 51439942), (51440305, 51439942)	2
CHURC1	chr14	+	LUAD, LUSC	2	65320759, 65382073, 65390708, 65392873, 65397656, 65399029, 65399270, 65399371, 65399508, 65401114, 65401911, 65402086, 65410756, 65411291	61314, 8635, 2165, 4783, 1373, 241, 101, 137, 1606, 797, 175, 8670, 535	14	65397656, 65399038, 65401103, 65401913, 65402086, 65410775, 65411310	1382, 2065, 810, 173, 8689, 535	7	65397616, 65398917, 65398948, 65410039, 65410130	1301, 31, 11091, 91	5	(65397656, 65397616), (65399038, 65398917), (65401103, 65398948), (65401913, 65398948), (65402086, 65398948), (65410775, 65410130), (65411310, 65410039)	7
DRAM1	chr12	+	LUAD, LUSC	2	102295333, 102298553, 102302115, 102302202, 102308145, 102315343, 102315591, 102316117, 102316512, 102316890, 102317390, 102346442, 102405916	3220, 3562, 87, 5943, 7198, 248, 526, 395, 378, 500, 29052, 59474	13	102302106, 102315320, 102315592, 102317401, 102405909	13214, 272, 1809, 88508	5	102283881, 102307954, 102315038, 102405641	24073, 7084, 90603	4	(102302106, 102283881), (102315320, 102307954), (102315592, 102315038), (102317401, 102315038), (102405909, 102405641)	5
EZH2	chr7	-	BRCA, KIRC, KIRP, LIHC, LUAD, PRAD, THCA	7	148504477, 148504561, 148514434, 148515148, 148526831	84, 9873, 714, 11683	5	148504477, 148504574, 148504617, 148515129	97, 43, 10512	4	148504738, 148516131, 148529833	11393, 13702	3	(148504477, 148504738), (148504477, 148516131), (148504574, 148504738), (148504617, 148504738), (148515129, 148516131), (148515129, 148529833)	6
FGF2	chr4	+	BRCA, LUAD, LUSC, PRAD	4	123813648, 123814916, 123815953, 123816621, 123817951, 123818762, 123819379	1268, 1037, 668, 1330, 811, 617	7	123816619, 123819391	2772	2	123813551		1	(123816619, 123813551), (123819391, 123813551)	2
FGFR2	chr10	-	COAD, KIRC, LUAD, PRAD	4	123237846, 123238495, 123238591, 123238732, 123239113, 123239386, 123239557, 123241195, 123241383, 123297483, 123323838	649, 96, 141, 381, 273, 171, 1638, 188, 56100, 26355	11	123237848, 123237878, 123238586, 123238736, 123239133, 123239370, 123239564, 123241349, 123241370, 123297480	30, 708, 150, 397, 237, 194, 1785, 21, 56110	10	123239095, 123239371, 123239391, 123239565, 123241686, 123276964, 123297908	276, 20, 174, 2121, 35278, 20944	7	(123237848, 123239095), (123237848, 123239371), (123237878, 123239371), (123238586, 123239371), (123238736, 123239371), (123238736, 123276964), (123239133, 123239371), (123239370, 123239371), (123239370, 123239391), (123239564, 123239565), (123241349, 123241686), (123241370, 123241686), (123297480, 123297908)	13
FLT3	chr13	-	BRCA, KICH	2	28577411, 28577772, 28577921, 28602111, 28623675	361, 149, 24190, 21564	5	28577412, 28577751, 28577930	339, 179	3	28578189, 28599540	21351	2	(28577412, 28578189), (28577751, 28599540), (28577930, 28578189)	3
GNAS	chr20	+	BRCA, KICH	2	57430390, 57431602, 57432237, 57467991, 57475465, 57478602, 57480516, 57485913, 57486247, 57493005, 57497116	1212, 635, 35754, 7474, 3137, 1914, 5397, 334, 6758, 4111	11	57430389, 57432246, 57475465, 57478599, 57480536, 57486247	1857, 43219, 3134, 1937, 5711	6	57415899, 57430388, 57430703, 57475010, 57485884	14489, 315, 44307, 10874	5	(57430389, 57430388), (57432246, 57430703), (57475465, 57415899), (57475465, 57475010), (57478599, 57415899), (57480536, 57415899), (57486247, 57415899), (57486247, 57485884)	8
HNF1A	chr12	+	COAD, LUAD	2	121434955, 121435704, 121436097, 121439078, 121440315	749, 393, 2981, 1237	5	121434969, 121435685, 121436103, 121439072, 121440315	716, 418, 2969, 1243	5	121431356, 121434095, 121434133, 121434473, 121434489, 121434799, 121435596, 121438995	2739, 38, 340, 16, 310, 797, 3399	8	(121434969, 121434799), (121435685, 121434095), (121435685, 121434133), (121435685, 121434473), (121435685, 121435596), (121436103, 121434799), (121436103, 121435596), (121439072, 121438995), (121440315, 121431356), (121440315, 121434489), (121440315, 121438995)	11
KIT	chr4	+	COAD	1	55605200, 55606881	1681	2	55605177, 55606881	1704	2	55604723		1	(55605177, 55604723), (55606881, 55604723)	2
KRAS	chr12	-	BRCA, PRAD	2	25357557, 25357727, 25358180, 25358304, 25359347, 25359733, 25359865, 25360581, 25361293, 25361772, 25361885, 25362098, 25362377, 25368385, 25378427, 25378506, 25378651, 25386777, 25387405, 25392460	170, 453, 124, 1043, 386, 132, 716, 712, 479, 113, 213, 279, 6008, 10042, 79, 145, 8126, 628, 5055	20	25357723, 25362102, 25362365, 25386753	4379, 263, 24388	4	25362729, 25368375, 25388140	5646, 19765	3	(25357723, 25362729), (25362102, 25362729), (25362365, 25368375), (25386753, 25388140)	4
MAX	chr14	-	BRCA, LUAD	2	65472875, 65516398, 65522223, 65526864, 65537066, 65541845, 65542263, 65542791, 65543174, 65544012, 65544128, 65544477, 65550462, 65560136	43523, 5825, 4641, 10202, 4779, 418, 528, 383, 838, 116, 349, 5985, 9674	14	65472892, 65541843, 65541876, 65541920, 65542262, 65542804, 65543178, 65544012, 65544103, 65544492, 65550462	68951, 33, 44, 342, 542, 374, 834, 91, 389, 5970	11	65472922, 65543169, 65543194, 65544130, 65544521, 65550898	70247, 25, 936, 391, 6377	6	(65472892, 65472922), (65541843, 65543194), (65541843, 65544130), (65541876, 65543169), (65541920, 65544521), (65542262, 65543194), (65542804, 65543194), (65543178, 65543194), (65543178, 65544130), (65544012, 65544130), (65544103, 65544130), (65544492, 65544521), (65550462, 65550898)	13
MDM4	chr1	+	LUSC	1	204502047, 204503981, 204506177, 204513773, 204518823, 204518896, 204519854, 204520031, 204521790, 204524096, 204525464, 204526207, 204527244, 204542871	1934, 2196, 7596, 5050, 73, 958, 177, 1759, 2306, 1368, 743, 1037, 15627	14	204506169, 204518810, 204518906, 204527248, 204542871	12641, 96, 8342, 15623	5	204506047, 204507416, 204518810, 204527809	1369, 11394, 8999	4	(204506169, 204506047), (204518810, 204507416), (204518906, 204518810), (204527248, 204518810), (204542871, 204527809)	5
MET	chr7	+	BRCA	1	116371866, 116398156, 116403123, 116409934, 116436399, 116436629, 116438431	26290, 4967, 6811, 26465, 230, 1802	7	116403135, 116409964, 116436396, 116436654, 116438440	6829, 26432, 258, 1786	5	116403134, 116409920, 116436178	6786, 26258	3	(116403135, 116403134), (116409964, 116409920), (116436396, 116436178), (116436654, 116436178), (116438440, 116436178)	5
MITF	chr3	+	BRCA, LUSC, UCEC	3	69801317, 69987109, 70014425, 70014745, 70014815, 70014975, 70015198, 70015620, 70016162, 70016647, 70017179, 70017483	185792, 27316, 320, 70, 160, 223, 422, 542, 485, 532, 304	12	70014400, 70014721, 70014798, 70014819, 70014975, 70015180, 70017487	321, 77, 21, 156, 205, 2307	7	69990394, 70014399	24005	2	(70014400, 70014399), (70014721, 69990394), (70014798, 70014399), (70014819, 70014399), (70014975, 70014399), (70015180, 70014399), (70017487, 70014399)	7
MYCL	chr1	-	KICH	1	40361100, 40362865, 40365284, 40365402	1765, 2419, 118	4	40361098, 40362899, 40365285	1801, 2386	3	40363044, 40366486	3442	2	(40361098, 40363044), (40362899, 40363044), (40365285, 40366486)	3
NF1	chr17	+	BRCA	1	29490489, 29546380, 29549175, 29549571, 29549662, 29549782, 29553875, 29580002, 29581295, 29582917, 29588833, 29653296, 29663600, 29663623, 29663881, 29664730, 29664788, 29685665, 29687607, 29687999, 29688245, 29701308, 29701453, 29701907, 29702677, 29702757, 29702849, 29703353, 29704693, 29708902, 29709134	55891, 2795, 396, 91, 120, 4093, 26127, 1293, 1622, 5916, 64463, 10304, 23, 258, 849, 58, 20877, 1942, 392, 246, 13063, 145, 454, 770, 80, 92, 504, 1340, 4209, 232	31	29549782, 29581311, 29588813, 29663892, 29687615, 29687975, 29701306, 29701452, 29704695, 29708905, 29709125	31529, 7502, 75079, 23723, 360, 13331, 146, 3243, 4210, 220	11	29508452, 29549008, 29584737, 29652837, 29661862, 29683496, 29687729, 29701173, 29705949	40556, 35729, 68100, 9025, 21634, 4233, 13444, 4776	9	(29549782, 29549008), (29581311, 29508452), (29588813, 29584737), (29663892, 29661862), (29687615, 29683496), (29687615, 29683496), (29687975, 29687729), (29701306, 29652837), (29701452, 29701173), (29704695, 29701173), (29708905, 29705949), (29708905, 29705949), (29709125, 29705949)	13
NFE2L2	chr2	-	BRCA, KIRC, THCA	3	178083921, 178088003, 178092115, 178092302, 178094864, 178095036, 178095782, 178096498, 178096827, 178097020, 178097569, 178097854, 178098653, 178148250, 178175658, 178180973, 178209042	4082, 4112, 187, 2562, 172, 746, 716, 329, 193, 549, 285, 799, 49597, 27408, 5315, 28069	17	178092322, 178095034, 178097005	2712, 1971	3	178092634, 178095513, 178097906	2879, 2393	3	(178092322, 178092634), (178095034, 178095513), (178097005, 178097906)	3
NFE2L3	chr7	+	KIRC	1	26223505, 26225104, 26225930, 26226431, 26226745, 26226999	1599, 826, 501, 314, 254	6	26223495, 26226745	3250	2	26223452, 26225403	1951	2	(26223495, 26223452), (26226745, 26225403)	2
PTCH1	chr9	-	BRCA	1	98205278, 98205693, 98206117, 98206430, 98208439, 98242800, 98244110, 98244231, 98248136, 98269924	415, 424, 313, 2009, 34361, 1310, 121, 3905, 21788	10	98205266, 98205693, 98206444, 98208441, 98242821, 98244111, 98244252	427, 751, 1997, 34380, 1290, 141	7	98209194, 98236330, 98244227, 98244319, 98248142	27136, 7897, 92, 3823	5	(98205266, 98209194), (98205693, 98209194), (98205693, 98236330), (98206444, 98209194), (98208441, 98209194), (98242821, 98244319), (98244111, 98244227), (98244252, 98248142)	8
RB1	chr13	+	BRCA	1	48881489, 48882502, 48937028, 48939154, 48954420, 49039355, 49039596, 49050883, 49054853, 49055463, 49056026, 49056142	1013, 54526, 2126, 15266, 84935, 241, 11287, 3970, 610, 563, 116	12	48937044, 49056122	119078	2	48934177, 49054207	120030	2	(48937044, 48934177), (49056122, 49054207)	2
RNF43	chr17	-	KIRC, UCEC	2	56429878, 56431037, 56432284, 56434325	1159, 1247, 2041	4	56429861, 56431037, 56432288, 56434344	1176, 1251, 2056	4	56432304, 56434527	2223	2	(56429861, 56432304), (56431037, 56432304), (56432288, 56432304), (56434344, 56434527)	4
SOX2	chr3	+	BRCA	1	181431123, 181432224	1101	2	181431103, 181432221	1118	2	181431102		1	(181431103, 181431102), (181432221, 181431102)	2
SUFU	chr10	+	BRCA	1	104284625, 104378418, 104379220, 104390024, 104393211, 104393267	93793, 802, 10804, 3187, 56	6	104378416, 104379219, 104393292	803, 14073	3	104377335, 104378828, 104389912	1493, 11084	3	(104378416, 104377335), (104379219, 104378828), (104393292, 104389912)	3
WT1	chr11	-	BRCA, KICH, KIRC, KIRP	4	32409321, 32410121, 32410207, 32410611, 32449321	800, 86, 404, 38710	5	32409321, 32410225, 32410587	904, 362	3	32410604, 32439119	28515	2	(32409321, 32410604), (32409321, 32439119), (32410225, 32410604), (32410587, 32410604)	4

## Sheet: Table S4
Table S4. Details of all CSs involved in the reported 77 events of tumor-specific cleavage patterns. N/T on/off means the number of normal/tumor samples that are predicted to use the CS or not. 3' UTR length is calculated only when the distance between predicted and annotated CS is < 25 bp, and there is only one mapped stop codon.
Gene	Chromosome	Disease	CS	Strand	N on	T on	N off	T off	N total	T total	N on ratio	T on ratio	ratio change from N to T	p-value	p-value < 0.01	mapped annotated CS candidate	distance between predicted and annotated CS	distance < 25 bp	mapped annotated stop codon(s)	# mapped stop codons	3'UTR length
AKT2	chr19	BRCA	40736224	-	105	878	9	261	114	1139	0.92	0.77	down	6.772171300857458e-05	True	40736224	0	True	40739779	1	3555
AKT2	chr19	BRCA	40736624	-	13	40	101	1099	114	1139	0.11	0.04	down	0.0005451061743427601	True	40736224	400	False	40739779	1	NA
AKT2	chr19	BRCA	40737007	-	23	272	91	867	114	1139	0.20	0.24	up	0.4187747790318088	False	40736224	783	False	40739779	1	NA
AKT2	chr19	BRCA	40738241	-	74	874	40	265	114	1139	0.65	0.77	up	0.008091526490020883	True	40739575	1334	False	40741347, 40748496	2	NA
AKT2	chr19	BRCA	40739552	-	54	548	60	591	114	1139	0.47	0.48	up	0.9218241399773426	False	40739575	23	True	40741347, 40748496	2	NA
AKT2	chr19	BRCA	40739802	-	106	1037	8	102	114	1139	0.93	0.91	down	0.6031917963030051	False	40739785	17	True	40740387	1	585
AKT2	chr19	BRCA	40740422	-	49	433	65	706	114	1139	0.43	0.38	down	0.3134668707016194	False	40740405	17	True	40740779	1	357
AKT2	chr19	BRCA	40743876	-	48	505	66	634	114	1139	0.42	0.44	up	0.692801678698169	False	40743896	20	True	40744874	1	998
AKT2	chr19	BRCA	40744860	-	99	845	15	294	114	1139	0.87	0.74	down	0.002023845831481972	True	40744849	11	True	40748496	1	3636
AKT2	chr19	BRCA	40745951	-	64	622	50	517	114	1139	0.56	0.55	down	0.7682127114043851	False	40745976	25	False	40750318	1	NA
AKT2	chr19	BRCA	40747391	-	0	1	114	1138	114	1139	0.00	0.00	up	1.0	False	40745976	1415	False	40750318	1	NA
AKT2	chr19	COAD	40736224	-	31	225	10	86	41	311	0.76	0.72	down	0.7136415934656437	False	40736224	0	True	40739779	1	3555
AKT2	chr19	COAD	40736624	-	1	6	40	305	41	311	0.02	0.02	down	0.5830702826245439	False	40736224	400	False	40739779	1	NA
AKT2	chr19	COAD	40737007	-	1	82	40	229	41	311	0.02	0.26	up	0.00015358876752274202	True	40736224	783	False	40739779	1	NA
AKT2	chr19	COAD	40738241	-	29	220	12	91	41	311	0.71	0.71	up	1.0	False	40739575	1334	False	40741347, 40748496	2	NA
AKT2	chr19	COAD	40739552	-	10	105	31	206	41	311	0.24	0.34	up	0.2884801655546708	False	40739575	23	True	40741347, 40748496	2	NA
AKT2	chr19	COAD	40739802	-	34	266	7	45	41	311	0.83	0.86	up	0.6417592140227049	False	40739785	17	True	40740387	1	585
AKT2	chr19	COAD	40740422	-	24	108	17	203	41	311	0.59	0.35	down	0.0054414313157036594	True	40740405	17	True	40740779	1	357
AKT2	chr19	COAD	40743876	-	14	106	27	205	41	311	0.34	0.34	down	1.0	False	40743896	20	True	40744874	1	998
AKT2	chr19	COAD	40744860	-	25	179	16	132	41	311	0.61	0.58	down	0.7382291839684312	False	40744849	11	True	40748496	1	3636
AKT2	chr19	COAD	40745951	-	17	128	24	183	41	311	0.41	0.41	down	1.0	False	40745976	25	False	40750318	1	NA
AKT2	chr19	KIRP	40736224	-	29	253	3	37	32	290	0.91	0.87	down	0.7800126173316346	False	40736224	0	True	40739779	1	3555
AKT2	chr19	KIRP	40736624	-	1	34	31	256	32	290	0.03	0.12	up	0.2270098791657595	False	40736224	400	False	40739779	1	NA
AKT2	chr19	KIRP	40737007	-	7	134	25	156	32	290	0.22	0.46	up	0.008540723928461457	True	40736224	783	False	40739779	1	NA
AKT2	chr19	KIRP	40738241	-	25	253	7	37	32	290	0.78	0.87	up	0.1731624104233302	False	40739575	1334	False	40741347, 40748496	2	NA
AKT2	chr19	KIRP	40739552	-	21	97	11	193	32	290	0.66	0.33	down	0.0007421820605752838	True	40739575	23	True	40741347, 40748496	2	NA
AKT2	chr19	KIRP	40739802	-	32	245	0	45	32	290	1.00	0.84	down	0.012595259672148484	False	40739785	17	True	40740387	1	585
AKT2	chr19	KIRP	40740422	-	18	91	14	199	32	290	0.56	0.31	down	0.009364117238366238	True	40740405	17	True	40740779	1	357
AKT2	chr19	KIRP	40743876	-	22	120	10	170	32	290	0.69	0.41	down	0.004353234724512208	True	40743896	20	True	40744874	1	998
AKT2	chr19	KIRP	40744860	-	26	177	6	113	32	290	0.81	0.61	down	0.03240877231973696	False	40744849	11	True	40748496	1	3636
AKT2	chr19	KIRP	40745951	-	18	150	14	140	32	290	0.56	0.52	down	0.7106094081765875	False	40745976	25	False	40750318	1	NA
ALK	chr2	THCA	29415660	-	24	338	21	76	45	414	0.53	0.82	up	5.795988882967133e-05	True	29415640	20	True	29416090	1	430
ALK	chr2	THCA	29416078	-	28	162	17	252	45	414	0.62	0.39	down	0.0038149415409551523	True	29416089	11	True	29416090	1	12
ALK	chr2	THCA	29443736	-	9	109	36	305	45	414	0.20	0.26	up	0.4724404334841869	False	29443735	1	True	29443854	1	118
AMER1	chrX	LUAD	63404997	-	45	481	7	15	52	496	0.87	0.97	up	0.0025862010157332712	True	63404997	0	True	63405997, 63409759	2	NA
AMER1	chrX	LUAD	63405289	-	0	1	52	495	52	496	0.00	0.00	up	1.0	False	63404997	292	False	63405997, 63409759	2	NA
AMER1	chrX	LUAD	63405979	-	20	89	32	407	52	496	0.38	0.18	down	0.0014711942213813279	True	63405996	17	True	63405997	1	18
APC	chr5	COAD	112170731	+	0	2	39	287	39	289	0.00	0.01	up	1.0	False	112178452	7721	False	112145852	1	NA
APC	chr5	COAD	112177073	+	0	1	39	288	39	289	0.00	0.00	up	1.0	False	112178452	1379	False	112145852	1	NA
APC	chr5	COAD	112177823	+	1	0	38	289	39	289	0.03	0.00	down	0.1189024390243868	False	112178452	629	False	112145852	1	NA
APC	chr5	COAD	112178464	+	2	17	37	272	39	289	0.05	0.06	up	1.0	False	112178452	12	True	112145852	1	32612
APC	chr5	COAD	112180676	+	7	52	32	237	39	289	0.18	0.18	up	1.0	False	112181753	1077	False	112179823	1	NA
APC	chr5	COAD	112180836	+	3	30	36	259	39	289	0.08	0.10	up	0.7803755180095062	False	112181753	917	False	112179823	1	NA
APC	chr5	COAD	112181761	+	17	214	22	75	39	289	0.44	0.74	up	0.00025759896497098435	True	112181753	8	True	112179823	1	1938
APC	chr5	COAD	112181936	+	32	164	7	125	39	289	0.82	0.57	down	0.002732094373774482	True	112181936	0	True	112179823	1	2113
ATM	chr11	HNSC	108100091	+	4	41	32	416	36	457	0.11	0.09	down	0.5582592049526167	False	108166724	66633	False	108165678	1	NA
ATM	chr11	HNSC	108127108	+	0	1	36	456	36	457	0.00	0.00	up	1.0	False	108166724	39616	False	108165678	1	NA
ATM	chr11	HNSC	108153590	+	0	1	36	456	36	457	0.00	0.00	up	1.0	False	108166724	13134	False	108165678	1	NA
ATM	chr11	HNSC	108166714	+	11	243	25	214	36	457	0.31	0.53	up	0.009495983031854931	True	108166724	10	True	108165678	1	1036
ATM	chr11	HNSC	108173763	+	0	1	36	456	36	457	0.00	0.00	up	1.0	False	108166724	7039	False	108165678	1	NA
ATM	chr11	HNSC	108186638	+	5	99	31	358	36	457	0.14	0.22	up	0.3949606616053546	False	108186622	16	True	108180933	1	5705
ATM	chr11	HNSC	108237216	+	2	31	34	426	36	457	0.06	0.07	up	1.0	False	108239827	2611	False	108236235	1	NA
ATM	chr11	HNSC	108239440	+	0	1	36	456	36	457	0.00	0.00	up	1.0	False	108239827	387	False	108236235	1	NA
ATM	chr11	HNSC	108239609	+	0	4	36	453	36	457	0.00	0.01	up	1.0	False	108239827	218	False	108236235	1	NA
ATM	chr11	HNSC	108239827	+	35	334	1	123	36	457	0.97	0.73	down	0.00047014822738468875	True	108239827	0	True	108236235	1	3592
BRCA1	chr17	BLCA	41196318	-	13	401	6	13	19	414	0.68	0.97	up	5.886298141323444e-05	True	41196313	5	True	41197695	1	1377
BRCA1	chr17	BLCA	41196822	-	15	323	4	91	19	414	0.79	0.78	down	1.0	False	41196822	0	True	41197801	1	979
BRCA1	chr17	BLCA	41197709	-	7	92	12	322	19	414	0.37	0.22	down	0.16120564599444065	False	41197694	15	True	41197695, 41256972	2	NA
BRCA1	chr17	BLCA	41215371	-	0	10	19	404	19	414	0.00	0.02	up	1.0	False	41197694	17677	False	41197695, 41256972	2	NA
BRCA1	chr17	BLCA	41244206	-	0	1	19	413	19	414	0.00	0.00	up	1.0	False	41246129	1923	False	41262552	1	NA
BRCA1	chr17	BLCA	41245117	-	0	1	19	413	19	414	0.00	0.00	up	1.0	False	41246129	1012	False	41262552	1	NA
BRCA1	chr17	BLCA	41245837	-	0	1	19	413	19	414	0.00	0.00	up	1.0	False	41246129	292	False	41262552	1	NA
BRCA1	chr17	BLCA	41246133	-	4	119	15	295	19	414	0.21	0.29	up	0.6068133263755142	False	41246129	4	True	41262552	1	16419
BRCA1	chr17	BLCA	41251829	-	14	118	5	296	19	414	0.74	0.29	down	9.157332344827222e-05	True	41251848	19	True	41256972	1	5143
BRCA1	chr17	BLCA	41276264	-	0	10	19	404	19	414	0.00	0.02	up	1.0	False	41251848	24416	False	41256972	1	NA
BRCA1	chr17	BLCA	41277386	-	0	1	19	413	19	414	0.00	0.00	up	1.0	False	41251848	25538	False	41256972	1	NA
BRCA1	chr17	KIRC	41196318	-	54	472	18	63	72	535	0.75	0.88	up	0.004719989500679435	True	41196313	5	True	41197695	1	1377
BRCA1	chr17	KIRC	41196822	-	48	390	24	145	72	535	0.67	0.73	up	0.2657788977637465	False	41196822	0	True	41197801	1	979
BRCA1	chr17	KIRC	41197709	-	49	244	23	291	72	535	0.68	0.46	down	0.0003929905729547149	True	41197694	15	True	41197695, 41256972	2	NA
BRCA1	chr17	KIRC	41215371	-	0	3	72	532	72	535	0.00	0.01	up	1.0	False	41197694	17677	False	41197695, 41256972	2	NA
BRCA1	chr17	KIRC	41246133	-	33	189	39	346	72	535	0.46	0.35	down	0.090737983024931	False	41246129	4	True	41262552	1	16419
BRCA1	chr17	KIRC	41251829	-	36	185	36	350	72	535	0.50	0.35	down	0.013029943575526476	False	41251848	19	True	41256972	1	5143
BRCA1	chr17	KIRP	41196318	-	21	269	11	21	32	290	0.66	0.93	up	5.165447805631549e-05	True	41196313	5	True	41197695	1	1377
BRCA1	chr17	KIRP	41196822	-	24	211	8	79	32	290	0.75	0.73	down	1.0	False	41196822	0	True	41197801	1	979
BRCA1	chr17	KIRP	41197709	-	24	134	8	156	32	290	0.75	0.46	down	0.00248928396700056	True	41197694	15	True	41197695, 41256972	2	NA
BRCA1	chr17	KIRP	41215371	-	0	3	32	287	32	290	0.00	0.01	up	1.0	False	41197694	17677	False	41197695, 41256972	2	NA
BRCA1	chr17	KIRP	41246133	-	15	99	17	191	32	290	0.47	0.34	down	0.17421506581975926	False	41246129	4	True	41262552	1	16419
BRCA1	chr17	KIRP	41251829	-	16	108	16	182	32	290	0.50	0.37	down	0.18194519268535586	False	41251848	19	True	41256972	1	5143
BRCA1	chr17	KIRP	41276264	-	0	1	32	289	32	290	0.00	0.00	up	1.0	False	41251848	24416	False	41256972	1	NA
BRCA1	chr17	UCEC	41196318	-	19	181	5	4	24	185	0.79	0.98	up	0.0012230844943850222	True	41196313	5	True	41197695	1	1377
BRCA1	chr17	UCEC	41196822	-	17	136	7	49	24	185	0.71	0.74	up	0.8080440785061862	False	41196822	0	True	41197801	1	979
BRCA1	chr17	UCEC	41197709	-	12	39	12	146	24	185	0.50	0.21	down	0.0042199569661517345	True	41197694	15	True	41197695, 41256972	2	NA
BRCA1	chr17	UCEC	41215371	-	0	3	24	182	24	185	0.00	0.02	up	1.0	False	41197694	17677	False	41197695, 41256972	2	NA
BRCA1	chr17	UCEC	41246133	-	13	63	11	122	24	185	0.54	0.34	down	0.07064918031948299	False	41246129	4	True	41262552	1	16419
BRCA1	chr17	UCEC	41251829	-	10	57	14	128	24	185	0.42	0.31	down	0.3524647245469308	False	41251848	19	True	41256972	1	5143
BRCA1	chr17	UCEC	41276264	-	0	1	24	184	24	185	0.00	0.01	up	1.0	False	41251848	24416	False	41256972	1	NA
BRCA1	chr17	UCEC	41277386	-	0	1	24	184	24	185	0.00	0.01	up	1.0	False	41251848	25538	False	41256972	1	NA
CCNE1	chr19	BRCA	30314898	+	35	191	59	785	94	976	0.37	0.20	down	0.00017083280535799386	True	30314918	20	True	30314684	1	214
CCNE1	chr19	BRCA	30315134	+	72	322	22	654	94	976	0.77	0.33	down	2.3346141668835087e-16	True	30315119	15	True	30314684	1	450
CCNE1	chr19	BRCA	30315215	+	30	765	64	211	94	976	0.32	0.78	up	1.1478419054088348e-19	True	30315214	1	True	30314684	1	531
CCNE1	chr19	HNSC	30314898	+	6	57	29	441	35	498	0.17	0.11	down	0.2850648152254227	False	30314918	20	True	30314684	1	214
CCNE1	chr19	HNSC	30315134	+	8	38	27	460	35	498	0.23	0.08	down	0.0065384185355775145	True	30315119	15	True	30314684	1	450
CCNE1	chr19	HNSC	30315215	+	28	491	7	7	35	498	0.80	0.99	up	7.0848147439214144e-06	True	30315214	1	True	30314684	1	531
CCNE1	chr19	KIRP	30314898	+	4	37	24	198	28	235	0.14	0.16	up	1.0	False	30314918	20	True	30314684	1	214
CCNE1	chr19	KIRP	30315134	+	21	108	7	127	28	235	0.75	0.46	down	0.004592266545305507	True	30315119	15	True	30314684	1	450
CCNE1	chr19	KIRP	30315215	+	12	167	16	68	28	235	0.43	0.71	up	0.004500449106937466	True	30315214	1	True	30314684	1	531
CCNE1	chr19	LIHC	30314898	+	19	58	20	260	39	318	0.49	0.18	down	9.842517238135579e-05	True	30314918	20	True	30314684	1	214
CCNE1	chr19	LIHC	30315134	+	31	136	8	182	39	318	0.79	0.43	down	1.3384260370990469e-05	True	30315119	15	True	30314684	1	450
CCNE1	chr19	LIHC	30315215	+	9	236	30	82	39	318	0.23	0.74	up	6.446925809069833e-10	True	30315214	1	True	30314684	1	531
CCNE1	chr19	LUAD	30314898	+	29	73	22	394	51	467	0.57	0.16	down	4.340892651117946e-10	True	30314918	20	True	30314684	1	214
CCNE1	chr19	LUAD	30315134	+	41	125	10	342	51	467	0.80	0.27	down	8.111643625775656e-14	True	30315119	15	True	30314684	1	450
CCNE1	chr19	LUAD	30315215	+	13	403	38	64	51	467	0.25	0.86	up	1.6649511724351555e-19	True	30315214	1	True	30314684	1	531
CCNE1	chr19	LUSC	30314486	+	0	1	43	490	43	491	0.00	0.00	up	1.0	False	30314918	432	False	30314684	1	NA
CCNE1	chr19	LUSC	30314898	+	17	80	26	411	43	491	0.40	0.16	down	0.0006034635523987045	True	30314918	20	True	30314684	1	214
CCNE1	chr19	LUSC	30315134	+	32	57	11	434	43	491	0.74	0.12	down	8.656066121219443e-19	True	30315119	15	True	30314684	1	450
CCNE1	chr19	LUSC	30315215	+	20	481	23	10	43	491	0.47	0.98	up	4.669744714883781e-21	True	30315214	1	True	30314684	1	531
CDKN2A	chr9	COAD	21967755	-	6	157	33	141	39	298	0.15	0.53	up	1.06248287745344e-05	True	21967752	3	True	21968228, 21971002	2	NA
CDKN2A	chr9	COAD	21967992	-	36	216	3	82	39	298	0.92	0.72	down	0.0056352596174526134	True	21967995	3	True	21968208, 21968228, 21971002	3	NA
CDKN2A	chr9	COAD	21968200	-	9	52	30	246	39	298	0.23	0.17	down	0.38106282548017295	False	21968180	20	True	21968228, 21974476	2	NA
CDKN2A	chr9	COAD	21968733	-	4	89	35	209	39	298	0.10	0.30	up	0.007800180633627942	True	21968723	10	True	21968724	1	9
CDKN2A	chr9	COAD	21969564	-	1	82	38	216	39	298	0.03	0.28	up	0.00023304851914426303	True	21969568	4	True	21969731	1	167
CDKN2A	chr9	COAD	21970697	-	5	84	34	214	39	298	0.13	0.28	up	0.051911210755015855	False	21970715	18	True	21970890	1	193
CDKN2A	chr9	HNSC	21967755	-	18	323	22	183	40	506	0.45	0.64	up	0.02630012504090773	False	21967752	3	True	21968228, 21971002	2	NA
CDKN2A	chr9	HNSC	21967992	-	28	468	12	38	40	506	0.70	0.92	up	7.536332628743963e-05	True	21967995	3	True	21968208, 21968228, 21971002	3	NA
CDKN2A	chr9	HNSC	21968200	-	3	235	37	271	40	506	0.07	0.46	up	4.484753403917563e-07	True	21968180	20	True	21968228, 21974476	2	NA
CDKN2A	chr9	HNSC	21968733	-	9	111	31	395	40	506	0.23	0.22	down	1.0	False	21968723	10	True	21968724	1	9
CDKN2A	chr9	HNSC	21969564	-	8	127	32	379	40	506	0.20	0.25	up	0.5702024150442984	False	21969568	4	True	21969731	1	167
CDKN2A	chr9	HNSC	21970697	-	16	90	24	416	40	506	0.40	0.18	down	0.001534828114404304	True	21970715	18	True	21970890	1	193
CDKN2A	chr9	HNSC	21994884	-	0	1	40	505	40	506	0.00	0.00	up	1.0	False	21970715	24169	False	21970890	1	NA
CDKN2A	chr9	KICH	21967755	-	1	36	21	27	22	63	0.05	0.57	up	9.312541336465635e-06	True	21967752	3	True	21968228, 21971002	2	NA
CDKN2A	chr9	KICH	21967992	-	21	40	1	23	22	63	0.95	0.63	down	0.004808754808549178	True	21967995	3	True	21968208, 21968228, 21971002	3	NA
CDKN2A	chr9	KICH	21968200	-	9	13	13	50	22	63	0.41	0.21	down	0.08890623596639677	False	21968180	20	True	21968228, 21974476	2	NA
CDKN2A	chr9	KICH	21968733	-	1	17	21	46	22	63	0.05	0.27	up	0.03281440445713992	False	21968723	10	True	21968724	1	9
CDKN2A	chr9	KICH	21969564	-	1	27	21	36	22	63	0.05	0.43	up	0.0005877014725454891	True	21969568	4	True	21969731	1	167
CDKN2A	chr9	KICH	21970697	-	5	15	17	48	22	63	0.23	0.24	up	1.0	False	21970715	18	True	21970890	1	193
CDKN2A	chr9	KIRC	21967755	-	4	326	54	174	58	500	0.07	0.65	up	1.2572475790271522e-18	True	21967752	3	True	21968228, 21971002	2	NA
CDKN2A	chr9	KIRC	21967992	-	56	258	2	242	58	500	0.97	0.52	down	5.966570876883656e-13	True	21967995	3	True	21968208, 21968228, 21971002	3	NA
CDKN2A	chr9	KIRC	21968200	-	28	51	30	449	58	500	0.48	0.10	down	2.0585874402322765e-11	True	21968180	20	True	21968228, 21974476	2	NA
CDKN2A	chr9	KIRC	21968733	-	2	200	56	300	58	500	0.03	0.40	up	1.1616173911190984e-09	True	21968723	10	True	21968724	1	9
CDKN2A	chr9	KIRC	21969564	-	1	230	57	270	58	500	0.02	0.46	up	3.062287215050888e-13	True	21969568	4	True	21969731	1	167
CDKN2A	chr9	KIRC	21970697	-	2	205	56	295	58	500	0.03	0.41	up	5.068851633252955e-10	True	21970715	18	True	21970890	1	193
CDKN2A	chr9	KIRP	21967755	-	1	137	27	142	28	279	0.04	0.49	up	9.42728919525633e-07	True	21967752	3	True	21968228, 21971002	2	NA
CDKN2A	chr9	KIRP	21967992	-	25	202	3	77	28	279	0.89	0.72	down	0.06885476754814662	False	21967995	3	True	21968208, 21968228, 21971002	3	NA
CDKN2A	chr9	KIRP	21968200	-	11	47	17	232	28	279	0.39	0.17	down	0.008883879657286965	True	21968180	20	True	21968228, 21974476	2	NA
CDKN2A	chr9	KIRP	21968733	-	1	86	27	193	28	279	0.04	0.31	up	0.0014713967216425019	True	21968723	10	True	21968724	1	9
CDKN2A	chr9	KIRP	21969564	-	0	84	28	195	28	279	0.00	0.30	up	9.782379250821804e-05	True	21969568	4	True	21969731	1	167
CDKN2A	chr9	KIRP	21970697	-	2	86	26	193	28	279	0.07	0.31	up	0.0074392633863952515	True	21970715	18	True	21970890	1	193
CDKN2A	chr9	LIHC	21967755	-	12	270	36	87	48	357	0.25	0.76	up	1.128975473339508e-11	True	21967752	3	True	21968228, 21971002	2	NA
CDKN2A	chr9	LIHC	21967992	-	42	243	6	114	48	357	0.88	0.68	down	0.0042368331178507706	True	21967995	3	True	21968208, 21968228, 21971002	3	NA
CDKN2A	chr9	LIHC	21968200	-	14	55	34	302	48	357	0.29	0.15	down	0.023888258799588488	False	21968180	20	True	21968228, 21974476	2	NA
CDKN2A	chr9	LIHC	21968733	-	4	145	44	212	48	357	0.08	0.41	up	4.120782143243499e-06	True	21968723	10	True	21968724	1	9
CDKN2A	chr9	LIHC	21969564	-	1	110	47	247	48	357	0.02	0.31	up	2.9133820711445286e-06	True	21969568	4	True	21969731	1	167
CDKN2A	chr9	LIHC	21970697	-	1	94	47	263	48	357	0.02	0.26	up	3.521468810792137e-05	True	21970715	18	True	21970890	1	193
CDKN2A	chr9	PRAD	21967755	-	11	250	34	206	45	456	0.24	0.55	up	0.00012571703883149126	True	21967752	3	True	21968228, 21971002	2	NA
CDKN2A	chr9	PRAD	21967992	-	36	261	9	195	45	456	0.80	0.57	down	0.003757467037955635	True	21967995	3	True	21968208, 21968228, 21971002	3	NA
CDKN2A	chr9	PRAD	21968200	-	10	52	35	404	45	456	0.22	0.11	down	0.053437804156103184	False	21968180	20	True	21968228, 21974476	2	NA
CDKN2A	chr9	PRAD	21968733	-	11	115	34	341	45	456	0.24	0.25	up	1.0	False	21968723	10	True	21968724	1	9
CDKN2A	chr9	PRAD	21969564	-	5	119	40	337	45	456	0.11	0.26	up	0.028767032625619537	False	21969568	4	True	21969731	1	167
CDKN2A	chr9	PRAD	21970697	-	5	80	40	376	45	456	0.11	0.18	up	0.40344402612201374	False	21970715	18	True	21970890	1	193
CDKN2A	chr9	THCA	21967755	-	4	229	54	234	58	463	0.07	0.49	up	3.510491551378635e-11	True	21967752	3	True	21968228, 21971002	2	NA
CDKN2A	chr9	THCA	21967992	-	56	321	2	142	58	463	0.97	0.69	down	1.250510259853656e-06	True	21967995	3	True	21968208, 21968228, 21971002	3	NA
CDKN2A	chr9	THCA	21968200	-	23	72	35	391	58	463	0.40	0.16	down	4.0512989299509474e-05	True	21968180	20	True	21968228, 21974476	2	NA
CDKN2A	chr9	THCA	21968733	-	4	122	54	341	58	463	0.07	0.26	up	0.0005317877030710744	True	21968723	10	True	21968724	1	9
CDKN2A	chr9	THCA	21969564	-	3	124	55	339	58	463	0.05	0.27	up	7.727195429626522e-05	True	21969568	4	True	21969731	1	167
CDKN2A	chr9	THCA	21970697	-	4	129	54	334	58	463	0.07	0.28	up	0.00020340573163388182	True	21970715	18	True	21970890	1	193
CDKN2C	chr1	LIHC	51439973	+	1	65	45	290	46	355	0.02	0.18	up	0.002640391617758728	True	51440230	257	False	51439942	1	NA
CDKN2C	chr1	LIHC	51440214	+	16	41	30	314	46	355	0.35	0.12	down	0.00013851357739800316	True	51440230	16	True	51439942	1	272
CDKN2C	chr1	LIHC	51440306	+	40	353	6	2	46	355	0.87	0.99	up	3.9324267796388504e-05	True	51440305	1	True	51439942	1	364
CHURC1	chr14	LUAD	65320759	+	0	1	58	527	58	528	0.00	0.00	up	1.0	False	65397656	76897	False	65397616	1	NA
CHURC1	chr14	LUAD	65390708	+	0	1	58	527	58	528	0.00	0.00	up	1.0	False	65397656	6948	False	65397616	1	NA
CHURC1	chr14	LUAD	65392873	+	0	1	58	527	58	528	0.00	0.00	up	1.0	False	65397656	4783	False	65397616	1	NA
CHURC1	chr14	LUAD	65397656	+	15	218	43	310	58	528	0.26	0.41	up	0.023818361802283684	False	65397656	0	True	65397616	1	40
CHURC1	chr14	LUAD	65399029	+	54	509	4	19	58	528	0.93	0.96	up	0.2710564513037931	False	65399038	9	True	65398917	1	112
CHURC1	chr14	LUAD	65399270	+	0	1	58	527	58	528	0.00	0.00	up	1.0	False	65399038	232	False	65398917	1	NA
CHURC1	chr14	LUAD	65399371	+	7	53	51	475	58	528	0.12	0.10	down	0.6470041411828535	False	65399038	333	False	65398917	1	NA
CHURC1	chr14	LUAD	65399508	+	0	10	58	518	58	528	0.00	0.02	up	0.6092329693643859	False	65399038	470	False	65398917	1	NA
CHURC1	chr14	LUAD	65401114	+	13	168	45	360	58	528	0.22	0.32	up	0.17747179156588375	False	65401103	11	True	65398948	1	2166
CHURC1	chr14	LUAD	65401911	+	24	346	34	182	58	528	0.41	0.66	up	0.0004895957210975485	True	65401913	2	True	65398948	1	2963
CHURC1	chr14	LUAD	65402086	+	33	179	25	349	58	528	0.57	0.34	down	0.0008246157925126031	True	65402086	0	True	65398948	1	3138
CHURC1	chr14	LUAD	65410756	+	19	236	39	292	58	528	0.33	0.45	up	0.094281959988669	False	65410775	19	True	65410130	1	626
CHURC1	chr14	LUAD	65411291	+	27	188	31	340	58	528	0.47	0.36	down	0.11463352794370303	False	65411310	19	True	65410039	1	1252
CHURC1	chr14	LUSC	65382073	+	0	1	51	503	51	504	0.00	0.00	up	1.0	False	65397656	15583	False	65397616	1	NA
CHURC1	chr14	LUSC	65392873	+	0	5	51	499	51	504	0.00	0.01	up	1.0	False	65397656	4783	False	65397616	1	NA
CHURC1	chr14	LUSC	65397656	+	23	201	28	303	51	504	0.45	0.40	down	0.5494644430829889	False	65397656	0	True	65397616	1	40
CHURC1	chr14	LUSC	65399029	+	51	500	0	4	51	504	1.00	0.99	down	1.0	False	65399038	9	True	65398917	1	112
CHURC1	chr14	LUSC	65399270	+	1	6	50	498	51	504	0.02	0.01	down	0.4926749958992444	False	65399038	232	False	65398917	1	NA
CHURC1	chr14	LUSC	65399371	+	5	59	46	445	51	504	0.10	0.12	up	0.8207312750590096	False	65399038	333	False	65398917	1	NA
CHURC1	chr14	LUSC	65399508	+	0	19	51	485	51	504	0.00	0.04	up	0.2421836156375883	False	65399038	470	False	65398917	1	NA
CHURC1	chr14	LUSC	65401114	+	30	156	21	348	51	504	0.59	0.31	down	0.00013447099137490546	True	65401103	11	True	65398948	1	2166
CHURC1	chr14	LUSC	65401911	+	19	358	32	146	51	504	0.37	0.71	up	2.544029462634244e-06	True	65401913	2	True	65398948	1	2963
CHURC1	chr14	LUSC	65402086	+	28	136	23	368	51	504	0.55	0.27	down	7.838425591671065e-05	True	65402086	0	True	65398948	1	3138
CHURC1	chr14	LUSC	65410756	+	31	254	20	250	51	504	0.61	0.50	down	0.18612979832440185	False	65410775	19	True	65410130	1	626
CHURC1	chr14	LUSC	65411291	+	19	163	32	341	51	504	0.37	0.32	down	0.5316101473880535	False	65411310	19	True	65410039	1	1252
DRAM1	chr12	LUAD	102295333	+	6	43	52	484	58	527	0.10	0.08	down	0.6149272357989845	False	102302106	6773	False	102283881	1	NA
DRAM1	chr12	LUAD	102298553	+	1	0	57	527	58	527	0.02	0.00	down	0.09914529914532128	False	102302106	3553	False	102283881	1	NA
DRAM1	chr12	LUAD	102302115	+	20	126	38	401	58	527	0.34	0.24	down	0.08077507639515491	False	102302106	9	True	102283881	1	18234
DRAM1	chr12	LUAD	102302202	+	3	13	55	514	58	527	0.05	0.02	down	0.20519300684191855	False	102302106	96	False	102283881	1	NA
DRAM1	chr12	LUAD	102308145	+	0	1	58	526	58	527	0.00	0.00	up	1.0	False	102302106	6039	False	102283881	1	NA
DRAM1	chr12	LUAD	102315343	+	41	235	17	292	58	527	0.71	0.45	down	0.00016210979031767043	True	102315320	23	True	102307954	1	7389
DRAM1	chr12	LUAD	102315591	+	14	109	44	418	58	527	0.24	0.21	down	0.5025890011505866	False	102315592	1	True	102315038	1	553
DRAM1	chr12	LUAD	102316117	+	2	21	56	506	58	527	0.03	0.04	up	1.0	False	102315592	525	False	102315038	1	NA
DRAM1	chr12	LUAD	102316512	+	12	60	46	467	58	527	0.21	0.11	down	0.055405698537142466	False	102317401	889	False	102315038	1	NA
DRAM1	chr12	LUAD	102316890	+	17	163	41	364	58	527	0.29	0.31	up	0.8814320337430227	False	102317401	511	False	102315038	1	NA
DRAM1	chr12	LUAD	102317390	+	58	517	0	10	58	527	1.00	0.98	down	0.6092252601036094	False	102317401	11	True	102315038	1	2352
DRAM1	chr12	LUAD	102346442	+	0	1	58	526	58	527	0.00	0.00	up	1.0	False	102317401	29041	False	102315038	1	NA
DRAM1	chr12	LUAD	102405916	+	13	213	45	314	58	527	0.22	0.40	up	0.006973166033341465	True	102405909	7	True	102405641	1	275
DRAM1	chr12	LUSC	102295333	+	6	42	45	460	51	502	0.12	0.08	down	0.4302388456454464	False	102302106	6773	False	102283881	1	NA
DRAM1	chr12	LUSC	102302115	+	26	34	25	468	51	502	0.51	0.07	down	1.2051160055158215e-14	True	102302106	9	True	102283881	1	18234
DRAM1	chr12	LUSC	102302202	+	1	5	50	497	51	502	0.02	0.01	down	0.4419587226356632	False	102302106	96	False	102283881	1	NA
DRAM1	chr12	LUSC	102308145	+	0	1	51	501	51	502	0.00	0.00	up	1.0	False	102302106	6039	False	102283881	1	NA
DRAM1	chr12	LUSC	102315343	+	37	142	14	360	51	502	0.73	0.28	down	7.292190033507884e-10	True	102315320	23	True	102307954	1	7389
DRAM1	chr12	LUSC	102315591	+	21	40	30	462	51	502	0.41	0.08	down	2.6762995170451544e-09	True	102315592	1	True	102315038	1	553
DRAM1	chr12	LUSC	102316117	+	2	8	49	494	51	502	0.04	0.02	down	0.23333487055551896	False	102315592	525	False	102315038	1	NA
DRAM1	chr12	LUSC	102316512	+	8	12	43	490	51	502	0.16	0.02	down	0.00016207439238119425	True	102317401	889	False	102315038	1	NA
DRAM1	chr12	LUSC	102316890	+	8	125	43	377	51	502	0.16	0.25	up	0.16991009987399094	False	102317401	511	False	102315038	1	NA
DRAM1	chr12	LUSC	102317390	+	51	496	0	6	51	502	1.00	0.99	down	1.0	False	102317401	11	True	102315038	1	2352
DRAM1	chr12	LUSC	102405916	+	9	225	42	277	51	502	0.18	0.45	up	0.0001528650834667907	True	102405909	7	True	102405641	1	275
EZH2	chr7	BRCA	148504477	-	81	1051	24	42	105	1093	0.77	0.96	up	1.0358076035884905e-10	True	148504477	0	True	148504738, 148516131	2	NA
EZH2	chr7	BRCA	148504561	-	51	200	54	893	105	1093	0.49	0.18	down	3.412168328524223e-11	True	148504574	13	True	148504738	1	177
EZH2	chr7	BRCA	148514434	-	0	3	105	1090	105	1093	0.00	0.00	up	1.0	False	148515129	695	False	148516131, 148529833	2	NA
EZH2	chr7	BRCA	148515148	-	14	93	91	1000	105	1093	0.13	0.09	down	0.10620268257137036	False	148515129	19	True	148516131, 148529833	2	NA
EZH2	chr7	KIRC	148504477	-	38	458	26	39	64	497	0.59	0.92	up	8.44904433266864e-11	True	148504477	0	True	148504738, 148516131	2	NA
EZH2	chr7	KIRC	148504561	-	48	137	16	360	64	497	0.75	0.28	down	2.585993130987022e-13	True	148504574	13	True	148504738	1	177
EZH2	chr7	KIRC	148515148	-	23	42	41	455	64	497	0.36	0.08	down	2.9794012252841174e-08	True	148515129	19	True	148516131, 148529833	2	NA
EZH2	chr7	KIRC	148526831	-	0	1	64	496	64	497	0.00	0.00	up	1.0	False	148515129	11702	False	148516131, 148529833	2	NA
EZH2	chr7	KIRP	148504477	-	20	243	9	25	29	268	0.69	0.91	up	0.0022718511749438746	True	148504477	0	True	148504738, 148516131	2	NA
EZH2	chr7	KIRP	148504561	-	23	76	6	192	29	268	0.79	0.28	down	1.163409423554372e-07	True	148504574	13	True	148504738	1	177
EZH2	chr7	KIRP	148515148	-	11	49	18	219	29	268	0.38	0.18	down	0.02509642778031668	False	148515129	19	True	148516131, 148529833	2	NA
EZH2	chr7	LIHC	148504477	-	24	343	24	13	48	356	0.50	0.96	up	1.7534520134182692e-16	True	148504477	0	True	148504738, 148516131	2	NA
EZH2	chr7	LIHC	148504561	-	33	72	15	284	48	356	0.69	0.20	down	2.972726838133612e-11	True	148504574	13	True	148504738	1	177
EZH2	chr7	LIHC	148514434	-	0	1	48	355	48	356	0.00	0.00	up	1.0	False	148515129	695	False	148516131, 148529833	2	NA
EZH2	chr7	LIHC	148515148	-	29	55	19	301	48	356	0.60	0.15	down	1.1205980608999584e-10	True	148515129	19	True	148516131, 148529833	2	NA
EZH2	chr7	LUAD	148504477	-	37	470	19	28	56	498	0.66	0.94	up	5.250864214910113e-09	True	148504477	0	True	148504738, 148516131	2	NA
EZH2	chr7	LUAD	148504561	-	35	132	21	366	56	498	0.62	0.27	down	1.3316785284424733e-07	True	148504574	13	True	148504738	1	177
EZH2	chr7	LUAD	148515148	-	22	57	34	441	56	498	0.39	0.11	down	7.244660747482358e-07	True	148515129	19	True	148516131, 148529833	2	NA
EZH2	chr7	PRAD	148504477	-	36	444	13	31	49	475	0.73	0.93	up	5.1440970799901895e-05	True	148504477	0	True	148504738, 148516131	2	NA
EZH2	chr7	PRAD	148504561	-	31	103	18	372	49	475	0.63	0.22	down	4.609162131734974e-09	True	148504574	13	True	148504738	1	177
EZH2	chr7	PRAD	148515148	-	26	81	23	394	49	475	0.53	0.17	down	8.451098827072141e-08	True	148515129	19	True	148516131, 148529833	2	NA
EZH2	chr7	THCA	148504477	-	35	428	22	54	57	482	0.61	0.89	up	7.958951025364681e-07	True	148504477	0	True	148504738, 148516131	2	NA
EZH2	chr7	THCA	148504561	-	36	151	21	331	57	482	0.63	0.31	down	5.60437538576275e-06	True	148504574	13	True	148504738	1	177
EZH2	chr7	THCA	148514434	-	0	1	57	481	57	482	0.00	0.00	up	1.0	False	148515129	695	False	148516131, 148529833	2	NA
EZH2	chr7	THCA	148515148	-	18	109	39	373	57	482	0.32	0.23	down	0.13896324659937487	False	148515129	19	True	148516131, 148529833	2	NA
FGF2	chr4	BRCA	123813648	+	11	50	59	561	70	611	0.16	0.08	down	0.04592035951086471	False	123816619	2971	False	123813551	1	NA
FGF2	chr4	BRCA	123815953	+	1	1	69	610	70	611	0.01	0.00	down	0.195149866113645	False	123816619	666	False	123813551	1	NA
FGF2	chr4	BRCA	123816621	+	15	355	55	256	70	611	0.21	0.58	up	4.132384585520452e-09	True	123816619	2	True	123813551	1	3070
FGF2	chr4	BRCA	123817951	+	0	1	70	610	70	611	0.00	0.00	up	1.0	False	123816619	1332	False	123813551	1	NA
FGF2	chr4	BRCA	123818762	+	2	1	68	610	70	611	0.03	0.00	down	0.02920138490017501	False	123819391	629	False	123813551	1	NA
FGF2	chr4	BRCA	123819379	+	66	341	4	270	70	611	0.94	0.56	down	1.2696694807154064e-11	True	123819391	12	True	123813551	1	5828
FGF2	chr4	LUAD	123813648	+	1	13	29	264	30	277	0.03	0.05	up	1.0	False	123816619	2971	False	123813551	1	NA
FGF2	chr4	LUAD	123816621	+	11	194	19	83	30	277	0.37	0.70	up	0.00041609363981238767	True	123816619	2	True	123813551	1	3070
FGF2	chr4	LUAD	123819379	+	24	135	6	142	30	277	0.80	0.49	down	0.0010168896951193687	True	123819391	12	True	123813551	1	5828
FGF2	chr4	LUSC	123813648	+	2	66	26	250	28	316	0.07	0.21	up	0.08731039546550934	False	123816619	2971	False	123813551	1	NA
FGF2	chr4	LUSC	123815953	+	1	3	27	313	28	316	0.04	0.01	down	0.2890507926267912	False	123816619	666	False	123813551	1	NA
FGF2	chr4	LUSC	123816621	+	9	230	19	86	28	316	0.32	0.73	up	2.3557538752139402e-05	True	123816619	2	True	123813551	1	3070
FGF2	chr4	LUSC	123819379	+	20	112	8	204	28	316	0.71	0.35	down	0.0003612788584604317	True	123819391	12	True	123813551	1	5828
FGF2	chr4	PRAD	123813648	+	5	23	31	265	36	288	0.14	0.08	down	0.2174989860341019	False	123816619	2971	False	123813551	1	NA
FGF2	chr4	PRAD	123814916	+	0	2	36	286	36	288	0.00	0.01	up	1.0	False	123816619	1703	False	123813551	1	NA
FGF2	chr4	PRAD	123815953	+	0	1	36	287	36	288	0.00	0.00	up	1.0	False	123816619	666	False	123813551	1	NA
FGF2	chr4	PRAD	123816621	+	13	180	23	108	36	288	0.36	0.62	up	0.003518611590130506	True	123816619	2	True	123813551	1	3070
FGF2	chr4	PRAD	123817951	+	0	1	36	287	36	288	0.00	0.00	up	1.0	False	123816619	1332	False	123813551	1	NA
FGF2	chr4	PRAD	123818762	+	2	1	34	287	36	288	0.06	0.00	down	0.03357712268736582	False	123819391	629	False	123813551	1	NA
FGF2	chr4	PRAD	123819379	+	30	148	6	140	36	288	0.83	0.51	down	0.0002779598546175558	True	123819391	12	True	123813551	1	5828
FGFR2	chr10	COAD	123237846	-	39	276	2	35	41	311	0.95	0.89	down	0.28381030020517883	False	123237848	2	True	123239095, 123239371	2	NA
FGFR2	chr10	COAD	123238495	-	3	3	38	308	41	311	0.07	0.01	down	0.02293313032069089	False	123238586	91	False	123239371	1	NA
FGFR2	chr10	COAD	123238591	-	3	51	38	260	41	311	0.07	0.16	up	0.16729884670147366	False	123238586	5	True	123239371	1	780
FGFR2	chr10	COAD	123238732	-	9	113	32	198	41	311	0.22	0.36	up	0.08110936513465891	False	123238736	4	True	123239371, 123276964	2	NA
FGFR2	chr10	COAD	123239113	-	7	53	34	258	41	311	0.17	0.17	down	1.0	False	123239133	20	True	123239371	1	258
FGFR2	chr10	COAD	123239386	-	7	53	34	258	41	311	0.17	0.17	down	1.0	False	123239370	16	True	123239371, 123239391	2	NA
FGFR2	chr10	COAD	123239557	-	3	151	38	160	41	311	0.07	0.49	up	1.327630124736825e-07	True	123239564	7	True	123239565	1	8
FGFR2	chr10	COAD	123241195	-	0	1	41	310	41	311	0.00	0.00	up	1.0	False	123241349	154	False	123241686	1	NA
FGFR2	chr10	COAD	123241383	-	22	49	19	262	41	311	0.54	0.16	down	3.198640921392868e-07	True	123241370	13	True	123241686	1	303
FGFR2	chr10	COAD	123297483	-	5	17	36	294	41	311	0.12	0.05	down	0.15771222413128638	False	123297480	3	True	123297908	1	425
FGFR2	chr10	COAD	123323838	-	0	1	41	310	41	311	0.00	0.00	up	1.0	False	123297480	26358	False	123297908	1	NA
FGFR2	chr10	KIRC	123237846	-	71	519	0	19	71	538	1.00	0.96	down	0.15021827245679165	False	123237848	2	True	123239095, 123239371	2	NA
FGFR2	chr10	KIRC	123238495	-	4	12	67	526	71	538	0.06	0.02	down	0.10440086533582027	False	123238586	91	False	123239371	1	NA
FGFR2	chr10	KIRC	123238591	-	9	52	62	486	71	538	0.13	0.10	down	0.4033754158457916	False	123238586	5	True	123239371	1	780
FGFR2	chr10	KIRC	123238732	-	28	129	43	409	71	538	0.39	0.24	down	0.008781981884184293	True	123238736	4	True	123239371, 123276964	2	NA
FGFR2	chr10	KIRC	123239113	-	20	83	51	455	71	538	0.28	0.15	down	0.010922394961078377	False	123239133	20	True	123239371	1	258
FGFR2	chr10	KIRC	123239386	-	18	57	53	481	71	538	0.25	0.11	down	0.001552414813950295	True	123239370	16	True	123239371, 123239391	2	NA
FGFR2	chr10	KIRC	123239557	-	8	143	63	395	71	538	0.11	0.27	up	0.005010923089654262	True	123239564	7	True	123239565	1	8
FGFR2	chr10	KIRC	123241195	-	0	1	71	537	71	538	0.00	0.00	up	1.0	False	123241349	154	False	123241686	1	NA
FGFR2	chr10	KIRC	123241383	-	28	141	43	397	71	538	0.39	0.26	down	0.023843012222910392	False	123241370	13	True	123241686	1	303
FGFR2	chr10	KIRC	123297483	-	10	35	61	503	71	538	0.14	0.07	down	0.02964042234838285	False	123297480	3	True	123297908	1	425
FGFR2	chr10	KIRC	123323838	-	1	3	70	535	71	538	0.01	0.01	down	0.3917348342218809	False	123297480	26358	False	123297908	1	NA
FGFR2	chr10	LUAD	123237846	-	58	493	0	32	58	525	1.00	0.94	down	0.06250997987532994	False	123237848	2	True	123239095, 123239371	2	NA
FGFR2	chr10	LUAD	123238495	-	1	15	57	510	58	525	0.02	0.03	up	1.0	False	123238586	91	False	123239371	1	NA
FGFR2	chr10	LUAD	123238591	-	3	75	55	450	58	525	0.05	0.14	up	0.0650091952804607	False	123238586	5	True	123239371	1	780
FGFR2	chr10	LUAD	123238732	-	24	168	34	357	58	525	0.41	0.32	down	0.18452669680644745	False	123238736	4	True	123239371, 123276964	2	NA
FGFR2	chr10	LUAD	123239113	-	8	89	50	436	58	525	0.14	0.17	up	0.7099547157545478	False	123239133	20	True	123239371	1	258
FGFR2	chr10	LUAD	123239386	-	4	83	54	442	58	525	0.07	0.16	up	0.08028757741166419	False	123239370	16	True	123239371, 123239391	2	NA
FGFR2	chr10	LUAD	123239557	-	10	231	48	294	58	525	0.17	0.44	up	6.26296357108243e-05	True	123239564	7	True	123239565	1	8
FGFR2	chr10	LUAD	123241195	-	0	3	58	522	58	525	0.00	0.01	up	1.0	False	123241349	154	False	123241686	1	NA
FGFR2	chr10	LUAD	123241383	-	21	101	37	424	58	525	0.36	0.19	down	0.005720571933232382	True	123241370	13	True	123241686	1	303
FGFR2	chr10	LUAD	123297483	-	10	44	48	481	58	525	0.17	0.08	down	0.05118210338922425	False	123297480	3	True	123297908	1	425
FGFR2	chr10	PRAD	123237846	-	52	482	0	22	52	504	1.00	0.96	down	0.2508498201520827	False	123237848	2	True	123239095, 123239371	2	NA
FGFR2	chr10	PRAD	123238495	-	1	16	51	488	52	504	0.02	0.03	up	1.0	False	123238586	91	False	123239371	1	NA
FGFR2	chr10	PRAD	123238591	-	3	55	49	449	52	504	0.06	0.11	up	0.3416296048691113	False	123238586	5	True	123239371	1	780
FGFR2	chr10	PRAD	123238732	-	25	150	27	354	52	504	0.48	0.30	down	0.011318111461671556	False	123238736	4	True	123239371, 123276964	2	NA
FGFR2	chr10	PRAD	123239113	-	6	72	46	432	52	504	0.12	0.14	up	0.6801150596642358	False	123239133	20	True	123239371	1	258
FGFR2	chr10	PRAD	123239386	-	7	65	45	439	52	504	0.13	0.13	down	0.8306059972364971	False	123239370	16	True	123239371, 123239391	2	NA
FGFR2	chr10	PRAD	123239557	-	5	197	47	307	52	504	0.10	0.39	up	7.27596088337097e-06	True	123239564	7	True	123239565	1	8
FGFR2	chr10	PRAD	123241195	-	0	1	52	503	52	504	0.00	0.00	up	1.0	False	123241349	154	False	123241686	1	NA
FGFR2	chr10	PRAD	123241383	-	17	76	35	428	52	504	0.33	0.15	down	0.0028054752687299103	True	123241370	13	True	123241686	1	303
FGFR2	chr10	PRAD	123297483	-	3	17	49	487	52	504	0.06	0.03	down	0.42048269697794505	False	123297480	3	True	123297908	1	425
FGFR2	chr10	PRAD	123323838	-	0	1	52	503	52	504	0.00	0.00	up	1.0	False	123297480	26358	False	123297908	1	NA
FLT3	chr13	BRCA	28577411	-	11	212	82	683	93	895	0.12	0.24	up	0.008735506212967311	True	28577412	1	True	28578189	1	778
FLT3	chr13	BRCA	28577772	-	71	667	22	228	93	895	0.76	0.75	down	0.8022813099435806	False	28577751	21	True	28599540	1	21768
FLT3	chr13	BRCA	28577921	-	46	319	47	576	93	895	0.49	0.36	down	0.009529832189914149	True	28577930	9	True	28578189	1	268
FLT3	chr13	BRCA	28602111	-	0	1	93	894	93	895	0.00	0.00	up	1.0	False	28577930	24181	False	28578189	1	NA
FLT3	chr13	BRCA	28623675	-	0	1	93	894	93	895	0.00	0.00	up	1.0	False	28577930	45745	False	28578189	1	NA
FLT3	chr13	KICH	28577411	-	1	0	14	19	15	19	0.07	0.00	down	0.4411764705882352	False	28577412	1	True	28578189	1	778
FLT3	chr13	KICH	28577772	-	12	4	3	15	15	19	0.80	0.21	down	0.0014283180990150098	True	28577751	21	True	28599540	1	21768
FLT3	chr13	KICH	28577921	-	6	17	9	2	15	19	0.40	0.89	up	0.003459862810530216	True	28577930	9	True	28578189	1	268
GNAS	chr20	BRCA	57430390	+	69	580	45	562	114	1142	0.61	0.51	down	0.049668510344482206	False	57430389	1	True	57430388	1	2
GNAS	chr20	BRCA	57431602	+	0	4	114	1138	114	1142	0.00	0.00	up	1.0	False	57432246	644	False	57430703	1	NA
GNAS	chr20	BRCA	57432237	+	23	123	91	1019	114	1142	0.20	0.11	down	0.0052831721948749	True	57432246	9	True	57430703	1	1534
GNAS	chr20	BRCA	57467991	+	0	4	114	1138	114	1142	0.00	0.00	up	1.0	False	57475465	7474	False	57415899, 57475010	2	NA
GNAS	chr20	BRCA	57475465	+	23	471	91	671	114	1142	0.20	0.41	up	7.548234854128752e-06	True	57475465	0	True	57415899, 57475010	2	NA
GNAS	chr20	BRCA	57478602	+	114	1133	0	9	114	1142	1.00	0.99	down	1.0	False	57478599	3	True	57415899	1	62703
GNAS	chr20	BRCA	57480516	+	113	1128	1	14	114	1142	0.99	0.99	down	1.0	False	57480536	20	True	57415899	1	64617
GNAS	chr20	BRCA	57485913	+	7	211	107	931	114	1142	0.06	0.18	up	0.00040079774945910176	True	57486247	334	False	57415899, 57485884	2	NA
GNAS	chr20	BRCA	57486247	+	114	1142	0	0	114	1142	1.00	1.00	down	1.0	False	57486247	0	True	57415899, 57485884	2	NA
GNAS	chr20	BRCA	57493005	+	0	5	114	1137	114	1142	0.00	0.00	up	1.0	False	57486247	6758	False	57415899, 57485884	2	NA
GNAS	chr20	BRCA	57497116	+	0	4	114	1138	114	1142	0.00	0.00	up	1.0	False	57486247	10869	False	57415899, 57485884	2	NA
GNAS	chr20	KICH	57430390	+	11	1	14	65	25	66	0.44	0.02	down	9.489272575523407e-07	True	57430389	1	True	57430388	1	2
GNAS	chr20	KICH	57432237	+	6	5	19	61	25	66	0.24	0.08	down	0.06460298234388426	False	57432246	9	True	57430703	1	1534
GNAS	chr20	KICH	57467991	+	2	0	23	66	25	66	0.08	0.00	down	0.07326007326007315	False	57475465	7474	False	57415899, 57475010	2	NA
GNAS	chr20	KICH	57475465	+	14	47	11	19	25	66	0.56	0.71	up	0.21324763060565047	False	57475465	0	True	57415899, 57475010	2	NA
GNAS	chr20	KICH	57478602	+	25	66	0	0	25	66	1.00	1.00	down	1.0	False	57478599	3	True	57415899	1	62703
GNAS	chr20	KICH	57480516	+	25	66	0	0	25	66	1.00	1.00	down	1.0	False	57480536	20	True	57415899	1	64617
GNAS	chr20	KICH	57485913	+	4	33	21	33	25	66	0.16	0.50	up	0.0038343464956872024	True	57486247	334	False	57415899, 57485884	2	NA
GNAS	chr20	KICH	57486247	+	25	66	0	0	25	66	1.00	1.00	down	1.0	False	57486247	0	True	57415899, 57485884	2	NA
HNF1A	chr12	COAD	121434955	+	11	146	22	155	33	301	0.33	0.49	up	0.10257903785096346	False	121434969	14	True	121434799	1	156
HNF1A	chr12	COAD	121435704	+	26	149	7	152	33	301	0.79	0.50	down	0.0015286870407827011	True	121435685	19	True	121434095, 121434133, 121434473, 121435596	4	NA
HNF1A	chr12	COAD	121436097	+	3	97	30	204	33	301	0.09	0.32	up	0.004618145963008264	True	121436103	6	True	121434799, 121435596	2	NA
HNF1A	chr12	COAD	121439078	+	5	60	28	241	33	301	0.15	0.20	up	0.6459386021188075	False	121439072	6	True	121438995	1	83
HNF1A	chr12	COAD	121440315	+	21	234	12	67	33	301	0.64	0.78	up	0.0841431348533481	False	121440315	0	True	121431356, 121434489, 121438995	3	NA
HNF1A	chr12	LUAD	121434955	+	0	54	31	252	31	306	0.00	0.18	up	0.007714052836623577	True	121434969	14	True	121434799	1	156
HNF1A	chr12	LUAD	121435704	+	0	94	31	212	31	306	0.00	0.31	up	3.0657670041719524e-05	True	121435685	19	True	121434095, 121434133, 121434473, 121435596	4	NA
HNF1A	chr12	LUAD	121436097	+	1	23	30	283	31	306	0.03	0.08	up	0.7112062320988283	False	121436103	6	True	121434799, 121435596	2	NA
HNF1A	chr12	LUAD	121439078	+	31	185	0	121	31	306	1.00	0.60	down	5.598360088520211e-07	True	121439072	6	True	121438995	1	83
HNF1A	chr12	LUAD	121440315	+	0	75	31	231	31	306	0.00	0.25	up	0.0004210827119940432	True	121440315	0	True	121431356, 121434489, 121438995	3	NA
KIT	chr4	COAD	55605200	+	2	83	39	159	41	242	0.05	0.34	up	3.5491533991379634e-05	True	55605177	23	True	55604723	1	477
KIT	chr4	COAD	55606881	+	41	192	0	50	41	242	1.00	0.79	down	0.00025295412735229744	True	55606881	0	True	55604723	1	2158
KRAS	chr12	BRCA	25357557	-	0	2	64	953	64	955	0.00	0.00	up	1.0	False	25357723	166	False	25362729	1	NA
KRAS	chr12	BRCA	25357727	-	11	60	53	895	64	955	0.17	0.06	down	0.003220843309049666	True	25357723	4	True	25362729	1	5002
KRAS	chr12	BRCA	25358180	-	24	584	40	371	64	955	0.38	0.61	up	0.00031162443897125603	True	25357723	457	False	25362729	1	NA
KRAS	chr12	BRCA	25358304	-	0	1	64	954	64	955	0.00	0.00	up	1.0	False	25357723	581	False	25362729	1	NA
KRAS	chr12	BRCA	25359347	-	2	16	62	939	64	955	0.03	0.02	down	0.3138067362369717	False	25357723	1624	False	25362729	1	NA
KRAS	chr12	BRCA	25359733	-	0	14	64	941	64	955	0.00	0.01	up	1.0	False	25357723	2010	False	25362729	1	NA
KRAS	chr12	BRCA	25359865	-	18	461	46	494	64	955	0.28	0.48	up	0.0017895508638143185	True	25357723	2142	False	25362729	1	NA
KRAS	chr12	BRCA	25360581	-	0	2	64	953	64	955	0.00	0.00	up	1.0	False	25362102	1521	False	25362729	1	NA
KRAS	chr12	BRCA	25361293	-	2	64	62	891	64	955	0.03	0.07	up	0.4268007779467444	False	25362102	809	False	25362729	1	NA
KRAS	chr12	BRCA	25361772	-	0	2	64	953	64	955	0.00	0.00	up	1.0	False	25362102	330	False	25362729	1	NA
KRAS	chr12	BRCA	25361885	-	1	3	63	952	64	955	0.02	0.00	down	0.2288391516426721	False	25362102	217	False	25362729	1	NA
KRAS	chr12	BRCA	25362098	-	28	375	36	580	64	955	0.44	0.39	down	0.5101260870006892	False	25362102	4	True	25362729	1	631
KRAS	chr12	BRCA	25362377	-	9	214	55	741	64	955	0.14	0.22	up	0.15842311378423915	False	25362365	12	True	25368375	1	5998
KRAS	chr12	BRCA	25368385	-	1	0	63	955	64	955	0.02	0.00	down	0.06280667320911823	False	25362365	6020	False	25368375	1	NA
KRAS	chr12	BRCA	25378427	-	0	2	64	953	64	955	0.00	0.00	up	1.0	False	25386753	8326	False	25388140	1	NA
KRAS	chr12	BRCA	25378506	-	0	1	64	954	64	955	0.00	0.00	up	1.0	False	25386753	8247	False	25388140	1	NA
KRAS	chr12	BRCA	25378651	-	0	1	64	954	64	955	0.00	0.00	up	1.0	False	25386753	8102	False	25388140	1	NA
KRAS	chr12	BRCA	25386777	-	12	125	52	830	64	955	0.19	0.13	down	0.18888914999989287	False	25386753	24	True	25388140	1	1363
KRAS	chr12	BRCA	25392460	-	0	1	64	954	64	955	0.00	0.00	up	1.0	False	25386753	5707	False	25388140	1	NA
KRAS	chr12	PRAD	25357557	-	0	5	49	444	49	449	0.00	0.01	up	1.0	False	25357723	166	False	25362729	1	NA
KRAS	chr12	PRAD	25357727	-	5	31	44	418	49	449	0.10	0.07	down	0.3827203267011364	False	25357723	4	True	25362729	1	5002
KRAS	chr12	PRAD	25358180	-	37	282	12	167	49	449	0.76	0.63	down	0.08587615198530871	False	25357723	457	False	25362729	1	NA
KRAS	chr12	PRAD	25359347	-	2	6	47	443	49	449	0.04	0.01	down	0.18118380311130364	False	25357723	1624	False	25362729	1	NA
KRAS	chr12	PRAD	25359733	-	5	8	44	441	49	449	0.10	0.02	down	0.005294678401818833	True	25357723	2010	False	25362729	1	NA
KRAS	chr12	PRAD	25359865	-	18	246	31	203	49	449	0.37	0.55	up	0.022964125961179232	False	25357723	2142	False	25362729	1	NA
KRAS	chr12	PRAD	25360581	-	0	2	49	447	49	449	0.00	0.00	up	1.0	False	25362102	1521	False	25362729	1	NA
KRAS	chr12	PRAD	25361293	-	2	38	47	411	49	449	0.04	0.08	up	0.4089967330525965	False	25362102	809	False	25362729	1	NA
KRAS	chr12	PRAD	25361885	-	0	1	49	448	49	449	0.00	0.00	up	1.0	False	25362102	217	False	25362729	1	NA
KRAS	chr12	PRAD	25362098	-	14	110	35	339	49	449	0.29	0.24	down	0.6015957269626528	False	25362102	4	True	25362729	1	631
KRAS	chr12	PRAD	25362377	-	3	99	46	350	49	449	0.06	0.22	up	0.008016391709827585	True	25362365	12	True	25368375	1	5998
KRAS	chr12	PRAD	25378651	-	0	1	49	448	49	449	0.00	0.00	up	1.0	False	25386753	8102	False	25388140	1	NA
KRAS	chr12	PRAD	25386777	-	11	91	38	358	49	449	0.22	0.20	down	0.7107980759070968	False	25386753	24	True	25388140	1	1363
KRAS	chr12	PRAD	25387405	-	0	1	49	448	49	449	0.00	0.00	up	1.0	False	25386753	652	False	25388140	1	NA
MAX	chr14	BRCA	65472875	-	77	539	37	603	114	1142	0.68	0.47	down	3.3041714388100594e-05	True	65472892	17	True	65472922	1	47
MAX	chr14	BRCA	65522223	-	0	2	114	1140	114	1142	0.00	0.00	up	1.0	False	65541843	19620	False	65543194, 65544130	2	NA
MAX	chr14	BRCA	65526864	-	0	1	114	1141	114	1142	0.00	0.00	up	1.0	False	65541843	14979	False	65543194, 65544130	2	NA
MAX	chr14	BRCA	65537066	-	0	1	114	1141	114	1142	0.00	0.00	up	1.0	False	65541843	4777	False	65543194, 65544130	2	NA
MAX	chr14	BRCA	65541845	-	113	1134	1	8	114	1142	0.99	0.99	up	0.5765134223802004	False	65541843	2	True	65543194, 65544130	2	NA
MAX	chr14	BRCA	65542263	-	55	731	59	411	114	1142	0.48	0.64	up	0.0011279343524779827	True	65542262	1	True	65543194	1	931
MAX	chr14	BRCA	65542791	-	29	222	85	920	114	1142	0.25	0.19	down	0.14007227086092705	False	65542804	13	True	65543194	1	403
MAX	chr14	BRCA	65543174	-	57	572	57	570	114	1142	0.50	0.50	up	1.0	False	65543178	4	True	65543194, 65544130	2	NA
MAX	chr14	BRCA	65544012	-	78	723	36	419	114	1142	0.68	0.63	down	0.3075574169644655	False	65544012	0	True	65544130	1	118
MAX	chr14	BRCA	65544128	-	56	608	58	534	114	1142	0.49	0.53	up	0.4317530109748552	False	65544103	25	False	65544130	1	NA
MAX	chr14	BRCA	65544477	-	35	297	79	845	114	1142	0.31	0.26	down	0.31584407075641513	False	65544492	15	True	65544521	1	44
MAX	chr14	BRCA	65550462	-	69	769	45	373	114	1142	0.61	0.67	up	0.14549154365975106	False	65550462	0	True	65550898	1	436
MAX	chr14	LUAD	65472875	-	30	179	28	349	58	528	0.52	0.34	down	0.009117113856946576	True	65472892	17	True	65472922	1	47
MAX	chr14	LUAD	65516398	-	0	1	58	527	58	528	0.00	0.00	up	1.0	False	65541843	25445	False	65543194, 65544130	2	NA
MAX	chr14	LUAD	65522223	-	0	2	58	526	58	528	0.00	0.00	up	1.0	False	65541843	19620	False	65543194, 65544130	2	NA
MAX	chr14	LUAD	65541845	-	58	520	0	8	58	528	1.00	0.98	down	1.0	False	65541843	2	True	65543194, 65544130	2	NA
MAX	chr14	LUAD	65542263	-	31	343	27	185	58	528	0.53	0.65	up	0.0862061460796048	False	65542262	1	True	65543194	1	931
MAX	chr14	LUAD	65542791	-	5	130	53	398	58	528	0.09	0.25	up	0.004785417761754124	True	65542804	13	True	65543194	1	403
MAX	chr14	LUAD	65543174	-	28	250	30	278	58	528	0.48	0.47	down	0.8909770929901737	False	65543178	4	True	65543194, 65544130	2	NA
MAX	chr14	LUAD	65544012	-	40	363	18	165	58	528	0.69	0.69	down	1.0	False	65544012	0	True	65544130	1	118
MAX	chr14	LUAD	65544128	-	24	261	34	267	58	528	0.41	0.49	up	0.26978465175125155	False	65544103	25	False	65544130	1	NA
MAX	chr14	LUAD	65544477	-	20	124	38	404	58	528	0.34	0.23	down	0.0767089191253038	False	65544492	15	True	65544521	1	44
MAX	chr14	LUAD	65550462	-	35	367	23	161	58	528	0.60	0.70	up	0.1794744823240214	False	65550462	0	True	65550898	1	436
MAX	chr14	LUAD	65560136	-	0	1	58	527	58	528	0.00	0.00	up	1.0	False	65550462	9674	False	65550898	1	NA
MDM4	chr1	LUSC	204502047	+	0	1	50	490	50	491	0.00	0.00	up	1.0	False	204506169	4122	False	204506047	1	NA
MDM4	chr1	LUSC	204503981	+	0	6	50	485	50	491	0.00	0.01	up	1.0	False	204506169	2188	False	204506047	1	NA
MDM4	chr1	LUSC	204506177	+	20	230	30	261	50	491	0.40	0.47	up	0.3755308062428756	False	204506169	8	True	204506047	1	130
MDM4	chr1	LUSC	204513773	+	0	1	50	490	50	491	0.00	0.00	up	1.0	False	204518810	5037	False	204507416	1	NA
MDM4	chr1	LUSC	204518823	+	10	89	40	402	50	491	0.20	0.18	down	0.7038722963762285	False	204518810	13	True	204507416	1	11407
MDM4	chr1	LUSC	204518896	+	1	71	49	420	50	491	0.02	0.14	up	0.008147431803897341	True	204518906	10	True	204518810	1	86
MDM4	chr1	LUSC	204519854	+	0	3	50	488	50	491	0.00	0.01	up	1.0	False	204518906	948	False	204518810	1	NA
MDM4	chr1	LUSC	204520031	+	0	3	50	488	50	491	0.00	0.01	up	1.0	False	204518906	1125	False	204518810	1	NA
MDM4	chr1	LUSC	204521790	+	2	35	48	456	50	491	0.04	0.07	up	0.5626206324568852	False	204518906	2884	False	204518810	1	NA
MDM4	chr1	LUSC	204524096	+	6	97	44	394	50	491	0.12	0.20	up	0.2552411189012712	False	204527248	3152	False	204518810	1	NA
MDM4	chr1	LUSC	204525464	+	1	10	49	481	50	491	0.02	0.02	up	1.0	False	204527248	1784	False	204518810	1	NA
MDM4	chr1	LUSC	204526207	+	0	1	50	490	50	491	0.00	0.00	up	1.0	False	204527248	1041	False	204518810	1	NA
MDM4	chr1	LUSC	204527244	+	45	455	5	36	50	491	0.90	0.93	up	0.5707977208771327	False	204527248	4	True	204518810	1	8434
MDM4	chr1	LUSC	204542871	+	21	91	29	400	50	491	0.42	0.19	down	0.0003375712622751044	True	204542871	0	True	204527809	1	15062
MET	chr7	BRCA	116371866	+	0	1	112	1102	112	1103	0.00	0.00	up	1.0	False	116403135	31269	False	116403134	1	NA
MET	chr7	BRCA	116398156	+	0	1	112	1102	112	1103	0.00	0.00	up	1.0	False	116403135	4979	False	116403134	1	NA
MET	chr7	BRCA	116403123	+	8	155	104	948	112	1103	0.07	0.14	up	0.04128226074580689	False	116403135	12	True	116403134	1	11
MET	chr7	BRCA	116409934	+	22	83	90	1020	112	1103	0.20	0.08	down	0.00011518379317238846	True	116409964	30	False	116409920	1	NA
MET	chr7	BRCA	116436399	+	16	219	96	884	112	1103	0.14	0.20	up	0.1687414635519558	False	116436396	3	True	116436178	1	221
MET	chr7	BRCA	116436629	+	6	216	106	887	112	1103	0.05	0.20	up	5.41325605716331e-05	True	116436654	25	False	116436178	1	NA
MET	chr7	BRCA	116438431	+	110	1015	2	88	112	1103	0.98	0.92	down	0.012705809326573964	False	116438440	9	True	116436178	1	2253
MITF	chr3	BRCA	69801317	+	1	1	113	1137	114	1138	0.01	0.00	down	0.17388389607835147	False	70014400	213083	False	70014399	1	NA
MITF	chr3	BRCA	69987109	+	0	1	114	1137	114	1138	0.00	0.00	up	1.0	False	70014400	27291	False	70014399	1	NA
MITF	chr3	BRCA	70014425	+	6	145	108	993	114	1138	0.05	0.13	up	0.01566705240305097	False	70014400	25	False	70014399	1	NA
MITF	chr3	BRCA	70014745	+	9	180	105	958	114	1138	0.08	0.16	up	0.027095593943264683	False	70014721	24	True	69990394	1	24351
MITF	chr3	BRCA	70014815	+	80	938	34	200	114	1138	0.70	0.82	up	0.0023418615380383628	True	70014819	4	True	70014399	1	416
MITF	chr3	BRCA	70014975	+	71	548	43	590	114	1138	0.62	0.48	down	0.004318510972145329	True	70014975	0	True	70014399	1	576
MITF	chr3	BRCA	70015198	+	57	668	57	470	114	1138	0.50	0.59	up	0.07428019542420547	False	70015180	18	True	70014399	1	799
MITF	chr3	BRCA	70015620	+	1	7	113	1131	114	1138	0.01	0.01	down	0.5351354878522746	False	70015180	440	False	70014399	1	NA
MITF	chr3	BRCA	70016162	+	0	30	114	1108	114	1138	0.00	0.03	up	0.10331426090110768	False	70015180	982	False	70014399	1	NA
MITF	chr3	BRCA	70017179	+	1	0	113	1138	114	1138	0.01	0.00	down	0.0910543130991302	False	70017487	308	False	70014399	1	NA
MITF	chr3	BRCA	70017483	+	109	994	5	144	114	1138	0.96	0.87	down	0.006112462152975843	True	70017487	4	True	70014399	1	3084
MITF	chr3	LUSC	70014425	+	0	87	51	417	51	504	0.00	0.17	up	0.00016648229440887098	True	70014400	25	False	70014399	1	NA
MITF	chr3	LUSC	70014745	+	1	125	50	379	51	504	0.02	0.25	up	2.964065715616169e-05	True	70014721	24	True	69990394	1	24351
MITF	chr3	LUSC	70014815	+	36	424	15	80	51	504	0.71	0.84	up	0.019332220961879903	False	70014819	4	True	70014399	1	416
MITF	chr3	LUSC	70014975	+	29	252	22	252	51	504	0.57	0.50	down	0.38025844169390577	False	70014975	0	True	70014399	1	576
MITF	chr3	LUSC	70015198	+	11	328	40	176	51	504	0.22	0.65	up	1.999834803120464e-09	True	70015180	18	True	70014399	1	799
MITF	chr3	LUSC	70015620	+	1	1	50	503	51	504	0.02	0.00	down	0.17549029173574454	False	70015180	440	False	70014399	1	NA
MITF	chr3	LUSC	70016162	+	2	8	49	496	51	504	0.04	0.02	down	0.23205544222395194	False	70015180	982	False	70014399	1	NA
MITF	chr3	LUSC	70017179	+	0	2	51	502	51	504	0.00	0.00	up	1.0	False	70017487	308	False	70014399	1	NA
MITF	chr3	LUSC	70017483	+	51	423	0	81	51	504	1.00	0.84	down	0.0002911682304938098	True	70017487	4	True	70014399	1	3084
MITF	chr3	UCEC	69801317	+	0	1	24	184	24	185	0.00	0.01	up	1.0	False	70014400	213083	False	70014399	1	NA
MITF	chr3	UCEC	70014425	+	1	42	23	143	24	185	0.04	0.23	up	0.0327994736837304	False	70014400	25	False	70014399	1	NA
MITF	chr3	UCEC	70014745	+	3	40	21	145	24	185	0.12	0.22	up	0.4230991151571216	False	70014721	24	True	69990394	1	24351
MITF	chr3	UCEC	70014815	+	21	152	3	33	24	185	0.88	0.82	down	0.7738069792714262	False	70014819	4	True	70014399	1	416
MITF	chr3	UCEC	70014975	+	22	86	2	99	24	185	0.92	0.46	down	1.636498594122679e-05	True	70014975	0	True	70014399	1	576
MITF	chr3	UCEC	70015198	+	2	82	22	103	24	185	0.08	0.44	up	0.0006047962718723378	True	70015180	18	True	70014399	1	799
MITF	chr3	UCEC	70015620	+	3	2	21	183	24	185	0.12	0.01	down	0.011512209182862715	False	70015180	440	False	70014399	1	NA
MITF	chr3	UCEC	70016162	+	6	10	18	175	24	185	0.25	0.05	down	0.00449981311964589	True	70015180	982	False	70014399	1	NA
MITF	chr3	UCEC	70016647	+	0	1	24	184	24	185	0.00	0.01	up	1.0	False	70017487	840	False	70014399	1	NA
MITF	chr3	UCEC	70017179	+	1	2	23	183	24	185	0.04	0.01	down	0.30775364985893305	False	70017487	308	False	70014399	1	NA
MITF	chr3	UCEC	70017483	+	24	175	0	10	24	185	1.00	0.95	down	0.6087845708156561	False	70017487	4	True	70014399	1	3084
MYCL	chr1	KICH	40361100	-	10	23	7	24	17	47	0.59	0.49	down	0.5765089874448426	False	40361098	2	True	40363044	1	1944
MYCL	chr1	KICH	40362865	-	5	32	12	15	17	47	0.29	0.68	up	0.009222056525925157	True	40362899	34	False	40363044	1	NA
MYCL	chr1	KICH	40365284	-	7	4	10	43	17	47	0.41	0.09	down	0.005231652474490174	True	40365285	1	True	40366486	1	1202
MYCL	chr1	KICH	40365402	-	1	0	16	47	17	47	0.06	0.00	down	0.2656250000000001	False	40365285	117	False	40366486	1	NA
NF1	chr17	BRCA	29490489	+	0	3	114	1136	114	1139	0.00	0.00	up	1.0	False	29549782	59293	False	29549008	1	NA
NF1	chr17	BRCA	29546380	+	0	4	114	1135	114	1139	0.00	0.00	up	1.0	False	29549782	3402	False	29549008	1	NA
NF1	chr17	BRCA	29549175	+	0	2	114	1137	114	1139	0.00	0.00	up	1.0	False	29549782	607	False	29549008	1	NA
NF1	chr17	BRCA	29549571	+	0	1	114	1138	114	1139	0.00	0.00	up	1.0	False	29549782	211	False	29549008	1	NA
NF1	chr17	BRCA	29549662	+	0	7	114	1132	114	1139	0.00	0.01	up	1.0	False	29549782	120	False	29549008	1	NA
NF1	chr17	BRCA	29549782	+	25	200	89	939	114	1139	0.22	0.18	down	0.2500753843542951	False	29549782	0	True	29549008	1	774
NF1	chr17	BRCA	29553875	+	0	1	114	1138	114	1139	0.00	0.00	up	1.0	False	29549782	4093	False	29549008	1	NA
NF1	chr17	BRCA	29580002	+	2	19	112	1120	114	1139	0.02	0.02	down	1.0	False	29581311	1309	False	29508452	1	NA
NF1	chr17	BRCA	29581295	+	0	1	114	1138	114	1139	0.00	0.00	up	1.0	False	29581311	16	True	29508452	1	72843
NF1	chr17	BRCA	29582917	+	0	1	114	1138	114	1139	0.00	0.00	up	1.0	False	29581311	1606	False	29508452	1	NA
NF1	chr17	BRCA	29588833	+	11	130	103	1009	114	1139	0.10	0.11	up	0.6436930532013064	False	29588813	20	True	29584737	1	4096
NF1	chr17	BRCA	29653296	+	0	1	114	1138	114	1139	0.00	0.00	up	1.0	False	29663892	10596	False	29661862	1	NA
NF1	chr17	BRCA	29663600	+	0	2	114	1137	114	1139	0.00	0.00	up	1.0	False	29663892	292	False	29661862	1	NA
NF1	chr17	BRCA	29663623	+	0	1	114	1138	114	1139	0.00	0.00	up	1.0	False	29663892	269	False	29661862	1	NA
NF1	chr17	BRCA	29663881	+	8	116	106	1023	114	1139	0.07	0.10	up	0.3266966824732519	False	29663892	11	True	29661862	1	2019
NF1	chr17	BRCA	29664730	+	0	3	114	1136	114	1139	0.00	0.00	up	1.0	False	29663892	838	False	29661862	1	NA
NF1	chr17	BRCA	29664788	+	0	1	114	1138	114	1139	0.00	0.00	up	1.0	False	29663892	896	False	29661862	1	NA
NF1	chr17	BRCA	29685665	+	3	68	111	1071	114	1139	0.03	0.06	up	0.1991801185290691	False	29687615	1950	False	29683496	1	NA
NF1	chr17	BRCA	29687607	+	12	135	102	1004	114	1139	0.11	0.12	up	0.7616698372259662	False	29687615	8	True	29683496	1	4111
NF1	chr17	BRCA	29687999	+	60	420	54	719	114	1139	0.53	0.37	down	0.0011861434010820026	True	29687975	24	True	29687729	1	270
NF1	chr17	BRCA	29688245	+	0	1	114	1138	114	1139	0.00	0.00	up	1.0	False	29687975	270	False	29687729	1	NA
NF1	chr17	BRCA	29701308	+	11	140	103	999	114	1139	0.10	0.12	up	0.5452305604098266	False	29701306	2	True	29652837	1	48471
NF1	chr17	BRCA	29701453	+	9	123	105	1016	114	1139	0.08	0.11	up	0.4235699252165073	False	29701452	1	True	29701173	1	280
NF1	chr17	BRCA	29701907	+	0	2	114	1137	114	1139	0.00	0.00	up	1.0	False	29701452	455	False	29701173	1	NA
NF1	chr17	BRCA	29702677	+	0	3	114	1136	114	1139	0.00	0.00	up	1.0	False	29701452	1225	False	29701173	1	NA
NF1	chr17	BRCA	29702757	+	6	62	108	1077	114	1139	0.05	0.05	up	1.0	False	29701452	1305	False	29701173	1	NA
NF1	chr17	BRCA	29702849	+	17	297	97	842	114	1139	0.15	0.26	up	0.008797230501751309	True	29701452	1397	False	29701173	1	NA
NF1	chr17	BRCA	29703353	+	5	37	109	1102	114	1139	0.04	0.03	down	0.5803007680419181	False	29704695	1342	False	29701173	1	NA
NF1	chr17	BRCA	29704693	+	112	1104	2	35	114	1139	0.98	0.97	down	0.5712440756299123	False	29704695	2	True	29701173	1	3520
NF1	chr17	BRCA	29708902	+	48	445	66	694	114	1139	0.42	0.39	down	0.5470743183299625	False	29708905	3	True	29705949	1	2953
NF1	chr17	BRCA	29709134	+	63	534	51	605	114	1139	0.55	0.47	down	0.09483081334911117	False	29709125	9	True	29705949	1	3185
NFE2L2	chr2	BRCA	178083921	-	0	1	114	1131	114	1132	0.00	0.00	up	1.0	False	178092322	8401	False	178092634	1	NA
NFE2L2	chr2	BRCA	178088003	-	0	8	114	1124	114	1132	0.00	0.01	up	1.0	False	178092322	4319	False	178092634	1	NA
NFE2L2	chr2	BRCA	178092115	-	1	12	113	1120	114	1132	0.01	0.01	up	1.0	False	178092322	207	False	178092634	1	NA
NFE2L2	chr2	BRCA	178092302	-	23	375	91	757	114	1132	0.20	0.33	up	0.00432222122225813	True	178092322	20	True	178092634	1	332
NFE2L2	chr2	BRCA	178095036	-	114	1110	0	22	114	1132	1.00	0.98	down	0.25335811321285234	False	178095034	2	True	178095513	1	477
NFE2L2	chr2	BRCA	178095782	-	23	79	91	1053	114	1132	0.20	0.07	down	1.5185063619344074e-05	True	178095034	748	False	178095513	1	NA
NFE2L2	chr2	BRCA	178096498	-	0	4	114	1128	114	1132	0.00	0.00	up	1.0	False	178097005	507	False	178097906	1	NA
NFE2L2	chr2	BRCA	178097020	-	50	573	64	559	114	1132	0.44	0.51	up	0.20129202337620625	False	178097005	15	True	178097906	1	886
NFE2L2	chr2	BRCA	178097569	-	0	1	114	1131	114	1132	0.00	0.00	up	1.0	False	178097005	564	False	178097906	1	NA
NFE2L2	chr2	BRCA	178098653	-	0	1	114	1131	114	1132	0.00	0.00	up	1.0	False	178097005	1648	False	178097906	1	NA
NFE2L2	chr2	BRCA	178148250	-	10	50	104	1082	114	1132	0.09	0.04	down	0.06075169481982042	False	178097005	51245	False	178097906	1	NA
NFE2L2	chr2	BRCA	178175658	-	0	1	114	1131	114	1132	0.00	0.00	up	1.0	False	178097005	78653	False	178097906	1	NA
NFE2L2	chr2	KIRC	178088003	-	2	7	70	527	72	534	0.03	0.01	down	0.29077126004961623	False	178092322	4319	False	178092634	1	NA
NFE2L2	chr2	KIRC	178092115	-	0	47	72	487	72	534	0.00	0.09	up	0.0036990656613117077	True	178092322	207	False	178092634	1	NA
NFE2L2	chr2	KIRC	178092302	-	17	58	55	476	72	534	0.24	0.11	down	0.003946965213002819	True	178092322	20	True	178092634	1	332
NFE2L2	chr2	KIRC	178094864	-	0	2	72	532	72	534	0.00	0.00	up	1.0	False	178095034	170	False	178095513	1	NA
NFE2L2	chr2	KIRC	178095036	-	72	523	0	11	72	534	1.00	0.98	down	0.3775689687540001	False	178095034	2	True	178095513	1	477
NFE2L2	chr2	KIRC	178095782	-	12	34	60	500	72	534	0.17	0.06	down	0.006786514564914423	True	178095034	748	False	178095513	1	NA
NFE2L2	chr2	KIRC	178096498	-	1	3	71	531	72	534	0.01	0.01	down	0.39786708261882203	False	178097005	507	False	178097906	1	NA
NFE2L2	chr2	KIRC	178096827	-	0	2	72	532	72	534	0.00	0.00	up	1.0	False	178097005	178	False	178097906	1	NA
NFE2L2	chr2	KIRC	178097020	-	49	206	23	328	72	534	0.68	0.39	down	3.0710745997940637e-06	True	178097005	15	True	178097906	1	886
NFE2L2	chr2	KIRC	178097854	-	0	1	72	533	72	534	0.00	0.00	up	1.0	False	178097005	849	False	178097906	1	NA
NFE2L2	chr2	KIRC	178148250	-	36	53	36	481	72	534	0.50	0.10	down	9.900428398107495e-15	True	178097005	51245	False	178097906	1	NA
NFE2L2	chr2	KIRC	178175658	-	12	2	60	532	72	534	0.17	0.00	down	2.5045806322337853e-10	True	178097005	78653	False	178097906	1	NA
NFE2L2	chr2	KIRC	178209042	-	0	1	72	533	72	534	0.00	0.00	up	1.0	False	178097005	112037	False	178097906	1	NA
NFE2L2	chr2	THCA	178083921	-	0	2	59	510	59	512	0.00	0.00	up	1.0	False	178092322	8401	False	178092634	1	NA
NFE2L2	chr2	THCA	178088003	-	4	9	55	503	59	512	0.07	0.02	down	0.03613474298240064	False	178092322	4319	False	178092634	1	NA
NFE2L2	chr2	THCA	178092115	-	6	31	53	481	59	512	0.10	0.06	down	0.2571262371677969	False	178092322	207	False	178092634	1	NA
NFE2L2	chr2	THCA	178092302	-	3	69	56	443	59	512	0.05	0.13	up	0.09408643071002172	False	178092322	20	True	178092634	1	332
NFE2L2	chr2	THCA	178094864	-	0	1	59	511	59	512	0.00	0.00	up	1.0	False	178095034	170	False	178095513	1	NA
NFE2L2	chr2	THCA	178095036	-	59	511	0	1	59	512	1.00	1.00	down	1.0	False	178095034	2	True	178095513	1	477
NFE2L2	chr2	THCA	178095782	-	3	23	56	489	59	512	0.05	0.04	down	0.7433862291253274	False	178095034	748	False	178095513	1	NA
NFE2L2	chr2	THCA	178096498	-	1	11	58	501	59	512	0.02	0.02	up	1.0	False	178097005	507	False	178097906	1	NA
NFE2L2	chr2	THCA	178097020	-	16	256	43	256	59	512	0.27	0.50	up	0.0008764395182844365	True	178097005	15	True	178097906	1	886
NFE2L2	chr2	THCA	178097854	-	0	2	59	510	59	512	0.00	0.00	up	1.0	False	178097005	849	False	178097906	1	NA
NFE2L2	chr2	THCA	178098653	-	1	0	58	512	59	512	0.02	0.00	down	0.10332749562173482	False	178097005	1648	False	178097906	1	NA
NFE2L2	chr2	THCA	178148250	-	13	50	46	462	59	512	0.22	0.10	down	0.007990288326775615	True	178097005	51245	False	178097906	1	NA
NFE2L2	chr2	THCA	178175658	-	0	2	59	510	59	512	0.00	0.00	up	1.0	False	178097005	78653	False	178097906	1	NA
NFE2L2	chr2	THCA	178180973	-	1	0	58	512	59	512	0.02	0.00	down	0.10332749562173482	False	178097005	83968	False	178097906	1	NA
NFE2L3	chr7	KIRC	26223505	+	30	228	24	143	54	371	0.56	0.61	up	0.4565797694739348	False	26223495	10	True	26223452	1	53
NFE2L3	chr7	KIRC	26225104	+	0	4	54	367	54	371	0.00	0.01	up	1.0	False	26223495	1609	False	26223452	1	NA
NFE2L3	chr7	KIRC	26225930	+	4	92	50	279	54	371	0.07	0.25	up	0.002843710521190485	True	26226745	815	False	26225403	1	NA
NFE2L3	chr7	KIRC	26226431	+	0	1	54	370	54	371	0.00	0.00	up	1.0	False	26226745	314	False	26225403	1	NA
NFE2L3	chr7	KIRC	26226745	+	43	201	11	170	54	371	0.80	0.54	down	0.0003544189221563388	True	26226745	0	True	26225403	1	1342
NFE2L3	chr7	KIRC	26226999	+	0	2	54	369	54	371	0.00	0.01	up	1.0	False	26226745	254	False	26225403	1	NA
PTCH1	chr9	BRCA	98205278	-	37	220	60	837	97	1057	0.38	0.21	down	0.00019323630253035816	True	98205266	12	True	98209194	1	3916
PTCH1	chr9	BRCA	98205693	-	63	475	34	582	97	1057	0.65	0.45	down	0.00017779406482948707	True	98205693	0	True	98209194, 98236330	2	NA
PTCH1	chr9	BRCA	98206117	-	1	3	96	1054	97	1057	0.01	0.00	down	0.29649197283620665	False	98206444	327	False	98209194	1	NA
PTCH1	chr9	BRCA	98206430	-	56	413	41	644	97	1057	0.58	0.39	down	0.000494503388935317	True	98206444	14	True	98209194	1	2764
PTCH1	chr9	BRCA	98208439	-	11	505	86	552	97	1057	0.11	0.48	up	2.3143392556679376e-13	True	98208441	2	True	98209194	1	755
PTCH1	chr9	BRCA	98242800	-	8	396	89	661	97	1057	0.08	0.37	up	2.9838318305740886e-10	True	98242821	21	True	98244319	1	1519
PTCH1	chr9	BRCA	98244110	-	9	44	88	1013	97	1057	0.09	0.04	down	0.03666834480057125	False	98244111	1	True	98244227	1	117
PTCH1	chr9	BRCA	98244231	-	13	479	84	578	97	1057	0.13	0.45	up	1.4797465519803222e-10	True	98244252	21	True	98248142	1	3911
PTCH1	chr9	BRCA	98248136	-	0	1	97	1056	97	1057	0.00	0.00	up	1.0	False	98244252	3884	False	98248142	1	NA
PTCH1	chr9	BRCA	98269924	-	0	7	97	1050	97	1057	0.00	0.01	up	1.0	False	98244252	25672	False	98248142	1	NA
RB1	chr13	BRCA	48881489	+	0	1	102	927	102	928	0.00	0.00	up	1.0	False	48937044	55555	False	48934177	1	NA
RB1	chr13	BRCA	48882502	+	0	1	102	927	102	928	0.00	0.00	up	1.0	False	48937044	54542	False	48934177	1	NA
RB1	chr13	BRCA	48937028	+	8	116	94	812	102	928	0.08	0.12	up	0.20064831244855194	False	48937044	16	True	48934177	1	2851
RB1	chr13	BRCA	48939154	+	0	1	102	927	102	928	0.00	0.00	up	1.0	False	48937044	2110	False	48934177	1	NA
RB1	chr13	BRCA	48954420	+	7	26	95	902	102	928	0.07	0.03	down	0.03726402920738143	False	48937044	17376	False	48934177	1	NA
RB1	chr13	BRCA	49039355	+	0	1	102	927	102	928	0.00	0.00	up	1.0	False	49056122	16767	False	49054207	1	NA
RB1	chr13	BRCA	49039596	+	0	1	102	927	102	928	0.00	0.00	up	1.0	False	49056122	16526	False	49054207	1	NA
RB1	chr13	BRCA	49050883	+	0	1	102	927	102	928	0.00	0.00	up	1.0	False	49056122	5239	False	49054207	1	NA
RB1	chr13	BRCA	49054853	+	0	4	102	924	102	928	0.00	0.00	up	1.0	False	49056122	1269	False	49054207	1	NA
RB1	chr13	BRCA	49055463	+	0	5	102	923	102	928	0.00	0.01	up	1.0	False	49056122	659	False	49054207	1	NA
RB1	chr13	BRCA	49056026	+	63	724	39	204	102	928	0.62	0.78	up	0.0005092653106332935	True	49056122	96	False	49054207	1	NA
RB1	chr13	BRCA	49056142	+	69	495	33	433	102	928	0.68	0.53	down	0.006308907565929426	True	49056122	20	True	49054207	1	1935
RNF43	chr17	KIRC	56429878	-	43	209	18	158	61	367	0.70	0.57	down	0.049892070982745125	False	56429861	17	True	56432304	1	2426
RNF43	chr17	KIRC	56431037	-	37	87	24	280	61	367	0.61	0.24	down	2.5626488535887515e-08	True	56431037	0	True	56432304	1	1267
RNF43	chr17	KIRC	56432284	-	3	147	58	220	61	367	0.05	0.40	up	4.386787551508717e-09	True	56432288	4	True	56432304	1	20
RNF43	chr17	KIRC	56434325	-	21	56	40	311	61	367	0.34	0.15	down	0.0009120941857550383	True	56434344	19	True	56434527	1	202
RNF43	chr17	UCEC	56429878	-	4	54	13	115	17	169	0.24	0.32	up	0.5896664239097575	False	56429861	17	True	56432304	1	2426
RNF43	chr17	UCEC	56431037	-	8	144	9	25	17	169	0.47	0.85	up	0.0007020992519891271	True	56431037	0	True	56432304	1	1267
RNF43	chr17	UCEC	56432284	-	7	19	10	150	17	169	0.41	0.11	down	0.0034885745930362594	True	56432288	4	True	56432304	1	20
RNF43	chr17	UCEC	56434325	-	6	61	11	108	17	169	0.35	0.36	up	1.0	False	56434344	19	True	56434527	1	202
SOX2	chr3	BRCA	181431123	+	25	190	4	234	29	424	0.86	0.45	down	1.0995748046151144e-05	True	181431103	20	True	181431102	1	21
SOX2	chr3	BRCA	181432224	+	7	282	22	142	29	424	0.24	0.67	up	9.48653693852054e-06	True	181432221	3	True	181431102	1	1122
SUFU	chr10	BRCA	104284625	+	1	16	91	920	92	936	0.01	0.02	up	1.0	False	104378416	93791	False	104377335	1	NA
SUFU	chr10	BRCA	104378418	+	41	311	51	625	92	936	0.45	0.33	down	0.03764827786083297	False	104378416	2	True	104377335	1	1083
SUFU	chr10	BRCA	104379220	+	59	460	33	476	92	936	0.64	0.49	down	0.006289177257622845	True	104379219	1	True	104378828	1	392
SUFU	chr10	BRCA	104390024	+	0	5	92	931	92	936	0.00	0.01	up	1.0	False	104393292	3268	False	104389912	1	NA
SUFU	chr10	BRCA	104393211	+	46	666	46	270	92	936	0.50	0.71	up	7.406492505659579e-05	True	104393292	81	False	104389912	1	NA
SUFU	chr10	BRCA	104393267	+	1	21	91	915	92	936	0.01	0.02	up	0.7131796356038105	False	104393292	25	False	104389912	1	NA
WT1	chr11	BRCA	32409321	-	8	398	27	416	35	814	0.23	0.49	up	0.002867901945850561	True	32409321	0	True	32410604, 32439119	2	NA
WT1	chr11	BRCA	32410121	-	0	2	35	812	35	814	0.00	0.00	up	1.0	False	32410225	104	False	32410604	1	NA
WT1	chr11	BRCA	32410207	-	19	376	16	438	35	814	0.54	0.46	down	0.3890947577320154	False	32410225	18	True	32410604	1	397
WT1	chr11	BRCA	32410611	-	25	363	10	451	35	814	0.71	0.45	down	0.0027065154188205607	True	32410587	24	True	32410604	1	7
WT1	chr11	BRCA	32449321	-	0	1	35	813	35	814	0.00	0.00	up	1.0	False	32410587	38734	False	32410604	1	NA
WT1	chr11	KICH	32409321	-	22	1	1	7	23	8	0.96	0.12	down	2.3451191415596287e-05	True	32409321	0	True	32410604, 32439119	2	NA
WT1	chr11	KICH	32410121	-	1	0	22	8	23	8	0.04	0.00	down	1.0	False	32410225	104	False	32410604	1	NA
WT1	chr11	KICH	32410207	-	2	5	21	3	23	8	0.09	0.62	up	0.0056358917315536	True	32410225	18	True	32410604	1	397
WT1	chr11	KICH	32410611	-	2	4	21	4	23	8	0.09	0.50	up	0.025840677676050288	False	32410587	24	True	32410604	1	7
WT1	chr11	KIRC	32409321	-	51	202	11	150	62	352	0.82	0.57	down	0.00019603056843039456	True	32409321	0	True	32410604, 32439119	2	NA
WT1	chr11	KIRC	32410207	-	14	108	48	244	62	352	0.23	0.31	up	0.2282595602538912	False	32410225	18	True	32410604	1	397
WT1	chr11	KIRC	32410611	-	12	139	50	213	62	352	0.19	0.39	up	0.002459668518661487	True	32410587	24	True	32410604	1	7
WT1	chr11	KIRP	32409321	-	26	64	5	78	31	142	0.84	0.45	down	0.00010677353811632728	True	32409321	0	True	32410604, 32439119	2	NA
WT1	chr11	KIRP	32410207	-	5	69	26	73	31	142	0.16	0.49	up	0.0010948690321311016	True	32410225	18	True	32410604	1	397
WT1	chr11	KIRP	32410611	-	6	73	25	69	31	142	0.19	0.51	up	0.0012676489441065773	True	32410587	24	True	32410604	1	7

## Sheet: Table S5
Table S5. Mapping relations between diseases in TCGA and those in COSMIC.
TCGA Cancer type	COSMIC Primary site	COSMIC Site subtype 1	COSMIC Site subtype 2	COSMIC Site subtype 3	COSMIC Primary histology	COSMIC Histology subtype 1	COSMIC Histology subtype 2	COSMIC Histology subtype 3
ACC	adrenal_gland	adrenal_gland	NS	NS	adrenal_cortical_carcinoma	aldosterone_and_cortisol-producing	NS	NS
ACC	adrenal_gland	adrenal_gland	NS	NS	adrenal_cortical_carcinoma	aldosterone_producing	NS	NS
ACC	adrenal_gland	adrenal_gland	NS	NS	adrenal_cortical_carcinoma	cortisol_and_DHEA_producing	NS	NS
ACC	adrenal_gland	adrenal_gland	NS	NS	adrenal_cortical_carcinoma	cortisol_and_virilizing_syndrome-producing	NS	NS
ACC	adrenal_gland	adrenal_gland	NS	NS	adrenal_cortical_carcinoma	cortisol_producing	NS	NS
ACC	adrenal_gland	adrenal_gland	NS	NS	adrenal_cortical_carcinoma	functioning	NS	NS
ACC	adrenal_gland	adrenal_gland	NS	NS	adrenal_cortical_carcinoma	multihormonal	NS	NS
ACC	adrenal_gland	adrenal_gland	NS	NS	adrenal_cortical_carcinoma	non_functioning	NS	NS
ACC	adrenal_gland	adrenal_gland	NS	NS	adrenal_cortical_carcinoma	NS	NS	NS
ACC	adrenal_gland	adrenal_gland	NS	NS	adrenal_cortical_carcinoma	virilizing_syndrome_producing	NS	NS
BLCA	urinary_tract	bladder	NS	NS	carcinoma	transitional_cell_carcinoma	micropapillary_transitional_cell_carcinoma	NS
BLCA	urinary_tract	bladder	NS	NS	carcinoma	transitional_cell_carcinoma	nested_variant	NS
BLCA	urinary_tract	bladder	NS	NS	carcinoma	transitional_cell_carcinoma	nonpapillary_transitional_cell_carcinoma_in_situ	NS
BLCA	urinary_tract	bladder	NS	NS	carcinoma	transitional_cell_carcinoma	NS	NS
BLCA	urinary_tract	bladder	NS	NS	carcinoma	transitional_cell_carcinoma	papillary_transitional_cell_carcinoma_non_invasive	NS
BLCA	urinary_tract	bladder	NS	NS	carcinoma	transitional_cell_carcinoma	papillary_transitional_cell_carcinoma	NS
BRCA	breast	NS	NS	NS	carcinoma	basal_(triple-negative)_carcinoma	NS	NS
BRCA	breast	NS	NS	NS	carcinoma	ductal_carcinoma	apocrine	NS
BRCA	breast	NS	NS	NS	carcinoma	ductal_carcinoma	medullary	NS
BRCA	breast	NS	NS	NS	carcinoma	ductal_carcinoma	metaplastic_sarcomatoid	NS
BRCA	breast	NS	NS	NS	carcinoma	ductal_carcinoma	micropapillary	NS
BRCA	breast	NS	NS	NS	carcinoma	ductal_carcinoma	mucinous	NS
BRCA	breast	NS	NS	NS	carcinoma	ductal_carcinoma	NS	NS
BRCA	breast	NS	NS	NS	carcinoma	ductal_carcinoma	papillary	NS
BRCA	breast	NS	NS	NS	carcinoma	ductal_carcinoma	secretory	NS
BRCA	breast	NS	NS	NS	carcinoma	ductal_carcinoma	squamous_cell_carcinoma	NS
BRCA	breast	NS	NS	NS	carcinoma	ductal_carcinoma	tubular	NS
BRCA	breast	NS	NS	NS	carcinoma	ductolobular_carcinoma	NS	NS
BRCA	breast	NS	NS	NS	carcinoma	ER-HER-positive_carcinoma	NS	NS
BRCA	breast	NS	NS	NS	carcinoma	ER-positive_carcinoma	NS	NS
BRCA	breast	NS	NS	NS	carcinoma	ER-PR-HER-positive_carcinoma	NS	NS
BRCA	breast	NS	NS	NS	carcinoma	ER-PR-positive_carcinoma	NS	NS
BRCA	breast	NS	NS	NS	carcinoma	HER-positive_carcinoma	NS	NS
BRCA	breast	NS	NS	NS	carcinoma	lobular_carcinoma	NS	NS
BRCA	breast	NS	NS	NS	carcinoma	lobular_carcinoma	pleomorphic	NS
BRCA	breast	NS	NS	NS	carcinoma	lobular_carcinoma	tubulo-lobular	NS
BRCA	breast	NS	NS	NS	carcinoma	luminal_A_carcinoma	NS	NS
BRCA	breast	NS	NS	NS	carcinoma	luminal_B_carcinoma	NS	NS
BRCA	breast	NS	NS	NS	carcinoma	PR-HER-positive_carcinoma	NS	NS
BRCA	breast	NS	NS	NS	carcinoma	PR-positive_carcinoma	NS	NS
CESC	cervix	NS	NS	NS	carcinoma	endocervical_adenocarcinoma	NS	NS
CESC	cervix	NS	NS	NS	carcinoma	mixed_adenosquamous_carcinoma	NS	NS
CESC	cervix	NS	NS	NS	carcinoma	squamous_cell_carcinoma	NS	NS
CHOL	biliary_tract	bile_duct	NS	NS	carcinoma	adenocarcinoma	Klatskin_tumour	NS
CHOL	biliary_tract	bile_duct	NS	NS	carcinoma	adenocarcinoma	NS	NS
CHOL	biliary_tract	bile_duct	NS	NS	carcinoma	adenosquamous_carcinoma	NS	NS
CHOL	biliary_tract	bile_duct	NS	NS	carcinoma	lymphoepithelioma_like_carcinoma	NS	NS
CHOL	biliary_tract	bile_duct	NS	NS	carcinoma	NS	NS	NS
CHOL	biliary_tract	bile_duct	NS	NS	carcinoma	squamous_cell_carcinoma	NS	NS
CHOL	biliary_tract	bile_duct	NS	NS	carcinoma	undifferentiated_carcinoma	NS	NS
CHOL	biliary_tract	bile_duct	NS	NS	other	intraepithelial_neoplasia	non_invasive-carcinoma_in_situ	NS
COAD	large_intestine	colon	ascending	NS	carcinoma	adenocarcinoma	NS	NS
COAD	large_intestine	colon	ascending-transverse	NS	carcinoma	adenocarcinoma	NS	NS
COAD	large_intestine	colon	descending	NS	carcinoma	adenocarcinoma	NS	NS
COAD	large_intestine	colon	left	NS	carcinoma	adenocarcinoma	NS	NS
COAD	large_intestine	colon	NS	NS	carcinoma	adenocarcinoma	NS	NS
COAD	large_intestine	colon	right	NS	carcinoma	adenocarcinoma	NS	NS
COAD	large_intestine	colon	right	NS	carcinoma	adenocarcinoma	rhabdoid	NS
COAD	large_intestine	colon	sigmoid	NS	carcinoma	adenocarcinoma	NS	NS
COAD	large_intestine	colon	transverse	NS	carcinoma	adenocarcinoma	NS	NS
DLBC	haematopoietic_and_lymphoid_tissue	abdomen	NS	NS	lymphoid_neoplasm	diffuse_large_B_cell_lymphoma	NS	NS
DLBC	haematopoietic_and_lymphoid_tissue	adrenal_gland	NS	NS	lymphoid_neoplasm	diffuse_large_B_cell_lymphoma	NS	NS
DLBC	haematopoietic_and_lymphoid_tissue	bladder	NS	NS	lymphoid_neoplasm	diffuse_large_B_cell_lymphoma	NS	NS
DLBC	haematopoietic_and_lymphoid_tissue	blood_vessel	NS	NS	lymphoid_neoplasm	diffuse_large_B_cell_lymphoma	NS	NS
DLBC	haematopoietic_and_lymphoid_tissue	bone	NS	NS	lymphoid_neoplasm	diffuse_large_B_cell_lymphoma	NS	NS
DLBC	haematopoietic_and_lymphoid_tissue	breast	NS	NS	lymphoid_neoplasm	diffuse_large_B_cell_lymphoma	NS	NS
DLBC	haematopoietic_and_lymphoid_tissue	central_nervous_system	NS	NS	lymphoid_neoplasm	diffuse_large_B_cell_lymphoma	NS	NS
DLBC	haematopoietic_and_lymphoid_tissue	central_nervous_system	NS	NS	lymphoid_neoplasm	primary_central_nervous_system_lymphoma	diffuse_large_B_cell_lymphoma	NS
DLBC	haematopoietic_and_lymphoid_tissue	extranodal	NS	NS	lymphoid_neoplasm	diffuse_large_B_cell_lymphoma	NS	NS
DLBC	haematopoietic_and_lymphoid_tissue	gastrointestinal_tract_(site_indeterminate)	NS	NS	lymphoid_neoplasm	diffuse_large_B_cell_lymphoma	NS	NS
DLBC	haematopoietic_and_lymphoid_tissue	groin	NS	NS	lymphoid_neoplasm	diffuse_large_B_cell_lymphoma	NS	NS
DLBC	haematopoietic_and_lymphoid_tissue	intraabdominal	NS	NS	lymphoid_neoplasm	diffuse_large_B_cell_lymphoma	NS	NS
DLBC	haematopoietic_and_lymphoid_tissue	kidney	NS	NS	lymphoid_neoplasm	diffuse_large_B_cell_lymphoma	NS	NS
DLBC	haematopoietic_and_lymphoid_tissue	large_intestine	NS	NS	lymphoid_neoplasm	diffuse_large_B_cell_lymphoma	NS	NS
DLBC	haematopoietic_and_lymphoid_tissue	larynx	NS	NS	lymphoid_neoplasm	diffuse_large_B_cell_lymphoma	NS	NS
DLBC	haematopoietic_and_lymphoid_tissue	leg	NS	NS	lymphoid_neoplasm	diffuse_large_B_cell_lymphoma	NS	NS
DLBC	haematopoietic_and_lymphoid_tissue	liver	NS	NS	lymphoid_neoplasm	diffuse_large_B_cell_lymphoma	NS	NS
DLBC	haematopoietic_and_lymphoid_tissue	lower_leg	NS	NS	lymphoid_neoplasm	diffuse_large_B_cell_lymphoma	NS	NS
DLBC	haematopoietic_and_lymphoid_tissue	lung	NS	NS	lymphoid_neoplasm	diffuse_large_B_cell_lymphoma	NS	NS
DLBC	haematopoietic_and_lymphoid_tissue	lymph_node	NS	NS	lymphoid_neoplasm	diffuse_large_B_cell_lymphoma	NS	NS
DLBC	haematopoietic_and_lymphoid_tissue	mediastinum	NS	NS	lymphoid_neoplasm	diffuse_large_B_cell_lymphoma	primary_mediastinal_B_cell_lymphoma	NS
DLBC	haematopoietic_and_lymphoid_tissue	mouth	NS	NS	lymphoid_neoplasm	diffuse_large_B_cell_lymphoma	NS	NS
DLBC	haematopoietic_and_lymphoid_tissue	muscle	NS	NS	lymphoid_neoplasm	diffuse_large_B_cell_lymphoma	NS	NS
DLBC	haematopoietic_and_lymphoid_tissue	NS	NS	NS	lymphoid_neoplasm	AIDS_related_lymphoma	diffuse_large_B_cell_lymphoma	NS
DLBC	haematopoietic_and_lymphoid_tissue	NS	NS	NS	lymphoid_neoplasm	diffuse_large_B_cell_lymphoma	NS	NS
DLBC	haematopoietic_and_lymphoid_tissue	NS	NS	NS	lymphoid_neoplasm	immunodeficiency_related_lymphoma	diffuse_large_B_cell_lymphoma	NS
DLBC	haematopoietic_and_lymphoid_tissue	NS	NS	NS	lymphoid_neoplasm	post_transplant_lymphoproliferative_disorder	diffuse_large_B_cell_lymphoma	NS
DLBC	haematopoietic_and_lymphoid_tissue	orbit	NS	NS	lymphoid_neoplasm	diffuse_large_B_cell_lymphoma	NS	NS
DLBC	haematopoietic_and_lymphoid_tissue	pharynx	NS	NS	lymphoid_neoplasm	diffuse_large_B_cell_lymphoma	NS	NS
DLBC	haematopoietic_and_lymphoid_tissue	pleura	NS	NS	lymphoid_neoplasm	diffuse_large_B_cell_lymphoma	NS	NS
DLBC	haematopoietic_and_lymphoid_tissue	retroperitoneum	NS	NS	lymphoid_neoplasm	diffuse_large_B_cell_lymphoma	NS	NS
DLBC	haematopoietic_and_lymphoid_tissue	salivary_gland	NS	NS	lymphoid_neoplasm	diffuse_large_B_cell_lymphoma	NS	NS
DLBC	haematopoietic_and_lymphoid_tissue	sinonasal_and_nasal_cavity	NS	NS	lymphoid_neoplasm	diffuse_large_B_cell_lymphoma	NS	NS
DLBC	haematopoietic_and_lymphoid_tissue	skin	NS	NS	lymphoid_neoplasm	diffuse_large_B_cell_lymphoma	NS	NS
DLBC	haematopoietic_and_lymphoid_tissue	skin	NS	NS	lymphoid_neoplasm	primary_cutaneous_diffuse_large_B_cell_lymphoma_leg_type	NS	NS
DLBC	haematopoietic_and_lymphoid_tissue	small_intestine	NS	NS	lymphoid_neoplasm	diffuse_large_B_cell_lymphoma	NS	NS
DLBC	haematopoietic_and_lymphoid_tissue	soft_tissue	NS	NS	lymphoid_neoplasm	diffuse_large_B_cell_lymphoma	NS	NS
DLBC	haematopoietic_and_lymphoid_tissue	spine	NS	NS	lymphoid_neoplasm	diffuse_large_B_cell_lymphoma	NS	NS
DLBC	haematopoietic_and_lymphoid_tissue	spleen	NS	NS	lymphoid_neoplasm	diffuse_large_B_cell_lymphoma	NS	NS
DLBC	haematopoietic_and_lymphoid_tissue	stomach	NS	NS	lymphoid_neoplasm	diffuse_large_B_cell_lymphoma	NS	NS
DLBC	haematopoietic_and_lymphoid_tissue	testis	NS	NS	lymphoid_neoplasm	diffuse_large_B_cell_lymphoma	NS	NS
DLBC	haematopoietic_and_lymphoid_tissue	thyroid	NS	NS	lymphoid_neoplasm	diffuse_large_B_cell_lymphoma	NS	NS
DLBC	haematopoietic_and_lymphoid_tissue	tongue	NS	NS	lymphoid_neoplasm	diffuse_large_B_cell_lymphoma	NS	NS
DLBC	haematopoietic_and_lymphoid_tissue	tonsil	NS	NS	lymphoid_neoplasm	diffuse_large_B_cell_lymphoma	NS	NS
ESCA	oesophagus	lower_third	NS	NS	carcinoma	adenocarcinoma	NS	NS
ESCA	oesophagus	lower_third	NS	NS	carcinoma	lymphoepithelioma_like_carcinoma	NS	NS
ESCA	oesophagus	lower_third	NS	NS	carcinoma	squamous_cell_carcinoma	NS	NS
ESCA	oesophagus	middle_third	NS	NS	carcinoma	mixed_carcinoma	NS	NS
ESCA	oesophagus	middle_third	NS	NS	carcinoma	small_cell_carcinoma	NS	NS
ESCA	oesophagus	middle_third	NS	NS	carcinoma	squamous_cell_carcinoma	NS	NS
ESCA	oesophagus	NS	NS	NS	carcinoma	adenocarcinoma	NS	NS
ESCA	oesophagus	NS	NS	NS	carcinoma	carcinosarcoma	NS	NS
ESCA	oesophagus	NS	NS	NS	carcinoma	mixed_carcinoma	NS	NS
ESCA	oesophagus	NS	NS	NS	carcinoma	NS	NS	NS
ESCA	oesophagus	NS	NS	NS	carcinoma	small_cell_carcinoma	NS	NS
ESCA	oesophagus	NS	NS	NS	carcinoma	squamous_cell_carcinoma	NS	NS
ESCA	oesophagus	NS	NS	NS	other	dysplasia	high_grade-carcinoma_in_situ	NS
ESCA	oesophagus	upper_third	NS	NS	carcinoma	squamous_cell_carcinoma	NS	NS
GBM	central_nervous_system	basal_ganglia	NS	NS	glioma	astrocytoma_Grade_IV	glioblastoma_multiforme	NS
GBM	central_nervous_system	brain	NS	NS	glioma	astrocytoma_Grade_IV	glioblastoma_multiforme	NS
GBM	central_nervous_system	brainstem	NS	NS	glioma	astrocytoma_Grade_IV	glioblastoma_multiforme	NS
GBM	central_nervous_system	cerebellum	NS	NS	glioma	astrocytoma_Grade_IV	glioblastoma_multiforme	NS
GBM	central_nervous_system	cerebral_cortex	NS	NS	glioma	astrocytoma_Grade_IV	glioblastoma_multiforme	NS
GBM	central_nervous_system	cerebral_hemisphere	NS	NS	glioma	astrocytoma_Grade_IV	glioblastoma_multiforme	NS
GBM	central_nervous_system	cerebrum	NS	NS	glioma	astrocytoma_Grade_IV	glioblastoma_multiforme	NS
GBM	central_nervous_system	chiasm	NS	NS	glioma	astrocytoma_Grade_IV	glioblastoma_multiforme	NS
GBM	central_nervous_system	cingulate_gyrus	NS	NS	glioma	astrocytoma_Grade_IV	glioblastoma_multiforme	NS
GBM	central_nervous_system	corpus_callosum	NS	NS	glioma	astrocytoma_Grade_IV	glioblastoma_multiforme	NS
GBM	central_nervous_system	frontal_lobe	NS	NS	glioma	astrocytoma_Grade_IV	glioblastoma_multiforme	NS
GBM	central_nervous_system	frontobasal	NS	NS	glioma	astrocytoma_Grade_IV	glioblastoma_multiforme	NS
GBM	central_nervous_system	frontoparietal	NS	NS	glioma	astrocytoma_Grade_IV	glioblastoma_multiforme	NS
GBM	central_nervous_system	frontotemporal	NS	NS	glioma	astrocytoma_Grade_IV	glioblastoma_multiforme	NS
GBM	central_nervous_system	hypothalamus	NS	NS	glioma	astrocytoma_Grade_IV	glioblastoma_multiforme	NS
GBM	central_nervous_system	intraventricular	NS	NS	glioma	astrocytoma_Grade_IV	glioblastoma_multiforme	NS
GBM	central_nervous_system	lateral_ventricle	NS	NS	glioma	astrocytoma_Grade_IV	glioblastoma_multiforme	NS
GBM	central_nervous_system	NS	NS	NS	glioma	astrocytoma_Grade_IV	glioblastoma_multiforme	NS
GBM	central_nervous_system	occipital_lobe	NS	NS	glioma	astrocytoma_Grade_IV	glioblastoma_multiforme	NS
GBM	central_nervous_system	parietal_lobe	NS	NS	glioma	astrocytoma_Grade_IV	glioblastoma_multiforme	NS
GBM	central_nervous_system	parietooccipital	NS	NS	glioma	astrocytoma_Grade_IV	glioblastoma_multiforme	NS
GBM	central_nervous_system	posterior_fossa	NS	NS	glioma	astrocytoma_Grade_IV	glioblastoma_multiforme	NS
GBM	central_nervous_system	spinal_cord	NS	NS	glioma	astrocytoma_Grade_IV	glioblastoma_multiforme	NS
GBM	central_nervous_system	supratentorial	NS	NS	glioma	astrocytoma_Grade_IV	glioblastoma_multiforme	NS
GBM	central_nervous_system	temporal_lobe	NS	NS	glioma	astrocytoma_Grade_IV	glioblastoma_multiforme	NS
GBM	central_nervous_system	temporooccipital	NS	NS	glioma	astrocytoma_Grade_IV	glioblastoma_multiforme	NS
GBM	central_nervous_system	temporoparietal	NS	NS	glioma	astrocytoma_Grade_IV	glioblastoma_multiforme	NS
GBM	central_nervous_system	thalamus	NS	NS	glioma	astrocytoma_Grade_IV	glioblastoma_multiforme	NS
GBM	central_nervous_system	third_ventricle	NS	NS	glioma	astrocytoma_Grade_IV	glioblastoma_multiforme	NS
HNSC	skin	head_neck	NS	NS	carcinoma	squamous_cell_carcinoma	NS	NS
HNSC	upper_aerodigestive_tract	head_neck	NS	NS	carcinoma	squamous_cell_carcinoma	NS	NS
HNSC	upper_aerodigestive_tract	head_neck	NS	NS	carcinoma	squamous_cell_carcinoma	spindle	NS
KICH	kidney	NS	NS	NS	carcinoma	chromophobe_renal_cell_carcinoma	classic	NS
KICH	kidney	NS	NS	NS	carcinoma	chromophobe_renal_cell_carcinoma	eosinophilic	NS
KICH	kidney	NS	NS	NS	carcinoma	chromophobe_renal_cell_carcinoma	NS	NS
KICH	kidney	NS	NS	NS	other	mixed_oncocytoma_and_chromophobe_renal_cell-carcinoma	NS	NS
KICH	kidney	NS	NS	NS	renal_cell_carcinoma	chromophobe_cell	NS	NS
KICH	kidney	NS	NS	NS	renal_cell_carcinoma	chromophobe	NS	NS
KIRC	kidney	NS	NS	NS	carcinoma	clear_cell_papillary_renal_cell_carcinoma	NS	NS
KIRC	kidney	NS	NS	NS	carcinoma	clear_cell_renal_cell_carcinoma	NS	NS
KIRC	kidney	NS	NS	NS	renal_cell_carcinoma	alveolar_clear_cell	NS	NS
KIRC	kidney	NS	NS	NS	renal_cell_carcinoma	conventional_(clear_cell)	NS	NS
KIRC	kidney	NS	NS	NS	renal_cell_carcinoma	cystic_clear_cell	NS	NS
KIRP	kidney	NS	NS	NS	carcinoma	clear_cell_papillary_renal_cell_carcinoma	NS	NS
KIRP	kidney	NS	NS	NS	carcinoma	papillary_renal_cell_carcinoma	NS	NS
KIRP	kidney	NS	NS	NS	carcinoma	papillary_renal_cell_carcinoma	oncocytic	NS
KIRP	kidney	NS	NS	NS	carcinoma	papillary_renal_cell_carcinoma	Type_1	NS
KIRP	kidney	NS	NS	NS	carcinoma	papillary_renal_cell_carcinoma	Type_2	NS
KIRP	kidney	NS	NS	NS	carcinoma	renal_cell	papillary_cell	NS
LAML	haematopoietic_and_lymphoid_tissue	NS	NS	NS	haematopoietic_neoplasm	acute_myeloid_leukaemia	acute_panmyelosis_with_fibrosis	NS
LAML	haematopoietic_and_lymphoid_tissue	NS	NS	NS	haematopoietic_neoplasm	acute_myeloid_leukaemia_associated_with_mastocytosis	NS	NS
LAML	haematopoietic_and_lymphoid_tissue	NS	NS	NS	haematopoietic_neoplasm	acute_myeloid_leukaemia_associated_with_MDS	bone_marrow_disorder	aplastic_anaemia
LAML	haematopoietic_and_lymphoid_tissue	NS	NS	NS	haematopoietic_neoplasm	acute_myeloid_leukaemia_associated_with_MDS	core-binding_factor	NS
LAML	haematopoietic_and_lymphoid_tissue	NS	NS	NS	haematopoietic_neoplasm	acute_myeloid_leukaemia_associated_with_MDS	inherited_bone_marrow_disorder	congenital_neutropenia
LAML	haematopoietic_and_lymphoid_tissue	NS	NS	NS	haematopoietic_neoplasm	acute_myeloid_leukaemia_associated_with_MDS	M0	NS
LAML	haematopoietic_and_lymphoid_tissue	NS	NS	NS	haematopoietic_neoplasm	acute_myeloid_leukaemia_associated_with_MDS	M1	NS
LAML	haematopoietic_and_lymphoid_tissue	NS	NS	NS	haematopoietic_neoplasm	acute_myeloid_leukaemia_associated_with_MDS	M2	NS
LAML	haematopoietic_and_lymphoid_tissue	NS	NS	NS	haematopoietic_neoplasm	acute_myeloid_leukaemia_associated_with_MDS	M4_5	NS
LAML	haematopoietic_and_lymphoid_tissue	NS	NS	NS	haematopoietic_neoplasm	acute_myeloid_leukaemia_associated_with_MDS	M4	NS
LAML	haematopoietic_and_lymphoid_tissue	NS	NS	NS	haematopoietic_neoplasm	acute_myeloid_leukaemia_associated_with_MDS	M5	NS
LAML	haematopoietic_and_lymphoid_tissue	NS	NS	NS	haematopoietic_neoplasm	acute_myeloid_leukaemia_associated_with_MDS	M6	NS
LAML	haematopoietic_and_lymphoid_tissue	NS	NS	NS	haematopoietic_neoplasm	acute_myeloid_leukaemia_associated_with_MDS	M7	NS
LAML	haematopoietic_and_lymphoid_tissue	NS	NS	NS	haematopoietic_neoplasm	acute_myeloid_leukaemia_associated_with_MDS	NS	NS
LAML	haematopoietic_and_lymphoid_tissue	NS	NS	NS	haematopoietic_neoplasm	acute_myeloid_leukaemia	bone_marrow_disorder	chronic_idiopathic_neutropenia
LAML	haematopoietic_and_lymphoid_tissue	NS	NS	NS	haematopoietic_neoplasm	acute_myeloid_leukaemia	core-binding_factor	inv(16)
LAML	haematopoietic_and_lymphoid_tissue	NS	NS	NS	haematopoietic_neoplasm	acute_myeloid_leukaemia	core-binding_factor	NS
LAML	haematopoietic_and_lymphoid_tissue	NS	NS	NS	haematopoietic_neoplasm	acute_myeloid_leukaemia	core-binding_factor	t(8;21)
LAML	haematopoietic_and_lymphoid_tissue	NS	NS	NS	haematopoietic_neoplasm	acute_myeloid_leukaemia	inherited_bone_marrow_disorder	congenital_neutropenia
LAML	haematopoietic_and_lymphoid_tissue	NS	NS	NS	haematopoietic_neoplasm	acute_myeloid_leukaemia	inherited_bone_marrow_disorder	cyclic_neutropenia
LAML	haematopoietic_and_lymphoid_tissue	NS	NS	NS	haematopoietic_neoplasm	acute_myeloid_leukaemia	M0_1	NS
LAML	haematopoietic_and_lymphoid_tissue	NS	NS	NS	haematopoietic_neoplasm	acute_myeloid_leukaemia	M0	NS
LAML	haematopoietic_and_lymphoid_tissue	NS	NS	NS	haematopoietic_neoplasm	acute_myeloid_leukaemia	M1_2	NS
LAML	haematopoietic_and_lymphoid_tissue	NS	NS	NS	haematopoietic_neoplasm	acute_myeloid_leukaemia	M1	NS
LAML	haematopoietic_and_lymphoid_tissue	NS	NS	NS	haematopoietic_neoplasm	acute_myeloid_leukaemia	M2a	NS
LAML	haematopoietic_and_lymphoid_tissue	NS	NS	NS	haematopoietic_neoplasm	acute_myeloid_leukaemia	M2Eo	NS
LAML	haematopoietic_and_lymphoid_tissue	NS	NS	NS	haematopoietic_neoplasm	acute_myeloid_leukaemia	M2	NS
LAML	haematopoietic_and_lymphoid_tissue	NS	NS	NS	haematopoietic_neoplasm	acute_myeloid_leukaemia	M3	NS
LAML	haematopoietic_and_lymphoid_tissue	NS	NS	NS	haematopoietic_neoplasm	acute_myeloid_leukaemia	M3v	NS
LAML	haematopoietic_and_lymphoid_tissue	NS	NS	NS	haematopoietic_neoplasm	acute_myeloid_leukaemia	M4_5	NS
LAML	haematopoietic_and_lymphoid_tissue	NS	NS	NS	haematopoietic_neoplasm	acute_myeloid_leukaemia	M4Eo	NS
LAML	haematopoietic_and_lymphoid_tissue	NS	NS	NS	haematopoietic_neoplasm	acute_myeloid_leukaemia	M4	NS
LAML	haematopoietic_and_lymphoid_tissue	NS	NS	NS	haematopoietic_neoplasm	acute_myeloid_leukaemia	M5a	NS
LAML	haematopoietic_and_lymphoid_tissue	NS	NS	NS	haematopoietic_neoplasm	acute_myeloid_leukaemia	M5b	NS
LAML	haematopoietic_and_lymphoid_tissue	NS	NS	NS	haematopoietic_neoplasm	acute_myeloid_leukaemia	M5	NS
LAML	haematopoietic_and_lymphoid_tissue	NS	NS	NS	haematopoietic_neoplasm	acute_myeloid_leukaemia	M6	NS
LAML	haematopoietic_and_lymphoid_tissue	NS	NS	NS	haematopoietic_neoplasm	acute_myeloid_leukaemia	M7	NS
LAML	haematopoietic_and_lymphoid_tissue	NS	NS	NS	haematopoietic_neoplasm	acute_myeloid_leukaemia	M8	NS
LAML	haematopoietic_and_lymphoid_tissue	NS	NS	NS	haematopoietic_neoplasm	acute_myeloid_leukaemia_myelodysplastic_syndrome_NOS	NS	NS
LAML	haematopoietic_and_lymphoid_tissue	NS	NS	NS	haematopoietic_neoplasm	acute_myeloid_leukaemia_myelodysplastic_syndrome_therapy_related_NOS	NS	NS
LAML	haematopoietic_and_lymphoid_tissue	NS	NS	NS	haematopoietic_neoplasm	acute_myeloid_leukaemia	non_M3	NS
LAML	haematopoietic_and_lymphoid_tissue	NS	NS	NS	haematopoietic_neoplasm	acute_myeloid_leukaemia	normal_karyotype	NS
LAML	haematopoietic_and_lymphoid_tissue	NS	NS	NS	haematopoietic_neoplasm	acute_myeloid_leukaemia	NS	NS
LAML	haematopoietic_and_lymphoid_tissue	NS	NS	NS	haematopoietic_neoplasm	acute_myeloid_leukaemia	Ph_positive	NS
LAML	haematopoietic_and_lymphoid_tissue	NS	NS	NS	haematopoietic_neoplasm	acute_myeloid_leukaemia_therapy_related	M0	NS
LAML	haematopoietic_and_lymphoid_tissue	NS	NS	NS	haematopoietic_neoplasm	acute_myeloid_leukaemia_therapy_related	M1	NS
LAML	haematopoietic_and_lymphoid_tissue	NS	NS	NS	haematopoietic_neoplasm	acute_myeloid_leukaemia_therapy_related	M2	NS
LAML	haematopoietic_and_lymphoid_tissue	NS	NS	NS	haematopoietic_neoplasm	acute_myeloid_leukaemia_therapy_related	M3	NS
LAML	haematopoietic_and_lymphoid_tissue	NS	NS	NS	haematopoietic_neoplasm	acute_myeloid_leukaemia_therapy_related	M4Eo	NS
LAML	haematopoietic_and_lymphoid_tissue	NS	NS	NS	haematopoietic_neoplasm	acute_myeloid_leukaemia_therapy_related	M4	NS
LAML	haematopoietic_and_lymphoid_tissue	NS	NS	NS	haematopoietic_neoplasm	acute_myeloid_leukaemia_therapy_related	M5a	NS
LAML	haematopoietic_and_lymphoid_tissue	NS	NS	NS	haematopoietic_neoplasm	acute_myeloid_leukaemia_therapy_related	M5b	NS
LAML	haematopoietic_and_lymphoid_tissue	NS	NS	NS	haematopoietic_neoplasm	acute_myeloid_leukaemia_therapy_related	M5	NS
LAML	haematopoietic_and_lymphoid_tissue	NS	NS	NS	haematopoietic_neoplasm	acute_myeloid_leukaemia_therapy_related	M6	NS
LAML	haematopoietic_and_lymphoid_tissue	NS	NS	NS	haematopoietic_neoplasm	acute_myeloid_leukaemia_therapy_related	M7	NS
LAML	haematopoietic_and_lymphoid_tissue	NS	NS	NS	haematopoietic_neoplasm	acute_myeloid_leukaemia_therapy_related	non_M3	NS
LAML	haematopoietic_and_lymphoid_tissue	NS	NS	NS	haematopoietic_neoplasm	acute_myeloid_leukaemia_therapy_related	NS	NS
LAML	haematopoietic_and_lymphoid_tissue	NS	NS	NS	haematopoietic_neoplasm	acute_myeloid_leukaemia	unclassifiable	NS
LAML	haematopoietic_and_lymphoid_tissue	NS	NS	NS	haematopoietic_neoplasm	acute_myeloid_leukaemia	with_recurrent_cytogenetic_abnormalities	MLL_fusion
LAML	haematopoietic_and_lymphoid_tissue	NS	NS	NS	haematopoietic_neoplasm	acute_myeloid_leukaemia	with_recurrent_cytogenetic_abnormalities	NS
LAML	haematopoietic_and_lymphoid_tissue	NS	NS	NS	haematopoietic_neoplasm	acute_myeloid_leukaemia	with_recurrent_cytogenetic_abnormalities	t(15;17)
LGG	central_nervous_system	basal_ganglia	NS	NS	glioma	astrocytoma_Grade_II	fibrillary	NS
LGG	central_nervous_system	basal_ganglia	NS	NS	glioma	astrocytoma_Grade_III	anaplastic	NS
LGG	central_nervous_system	basal_ganglia	NS	NS	glioma	oligodendroglioma_Grade_III	anaplastic	NS
LGG	central_nervous_system	brain	NS	NS	glioma	astroblastoma_Grade_III	NS	NS
LGG	central_nervous_system	brain	NS	NS	glioma	astrocytoma_Grade_II	fibrillary	NS
LGG	central_nervous_system	brain	NS	NS	glioma	astrocytoma_Grade_II	gemistocytic	NS
LGG	central_nervous_system	brain	NS	NS	glioma	astrocytoma_Grade_III	anaplastic	NS
LGG	central_nervous_system	brain	NS	NS	glioma	astrocytoma_Grade_III	gemistocytic	NS
LGG	central_nervous_system	brain	NS	NS	glioma	astrocytoma_Grade_III	pleomorphic_xanthoastrocytoma	NS
LGG	central_nervous_system	brain	NS	NS	glioma	astrocytoma_Grade_II	pleomorphic_xanthoastrocytoma	NS
LGG	central_nervous_system	brain	NS	NS	glioma	ependymoma_Grade_II	NS	NS
LGG	central_nervous_system	brain	NS	NS	glioma	oligoastrocytoma_Grade_III	anaplastic	NS
LGG	central_nervous_system	brain	NS	NS	glioma	oligoastrocytoma_Grade_II	NS	NS
LGG	central_nervous_system	brain	NS	NS	glioma	oligodendroglioma_Grade_III	anaplastic	NS
LGG	central_nervous_system	brain	NS	NS	glioma	oligodendroglioma_Grade_II	NS	NS
LGG	central_nervous_system	brainstem	NS	NS	glioma	astrocytoma_Grade_II	fibrillary	NS
LGG	central_nervous_system	brainstem	NS	NS	glioma	astrocytoma_Grade_III	anaplastic	NS
LGG	central_nervous_system	brainstem	NS	NS	glioma	oligoastrocytoma_Grade_III	anaplastic	NS
LGG	central_nervous_system	brainstem	NS	NS	glioma	oligoastrocytoma_Grade_II	NS	NS
LGG	central_nervous_system	brainstem	NS	NS	glioma	oligodendroglioma_Grade_III	anaplastic	NS
LGG	central_nervous_system	cerebellum	NS	NS	glioma	astrocytoma_Grade_II	fibrillary	NS
LGG	central_nervous_system	cerebellum	NS	NS	glioma	astrocytoma_Grade_III	anaplastic	NS
LGG	central_nervous_system	cerebellum	NS	NS	glioma	oligoastrocytoma_Grade_III	anaplastic	NS
LGG	central_nervous_system	cerebellum	NS	NS	glioma	oligoastrocytoma_Grade_II	NS	NS
LGG	central_nervous_system	cerebellum	NS	NS	glioma	oligodendroglioma_Grade_III	anaplastic	NS
LGG	central_nervous_system	cerebellum	NS	NS	glioma	oligodendroglioma_Grade_II	NS	NS
LGG	central_nervous_system	cerebral_cortex	NS	NS	glioma	astrocytoma_Grade_II	fibrillary	NS
LGG	central_nervous_system	cerebral_cortex	NS	NS	glioma	astrocytoma_Grade_III	anaplastic	NS
LGG	central_nervous_system	cerebral_cortex	NS	NS	glioma	astrocytoma_Grade_II	pleomorphic_xanthoastrocytoma	NS
LGG	central_nervous_system	cerebral_cortex	NS	NS	glioma	oligoastrocytoma_Grade_II	NS	NS
LGG	central_nervous_system	cerebral_cortex	NS	NS	glioma	oligodendroglioma_Grade_III	anaplastic	NS
LGG	central_nervous_system	cerebral_cortex	NS	NS	glioma	oligodendroglioma_Grade_II	NS	NS
LGG	central_nervous_system	cerebral_hemisphere	NS	NS	glioma	astrocytoma_Grade_III	anaplastic	NS
LGG	central_nervous_system	cerebrum	NS	NS	glioma	astrocytoma_Grade_II	gemistocytic	NS
LGG	central_nervous_system	cerebrum	NS	NS	glioma	astrocytoma_Grade_III	anaplastic	NS
LGG	central_nervous_system	corpus_callosum	NS	NS	glioma	astrocytoma_Grade_II	fibrillary	NS
LGG	central_nervous_system	corpus_callosum	NS	NS	glioma	astrocytoma_Grade_III	anaplastic	NS
LGG	central_nervous_system	diencephalon	NS	NS	glioma	astrocytoma_Grade_II	fibrillary	NS
LGG	central_nervous_system	fourth_ventricle	NS	NS	glioma	ependymoma_Grade_II	NS	NS
LGG	central_nervous_system	frontal_lobe	NS	NS	glioma	astroblastoma_Grade_III	NS	NS
LGG	central_nervous_system	frontal_lobe	NS	NS	glioma	astrocytoma_Grade_II	fibrillary	NS
LGG	central_nervous_system	frontal_lobe	NS	NS	glioma	astrocytoma_Grade_II	gemistocytic	NS
LGG	central_nervous_system	frontal_lobe	NS	NS	glioma	astrocytoma_Grade_III	anaplastic	NS
LGG	central_nervous_system	frontal_lobe	NS	NS	glioma	astrocytoma_Grade_III	pleomorphic_xanthoastrocytoma	NS
LGG	central_nervous_system	frontal_lobe	NS	NS	glioma	astrocytoma_Grade_II	pleomorphic_xanthoastrocytoma	NS
LGG	central_nervous_system	frontal_lobe	NS	NS	glioma	oligoastrocytoma_Grade_III	anaplastic	NS
LGG	central_nervous_system	frontal_lobe	NS	NS	glioma	oligoastrocytoma_Grade_II	NS	NS
LGG	central_nervous_system	frontal_lobe	NS	NS	glioma	oligodendroglioma_Grade_III	anaplastic	NS
LGG	central_nervous_system	frontal_lobe	NS	NS	glioma	oligodendroglioma_Grade_II	NS	NS
LGG	central_nervous_system	frontobasal	NS	NS	glioma	oligodendroglioma_Grade_III	anaplastic	NS
LGG	central_nervous_system	frontoparietal	NS	NS	glioma	astrocytoma_Grade_II	fibrillary	NS
LGG	central_nervous_system	frontoparietal	NS	NS	glioma	astrocytoma_Grade_III	anaplastic	NS
LGG	central_nervous_system	frontoparietal	NS	NS	glioma	astrocytoma_Grade_III	pleomorphic_xanthoastrocytoma	NS
LGG	central_nervous_system	frontoparietal	NS	NS	glioma	oligoastrocytoma_Grade_III	anaplastic	NS
LGG	central_nervous_system	frontoparietal	NS	NS	glioma	oligoastrocytoma_Grade_II	NS	NS
LGG	central_nervous_system	frontoparietal	NS	NS	glioma	oligodendroglioma_Grade_III	anaplastic	NS
LGG	central_nervous_system	frontoparietal	NS	NS	glioma	oligodendroglioma_Grade_II	NS	NS
LGG	central_nervous_system	frontotemporal	NS	NS	glioma	astrocytoma_Grade_II	fibrillary	NS
LGG	central_nervous_system	frontotemporal	NS	NS	glioma	astrocytoma_Grade_III	anaplastic	NS
LGG	central_nervous_system	frontotemporal	NS	NS	glioma	astrocytoma_Grade_III	pleomorphic_xanthoastrocytoma	NS
LGG	central_nervous_system	frontotemporal	NS	NS	glioma	oligoastrocytoma_Grade_II	NS	NS
LGG	central_nervous_system	frontotemporal	NS	NS	glioma	oligodendroglioma_Grade_III	anaplastic	NS
LGG	central_nervous_system	frontotemporal	NS	NS	glioma	oligodendroglioma_Grade_II	NS	NS
LGG	central_nervous_system	hypothalamus	NS	NS	glioma	astrocytoma_Grade_II	fibrillary	NS
LGG	central_nervous_system	infratentorial	NS	NS	glioma	astrocytoma_Grade_II	fibrillary	NS
LGG	central_nervous_system	intraventricular	NS	NS	glioma	astrocytoma_Grade_II	fibrillary	NS
LGG	central_nervous_system	intraventricular	NS	NS	glioma	astrocytoma_Grade_III	anaplastic	NS
LGG	central_nervous_system	lateral_ventricle	NS	NS	glioma	astrocytoma_Grade_II	pleomorphic_xanthoastrocytoma	NS
LGG	central_nervous_system	lateral_ventricle	NS	NS	glioma	ependymoma_Grade_II	NS	NS
LGG	central_nervous_system	lateral_ventricle	NS	NS	glioma	oligodendroglioma_Grade_II	NS	NS
LGG	central_nervous_system	lateral_ventricle_trigone	NS	NS	glioma	astrocytoma_Grade_III	anaplastic	NS
LGG	central_nervous_system	lateral_ventricle_trigone	NS	NS	glioma	oligoastrocytoma_Grade_II	NS	NS
LGG	central_nervous_system	medulla	NS	NS	glioma	astrocytoma_Grade_II	fibrillary	NS
LGG	central_nervous_system	medulla	NS	NS	glioma	astrocytoma_Grade_III	anaplastic	NS
LGG	central_nervous_system	medulla	NS	NS	glioma	oligoastrocytoma_Grade_II	NS	NS
LGG	central_nervous_system	medulla	NS	NS	glioma	oligodendroglioma_Grade_III	anaplastic	NS
LGG	central_nervous_system	midbrain	NS	NS	glioma	astrocytoma_Grade_II	fibrillary	NS
LGG	central_nervous_system	midbrain	NS	NS	glioma	astrocytoma_Grade_III	anaplastic	NS
LGG	central_nervous_system	midbrain	NS	NS	glioma	oligoastrocytoma_Grade_III	anaplastic	NS
LGG	central_nervous_system	occipital_lobe	NS	NS	glioma	astrocytoma_Grade_II	fibrillary	NS
LGG	central_nervous_system	occipital_lobe	NS	NS	glioma	astrocytoma_Grade_II	gemistocytic	NS
LGG	central_nervous_system	occipital_lobe	NS	NS	glioma	astrocytoma_Grade_III	anaplastic	NS
LGG	central_nervous_system	occipital_lobe	NS	NS	glioma	ependymoma_Grade_II	NS	NS
LGG	central_nervous_system	occipital_lobe	NS	NS	glioma	oligoastrocytoma_Grade_II	NS	NS
LGG	central_nervous_system	occipital_lobe	NS	NS	glioma	oligodendroglioma_Grade_II	NS	NS
LGG	central_nervous_system	parietal_lobe	NS	NS	glioma	astroblastoma_Grade_III	NS	NS
LGG	central_nervous_system	parietal_lobe	NS	NS	glioma	astrocytoma_Grade_II	fibrillary	NS
LGG	central_nervous_system	parietal_lobe	NS	NS	glioma	astrocytoma_Grade_II	gemistocytic	NS
LGG	central_nervous_system	parietal_lobe	NS	NS	glioma	astrocytoma_Grade_III	anaplastic	NS
LGG	central_nervous_system	parietal_lobe	NS	NS	glioma	astrocytoma_Grade_II	pleomorphic_xanthoastrocytoma	NS
LGG	central_nervous_system	parietal_lobe	NS	NS	glioma	ependymoma_Grade_II	NS	NS
LGG	central_nervous_system	parietal_lobe	NS	NS	glioma	oligoastrocytoma_Grade_III	anaplastic	NS
LGG	central_nervous_system	parietal_lobe	NS	NS	glioma	oligoastrocytoma_Grade_II	NS	NS
LGG	central_nervous_system	parietal_lobe	NS	NS	glioma	oligodendroglioma_Grade_III	anaplastic	NS
LGG	central_nervous_system	parietal_lobe	NS	NS	glioma	oligodendroglioma_Grade_II	NS	NS
LGG	central_nervous_system	parietooccipital	NS	NS	glioma	astrocytoma_Grade_II	fibrillary	NS
LGG	central_nervous_system	parietooccipital	NS	NS	glioma	astrocytoma_Grade_III	anaplastic	NS
LGG	central_nervous_system	parietooccipital	NS	NS	glioma	astrocytoma_Grade_II	pleomorphic_xanthoastrocytoma	NS
LGG	central_nervous_system	parietooccipital	NS	NS	glioma	oligoastrocytoma_Grade_III	anaplastic	NS
LGG	central_nervous_system	parietooccipital	NS	NS	glioma	oligoastrocytoma_Grade_II	NS	NS
LGG	central_nervous_system	parietooccipital	NS	NS	glioma	oligodendroglioma_Grade_III	anaplastic	NS
LGG	central_nervous_system	parietooccipital	NS	NS	glioma	oligodendroglioma_Grade_II	NS	NS
LGG	central_nervous_system	pineal_gland	NS	NS	glioma	astrocytoma_Grade_II	fibrillary	NS
LGG	central_nervous_system	pineal_gland	NS	NS	glioma	astrocytoma_Grade_III	anaplastic	NS
LGG	central_nervous_system	supratentorial	NS	NS	glioma	astrocytoma_Grade_II	fibrillary	NS
LGG	central_nervous_system	supratentorial	NS	NS	glioma	astrocytoma_Grade_III	anaplastic	NS
LGG	central_nervous_system	supratentorial	NS	NS	glioma	oligoastrocytoma_Grade_II	NS	NS
LGG	central_nervous_system	supratentorial	NS	NS	glioma	oligodendroglioma_Grade_II	NS	NS
LGG	central_nervous_system	temporal_lobe	NS	NS	glioma	astroblastoma_Grade_III	NS	NS
LGG	central_nervous_system	temporal_lobe	NS	NS	glioma	astrocytoma_Grade_II	fibrillary	NS
LGG	central_nervous_system	temporal_lobe	NS	NS	glioma	astrocytoma_Grade_II	gemistocytic	NS
LGG	central_nervous_system	temporal_lobe	NS	NS	glioma	astrocytoma_Grade_III	anaplastic	NS
LGG	central_nervous_system	temporal_lobe	NS	NS	glioma	astrocytoma_Grade_III	pleomorphic_xanthoastrocytoma	NS
LGG	central_nervous_system	temporal_lobe	NS	NS	glioma	astrocytoma_Grade_II	pleomorphic_xanthoastrocytoma	NS
LGG	central_nervous_system	temporal_lobe	NS	NS	glioma	oligoastrocytoma_Grade_III	anaplastic	NS
LGG	central_nervous_system	temporal_lobe	NS	NS	glioma	oligoastrocytoma_Grade_II	NS	NS
LGG	central_nervous_system	temporal_lobe	NS	NS	glioma	oligodendroglioma_Grade_III	anaplastic	NS
LGG	central_nervous_system	temporal_lobe	NS	NS	glioma	oligodendroglioma_Grade_II	NS	NS
LGG	central_nervous_system	temporobasal	NS	NS	glioma	oligodendroglioma_Grade_III	anaplastic	NS
LGG	central_nervous_system	temporobasal	NS	NS	glioma	oligodendroglioma_Grade_II	NS	NS
LGG	central_nervous_system	temporooccipital	NS	NS	glioma	astrocytoma_Grade_III	anaplastic	NS
LGG	central_nervous_system	temporooccipital	NS	NS	glioma	oligoastrocytoma_Grade_III	anaplastic	NS
LGG	central_nervous_system	temporooccipital	NS	NS	glioma	oligodendroglioma_Grade_III	anaplastic	NS
LGG	central_nervous_system	temporoparietal	NS	NS	glioma	astrocytoma_Grade_II	pleomorphic_xanthoastrocytoma	NS
LGG	central_nervous_system	temporoparietal	NS	NS	glioma	oligoastrocytoma_Grade_III	anaplastic	NS
LGG	central_nervous_system	temporoparietal	NS	NS	glioma	oligodendroglioma_Grade_III	anaplastic	NS
LGG	central_nervous_system	temporoparietal	NS	NS	glioma	oligodendroglioma_Grade_II	NS	NS
LGG	central_nervous_system	thalamus	NS	NS	glioma	astrocytoma_Grade_II	fibrillary	NS
LGG	central_nervous_system	thalamus	NS	NS	glioma	astrocytoma_Grade_III	anaplastic	NS
LGG	central_nervous_system	thalamus	NS	NS	glioma	astrocytoma_Grade_III	pleomorphic_xanthoastrocytoma	NS
LGG	central_nervous_system	thalamus	NS	NS	glioma	oligoastrocytoma_Grade_III	anaplastic	NS
LGG	central_nervous_system	thalamus	NS	NS	glioma	oligoastrocytoma_Grade_II	NS	NS
LGG	central_nervous_system	thalamus	NS	NS	glioma	oligodendroglioma_Grade_III	anaplastic	NS
LGG	central_nervous_system	thalamus	NS	NS	glioma	oligodendroglioma_Grade_II	NS	NS
LGG	central_nervous_system	third_ventricle	NS	NS	glioma	astrocytoma_Grade_II	fibrillary	NS
LIHC	liver	NS	NS	NS	carcinoma	hepatocellular_carcinoma	NS	NS
LUAD	lung	left_bronchus	NS	NS	carcinoma	adenocarcinoma	NS	NS
LUAD	lung	left_lower_lobe	NS	NS	carcinoma	acinar_adenocarcinoma	NS	NS
LUAD	lung	left_lower_lobe	NS	NS	carcinoma	adenocarcinoma	NS	NS
LUAD	lung	left_lower_lobe	NS	NS	carcinoma	bronchioloalveolar_adenocarcinoma	NS	NS
LUAD	lung	left_lower_lobe	NS	NS	carcinoma	micropapillary_adenocarcinoma	NS	NS
LUAD	lung	left	NS	NS	carcinoma	adenocarcinoma	NS	NS
LUAD	lung	left	NS	NS	carcinoma	bronchioloalveolar_adenocarcinoma	NS	NS
LUAD	lung	left_upper_lobe	NS	NS	carcinoma	acinar_adenocarcinoma	NS	NS
LUAD	lung	left_upper_lobe	NS	NS	carcinoma	adenocarcinoma	NS	NS
LUAD	lung	left_upper_lobe	NS	NS	carcinoma	bronchioloalveolar_adenocarcinoma	NS	NS
LUAD	lung	left_upper_lobe	NS	NS	carcinoma	micropapillary_adenocarcinoma	NS	NS
LUAD	lung	left_upper_lobe	NS	NS	carcinoma	mixed_small_cell_carcinoma-adenocarcinoma	NS	NS
LUAD	lung	lower_lobe	NS	NS	carcinoma	adenocarcinoma	NS	NS
LUAD	lung	middle_lobe	NS	NS	carcinoma	adenocarcinoma	NS	NS
LUAD	lung	middle_lobe	NS	NS	carcinoma	bronchioloalveolar_adenocarcinoma	NS	NS
LUAD	lung	NS	NS	NS	carcinoma	acinar_adenocarcinoma	NS	NS
LUAD	lung	NS	NS	NS	carcinoma	adenocarcinoma	NS	NS
LUAD	lung	NS	NS	NS	carcinoma	bronchioloalveolar_adenocarcinoma	NS	NS
LUAD	lung	NS	NS	NS	carcinoma	micropapillary_adenocarcinoma	NS	NS
LUAD	lung	NS	NS	NS	carcinoma	mixed_small_cell_carcinoma-adenocarcinoma	NS	NS
LUAD	lung	NS	NS	NS	carcinoma	oncocytic_adenocarcinoma	NS	NS
LUAD	lung	NS	NS	NS	carcinoma	signet_ring_cell_adenocarcinoma	NS	NS
LUAD	lung	NS	NS	NS	carcinoma	terminal_respiratory_unit_type_adenocarcinoma	NS	NS
LUAD	lung	right_bronchus	NS	NS	carcinoma	adenocarcinoma	NS	NS
LUAD	lung	right_lower_lobe	NS	NS	carcinoma	acinar_adenocarcinoma	NS	NS
LUAD	lung	right_lower_lobe	NS	NS	carcinoma	adenocarcinoma	NS	NS
LUAD	lung	right_lower_lobe	NS	NS	carcinoma	bronchioloalveolar_adenocarcinoma	NS	NS
LUAD	lung	right_lower_lobe	NS	NS	carcinoma	mixed_small_cell_carcinoma-adenocarcinoma	NS	NS
LUAD	lung	right_lower_lobe	NS	NS	carcinoma	signet_ring_cell_adenocarcinoma	NS	NS
LUAD	lung	right_middle_lobe	NS	NS	carcinoma	acinar_adenocarcinoma	NS	NS
LUAD	lung	right_middle_lobe	NS	NS	carcinoma	adenocarcinoma	NS	NS
LUAD	lung	right_middle_lobe	NS	NS	carcinoma	bronchioloalveolar_adenocarcinoma	NS	NS
LUAD	lung	right	NS	NS	carcinoma	adenocarcinoma	NS	NS
LUAD	lung	right	NS	NS	carcinoma	bronchioloalveolar_adenocarcinoma	NS	NS
LUAD	lung	right_upper_lobe	NS	NS	carcinoma	acinar_adenocarcinoma	NS	NS
LUAD	lung	right_upper_lobe	NS	NS	carcinoma	adenocarcinoma	NS	NS
LUAD	lung	right_upper_lobe	NS	NS	carcinoma	bronchioloalveolar_adenocarcinoma	NS	NS
LUAD	lung	right_upper_lobe	NS	NS	carcinoma	micropapillary_adenocarcinoma	NS	NS
LUAD	lung	right_upper_lobe	NS	NS	carcinoma	mixed_mucoepidermoid_carcinoma-adenocarcinoma	NS	NS
LUAD	lung	right_upper_lobe	NS	NS	carcinoma	mixed_small_cell_carcinoma-adenocarcinoma	NS	NS
LUAD	lung	upper_lobe	NS	NS	carcinoma	adenocarcinoma	NS	NS
LUSC	lung	bronchus	NS	NS	carcinoma	squamous_cell_carcinoma	NS	NS
LUSC	lung	left_lower_lobe	NS	NS	carcinoma	squamous_cell_carcinoma	NS	NS
LUSC	lung	left	NS	NS	carcinoma	squamous_cell_carcinoma	NS	NS
LUSC	lung	left_upper_lobe	NS	NS	carcinoma	squamous_cell_carcinoma	NS	NS
LUSC	lung	lower_lobe	NS	NS	carcinoma	squamous_cell_carcinoma	NS	NS
LUSC	lung	NS	NS	NS	carcinoma	squamous_cell_carcinoma	NS	NS
LUSC	lung	right_lower_lobe	NS	NS	carcinoma	squamous_cell_carcinoma	NS	NS
LUSC	lung	right_upper_lobe	NS	NS	carcinoma	squamous_cell_carcinoma	NS	NS
LUSC	lung	upper_lobe	NS	NS	carcinoma	squamous_cell_carcinoma	NS	NS
MESO	NS	NS	NS	NS	mesothelioma	NS	NS	NS
MESO	pericardium	NS	NS	NS	mesothelioma	epithelial	NS	NS
MESO	pericardium	NS	NS	NS	mesothelioma	NS	NS	NS
MESO	peritoneum	NS	NS	NS	mesothelioma	biphasic	NS	NS
MESO	peritoneum	NS	NS	NS	mesothelioma	epithelial	NS	NS
MESO	peritoneum	NS	NS	NS	mesothelioma	multicystic	NS	NS
MESO	peritoneum	NS	NS	NS	mesothelioma	NS	NS	NS
MESO	peritoneum	NS	NS	NS	mesothelioma	papillary	NS	NS
MESO	peritoneum	NS	NS	NS	mesothelioma	sarcomatous-fibrous	NS	NS
MESO	pleura	NS	NS	NS	mesothelioma	biphasic	NS	NS
MESO	pleura	NS	NS	NS	mesothelioma	epithelial	NS	NS
MESO	pleura	NS	NS	NS	mesothelioma	NS	NS	NS
MESO	pleura	NS	NS	NS	mesothelioma	sarcomatous-fibrous	NS	NS
MESO	testis	tunica_vaginalis	NS	NS	mesothelioma	epithelial	NS	NS
OV	ovary	NS	NS	NS	carcinoma	serous_adenocarcinofibroma	NS	NS
PAAD	pancreas	NS	NS	NS	carcinoma	adenocarcinoma	NS	NS
PAAD	pancreas	NS	NS	NS	carcinoma	serous_cystadenocarcinoma	NS	NS
PCPG	adrenal_gland	adrenal_gland	NS	NS	pheochromocytoma	benign	NS	NS
PCPG	adrenal_gland	adrenal_gland	NS	NS	pheochromocytoma	malignant	NS	NS
PCPG	adrenal_gland	adrenal_gland	NS	NS	pheochromocytoma	NS	NS	NS
PCPG	adrenal_gland	extraadrenal	NS	NS	pheochromocytoma	benign	NS	NS
PCPG	adrenal_gland	extraadrenal	NS	NS	pheochromocytoma	malignant	NS	NS
PCPG	adrenal_gland	extraadrenal	NS	NS	pheochromocytoma	NS	NS	NS
PCPG	adrenal_gland	NS	NS	NS	pheochromocytoma	NS	NS	NS
PCPG	autonomic_ganglia	abdomen	NS	NS	paraganglioma	benign	NS	NS
PCPG	autonomic_ganglia	abdomen	NS	NS	paraganglioma	malignant	NS	NS
PCPG	autonomic_ganglia	abdomen	NS	NS	paraganglioma	NS	NS	NS
PCPG	autonomic_ganglia	adrenal_gland	NS	NS	paraganglioma	benign	NS	NS
PCPG	autonomic_ganglia	bladder	NS	NS	paraganglioma	benign	NS	NS
PCPG	autonomic_ganglia	bladder	NS	NS	paraganglioma	malignant	NS	NS
PCPG	autonomic_ganglia	bladder	NS	NS	paraganglioma	NS	NS	NS
PCPG	autonomic_ganglia	chest_wall	NS	NS	paraganglioma	benign	NS	NS
PCPG	autonomic_ganglia	extraadrenal	NS	NS	paraganglioma	NS	NS	NS
PCPG	autonomic_ganglia	head_neck	carotid_body	NS	paraganglioma	benign	NS	NS
PCPG	autonomic_ganglia	head_neck	carotid_body	NS	paraganglioma	NS	NS	NS
PCPG	autonomic_ganglia	head_neck	jugular_fossa_and_tympanic_cavity	NS	paraganglioma	benign	NS	NS
PCPG	autonomic_ganglia	head_neck	jugular_fossa_and_tympanic_cavity	NS	paraganglioma	malignant	NS	NS
PCPG	autonomic_ganglia	head_neck	jugular_fossa	NS	paraganglioma	benign	NS	NS
PCPG	autonomic_ganglia	head_neck	NS	NS	paraganglioma	benign	NS	NS
PCPG	autonomic_ganglia	head_neck	NS	NS	paraganglioma	NS	NS	NS
PCPG	autonomic_ganglia	head_neck	vagus_nerve	NS	paraganglioma	benign	NS	NS
PCPG	autonomic_ganglia	NS	NS	NS	paraganglioma	benign	NS	NS
PCPG	autonomic_ganglia	NS	NS	NS	paraganglioma	malignant	NS	NS
PCPG	autonomic_ganglia	NS	NS	NS	paraganglioma	NS	NS	NS
PCPG	autonomic_ganglia	para_aortic	NS	NS	paraganglioma	benign	NS	NS
PCPG	autonomic_ganglia	retroperitoneum	NS	NS	paraganglioma	malignant	NS	NS
PCPG	autonomic_ganglia	thoraco-abdomen	NS	NS	paraganglioma	NS	NS	NS
PRAD	prostate	NS	NS	NS	carcinoma	adenocarcinoma	NS	NS
READ	large_intestine	rectum	NS	NS	carcinoma	adenocarcinoma	NS	NS
SARC	bone	acetabulum	NS	NS	chondrosarcoma	central	NS	NS
SARC	bone	acetabulum	NS	NS	Ewings_sarcoma-peripheral_primitive_neuroectodermal_tumour	NS	NS	NS
SARC	bone	atlas	NS	NS	Ewings_sarcoma-peripheral_primitive_neuroectodermal_tumour	NS	NS	NS
SARC	bone	breast	NS	NS	osteosarcoma	NS	NS	NS
SARC	bone	calcaneus	NS	NS	chondrosarcoma	central	NS	NS
SARC	bone	calcaneus	NS	NS	Ewings_sarcoma-peripheral_primitive_neuroectodermal_tumour	NS	NS	NS
SARC	bone	calcaneus	NS	NS	osteosarcoma	chondroblastic	NS	NS
SARC	bone	chest_wall	NS	NS	chondrosarcoma	dedifferentiated	NS	NS
SARC	bone	chest_wall	NS	NS	Ewings_sarcoma-peripheral_primitive_neuroectodermal_tumour	NS	NS	NS
SARC	bone	clavicle	NS	NS	Ewings_sarcoma-peripheral_primitive_neuroectodermal_tumour	NS	NS	NS
SARC	bone	clavicle	NS	NS	malignant_fibrous_histiocytoma-pleomorphic_sarcoma	NS	NS	NS
SARC	bone	coccyx	NS	NS	Ewings_sarcoma-peripheral_primitive_neuroectodermal_tumour	NS	NS	NS
SARC	bone	cranium	NS	NS	Ewings_sarcoma-peripheral_primitive_neuroectodermal_tumour	NS	NS	NS
SARC	bone	extraskeletal	NS	NS	chondrosarcoma	central	NS	NS
SARC	bone	extraskeletal	NS	NS	chondrosarcoma	conventional	NS	NS
SARC	bone	extraskeletal	NS	NS	chondrosarcoma	mesenchymal	NS	NS
SARC	bone	extraskeletal	NS	NS	chondrosarcoma	myxoid	NS	NS
SARC	bone	extraskeletal	NS	NS	chondrosarcoma	NS	NS	NS
SARC	bone	extraskeletal	NS	NS	Ewings_sarcoma-peripheral_primitive_neuroectodermal_tumour	adamantinoma-like	NS	NS
SARC	bone	extraskeletal	NS	NS	Ewings_sarcoma-peripheral_primitive_neuroectodermal_tumour	atypical-clear_cell	NS	NS
SARC	bone	extraskeletal	NS	NS	Ewings_sarcoma-peripheral_primitive_neuroectodermal_tumour	atypical-large_cell	NS	NS
SARC	bone	extraskeletal	NS	NS	Ewings_sarcoma-peripheral_primitive_neuroectodermal_tumour	atypical	NS	NS
SARC	bone	extraskeletal	NS	NS	Ewings_sarcoma-peripheral_primitive_neuroectodermal_tumour	atypical-pleomorphic	NS	NS
SARC	bone	extraskeletal	NS	NS	Ewings_sarcoma-peripheral_primitive_neuroectodermal_tumour	biphenotypic_with_desmoplastic_small_round_cell_tumour	NS	NS
SARC	bone	extraskeletal	NS	NS	Ewings_sarcoma-peripheral_primitive_neuroectodermal_tumour	NS	NS	NS
SARC	bone	extraskeletal	NS	NS	osteosarcoma	NS	NS	NS
SARC	bone	femur	NS	NS	chondrosarcoma	central	NS	NS
SARC	bone	femur	NS	NS	chondrosarcoma	clear_cell	NS	NS
SARC	bone	femur	NS	NS	chondrosarcoma	conventional	NS	NS
SARC	bone	femur	NS	NS	chondrosarcoma	dedifferentiated	NS	NS
SARC	bone	femur	NS	NS	chondrosarcoma	low_grade_cartilaginous_tumour	NS	NS
SARC	bone	femur	NS	NS	chondrosarcoma	myxoid	NS	NS
SARC	bone	femur	NS	NS	chondrosarcoma	NS	NS	NS
SARC	bone	femur	NS	NS	chondrosarcoma	periosteal	NS	NS
SARC	bone	femur	NS	NS	chondrosarcoma	peripheral	NS	NS
SARC	bone	femur	NS	NS	Ewings_sarcoma-peripheral_primitive_neuroectodermal_tumour	NS	NS	NS
SARC	bone	femur	NS	NS	fibrosarcoma	NS	NS	NS
SARC	bone	femur	NS	NS	malignant_fibrous_histiocytoma-pleomorphic_sarcoma	NS	NS	NS
SARC	bone	femur	NS	NS	osteosarcoma	chondroblastic	NS	NS
SARC	bone	femur	NS	NS	osteosarcoma	fibroblastic	NS	NS
SARC	bone	femur	NS	NS	osteosarcoma	high_grade_surface	NS	NS
SARC	bone	femur	NS	NS	osteosarcoma	mixed	NS	NS
SARC	bone	femur	NS	NS	osteosarcoma	NS	NS	NS
SARC	bone	femur	NS	NS	osteosarcoma	osteoblastic	NS	NS
SARC	bone	femur	NS	NS	osteosarcoma	parosteal	NS	NS
SARC	bone	femur	NS	NS	osteosarcoma	small_cell	NS	NS
SARC	bone	femur	NS	NS	osteosarcoma	telangiectatic	NS	NS
SARC	bone	femur	NS	NS	other	multipotential_sarcoma	NS	NS
SARC	bone	femur	NS	NS	sarcoma	NS	NS	NS
SARC	bone	fibula	NS	NS	chondrosarcoma	central	NS	NS
SARC	bone	fibula	NS	NS	chondrosarcoma	conventional	NS	NS
SARC	bone	fibula	NS	NS	chondrosarcoma	low_grade_cartilaginous_tumour	NS	NS
SARC	bone	fibula	NS	NS	chondrosarcoma	peripheral	NS	NS
SARC	bone	fibula	NS	NS	Ewings_sarcoma-peripheral_primitive_neuroectodermal_tumour	NS	NS	NS
SARC	bone	fibula	NS	NS	osteosarcoma	NS	NS	NS
SARC	bone	fibula	NS	NS	osteosarcoma	osteoblastic	NS	NS
SARC	bone	fibula	NS	NS	osteosarcoma	parosteal	NS	NS
SARC	bone	frontal	NS	NS	chondrosarcoma	conventional	NS	NS
SARC	bone	hip	NS	NS	chondrosarcoma	clear_cell	NS	NS
SARC	bone	humerus	NS	NS	chondrosarcoma	central	NS	NS
SARC	bone	humerus	NS	NS	chondrosarcoma	clear_cell	NS	NS
SARC	bone	humerus	NS	NS	chondrosarcoma	conventional	NS	NS
SARC	bone	humerus	NS	NS	chondrosarcoma	dedifferentiated	NS	NS
SARC	bone	humerus	NS	NS	chondrosarcoma	low_grade_cartilaginous_tumour	NS	NS
SARC	bone	humerus	NS	NS	chondrosarcoma	myxoid	NS	NS
SARC	bone	humerus	NS	NS	chondrosarcoma	NS	NS	NS
SARC	bone	humerus	NS	NS	chondrosarcoma	peripheral	NS	NS
SARC	bone	humerus	NS	NS	Ewings_sarcoma-peripheral_primitive_neuroectodermal_tumour	NS	NS	NS
SARC	bone	humerus	NS	NS	fibrosarcoma	NS	NS	NS
SARC	bone	humerus	NS	NS	malignant_fibrous_histiocytoma-pleomorphic_sarcoma	NS	NS	NS
SARC	bone	humerus	NS	NS	osteosarcoma	chondroblastic	NS	NS
SARC	bone	humerus	NS	NS	osteosarcoma	NS	NS	NS
SARC	bone	humerus	NS	NS	osteosarcoma	osteoblastic	NS	NS
SARC	bone	humerus	NS	NS	osteosarcoma	parosteal	NS	NS
SARC	bone	ilium	NS	NS	chondrosarcoma	dedifferentiated	NS	NS
SARC	bone	ilium	NS	NS	chondrosarcoma	low_grade_cartilaginous_tumour	NS	NS
SARC	bone	ilium	NS	NS	chondrosarcoma	myxoid	NS	NS
SARC	bone	ilium	NS	NS	chondrosarcoma	NS	NS	NS
SARC	bone	ilium	NS	NS	Ewings_sarcoma-peripheral_primitive_neuroectodermal_tumour	atypical	NS	NS
SARC	bone	ilium	NS	NS	Ewings_sarcoma-peripheral_primitive_neuroectodermal_tumour	NS	NS	NS
SARC	bone	ilium	NS	NS	osteosarcoma	NS	NS	NS
SARC	bone	ilium	NS	NS	osteosarcoma	osteoblastic	NS	NS
SARC	bone	ilium	NS	NS	osteosarcoma	Pagets_disease	NS	NS
SARC	bone	ischium	NS	NS	Ewings_sarcoma-peripheral_primitive_neuroectodermal_tumour	NS	NS	NS
SARC	bone	ischium	NS	NS	osteosarcoma	chondroblastic	NS	NS
SARC	bone	knee	NS	NS	chondrosarcoma	synovial	NS	NS
SARC	bone	larynx	NS	NS	chondrosarcoma	clear_cell	NS	NS
SARC	bone	mandible	NS	NS	chondrosarcoma	conventional	NS	NS
SARC	bone	mandible	NS	NS	Ewings_sarcoma-peripheral_primitive_neuroectodermal_tumour	NS	NS	NS
SARC	bone	mandible	NS	NS	osteosarcoma	chondroblastic	NS	NS
SARC	bone	mandible	NS	NS	osteosarcoma	fibroblastic	NS	NS
SARC	bone	mandible	NS	NS	osteosarcoma	NS	NS	NS
SARC	bone	mandible	NS	NS	osteosarcoma	osteoblastic	NS	NS
SARC	bone	maxilla	NS	NS	osteosarcoma	NS	NS	NS
SARC	bone	metacarpus	NS	NS	chondrosarcoma	central	NS	NS
SARC	bone	metacarpus	NS	NS	chondrosarcoma	NS	NS	NS
SARC	bone	metacarpus	NS	NS	Ewings_sarcoma-peripheral_primitive_neuroectodermal_tumour	NS	NS	NS
SARC	bone	metatarsus	NS	NS	chondrosarcoma	NS	NS	NS
SARC	bone	metatarsus	NS	NS	Ewings_sarcoma-peripheral_primitive_neuroectodermal_tumour	NS	NS	NS
SARC	bone	NS	NS	NS	chondrosarcoma	central	NS	NS
SARC	bone	NS	NS	NS	chondrosarcoma	clear_cell	NS	NS
SARC	bone	NS	NS	NS	chondrosarcoma	conventional	NS	NS
SARC	bone	NS	NS	NS	chondrosarcoma	dedifferentiated	NS	NS
SARC	bone	NS	NS	NS	chondrosarcoma	low_grade_cartilaginous_tumour	NS	NS
SARC	bone	NS	NS	NS	chondrosarcoma	mesenchymal	NS	NS
SARC	bone	NS	NS	NS	chondrosarcoma	myxoid	NS	NS
SARC	bone	NS	NS	NS	chondrosarcoma	NS	NS	NS
SARC	bone	NS	NS	NS	chondrosarcoma	periosteal	NS	NS
SARC	bone	NS	NS	NS	chondrosarcoma	peripheral	NS	NS
SARC	bone	NS	NS	NS	Ewings_sarcoma-peripheral_primitive_neuroectodermal_tumour	NS	NS	NS
SARC	bone	NS	NS	NS	fibrosarcoma	NS	NS	NS
SARC	bone	NS	NS	NS	malignant_fibrous_histiocytoma-pleomorphic_sarcoma	NS	NS	NS
SARC	bone	NS	NS	NS	osteosarcoma	chondroblastic	NS	NS
SARC	bone	NS	NS	NS	osteosarcoma	fibroblastic	NS	NS
SARC	bone	NS	NS	NS	osteosarcoma	low_grade_central	NS	NS
SARC	bone	NS	NS	NS	osteosarcoma	mixed	NS	NS
SARC	bone	NS	NS	NS	osteosarcoma	NS	NS	NS
SARC	bone	NS	NS	NS	osteosarcoma	osteoblastic	NS	NS
SARC	bone	NS	NS	NS	osteosarcoma	Pagets_disease	NS	NS
SARC	bone	NS	NS	NS	osteosarcoma	parosteal	NS	NS
SARC	bone	NS	NS	NS	osteosarcoma	periosteal	NS	NS
SARC	bone	NS	NS	NS	osteosarcoma	small_cell	NS	NS
SARC	bone	NS	NS	NS	osteosarcoma	telangiectatic	NS	NS
SARC	bone	NS	NS	NS	sarcoma	NS	NS	NS
SARC	bone	pelvis	NS	NS	chondrosarcoma	central	NS	NS
SARC	bone	pelvis	NS	NS	chondrosarcoma	conventional	NS	NS
SARC	bone	pelvis	NS	NS	chondrosarcoma	dedifferentiated	NS	NS
SARC	bone	pelvis	NS	NS	chondrosarcoma	mesenchymal	NS	NS
SARC	bone	pelvis	NS	NS	chondrosarcoma	myxoid	NS	NS
SARC	bone	pelvis	NS	NS	chondrosarcoma	NS	NS	NS
SARC	bone	pelvis	NS	NS	chondrosarcoma	peripheral	NS	NS
SARC	bone	pelvis	NS	NS	Ewings_sarcoma-peripheral_primitive_neuroectodermal_tumour	NS	NS	NS
SARC	bone	pelvis	NS	NS	fibrosarcoma	NS	NS	NS
SARC	bone	pelvis	NS	NS	malignant_fibrous_histiocytoma-pleomorphic_sarcoma	NS	NS	NS
SARC	bone	pelvis	NS	NS	osteosarcoma	chondroblastic	NS	NS
SARC	bone	pelvis	NS	NS	osteosarcoma	NS	NS	NS
SARC	bone	pelvis	NS	NS	sarcoma	NS	NS	NS
SARC	bone	phalanx	NS	NS	chondrosarcoma	NS	NS	NS
SARC	bone	phalanx	NS	NS	Ewings_sarcoma-peripheral_primitive_neuroectodermal_tumour	NS	NS	NS
SARC	bone	radius	NS	NS	chondrosarcoma	conventional	NS	NS
SARC	bone	radius	NS	NS	chondrosarcoma	low_grade_cartilaginous_tumour	NS	NS
SARC	bone	radius	NS	NS	Ewings_sarcoma-peripheral_primitive_neuroectodermal_tumour	NS	NS	NS
SARC	bone	radius	NS	NS	osteosarcoma	NS	NS	NS
SARC	bone	rib	NS	NS	chondrosarcoma	central	NS	NS
SARC	bone	rib	NS	NS	chondrosarcoma	clear_cell	NS	NS
SARC	bone	rib	NS	NS	chondrosarcoma	conventional	NS	NS
SARC	bone	rib	NS	NS	chondrosarcoma	dedifferentiated	NS	NS
SARC	bone	rib	NS	NS	chondrosarcoma	low_grade_cartilaginous_tumour	NS	NS
SARC	bone	rib	NS	NS	chondrosarcoma	NS	NS	NS
SARC	bone	rib	NS	NS	chondrosarcoma	peripheral	NS	NS
SARC	bone	rib	NS	NS	Ewings_sarcoma-peripheral_primitive_neuroectodermal_tumour	NS	NS	NS
SARC	bone	sacrum	NS	NS	chondrosarcoma	conventional	NS	NS
SARC	bone	sacrum	NS	NS	chondrosarcoma	NS	NS	NS
SARC	bone	sacrum	NS	NS	Ewings_sarcoma-peripheral_primitive_neuroectodermal_tumour	NS	NS	NS
SARC	bone	scapula	NS	NS	chondrosarcoma	central	NS	NS
SARC	bone	scapula	NS	NS	chondrosarcoma	conventional	NS	NS
SARC	bone	scapula	NS	NS	chondrosarcoma	dedifferentiated	NS	NS
SARC	bone	scapula	NS	NS	chondrosarcoma	myxoid	NS	NS
SARC	bone	scapula	NS	NS	chondrosarcoma	NS	NS	NS
SARC	bone	scapula	NS	NS	chondrosarcoma	peripheral	NS	NS
SARC	bone	scapula	NS	NS	Ewings_sarcoma-peripheral_primitive_neuroectodermal_tumour	NS	NS	NS
SARC	bone	scapula	NS	NS	malignant_fibrous_histiocytoma-pleomorphic_sarcoma	NS	NS	NS
SARC	bone	scapula	NS	NS	osteosarcoma	NS	NS	NS
SARC	bone	skull	NS	NS	chondrosarcoma	central	NS	NS
SARC	bone	skull	NS	NS	chondrosarcoma	NS	NS	NS
SARC	bone	skull	NS	NS	Ewings_sarcoma-peripheral_primitive_neuroectodermal_tumour	NS	NS	NS
SARC	bone	sternum	NS	NS	chondrosarcoma	central	NS	NS
SARC	bone	sternum	NS	NS	chondrosarcoma	conventional	NS	NS
SARC	bone	sternum	NS	NS	chondrosarcoma	dedifferentiated	NS	NS
SARC	bone	sternum	NS	NS	chondrosarcoma	peripheral	NS	NS
SARC	bone	sternum	NS	NS	Ewings_sarcoma-peripheral_primitive_neuroectodermal_tumour	NS	NS	NS
SARC	bone	tibia	NS	NS	chondrosarcoma	central	NS	NS
SARC	bone	tibia	NS	NS	chondrosarcoma	clear_cell	NS	NS
SARC	bone	tibia	NS	NS	chondrosarcoma	conventional	NS	NS
SARC	bone	tibia	NS	NS	chondrosarcoma	dedifferentiated	NS	NS
SARC	bone	tibia	NS	NS	chondrosarcoma	low_grade_cartilaginous_tumour	NS	NS
SARC	bone	tibia	NS	NS	chondrosarcoma	NS	NS	NS
SARC	bone	tibia	NS	NS	chondrosarcoma	peripheral	NS	NS
SARC	bone	tibia	NS	NS	Ewings_sarcoma-peripheral_primitive_neuroectodermal_tumour	adamantinoma-like	NS	NS
SARC	bone	tibia	NS	NS	Ewings_sarcoma-peripheral_primitive_neuroectodermal_tumour	NS	NS	NS
SARC	bone	tibia	NS	NS	fibrosarcoma	NS	NS	NS
SARC	bone	tibia	NS	NS	malignant_fibrous_histiocytoma-pleomorphic_sarcoma	NS	NS	NS
SARC	bone	tibia	NS	NS	osteosarcoma	chondroblastic	NS	NS
SARC	bone	tibia	NS	NS	osteosarcoma	fibroblastic	NS	NS
SARC	bone	tibia	NS	NS	osteosarcoma	NS	NS	NS
SARC	bone	tibia	NS	NS	osteosarcoma	osteoblastic	NS	NS
SARC	bone	tibia	NS	NS	osteosarcoma	telangiectatic	NS	NS
SARC	bone	ulna	NS	NS	chondrosarcoma	conventional	NS	NS
SARC	bone	ulna	NS	NS	chondrosarcoma	dedifferentiated	NS	NS
SARC	bone	ulna	NS	NS	Ewings_sarcoma-peripheral_primitive_neuroectodermal_tumour	NS	NS	NS
SARC	bone	vertebrae	NS	NS	chondrosarcoma	central	NS	NS
SARC	bone	vertebrae	NS	NS	chondrosarcoma	clear_cell	NS	NS
SARC	bone	vertebrae	NS	NS	chondrosarcoma	conventional	NS	NS
SARC	bone	vertebrae	NS	NS	chondrosarcoma	dedifferentiated	NS	NS
SARC	bone	vertebrae	NS	NS	chondrosarcoma	mesenchymal	NS	NS
SARC	bone	vertebrae	NS	NS	chondrosarcoma	peripheral	NS	NS
SARC	bone	vertebrae	NS	NS	Ewings_sarcoma-peripheral_primitive_neuroectodermal_tumour	NS	NS	NS
SARC	bone	vertebrae	NS	NS	malignant_fibrous_histiocytoma-pleomorphic_sarcoma	NS	NS	NS
SARC	bone	vertebrae	NS	NS	osteosarcoma	chondroblastic	NS	NS
SARC	breast	NS	NS	NS	carcinoma	ductal_carcinoma	metaplastic_sarcomatoid	NS
SARC	central_nervous_system	brain	NS	NS	glioma	gliosarcoma	NS	NS
SARC	central_nervous_system	cerebellum	NS	NS	glioma	gliosarcoma	NS	NS
SARC	central_nervous_system	corpus_callosum	NS	NS	glioma	gliosarcoma	NS	NS
SARC	central_nervous_system	frontal_lobe	NS	NS	glioma	gliosarcoma	NS	NS
SARC	central_nervous_system	frontotemporal	NS	NS	glioma	gliosarcoma	NS	NS
SARC	central_nervous_system	medulla	NS	NS	glioma	gliosarcoma	NS	NS
SARC	central_nervous_system	parietal_lobe	NS	NS	glioma	gliosarcoma	NS	NS
SARC	central_nervous_system	temporal_lobe	NS	NS	glioma	gliosarcoma	NS	NS
SARC	cervix	NS	NS	NS	carcinoma	carcinosarcoma-malignant_mesodermal_mixed_tumour	NS	NS
SARC	endometrium	NS	NS	NS	carcinoma	carcinosarcoma-malignant_mesodermal_mixed_tumour	NS	NS
SARC	fallopian_tube	NS	NS	NS	carcinoma	carcinosarcoma-malignant_mesodermal_mixed_tumour	NS	NS
SARC	haematopoietic_and_lymphoid_tissue	bone	NS	NS	haematopoietic_neoplasm	mast_cell_neoplasm	mast_cell_sarcoma	NS
SARC	haematopoietic_and_lymphoid_tissue	lip	NS	NS	haematopoietic_neoplasm	mast_cell_neoplasm	mast_cell_sarcoma	NS
SARC	haematopoietic_and_lymphoid_tissue	middle_ear	NS	NS	haematopoietic_neoplasm	mast_cell_neoplasm	mast_cell_sarcoma	NS
SARC	haematopoietic_and_lymphoid_tissue	NS	NS	NS	haematopoietic_neoplasm	granulocytic_sarcoma	NS	NS
SARC	haematopoietic_and_lymphoid_tissue	NS	NS	NS	haematopoietic_neoplasm	mast_cell_neoplasm	mast_cell_sarcoma	NS
SARC	haematopoietic_and_lymphoid_tissue	NS	NS	NS	lymphoid_neoplasm	dendritic_cell_sarcoma	NS	NS
SARC	haematopoietic_and_lymphoid_tissue	NS	NS	NS	lymphoid_neoplasm	follicular_dendritic_cell_sarcoma	inflammatory_pseudotumour-like	NS
SARC	haematopoietic_and_lymphoid_tissue	NS	NS	NS	lymphoid_neoplasm	follicular_dendritic_cell_sarcoma	NS	NS
SARC	haematopoietic_and_lymphoid_tissue	NS	NS	NS	lymphoid_neoplasm	interdigitating_dendritic_cell_sarcoma	NS	NS
SARC	haematopoietic_and_lymphoid_tissue	NS	NS	NS	lymphoid_neoplasm	Langerhans_cell_sarcoma	NS	NS
SARC	haematopoietic_and_lymphoid_tissue	uterus	NS	NS	haematopoietic_neoplasm	mast_cell_neoplasm	mast_cell_sarcoma	NS
SARC	kidney	NS	NS	NS	other	metanephric_adenosarcoma	NS	NS
SARC	large_intestine	colon	ascending	NS	carcinoma	carcinosarcoma	NS	NS
SARC	lung	left_lower_lobe	NS	NS	carcinoma	carcinosarcoma	NS	NS
SARC	lung	left_upper_lobe	NS	NS	carcinoma	carcinosarcoma	NS	NS
SARC	lung	NS	NS	NS	carcinoma	carcinosarcoma	NS	NS
SARC	lung	NS	NS	NS	carcinoma	sarcomatoid_carcinoma	NS	NS
SARC	lung	right_lower_lobe	NS	NS	carcinoma	carcinosarcoma	NS	NS
SARC	lung	right_upper_lobe	NS	NS	carcinoma	carcinosarcoma	NS	NS
SARC	NS	NS	NS	NS	carcinoma	sarcomatoid_carcinoma	NS	NS
SARC	oesophagus	NS	NS	NS	carcinoma	carcinosarcoma	NS	NS
SARC	ovary	NS	NS	NS	carcinoma	carcinosarcoma-malignant_mesodermal_mixed_tumour	NS	NS
SARC	pancreas	NS	NS	NS	carcinoma	carcinosarcoma	NS	NS
SARC	peritoneum	NS	NS	NS	mesothelioma	sarcomatous-fibrous	NS	NS
SARC	pleura	NS	NS	NS	mesothelioma	sarcomatous-fibrous	NS	NS
SARC	salivary_gland	parotid	NS	NS	carcinoma	carcinosarcoma	NS	NS
SARC	skin	forearm	NS	NS	carcinoma	basal_cell_carcinosarcoma	NS	NS
SARC	skin	NS	NS	NS	other	sarcoma	NS	NS
SARC	soft_tissue	blood_vessel	abdomen	NS	angiosarcoma	NS	NS	NS
SARC	soft_tissue	blood_vessel	ankle	NS	angiosarcoma	NS	NS	NS
SARC	soft_tissue	blood_vessel	arm	NS	angiosarcoma	NS	NS	NS
SARC	soft_tissue	blood_vessel	bladder	NS	angiosarcoma	NS	NS	NS
SARC	soft_tissue	blood_vessel	bone	NS	angiosarcoma	NS	NS	NS
SARC	soft_tissue	blood_vessel	breast	NS	angiosarcoma	NS	NS	NS
SARC	soft_tissue	blood_vessel	buttock	NS	angiosarcoma	NS	NS	NS
SARC	soft_tissue	blood_vessel	chest	NS	angiosarcoma	NS	NS	NS
SARC	soft_tissue	blood_vessel	chest_wall	NS	angiosarcoma	NS	NS	NS
SARC	soft_tissue	blood_vessel	ear	NS	angiosarcoma	NS	NS	NS
SARC	soft_tissue	blood_vessel	femur	NS	angiosarcoma	NS	NS	NS
SARC	soft_tissue	blood_vessel	foot	NS	Kaposi_sarcoma	NS	NS	NS
SARC	soft_tissue	blood_vessel	forearm	NS	angiosarcoma	NS	NS	NS
SARC	soft_tissue	blood_vessel	head_neck	NS	angiosarcoma	NS	NS	NS
SARC	soft_tissue	blood_vessel	heart	NS	angiosarcoma	NS	NS	NS
SARC	soft_tissue	blood_vessel	hip	NS	angiosarcoma	NS	NS	NS
SARC	soft_tissue	blood_vessel	leg	NS	angiosarcoma	NS	NS	NS
SARC	soft_tissue	blood_vessel	leg	NS	Kaposi_sarcoma	NS	NS	NS
SARC	soft_tissue	blood_vessel	liver	NS	angiosarcoma	NS	NS	NS
SARC	soft_tissue	blood_vessel	lower_leg	NS	angiosarcoma	NS	NS	NS
SARC	soft_tissue	blood_vessel	lung	NS	angiosarcoma	NS	NS	NS
SARC	soft_tissue	blood_vessel	lymph_node	NS	angiosarcoma	NS	NS	NS
SARC	soft_tissue	blood_vessel	NS	NS	angiosarcoma	NS	NS	NS
SARC	soft_tissue	blood_vessel	NS	NS	Kaposi_sarcoma	NS	NS	NS
SARC	soft_tissue	blood_vessel	NS	NS	lymphangiosarcoma	NS	NS	NS
SARC	soft_tissue	blood_vessel	NS	NS	other	intimal_sarcoma	NS	NS
SARC	soft_tissue	blood_vessel	NS	NS	other	mural_sarcoma	NS	NS
SARC	soft_tissue	blood_vessel	pubis	NS	angiosarcoma	NS	NS	NS
SARC	soft_tissue	blood_vessel	pulmonary_artery	NS	sarcoma	NS	NS	NS
SARC	soft_tissue	blood_vessel	pulmonary_vein	NS	other	intimal_sarcoma	NS	NS
SARC	soft_tissue	blood_vessel	sacrum	NS	angiosarcoma	NS	NS	NS
SARC	soft_tissue	blood_vessel	sciatic_nerve	NS	angiosarcoma	NS	NS	NS
SARC	soft_tissue	blood_vessel	shoulder	NS	angiosarcoma	NS	NS	NS
SARC	soft_tissue	blood_vessel	skin	NS	angiosarcoma	NS	NS	NS
SARC	soft_tissue	blood_vessel	tibia	NS	angiosarcoma	NS	NS	NS
SARC	soft_tissue	blood_vessel	upper_arm	NS	angiosarcoma	NS	NS	NS
SARC	soft_tissue	blood_vessel	upper_leg	NS	angiosarcoma	NS	NS	NS
SARC	soft_tissue	blood_vessel	vagina	NS	angiosarcoma	NS	NS	NS
SARC	soft_tissue	blood_vessel	visceral	NS	angiosarcoma	NS	NS	NS
SARC	soft_tissue	fat	abdomen	NS	liposarcoma	dedifferentiated	NS	NS
SARC	soft_tissue	fat	abdomen	NS	liposarcoma	myxoid-round_cell	NS	NS
SARC	soft_tissue	fat	abdomen	NS	liposarcoma	pleomorphic	NS	NS
SARC	soft_tissue	fat	abdominal_wall	NS	liposarcoma	dedifferentiated	NS	NS
SARC	soft_tissue	fat	abdominal_wall	NS	liposarcoma	myxoid-round_cell	NS	NS
SARC	soft_tissue	fat	abdominal_wall	NS	liposarcoma	NS	NS	NS
SARC	soft_tissue	fat	abdominal_wall	NS	liposarcoma	well_differentiated	NS	NS
SARC	soft_tissue	fat	arm	NS	liposarcoma	pleomorphic	NS	NS
SARC	soft_tissue	fat	axilla	NS	liposarcoma	myxoid-round_cell	NS	NS
SARC	soft_tissue	fat	axilla	NS	liposarcoma	well_differentiated	NS	NS
SARC	soft_tissue	fat	buttock	NS	liposarcoma	dedifferentiated	NS	NS
SARC	soft_tissue	fat	buttock	NS	liposarcoma	myxoid-round_cell	NS	NS
SARC	soft_tissue	fat	buttock	NS	liposarcoma	pleomorphic	NS	NS
SARC	soft_tissue	fat	buttock	NS	liposarcoma	well_differentiated	NS	NS
SARC	soft_tissue	fat	chest	NS	liposarcoma	dedifferentiated	NS	NS
SARC	soft_tissue	fat	chest	NS	liposarcoma	myxoid-round_cell	NS	NS
SARC	soft_tissue	fat	chest	NS	liposarcoma	NS	NS	NS
SARC	soft_tissue	fat	chest_wall	NS	liposarcoma	NS	NS	NS
SARC	soft_tissue	fat	extremity	NS	liposarcoma	dedifferentiated	NS	NS
SARC	soft_tissue	fat	extremity	NS	liposarcoma	myxoid-round_cell	NS	NS
SARC	soft_tissue	fat	extremity	NS	liposarcoma	pleomorphic	NS	NS
SARC	soft_tissue	fat	flank	NS	liposarcoma	myxoid-round_cell	NS	NS
SARC	soft_tissue	fat	foot	NS	liposarcoma	myxoid-round_cell	NS	NS
SARC	soft_tissue	fat	forearm	NS	liposarcoma	pleomorphic	NS	NS
SARC	soft_tissue	fat	groin	NS	liposarcoma	dedifferentiated	NS	NS
SARC	soft_tissue	fat	groin	NS	liposarcoma	myxoid-round_cell	NS	NS
SARC	soft_tissue	fat	groin	NS	liposarcoma	NS	NS	NS
SARC	soft_tissue	fat	groin	NS	liposarcoma	well_differentiated	NS	NS
SARC	soft_tissue	fat	head_neck	NS	liposarcoma	myxoid-round_cell	NS	NS
SARC	soft_tissue	fat	hip	NS	liposarcoma	dedifferentiated	NS	NS
SARC	soft_tissue	fat	intraabdominal	NS	liposarcoma	myxoid-round_cell	NS	NS
SARC	soft_tissue	fat	kidney	NS	liposarcoma	dedifferentiated	NS	NS
SARC	soft_tissue	fat	kidney	NS	liposarcoma	myxoid-round_cell	NS	NS
SARC	soft_tissue	fat	kidney	NS	liposarcoma	pleomorphic	NS	NS
SARC	soft_tissue	fat	knee	NS	liposarcoma	myxoid-round_cell	NS	NS
SARC	soft_tissue	fat	knee	NS	liposarcoma	NS	NS	NS
SARC	soft_tissue	fat	large_intestine	NS	liposarcoma	dedifferentiated	NS	NS
SARC	soft_tissue	fat	leg	NS	liposarcoma	myxoid-round_cell	NS	NS
SARC	soft_tissue	fat	leg	NS	liposarcoma	NS	NS	NS
SARC	soft_tissue	fat	liver	NS	liposarcoma	dedifferentiated	NS	NS
SARC	soft_tissue	fat	lower_extremity	NS	liposarcoma	dedifferentiated	NS	NS
SARC	soft_tissue	fat	lower_extremity	NS	liposarcoma	myxoid-round_cell	NS	NS
SARC	soft_tissue	fat	lower_extremity	NS	liposarcoma	pleomorphic	NS	NS
SARC	soft_tissue	fat	lower_leg	NS	liposarcoma	dedifferentiated	NS	NS
SARC	soft_tissue	fat	lower_leg	NS	liposarcoma	myxoid-round_cell	NS	NS
SARC	soft_tissue	fat	lower_leg	NS	liposarcoma	NS	NS	NS
SARC	soft_tissue	fat	mediastinum	NS	liposarcoma	dedifferentiated	NS	NS
SARC	soft_tissue	fat	mediastinum	NS	liposarcoma	mixed	NS	NS
SARC	soft_tissue	fat	mediastinum	NS	liposarcoma	NS	NS	NS
SARC	soft_tissue	fat	mediastinum	NS	liposarcoma	well_differentiated	NS	NS
SARC	soft_tissue	fat	mesentery	NS	liposarcoma	dedifferentiated	NS	NS
SARC	soft_tissue	fat	mesentery	NS	liposarcoma	myxoid-round_cell	NS	NS
SARC	soft_tissue	fat	mouth	NS	liposarcoma	myxoid-round_cell	NS	NS
SARC	soft_tissue	fat	neck	NS	liposarcoma	myxoid-round_cell	NS	NS
SARC	soft_tissue	fat	NS	NS	liposarcoma	dedifferentiated	NS	NS
SARC	soft_tissue	fat	NS	NS	liposarcoma	mixed	NS	NS
SARC	soft_tissue	fat	NS	NS	liposarcoma	myxoid-round_cell	NS	NS
SARC	soft_tissue	fat	NS	NS	liposarcoma	NS	NS	NS
SARC	soft_tissue	fat	NS	NS	liposarcoma	pleomorphic	NS	NS
SARC	soft_tissue	fat	NS	NS	liposarcoma	well_differentiated	NS	NS
SARC	soft_tissue	fat	pelvic_cavity	NS	liposarcoma	myxoid-round_cell	NS	NS
SARC	soft_tissue	fat	pelvis	NS	liposarcoma	dedifferentiated	NS	NS
SARC	soft_tissue	fat	pelvis	NS	liposarcoma	myxoid-round_cell	NS	NS
SARC	soft_tissue	fat	pelvis	NS	liposarcoma	NS	NS	NS
SARC	soft_tissue	fat	peritoneum	NS	liposarcoma	dedifferentiated	NS	NS
SARC	soft_tissue	fat	retroperitoneum	NS	liposarcoma	dedifferentiated	NS	NS
SARC	soft_tissue	fat	retroperitoneum	NS	liposarcoma	myxoid-round_cell	NS	NS
SARC	soft_tissue	fat	retroperitoneum	NS	liposarcoma	NS	NS	NS
SARC	soft_tissue	fat	retroperitoneum	NS	liposarcoma	pleomorphic	NS	NS
SARC	soft_tissue	fat	retroperitoneum	NS	liposarcoma	well_differentiated	NS	NS
SARC	soft_tissue	fat	scrotum	NS	liposarcoma	dedifferentiated	NS	NS
SARC	soft_tissue	fat	scrotum	NS	liposarcoma	well_differentiated	NS	NS
SARC	soft_tissue	fat	shoulder	NS	liposarcoma	myxoid-round_cell	NS	NS
SARC	soft_tissue	fat	shoulder	NS	liposarcoma	pleomorphic	NS	NS
SARC	soft_tissue	fat	small_intestine	NS	liposarcoma	dedifferentiated	NS	NS
SARC	soft_tissue	fat	spermatic_cord	NS	liposarcoma	well_differentiated	NS	NS
SARC	soft_tissue	fat	spine	NS	liposarcoma	myxoid-round_cell	NS	NS
SARC	soft_tissue	fat	trunk	NS	liposarcoma	myxoid-round_cell	NS	NS
SARC	soft_tissue	fat	upper_arm	NS	liposarcoma	myxoid-round_cell	NS	NS
SARC	soft_tissue	fat	upper_arm	NS	liposarcoma	pleomorphic	NS	NS
SARC	soft_tissue	fat	upper_leg	NS	liposarcoma	dedifferentiated	NS	NS
SARC	soft_tissue	fat	upper_leg	NS	liposarcoma	mixed	NS	NS
SARC	soft_tissue	fat	upper_leg	NS	liposarcoma	myxoid-round_cell	NS	NS
SARC	soft_tissue	fat	upper_leg	NS	liposarcoma	NS	NS	NS
SARC	soft_tissue	fat	upper_leg	NS	liposarcoma	pleomorphic	NS	NS
SARC	soft_tissue	fat	upper_leg	NS	liposarcoma	well_differentiated	NS	NS
SARC	soft_tissue	fibrous_tissue_and_uncertain_origin	abdomen	NS	congenital_(infantile)_fibrosarcoma	NS	NS	NS
SARC	soft_tissue	fibrous_tissue_and_uncertain_origin	abdomen	NS	dermatofibrosarcoma_protuberans	NS	NS	NS
SARC	soft_tissue	fibrous_tissue_and_uncertain_origin	abdomen	NS	endometrial_stromal_sarcoma	NS	NS	NS
SARC	soft_tissue	fibrous_tissue_and_uncertain_origin	abdomen	NS	fibrosarcoma	myxofibrosarcoma	NS	NS
SARC	soft_tissue	fibrous_tissue_and_uncertain_origin	abdomen	NS	low_grade_myofibroblastic_sarcoma	NS	NS	NS
SARC	soft_tissue	fibrous_tissue_and_uncertain_origin	abdomen	NS	malignant_fibrous_histiocytoma-pleomorphic_sarcoma	NS	NS	NS
SARC	soft_tissue	fibrous_tissue_and_uncertain_origin	abdomen	NS	malignant_melanoma_of_soft_parts-clear_cell_sarcoma	NS	NS	NS
SARC	soft_tissue	fibrous_tissue_and_uncertain_origin	abdomen	NS	sarcoma	NS	NS	NS
SARC	soft_tissue	fibrous_tissue_and_uncertain_origin	abdomen	NS	synovial_sarcoma	monophasic	NS	NS
SARC	soft_tissue	fibrous_tissue_and_uncertain_origin	abdominal_wall	NS	alveolar_soft_part_sarcoma	NS	NS	NS
SARC	soft_tissue	fibrous_tissue_and_uncertain_origin	abdominal_wall	NS	dermatofibrosarcoma_protuberans	NS	NS	NS
SARC	soft_tissue	fibrous_tissue_and_uncertain_origin	abdominal_wall	NS	fibrosarcoma	myxofibrosarcoma	NS	NS
SARC	soft_tissue	fibrous_tissue_and_uncertain_origin	abdominal_wall	NS	fibrosarcoma	NS	NS	NS
SARC	soft_tissue	fibrous_tissue_and_uncertain_origin	abdominal_wall	NS	malignant_fibrous_histiocytoma-pleomorphic_sarcoma	NS	NS	NS
SARC	soft_tissue	fibrous_tissue_and_uncertain_origin	abdominal_wall	NS	malignant_fibrous_histiocytoma-pleomorphic_sarcoma	storiform_pleomorphic	NS	NS
SARC	soft_tissue	fibrous_tissue_and_uncertain_origin	abdominal_wall	NS	malignant_melanoma_of_soft_parts-clear_cell_sarcoma	NS	NS	NS
SARC	soft_tissue	fibrous_tissue_and_uncertain_origin	abdominal_wall	NS	synovial_sarcoma	monophasic	NS	NS
SARC	soft_tissue	fibrous_tissue_and_uncertain_origin	abdominal_wall	NS	synovial_sarcoma	NS	NS	NS
SARC	soft_tissue	fibrous_tissue_and_uncertain_origin	abdominopelvic	NS	synovial_sarcoma	monophasic	NS	NS
SARC	soft_tissue	fibrous_tissue_and_uncertain_origin	Achilles_tendon	NS	malignant_melanoma_of_soft_parts-clear_cell_sarcoma	NS	NS	NS
SARC	soft_tissue	fibrous_tissue_and_uncertain_origin	ankle	NS	congenital_(infantile)_fibrosarcoma	NS	NS	NS
SARC	soft_tissue	fibrous_tissue_and_uncertain_origin	ankle	NS	malignant_melanoma_of_soft_parts-clear_cell_sarcoma	NS	NS	NS
SARC	soft_tissue	fibrous_tissue_and_uncertain_origin	ankle	NS	synovial_sarcoma	monophasic	NS	NS
SARC	soft_tissue	fibrous_tissue_and_uncertain_origin	arm	NS	alveolar_soft_part_sarcoma	NS	NS	NS
SARC	soft_tissue	fibrous_tissue_and_uncertain_origin	arm	NS	dermatofibrosarcoma_protuberans	NS	NS	NS
SARC	soft_tissue	fibrous_tissue_and_uncertain_origin	arm	NS	fibrosarcoma	myxofibrosarcoma	NS	NS
SARC	soft_tissue	fibrous_tissue_and_uncertain_origin	arm	NS	malignant_fibrous_histiocytoma-pleomorphic_sarcoma	NS	NS	NS
SARC	soft_tissue	fibrous_tissue_and_uncertain_origin	arm	NS	malignant_melanoma_of_soft_parts-clear_cell_sarcoma	NS	NS	NS
SARC	soft_tissue	fibrous_tissue_and_uncertain_origin	arm	NS	sclerosing_epithelioid_fibrosarcoma	NS	NS	NS
SARC	soft_tissue	fibrous_tissue_and_uncertain_origin	arm	NS	synovial_sarcoma	biphasic	NS	NS
SARC	soft_tissue	fibrous_tissue_and_uncertain_origin	arm	NS	synovial_sarcoma	monophasic	NS	NS
SARC	soft_tissue	fibrous_tissue_and_uncertain_origin	arm	NS	synovial_sarcoma	NS	NS	NS
SARC	soft_tissue	fibrous_tissue_and_uncertain_origin	axilla	NS	alveolar_soft_part_sarcoma	NS	NS	NS
SARC	soft_tissue	fibrous_tissue_and_uncertain_origin	axilla	NS	dermatofibrosarcoma_protuberans	NS	NS	NS
SARC	soft_tissue	fibrous_tissue_and_uncertain_origin	axilla	NS	fibrosarcoma	myxofibrosarcoma	NS	NS
SARC	soft_tissue	fibrous_tissue_and_uncertain_origin	axilla	NS	malignant_fibrous_histiocytoma-pleomorphic_sarcoma	NS	NS	NS
SARC	soft_tissue	fibrous_tissue_and_uncertain_origin	axilla	NS	malignant_melanoma_of_soft_parts-clear_cell_sarcoma	NS	NS	NS
SARC	soft_tissue	fibrous_tissue_and_uncertain_origin	axilla	NS	synovial_sarcoma	monophasic	NS	NS
SARC	soft_tissue	fibrous_tissue_and_uncertain_origin	axilla	NS	synovial_sarcoma	NS	NS	NS
SARC	soft_tissue	fibrous_tissue_and_uncertain_origin	axilla	NS	synovial_sarcoma	poorly_differentiated	NS	NS
SARC	soft_tissue	fibrous_tissue_and_uncertain_origin	back	NS	congenital_(infantile)_fibrosarcoma	NS	NS	NS
SARC	soft_tissue	fibrous_tissue_and_uncertain_origin	back	NS	dermatofibrosarcoma_protuberans	NS	NS	NS
SARC	soft_tissue	fibrous_tissue_and_uncertain_origin	back	NS	fibrosarcoma	myxofibrosarcoma	NS	NS
SARC	soft_tissue	fibrous_tissue_and_uncertain_origin	back	NS	fibrosarcoma	NS	NS	NS
SARC	soft_tissue	fibrous_tissue_and_uncertain_origin	back	NS	malignant_fibrous_histiocytoma-pleomorphic_sarcoma	NS	NS	NS
SARC	soft_tissue	fibrous_tissue_and_uncertain_origin	back	NS	malignant_melanoma_of_soft_parts-clear_cell_sarcoma	NS	NS	NS
SARC	soft_tissue	fibrous_tissue_and_uncertain_origin	back	NS	sarcoma	spindle	NS	NS
SARC	soft_tissue	fibrous_tissue_and_uncertain_origin	back	NS	sclerosing_epithelioid_fibrosarcoma	NS	NS	NS
SARC	soft_tissue	fibrous_tissue_and_uncertain_origin	back	NS	synovial_sarcoma	biphasic	NS	NS
SARC	soft_tissue	fibrous_tissue_and_uncertain_origin	back	NS	synovial_sarcoma	monophasic	NS	NS
SARC	soft_tissue	fibrous_tissue_and_uncertain_origin	bone	NS	synovial_sarcoma	NS	NS	NS
SARC	soft_tissue	fibrous_tissue_and_uncertain_origin	brachial_plexus	NS	fibrosarcoma	myxofibrosarcoma	NS	NS
SARC	soft_tissue	fibrous_tissue_and_uncertain_origin	breast	NS	alveolar_soft_part_sarcoma	NS	NS	NS
SARC	soft_tissue	fibrous_tissue_and_uncertain_origin	breast	NS	dermatofibrosarcoma_protuberans	NS	NS	NS
SARC	soft_tissue	fibrous_tissue_and_uncertain_origin	breast	NS	malignant_melanoma_of_soft_parts-clear_cell_sarcoma	NS	NS	NS
SARC	soft_tissue	fibrous_tissue_and_uncertain_origin	breast	NS	sarcoma	NS	NS	NS
SARC	soft_tissue	fibrous_tissue_and_uncertain_origin	breast	NS	sarcoma	spindle	NS	NS
SARC	soft_tissue	fibrous_tissue_and_uncertain_origin	buttock	NS	alveolar_soft_part_sarcoma	NS	NS	NS
SARC	soft_tissue	fibrous_tissue_and_uncertain_origin	buttock	NS	congenital_(infantile)_fibrosarcoma	NS	NS	NS
SARC	soft_tissue	fibrous_tissue_and_uncertain_origin	buttock	NS	dermatofibrosarcoma_protuberans	NS	NS	NS
SARC	soft_tissue	fibrous_tissue_and_uncertain_origin	buttock	NS	fibrosarcoma	myxofibrosarcoma	NS	NS
SARC	soft_tissue	fibrous_tissue_and_uncertain_origin	buttock	NS	malignant_fibrous_histiocytoma-pleomorphic_sarcoma	myxoid	NS	NS
SARC	soft_tissue	fibrous_tissue_and_uncertain_origin	buttock	NS	malignant_fibrous_histiocytoma-pleomorphic_sarcoma	NS	NS	NS
SARC	soft_tissue	fibrous_tissue_and_uncertain_origin	buttock	NS	malignant_fibrous_histiocytoma-pleomorphic_sarcoma	storiform_pleomorphic	NS	NS
SARC	soft_tissue	fibrous_tissue_and_uncertain_origin	buttock	NS	malignant_melanoma_of_soft_parts-clear_cell_sarcoma	NS	NS	NS
SARC	soft_tissue	fibrous_tissue_and_uncertain_origin	buttock	NS	sarcoma	NS	NS	NS
SARC	soft_tissue	fibrous_tissue_and_uncertain_origin	buttock	NS	sclerosing_epithelioid_fibrosarcoma	NS	NS	NS
SARC	soft_tissue	fibrous_tissue_and_uncertain_origin	buttock	NS	synovial_sarcoma	biphasic	NS	NS
SARC	soft_tissue	fibrous_tissue_and_uncertain_origin	buttock	NS	synovial_sarcoma	monophasic	NS	NS
SARC	soft_tissue	fibrous_tissue_and_uncertain_origin	buttock	NS	synovial_sarcoma	NS	NS	NS
SARC	soft_tissue	fibrous_tissue_and_uncertain_origin	calf	NS	alveolar_soft_part_sarcoma	NS	NS	NS
SARC	soft_tissue	fibrous_tissue_and_uncertain_origin	cheek	NS	dermatofibrosarcoma_protuberans	NS	NS	NS
SARC	soft_tissue	fibrous_tissue_and_uncertain_origin	cheek	NS	fibrosarcoma	NS	NS	NS
SARC	soft_tissue	fibrous_tissue_and_uncertain_origin	cheek	NS	synovial_sarcoma	monophasic	NS	NS
SARC	soft_tissue	fibrous_tissue_and_uncertain_origin	chest	NS	dermatofibrosarcoma_protuberans	NS	NS	NS
SARC	soft_tissue	fibrous_tissue_and_uncertain_origin	chest	NS	fibrosarcoma	myxofibrosarcoma	NS	NS
SARC	soft_tissue	fibrous_tissue_and_uncertain_origin	chest	NS	malignant_fibrous_histiocytoma-pleomorphic_sarcoma	NS	NS	NS
SARC	soft_tissue	fibrous_tissue_and_uncertain_origin	chest	NS	malignant_melanoma_of_soft_parts-clear_cell_sarcoma	NS	NS	NS
SARC	soft_tissue	fibrous_tissue_and_uncertain_origin	chest	NS	synovial_sarcoma	biphasic	NS	NS
SARC	soft_tissue	fibrous_tissue_and_uncertain_origin	chest	NS	synovial_sarcoma	monophasic	NS	NS
SARC	soft_tissue	fibrous_tissue_and_uncertain_origin	chest	NS	synovial_sarcoma	NS	NS	NS
SARC	soft_tissue	fibrous_tissue_and_uncertain_origin	chest_wall	NS	alveolar_soft_part_sarcoma	NS	NS	NS
SARC	soft_tissue	fibrous_tissue_and_uncertain_origin	chest_wall	NS	dermatofibrosarcoma_protuberans	NS	NS	NS
SARC	soft_tissue	fibrous_tissue_and_uncertain_origin	chest_wall	NS	fibrosarcoma	myxofibrosarcoma	NS	NS
SARC	soft_tissue	fibrous_tissue_and_uncertain_origin	chest_wall	NS	fibrosarcoma	NS	NS	NS
SARC	soft_tissue	fibrous_tissue_and_uncertain_origin	chest_wall	NS	malignant_fibrous_histiocytoma-pleomorphic_sarcoma	giant_cell	NS	NS
SARC	soft_tissue	fibrous_tissue_and_uncertain_origin	chest_wall	NS	malignant_fibrous_histiocytoma-pleomorphic_sarcoma	myxoid	NS	NS
SARC	soft_tissue	fibrous_tissue_and_uncertain_origin	chest_wall	NS	malignant_fibrous_histiocytoma-pleomorphic_sarcoma	NS	NS	NS
SARC	soft_tissue	fibrous_tissue_and_uncertain_origin	chest_wall	NS	malignant_fibrous_histiocytoma-pleomorphic_sarcoma	storiform_pleomorphic	NS	NS
SARC	soft_tissue	fibrous_tissue_and_uncertain_origin	chest_wall	NS	malignant_melanoma_of_soft_parts-clear_cell_sarcoma	NS	NS	NS
SARC	soft_tissue	fibrous_tissue_and_uncertain_origin	chest_wall	NS	sarcoma	spindle	NS	NS
SARC	soft_tissue	fibrous_tissue_and_uncertain_origin	chest_wall	NS	synovial_sarcoma	biphasic	NS	NS
SARC	soft_tissue	fibrous_tissue_and_uncertain_origin	chest_wall	NS	synovial_sarcoma	monophasic	NS	NS
SARC	soft_tissue	fibrous_tissue_and_uncertain_origin	chest_wall	NS	synovial_sarcoma	NS	NS	NS
SARC	soft_tissue	fibrous_tissue_and_uncertain_origin	distal	NS	epithelioid_sarcoma	NS	NS	NS
SARC	soft_tissue	fibrous_tissue_and_uncertain_origin	ear	NS	dermatofibrosarcoma_protuberans	NS	NS	NS
SARC	soft_tissue	fibrous_tissue_and_uncertain_origin	ear	NS	malignant_fibrous_histiocytoma-pleomorphic_sarcoma	storiform_pleomorphic	NS	NS
SARC	soft_tissue	fibrous_tissue_and_uncertain_origin	elbow	NS	alveolar_soft_part_sarcoma	NS	NS	NS
SARC	soft_tissue	fibrous_tissue_and_uncertain_origin	elbow	NS	dermatofibrosarcoma_protuberans	NS	NS	NS
SARC	soft_tissue	fibrous_tissue_and_uncertain_origin	elbow	NS	fibrosarcoma	myxofibrosarcoma	NS	NS
SARC	soft_tissue	fibrous_tissue_and_uncertain_origin	elbow	NS	malignant_fibrous_histiocytoma-pleomorphic_sarcoma	giant_cell	NS	NS
SARC	soft_tissue	fibrous_tissue_and_uncertain_origin	elbow	NS	malignant_melanoma_of_soft_parts-clear_cell_sarcoma	NS	NS	NS
SARC	soft_tissue	fibrous_tissue_and_uncertain_origin	elbow	NS	synovial_sarcoma	biphasic	NS	NS
SARC	soft_tissue	fibrous_tissue_and_uncertain_origin	elbow	NS	synovial_sarcoma	monophasic	NS	NS
SARC	soft_tissue	fibrous_tissue_and_uncertain_origin	elbow	NS	synovial_sarcoma	NS	NS	NS
SARC	soft_tissue	fibrous_tissue_and_uncertain_origin	endometrium	NS	endometrial_stromal_sarcoma	NS	NS	NS
SARC	soft_tissue	fibrous_tissue_and_uncertain_origin	endometrium	NS	sarcoma	NS	NS	NS
SARC	soft_tissue	fibrous_tissue_and_uncertain_origin	extrauterine	NS	endometrial_stromal_sarcoma	NS	NS	NS
SARC	soft_tissue	fibrous_tissue_and_uncertain_origin	face	NS	dermatofibrosarcoma_protuberans	NS	NS	NS
SARC	soft_tissue	fibrous_tissue_and_uncertain_origin	face	NS	malignant_melanoma_of_soft_parts-clear_cell_sarcoma	NS	NS	NS
SARC	soft_tissue	fibrous_tissue_and_uncertain_origin	face	NS	synovial_sarcoma	biphasic	NS	NS
SARC	soft_tissue	fibrous_tissue_and_uncertain_origin	face	NS	synovial_sarcoma	monophasic	NS	NS
SARC	soft_tissue	fibrous_tissue_and_uncertain_origin	Fallopian_tube	NS	synovial_sarcoma	biphasic	NS	NS
SARC	soft_tissue	fibrous_tissue_and_uncertain_origin	fetal_paraspinal	NS	congenital_(infantile)_fibrosarcoma	NS	NS	NS
SARC	soft_tissue	fibrous_tissue_and_uncertain_origin	fibula	NS	alveolar_soft_part_sarcoma	NS	NS	NS
SARC	soft_tissue	fibrous_tissue_and_uncertain_origin	flank	NS	congenital_(infantile)_fibrosarcoma	NS	NS	NS
SARC	soft_tissue	fibrous_tissue_and_uncertain_origin	flank	NS	dermatofibrosarcoma_protuberans	NS	NS	NS
SARC	soft_tissue	fibrous_tissue_and_uncertain_origin	foot	NS	alveolar_soft_part_sarcoma	NS	NS	NS
SARC	soft_tissue	fibrous_tissue_and_uncertain_origin	foot	NS	dermatofibrosarcoma_protuberans	NS	NS	NS
SARC	soft_tissue	fibrous_tissue_and_uncertain_origin	foot	NS	fibrosarcoma	myxofibrosarcoma	NS	NS
SARC	soft_tissue	fibrous_tissue_and_uncertain_origin	foot	NS	malignant_fibrous_histiocytoma-pleomorphic_sarcoma	NS	NS	NS
SARC	soft_tissue	fibrous_tissue_and_uncertain_origin	foot	NS	malignant_melanoma_of_soft_parts-clear_cell_sarcoma	NS	NS	NS
SARC	soft_tissue	fibrous_tissue_and_uncertain_origin	foot	NS	synovial_sarcoma	biphasic	NS	NS
SARC	soft_tissue	fibrous_tissue_and_uncertain_origin	foot	NS	synovial_sarcoma	monophasic	NS	NS
SARC	soft_tissue	fibrous_tissue_and_uncertain_origin	foot	NS	synovial_sarcoma	NS	NS	NS
SARC	soft_tissue	fibrous_tissue_and_uncertain_origin	forearm	NS	alveolar_soft_part_sarcoma	NS	NS	NS
SARC	soft_tissue	fibrous_tissue_and_uncertain_origin	forearm	NS	congenital_(infantile)_fibrosarcoma	NS	NS	NS
SARC	soft_tissue	fibrous_tissue_and_uncertain_origin	forearm	NS	dermatofibrosarcoma_protuberans	NS	NS	NS
SARC	soft_tissue	fibrous_tissue_and_uncertain_origin	forearm	NS	epithelioid_sarcoma	NS	NS	NS
SARC	soft_tissue	fibrous_tissue_and_uncertain_origin	forearm	NS	fibrosarcoma	myxofibrosarcoma	NS	NS
SARC	soft_tissue	fibrous_tissue_and_uncertain_origin	forearm	NS	malignant_fibrous_histiocytoma-pleomorphic_sarcoma	NS	NS	NS
SARC	soft_tissue	fibrous_tissue_and_uncertain_origin	forearm	NS	malignant_fibrous_histiocytoma-pleomorphic_sarcoma	storiform_pleomorphic	NS	NS
SARC	soft_tissue	fibrous_tissue_and_uncertain_origin	forearm	NS	malignant_melanoma_of_soft_parts-clear_cell_sarcoma	NS	NS	NS
SARC	soft_tissue	fibrous_tissue_and_uncertain_origin	forearm	NS	synovial_sarcoma	biphasic	NS	NS
SARC	soft_tissue	fibrous_tissue_and_uncertain_origin	forearm	NS	synovial_sarcoma	monophasic	NS	NS
SARC	soft_tissue	fibrous_tissue_and_uncertain_origin	forearm	NS	synovial_sarcoma	NS	NS	NS
SARC	soft_tissue	fibrous_tissue_and_uncertain_origin	forearm	NS	synovial_sarcoma	poorly_differentiated	NS	NS
SARC	soft_tissue	fibrous_tissue_and_uncertain_origin	forehead	NS	dermatofibrosarcoma_protuberans	NS	NS	NS
SARC	soft_tissue	fibrous_tissue_and_uncertain_origin	groin	NS	dermatofibrosarcoma_protuberans	NS	NS	NS
SARC	soft_tissue	fibrous_tissue_and_uncertain_origin	groin	NS	fibrosarcoma	NS	NS	NS
SARC	soft_tissue	fibrous_tissue_and_uncertain_origin	groin	NS	malignant_fibrous_histiocytoma-pleomorphic_sarcoma	NS	NS	NS
SARC	soft_tissue	fibrous_tissue_and_uncertain_origin	groin	NS	malignant_fibrous_histiocytoma-pleomorphic_sarcoma	storiform_pleomorphic	NS	NS
SARC	soft_tissue	fibrous_tissue_and_uncertain_origin	groin	NS	malignant_melanoma_of_soft_parts-clear_cell_sarcoma	NS	NS	NS
SARC	soft_tissue	fibrous_tissue_and_uncertain_origin	groin	NS	synovial_sarcoma	biphasic	NS	NS
SARC	soft_tissue	fibrous_tissue_and_uncertain_origin	groin	NS	synovial_sarcoma	monophasic	NS	NS
SARC	soft_tissue	fibrous_tissue_and_uncertain_origin	groin	NS	synovial_sarcoma	NS	NS	NS
SARC	soft_tissue	fibrous_tissue_and_uncertain_origin	hand	NS	alveolar_soft_part_sarcoma	NS	NS	NS
SARC	soft_tissue	fibrous_tissue_and_uncertain_origin	hand	NS	congenital_(infantile)_fibrosarcoma	NS	NS	NS
SARC	soft_tissue	fibrous_tissue_and_uncertain_origin	hand	NS	dermatofibrosarcoma_protuberans	NS	NS	NS
SARC	soft_tissue	fibrous_tissue_and_uncertain_origin	hand	NS	epithelioid_sarcoma	NS	NS	NS
SARC	soft_tissue	fibrous_tissue_and_uncertain_origin	hand	NS	fibrosarcoma	myxofibrosarcoma	NS	NS
SARC	soft_tissue	fibrous_tissue_and_uncertain_origin	hand	NS	malignant_melanoma_of_soft_parts-clear_cell_sarcoma	NS	NS	NS
SARC	soft_tissue	fibrous_tissue_and_uncertain_origin	hand	NS	synovial_sarcoma	biphasic	NS	NS
SARC	soft_tissue	fibrous_tissue_and_uncertain_origin	hand	NS	synovial_sarcoma	NS	NS	NS
SARC	soft_tissue	fibrous_tissue_and_uncertain_origin	hand	NS	synovial_sarcoma	poorly_differentiated	NS	NS
SARC	soft_tissue	fibrous_tissue_and_uncertain_origin	head_neck	NS	dermatofibrosarcoma_protuberans	NS	NS	NS
SARC	soft_tissue	fibrous_tissue_and_uncertain_origin	head_neck	NS	fibrosarcoma	myxofibrosarcoma	NS	NS
SARC	soft_tissue	fibrous_tissue_and_uncertain_origin	head_neck	NS	malignant_fibrous_histiocytoma-pleomorphic_sarcoma	NS	NS	NS
SARC	soft_tissue	fibrous_tissue_and_uncertain_origin	head_neck	NS	synovial_sarcoma	biphasic	NS	NS
SARC	soft_tissue	fibrous_tissue_and_uncertain_origin	head	NS	dermatofibrosarcoma_protuberans	NS	NS	NS
SARC	soft_tissue	fibrous_tissue_and_uncertain_origin	heart	NS	alveolar_soft_part_sarcoma	NS	NS	NS
SARC	soft_tissue	fibrous_tissue_and_uncertain_origin	heart	NS	synovial_sarcoma	monophasic	NS	NS
SARC	soft_tissue	fibrous_tissue_and_uncertain_origin	hip	NS	fibrosarcoma	myxofibrosarcoma	NS	NS
SARC	soft_tissue	fibrous_tissue_and_uncertain_origin	hip	NS	malignant_fibrous_histiocytoma-pleomorphic_sarcoma	NS	NS	NS
SARC	soft_tissue	fibrous_tissue_and_uncertain_origin	hip	NS	malignant_melanoma_of_soft_parts-clear_cell_sarcoma	NS	NS	NS
SARC	soft_tissue	fibrous_tissue_and_uncertain_origin	hip	NS	synovial_sarcoma	biphasic	NS	NS
SARC	soft_tissue	fibrous_tissue_and_uncertain_origin	hip	NS	synovial_sarcoma	monophasic	NS	NS
SARC	soft_tissue	fibrous_tissue_and_uncertain_origin	jaw	NS	congenital_(infantile)_fibrosarcoma	NS	NS	NS
SARC	soft_tissue	fibrous_tissue_and_uncertain_origin	kidney	NS	alveolar_soft_part_sarcoma	NS	NS	NS
SARC	soft_tissue	fibrous_tissue_and_uncertain_origin	kidney	NS	malignant_melanoma_of_soft_parts-clear_cell_sarcoma	NS	NS	NS
SARC	soft_tissue	fibrous_tissue_and_uncertain_origin	kidney	NS	sarcoma	NS	NS	NS
SARC	soft_tissue	fibrous_tissue_and_uncertain_origin	kidney	NS	synovial_sarcoma	biphasic	NS	NS
SARC	soft_tissue	fibrous_tissue_and_uncertain_origin	kidney	NS	synovial_sarcoma	monophasic	NS	NS
SARC	soft_tissue	fibrous_tissue_and_uncertain_origin	kidney	NS	synovial_sarcoma	NS	NS	NS
SARC	soft_tissue	fibrous_tissue_and_uncertain_origin	kidney	NS	synovial_sarcoma	poorly_differentiated	NS	NS
SARC	soft_tissue	fibrous_tissue_and_uncertain_origin	knee	NS	alveolar_soft_part_sarcoma	NS	NS	NS
SARC	soft_tissue	fibrous_tissue_and_uncertain_origin	knee	NS	fibrosarcoma	myxofibrosarcoma	NS	NS
SARC	soft_tissue	fibrous_tissue_and_uncertain_origin	knee	NS	malignant_fibrous_histiocytoma-pleomorphic_sarcoma	NS	NS	NS
SARC	soft_tissue	fibrous_tissue_and_uncertain_origin	knee	NS	malignant_melanoma_of_soft_parts-clear_cell_sarcoma	NS	NS	NS
SARC	soft_tissue	fibrous_tissue_and_uncertain_origin	knee	NS	synovial_sarcoma	biphasic	NS	NS
SARC	soft_tissue	fibrous_tissue_and_uncertain_origin	knee	NS	synovial_sarcoma	monophasic	NS	NS
SARC	soft_tissue	fibrous_tissue_and_uncertain_origin	knee	NS	synovial_sarcoma	NS	NS	NS
SARC	soft_tissue	fibrous_tissue_and_uncertain_origin	large_intestine	NS	malignant_melanoma_of_soft_parts-clear_cell_sarcoma	NS	NS	NS
SARC	soft_tissue	fibrous_tissue_and_uncertain_origin	large_intestine	NS	sarcoma	NS	NS	NS
SARC	soft_tissue	fibrous_tissue_and_uncertain_origin	leg	NS	dermatofibrosarcoma_protuberans	NS	NS	NS
SARC	soft_tissue	fibrous_tissue_and_uncertain_origin	leg	NS	fibrosarcoma	myxofibrosarcoma	NS	NS
SARC	soft_tissue	fibrous_tissue_and_uncertain_origin	leg	NS	malignant_fibrous_histiocytoma-pleomorphic_sarcoma	NS	NS	NS
SARC	soft_tissue	fibrous_tissue_and_uncertain_origin	leg	NS	malignant_melanoma_of_soft_parts-clear_cell_sarcoma	NS	NS	NS
SARC	soft_tissue	fibrous_tissue_and_uncertain_origin	leg	NS	synovial_sarcoma	biphasic	NS	NS
SARC	soft_tissue	fibrous_tissue_and_uncertain_origin	leg	NS	synovial_sarcoma	monophasic	NS	NS
SARC	soft_tissue	fibrous_tissue_and_uncertain_origin	leg	NS	synovial_sarcoma	NS	NS	NS
SARC	soft_tissue	fibrous_tissue_and_uncertain_origin	liver	NS	sarcoma	NS	NS	NS
SARC	soft_tissue	fibrous_tissue_and_uncertain_origin	lower_arm	NS	malignant_fibrous_histiocytoma-pleomorphic_sarcoma	NS	NS	NS
SARC	soft_tissue	fibrous_tissue_and_uncertain_origin	lower_arm	NS	synovial_sarcoma	NS	NS	NS
SARC	soft_tissue	fibrous_tissue_and_uncertain_origin	lower_back	NS	dermatofibrosarcoma_protuberans	NS	NS	NS
SARC	soft_tissue	fibrous_tissue_and_uncertain_origin	lower_back	NS	fibrosarcoma	myxofibrosarcoma	NS	NS
SARC	soft_tissue	fibrous_tissue_and_uncertain_origin	lower_extremity	NS	malignant_fibrous_histiocytoma-pleomorphic_sarcoma	NS	NS	NS
SARC	soft_tissue	fibrous_tissue_and_uncertain_origin	lower_leg	NS	alveolar_soft_part_sarcoma	NS	NS	NS
SARC	soft_tissue	fibrous_tissue_and_uncertain_origin	lower_leg	NS	congenital_(infantile)_fibrosarcoma	NS	NS	NS
SARC	soft_tissue	fibrous_tissue_and_uncertain_origin	lower_leg	NS	dermatofibrosarcoma_protuberans	NS	NS	NS
SARC	soft_tissue	fibrous_tissue_and_uncertain_origin	lower_leg	NS	fibrosarcoma	myxofibrosarcoma	NS	NS
SARC	soft_tissue	fibrous_tissue_and_uncertain_origin	lower_leg	NS	malignant_fibrous_histiocytoma-pleomorphic_sarcoma	myxoid	NS	NS
SARC	soft_tissue	fibrous_tissue_and_uncertain_origin	lower_leg	NS	malignant_fibrous_histiocytoma-pleomorphic_sarcoma	NS	NS	NS
SARC	soft_tissue	fibrous_tissue_and_uncertain_origin	lower_leg	NS	malignant_melanoma_of_soft_parts-clear_cell_sarcoma	NS	NS	NS
SARC	soft_tissue	fibrous_tissue_and_uncertain_origin	lower_leg	NS	synovial_sarcoma	biphasic	NS	NS
SARC	soft_tissue	fibrous_tissue_and_uncertain_origin	lower_leg	NS	synovial_sarcoma	monophasic	NS	NS
SARC	soft_tissue	fibrous_tissue_and_uncertain_origin	lower_leg	NS	synovial_sarcoma	NS	NS	NS
SARC	soft_tissue	fibrous_tissue_and_uncertain_origin	lower_leg	NS	synovial_sarcoma	poorly_differentiated	NS	NS
SARC	soft_tissue	fibrous_tissue_and_uncertain_origin	lung	NS	malignant_fibrous_histiocytoma-pleomorphic_sarcoma	NS	NS	NS
SARC	soft_tissue	fibrous_tissue_and_uncertain_origin	lung	NS	sarcoma	NS	NS	NS
SARC	soft_tissue	fibrous_tissue_and_uncertain_origin	lung	NS	sarcoma	spindle	NS	NS
SARC	soft_tissue	fibrous_tissue_and_uncertain_origin	lung	NS	synovial_sarcoma	biphasic	NS	NS
SARC	soft_tissue	fibrous_tissue_and_uncertain_origin	lung	NS	synovial_sarcoma	monophasic	NS	NS
SARC	soft_tissue	fibrous_tissue_and_uncertain_origin	lung	NS	synovial_sarcoma	NS	NS	NS
SARC	soft_tissue	fibrous_tissue_and_uncertain_origin	lung	NS	synovial_sarcoma	poorly_differentiated	NS	NS
SARC	soft_tissue	fibrous_tissue_and_uncertain_origin	lymph_node	NS	synovial_sarcoma	biphasic	NS	NS
SARC	soft_tissue	fibrous_tissue_and_uncertain_origin	mediastinum	NS	fibrosarcoma	NS	NS	NS
SARC	soft_tissue	fibrous_tissue_and_uncertain_origin	mediastinum	NS	malignant_fibrous_histiocytoma-pleomorphic_sarcoma	NS	NS	NS
SARC	soft_tissue	fibrous_tissue_and_uncertain_origin	mediastinum	NS	malignant_fibrous_histiocytoma-pleomorphic_sarcoma	storiform_pleomorphic	NS	NS
SARC	soft_tissue	fibrous_tissue_and_uncertain_origin	mediastinum	NS	synovial_sarcoma	biphasic	NS	NS
SARC	soft_tissue	fibrous_tissue_and_uncertain_origin	mediastinum	NS	synovial_sarcoma	monophasic	NS	NS
SARC	soft_tissue	fibrous_tissue_and_uncertain_origin	meninges	NS	alveolar_soft_part_sarcoma	NS	NS	NS
SARC	soft_tissue	fibrous_tissue_and_uncertain_origin	meninges	NS	fibrosarcoma	myxofibrosarcoma	NS	NS
SARC	soft_tissue	fibrous_tissue_and_uncertain_origin	mesentery	NS	malignant_fibrous_histiocytoma-pleomorphic_sarcoma	NS	NS	NS
SARC	soft_tissue	fibrous_tissue_and_uncertain_origin	mouth	NS	congenital_(infantile)_fibrosarcoma	NS	NS	NS
SARC	soft_tissue	fibrous_tissue_and_uncertain_origin	mouth	NS	malignant_fibrous_histiocytoma-pleomorphic_sarcoma	NS	NS	NS
SARC	soft_tissue	fibrous_tissue_and_uncertain_origin	mouth	NS	sarcoma	NS	NS	NS
SARC	soft_tissue	fibrous_tissue_and_uncertain_origin	mouth	NS	synovial_sarcoma	monophasic	NS	NS
SARC	soft_tissue	fibrous_tissue_and_uncertain_origin	muscle	NS	fibrosarcoma	NS	NS	NS
SARC	soft_tissue	fibrous_tissue_and_uncertain_origin	muscle	NS	synovial_sarcoma	biphasic	NS	NS
SARC	soft_tissue	fibrous_tissue_and_uncertain_origin	muscle	NS	synovial_sarcoma	monophasic	NS	NS
SARC	soft_tissue	fibrous_tissue_and_uncertain_origin	neck	NS	fibrosarcoma	myxofibrosarcoma	NS	NS
SARC	soft_tissue	fibrous_tissue_and_uncertain_origin	neck	NS	fibrosarcoma	NS	NS	NS
SARC	soft_tissue	fibrous_tissue_and_uncertain_origin	neck	NS	malignant_fibrous_histiocytoma-pleomorphic_sarcoma	giant_cell	NS	NS
SARC	soft_tissue	fibrous_tissue_and_uncertain_origin	neck	NS	malignant_fibrous_histiocytoma-pleomorphic_sarcoma	NS	NS	NS
SARC	soft_tissue	fibrous_tissue_and_uncertain_origin	neck	NS	malignant_melanoma_of_soft_parts-clear_cell_sarcoma	NS	NS	NS
SARC	soft_tissue	fibrous_tissue_and_uncertain_origin	neck	NS	sarcoma	NS	NS	NS
SARC	soft_tissue	fibrous_tissue_and_uncertain_origin	neck	NS	synovial_sarcoma	biphasic	NS	NS
SARC	soft_tissue	fibrous_tissue_and_uncertain_origin	neck	NS	synovial_sarcoma	monophasic	NS	NS
SARC	soft_tissue	fibrous_tissue_and_uncertain_origin	neck	NS	synovial_sarcoma	NS	NS	NS
SARC	soft_tissue	fibrous_tissue_and_uncertain_origin	neck	NS	synovial_sarcoma	poorly_differentiated	NS	NS
SARC	soft_tissue	fibrous_tissue_and_uncertain_origin	nerve	NS	synovial_sarcoma	monophasic	NS	NS
SARC	soft_tissue	fibrous_tissue_and_uncertain_origin	NS	NS	alveolar_soft_part_sarcoma	NS	NS	NS
SARC	soft_tissue	fibrous_tissue_and_uncertain_origin	NS	NS	congenital_(infantile)_fibrosarcoma	NS	NS	NS
SARC	soft_tissue	fibrous_tissue_and_uncertain_origin	NS	NS	dermatofibrosarcoma_protuberans	NS	NS	NS
SARC	soft_tissue	fibrous_tissue_and_uncertain_origin	NS	NS	epithelioid_sarcoma	NS	NS	NS
SARC	soft_tissue	fibrous_tissue_and_uncertain_origin	NS	NS	fibrosarcoma	myxofibrosarcoma	NS	NS
SARC	soft_tissue	fibrous_tissue_and_uncertain_origin	NS	NS	fibrosarcoma	NS	NS	NS
SARC	soft_tissue	fibrous_tissue_and_uncertain_origin	NS	NS	malignant_fibrous_histiocytoma-pleomorphic_sarcoma	mixed	NS	NS
SARC	soft_tissue	fibrous_tissue_and_uncertain_origin	NS	NS	malignant_fibrous_histiocytoma-pleomorphic_sarcoma	myxoid	NS	NS
SARC	soft_tissue	fibrous_tissue_and_uncertain_origin	NS	NS	malignant_fibrous_histiocytoma-pleomorphic_sarcoma	NS	NS	NS
SARC	soft_tissue	fibrous_tissue_and_uncertain_origin	NS	NS	malignant_fibrous_histiocytoma-pleomorphic_sarcoma	storiform_pleomorphic	NS	NS
SARC	soft_tissue	fibrous_tissue_and_uncertain_origin	NS	NS	malignant_melanoma_of_soft_parts-clear_cell_sarcoma	NS	NS	NS
SARC	soft_tissue	fibrous_tissue_and_uncertain_origin	NS	NS	myofibroblastic_sarcoma	NS	NS	NS
SARC	soft_tissue	fibrous_tissue_and_uncertain_origin	NS	NS	sarcoma	NS	NS	NS
SARC	soft_tissue	fibrous_tissue_and_uncertain_origin	NS	NS	sarcoma	spindle	NS	NS
SARC	soft_tissue	fibrous_tissue_and_uncertain_origin	NS	NS	sclerosing_epithelioid_fibrosarcoma	NS	NS	NS
SARC	soft_tissue	fibrous_tissue_and_uncertain_origin	NS	NS	synovial_sarcoma	biphasic	NS	NS
SARC	soft_tissue	fibrous_tissue_and_uncertain_origin	NS	NS	synovial_sarcoma	monophasic	NS	NS
SARC	soft_tissue	fibrous_tissue_and_uncertain_origin	NS	NS	synovial_sarcoma	NS	NS	NS
SARC	soft_tissue	fibrous_tissue_and_uncertain_origin	NS	NS	synovial_sarcoma	poorly_differentiated	NS	NS
SARC	soft_tissue	fibrous_tissue_and_uncertain_origin	omentum	NS	malignant_fibrous_histiocytoma-pleomorphic_sarcoma	storiform_pleomorphic	NS	NS
SARC	soft_tissue	fibrous_tissue_and_uncertain_origin	orbit	NS	alveolar_soft_part_sarcoma	NS	NS	NS
SARC	soft_tissue	fibrous_tissue_and_uncertain_origin	ovary	NS	endometrial_stromal_sarcoma	NS	NS	NS
SARC	soft_tissue	fibrous_tissue_and_uncertain_origin	ovary	NS	fibrosarcoma	NS	NS	NS
SARC	soft_tissue	fibrous_tissue_and_uncertain_origin	ovary	NS	sarcoma	NS	NS	NS
SARC	soft_tissue	fibrous_tissue_and_uncertain_origin	pancreas	NS	malignant_fibrous_histiocytoma-pleomorphic_sarcoma	NS	NS	NS
SARC	soft_tissue	fibrous_tissue_and_uncertain_origin	pancreas	NS	malignant_fibrous_histiocytoma-pleomorphic_sarcoma	storiform_pleomorphic	NS	NS
SARC	soft_tissue	fibrous_tissue_and_uncertain_origin	pancreas	NS	malignant_melanoma_of_soft_parts-clear_cell_sarcoma	NS	NS	NS
SARC	soft_tissue	fibrous_tissue_and_uncertain_origin	pancreas	NS	synovial_sarcoma	NS	NS	NS
SARC	soft_tissue	fibrous_tissue_and_uncertain_origin	paraspinal	NS	fibrosarcoma	myxofibrosarcoma	NS	NS
SARC	soft_tissue	fibrous_tissue_and_uncertain_origin	paraspinal	NS	fibrosarcoma	NS	NS	NS
SARC	soft_tissue	fibrous_tissue_and_uncertain_origin	paraspinal	NS	malignant_melanoma_of_soft_parts-clear_cell_sarcoma	NS	NS	NS
SARC	soft_tissue	fibrous_tissue_and_uncertain_origin	pelvic_cavity	NS	endometrial_stromal_sarcoma	NS	NS	NS
SARC	soft_tissue	fibrous_tissue_and_uncertain_origin	pelvis	NS	alveolar_soft_part_sarcoma	NS	NS	NS
SARC	soft_tissue	fibrous_tissue_and_uncertain_origin	pelvis	NS	dermatofibrosarcoma_protuberans	NS	NS	NS
SARC	soft_tissue	fibrous_tissue_and_uncertain_origin	pelvis	NS	fibrosarcoma	myxofibrosarcoma	NS	NS
SARC	soft_tissue	fibrous_tissue_and_uncertain_origin	pelvis	NS	malignant_fibrous_histiocytoma-pleomorphic_sarcoma	NS	NS	NS
SARC	soft_tissue	fibrous_tissue_and_uncertain_origin	pelvis	NS	malignant_melanoma_of_soft_parts-clear_cell_sarcoma	NS	NS	NS
SARC	soft_tissue	fibrous_tissue_and_uncertain_origin	pelvis	NS	sarcoma	NS	NS	NS
SARC	soft_tissue	fibrous_tissue_and_uncertain_origin	pelvis	NS	synovial_sarcoma	monophasic	NS	NS
SARC	soft_tissue	fibrous_tissue_and_uncertain_origin	pericardium	NS	synovial_sarcoma	monophasic	NS	NS
SARC	soft_tissue	fibrous_tissue_and_uncertain_origin	perineum	NS	dermatofibrosarcoma_protuberans	NS	NS	NS
SARC	soft_tissue	fibrous_tissue_and_uncertain_origin	perineum	NS	synovial_sarcoma	biphasic	NS	NS
SARC	soft_tissue	fibrous_tissue_and_uncertain_origin	peritoneum	NS	sclerosing_epithelioid_fibrosarcoma	NS	NS	NS
SARC	soft_tissue	fibrous_tissue_and_uncertain_origin	peritoneum	NS	synovial_sarcoma	monophasic	NS	NS
SARC	soft_tissue	fibrous_tissue_and_uncertain_origin	pharynx	NS	synovial_sarcoma	monophasic	NS	NS
SARC	soft_tissue	fibrous_tissue_and_uncertain_origin	pleura	NS	synovial_sarcoma	monophasic	NS	NS
SARC	soft_tissue	fibrous_tissue_and_uncertain_origin	pleura	NS	synovial_sarcoma	NS	NS	NS
SARC	soft_tissue	fibrous_tissue_and_uncertain_origin	popliteal_fossa	NS	congenital_(infantile)_fibrosarcoma	NS	NS	NS
SARC	soft_tissue	fibrous_tissue_and_uncertain_origin	popliteal_fossa	NS	malignant_melanoma_of_soft_parts-clear_cell_sarcoma	NS	NS	NS
SARC	soft_tissue	fibrous_tissue_and_uncertain_origin	popliteal_fossa	NS	synovial_sarcoma	NS	NS	NS
SARC	soft_tissue	fibrous_tissue_and_uncertain_origin	popliteal	NS	fibrosarcoma	myxofibrosarcoma	NS	NS
SARC	soft_tissue	fibrous_tissue_and_uncertain_origin	popliteal	NS	malignant_fibrous_histiocytoma-pleomorphic_sarcoma	NS	NS	NS
SARC	soft_tissue	fibrous_tissue_and_uncertain_origin	popliteal	NS	synovial_sarcoma	biphasic	NS	NS
SARC	soft_tissue	fibrous_tissue_and_uncertain_origin	prostate	NS	synovial_sarcoma	monophasic	NS	NS
SARC	soft_tissue	fibrous_tissue_and_uncertain_origin	proximal	NS	epithelioid_sarcoma	NS	NS	NS
SARC	soft_tissue	fibrous_tissue_and_uncertain_origin	retroperitoneum	NS	alveolar_soft_part_sarcoma	NS	NS	NS
SARC	soft_tissue	fibrous_tissue_and_uncertain_origin	retroperitoneum	NS	congenital_(infantile)_fibrosarcoma	NS	NS	NS
SARC	soft_tissue	fibrous_tissue_and_uncertain_origin	retroperitoneum	NS	fibrosarcoma	myxofibrosarcoma	NS	NS
SARC	soft_tissue	fibrous_tissue_and_uncertain_origin	retroperitoneum	NS	malignant_fibrous_histiocytoma-pleomorphic_sarcoma	myxoid	NS	NS
SARC	soft_tissue	fibrous_tissue_and_uncertain_origin	retroperitoneum	NS	malignant_fibrous_histiocytoma-pleomorphic_sarcoma	NS	NS	NS
SARC	soft_tissue	fibrous_tissue_and_uncertain_origin	retroperitoneum	NS	malignant_melanoma_of_soft_parts-clear_cell_sarcoma	NS	NS	NS
SARC	soft_tissue	fibrous_tissue_and_uncertain_origin	retroperitoneum	NS	sarcoma	NS	NS	NS
SARC	soft_tissue	fibrous_tissue_and_uncertain_origin	retroperitoneum	NS	synovial_sarcoma	biphasic	NS	NS
SARC	soft_tissue	fibrous_tissue_and_uncertain_origin	retroperitoneum	NS	synovial_sarcoma	monophasic	NS	NS
SARC	soft_tissue	fibrous_tissue_and_uncertain_origin	salivary_gland	NS	malignant_melanoma_of_soft_parts-clear_cell_sarcoma	NS	NS	NS
SARC	soft_tissue	fibrous_tissue_and_uncertain_origin	scalp	NS	dermatofibrosarcoma_protuberans	NS	NS	NS
SARC	soft_tissue	fibrous_tissue_and_uncertain_origin	scalp	NS	fibrosarcoma	NS	NS	NS
SARC	soft_tissue	fibrous_tissue_and_uncertain_origin	scalp	NS	malignant_fibrous_histiocytoma-pleomorphic_sarcoma	giant_cell	NS	NS
SARC	soft_tissue	fibrous_tissue_and_uncertain_origin	scalp	NS	malignant_fibrous_histiocytoma-pleomorphic_sarcoma	NS	NS	NS
SARC	soft_tissue	fibrous_tissue_and_uncertain_origin	scalp	NS	malignant_melanoma_of_soft_parts-clear_cell_sarcoma	NS	NS	NS
SARC	soft_tissue	fibrous_tissue_and_uncertain_origin	scalp	NS	synovial_sarcoma	monophasic	NS	NS
SARC	soft_tissue	fibrous_tissue_and_uncertain_origin	scrotum	NS	synovial_sarcoma	biphasic	NS	NS
SARC	soft_tissue	fibrous_tissue_and_uncertain_origin	shoulder	NS	alveolar_soft_part_sarcoma	NS	NS	NS
SARC	soft_tissue	fibrous_tissue_and_uncertain_origin	shoulder	NS	congenital_(infantile)_fibrosarcoma	NS	NS	NS
SARC	soft_tissue	fibrous_tissue_and_uncertain_origin	shoulder	NS	dermatofibrosarcoma_protuberans	NS	NS	NS
SARC	soft_tissue	fibrous_tissue_and_uncertain_origin	shoulder	NS	fibrosarcoma	myxofibrosarcoma	NS	NS
SARC	soft_tissue	fibrous_tissue_and_uncertain_origin	shoulder	NS	fibrosarcoma	NS	NS	NS
SARC	soft_tissue	fibrous_tissue_and_uncertain_origin	shoulder	NS	malignant_fibrous_histiocytoma-pleomorphic_sarcoma	NS	NS	NS
SARC	soft_tissue	fibrous_tissue_and_uncertain_origin	shoulder	NS	malignant_fibrous_histiocytoma-pleomorphic_sarcoma	storiform_pleomorphic	NS	NS
SARC	soft_tissue	fibrous_tissue_and_uncertain_origin	shoulder	NS	malignant_melanoma_of_soft_parts-clear_cell_sarcoma	NS	NS	NS
SARC	soft_tissue	fibrous_tissue_and_uncertain_origin	shoulder	NS	synovial_sarcoma	biphasic	NS	NS
SARC	soft_tissue	fibrous_tissue_and_uncertain_origin	shoulder	NS	synovial_sarcoma	monophasic	NS	NS
SARC	soft_tissue	fibrous_tissue_and_uncertain_origin	shoulder	NS	synovial_sarcoma	NS	NS	NS
SARC	soft_tissue	fibrous_tissue_and_uncertain_origin	shoulder	NS	synovial_sarcoma	poorly_differentiated	NS	NS
SARC	soft_tissue	fibrous_tissue_and_uncertain_origin	skin	NS	malignant_fibrous_histiocytoma-pleomorphic_sarcoma	NS	NS	NS
SARC	soft_tissue	fibrous_tissue_and_uncertain_origin	skin	NS	sarcoma	NS	NS	NS
SARC	soft_tissue	fibrous_tissue_and_uncertain_origin	small_intestine	NS	fibrosarcoma	myxofibrosarcoma	NS	NS
SARC	soft_tissue	fibrous_tissue_and_uncertain_origin	small_intestine	NS	fibrosarcoma	NS	NS	NS
SARC	soft_tissue	fibrous_tissue_and_uncertain_origin	small_intestine	NS	malignant_melanoma_of_soft_parts-clear_cell_sarcoma	NS	NS	NS
SARC	soft_tissue	fibrous_tissue_and_uncertain_origin	small_intestine	NS	sclerosing_epithelioid_fibrosarcoma	NS	NS	NS
SARC	soft_tissue	fibrous_tissue_and_uncertain_origin	small_intestine	NS	synovial_sarcoma	monophasic	NS	NS
SARC	soft_tissue	fibrous_tissue_and_uncertain_origin	sole	NS	malignant_melanoma_of_soft_parts-clear_cell_sarcoma	NS	NS	NS
SARC	soft_tissue	fibrous_tissue_and_uncertain_origin	spine	NS	alveolar_soft_part_sarcoma	NS	NS	NS
SARC	soft_tissue	fibrous_tissue_and_uncertain_origin	spine	NS	malignant_melanoma_of_soft_parts-clear_cell_sarcoma	NS	NS	NS
SARC	soft_tissue	fibrous_tissue_and_uncertain_origin	sternoclavicular	NS	sarcoma	NS	NS	NS
SARC	soft_tissue	fibrous_tissue_and_uncertain_origin	sternum	NS	dermatofibrosarcoma_protuberans	NS	NS	NS
SARC	soft_tissue	fibrous_tissue_and_uncertain_origin	stomach	NS	malignant_melanoma_of_soft_parts-clear_cell_sarcoma	NS	NS	NS
SARC	soft_tissue	fibrous_tissue_and_uncertain_origin	stomach	NS	sarcoma	NS	NS	NS
SARC	soft_tissue	fibrous_tissue_and_uncertain_origin	supra-orbital	NS	sarcoma	NS	NS	NS
SARC	soft_tissue	fibrous_tissue_and_uncertain_origin	thyroid	NS	sarcoma	NS	NS	NS
SARC	soft_tissue	fibrous_tissue_and_uncertain_origin	toe	NS	fibrosarcoma	myxofibrosarcoma	NS	NS
SARC	soft_tissue	fibrous_tissue_and_uncertain_origin	tongue	NS	malignant_melanoma_of_soft_parts-clear_cell_sarcoma	NS	NS	NS
SARC	soft_tissue	fibrous_tissue_and_uncertain_origin	trunk	NS	congenital_(infantile)_fibrosarcoma	NS	NS	NS
SARC	soft_tissue	fibrous_tissue_and_uncertain_origin	trunk	NS	dermatofibrosarcoma_protuberans	NS	NS	NS
SARC	soft_tissue	fibrous_tissue_and_uncertain_origin	trunk	NS	malignant_fibrous_histiocytoma-pleomorphic_sarcoma	NS	NS	NS
SARC	soft_tissue	fibrous_tissue_and_uncertain_origin	trunk	NS	synovial_sarcoma	biphasic	NS	NS
SARC	soft_tissue	fibrous_tissue_and_uncertain_origin	trunk	NS	synovial_sarcoma	monophasic	NS	NS
SARC	soft_tissue	fibrous_tissue_and_uncertain_origin	upper_arm	NS	alveolar_soft_part_sarcoma	NS	NS	NS
SARC	soft_tissue	fibrous_tissue_and_uncertain_origin	upper_arm	NS	dermatofibrosarcoma_protuberans	NS	NS	NS
SARC	soft_tissue	fibrous_tissue_and_uncertain_origin	upper_arm	NS	epithelioid_sarcoma	NS	NS	NS
SARC	soft_tissue	fibrous_tissue_and_uncertain_origin	upper_arm	NS	Ewings_sarcoma-peripheral_primitive_neuroectodermal_tumour	NS	NS	NS
SARC	soft_tissue	fibrous_tissue_and_uncertain_origin	upper_arm	NS	fibrosarcoma	myxofibrosarcoma	NS	NS
SARC	soft_tissue	fibrous_tissue_and_uncertain_origin	upper_arm	NS	malignant_fibrous_histiocytoma-pleomorphic_sarcoma	myxoid	NS	NS
SARC	soft_tissue	fibrous_tissue_and_uncertain_origin	upper_arm	NS	malignant_fibrous_histiocytoma-pleomorphic_sarcoma	NS	NS	NS
SARC	soft_tissue	fibrous_tissue_and_uncertain_origin	upper_arm	NS	malignant_fibrous_histiocytoma-pleomorphic_sarcoma	storiform_pleomorphic	NS	NS
SARC	soft_tissue	fibrous_tissue_and_uncertain_origin	upper_arm	NS	sarcoma	spindle	NS	NS
SARC	soft_tissue	fibrous_tissue_and_uncertain_origin	upper_arm	NS	synovial_sarcoma	biphasic	NS	NS
SARC	soft_tissue	fibrous_tissue_and_uncertain_origin	upper_arm	NS	synovial_sarcoma	monophasic	NS	NS
SARC	soft_tissue	fibrous_tissue_and_uncertain_origin	upper_arm	NS	synovial_sarcoma	NS	NS	NS
SARC	soft_tissue	fibrous_tissue_and_uncertain_origin	upper_extremity	NS	malignant_fibrous_histiocytoma-pleomorphic_sarcoma	myxoid	NS	NS
SARC	soft_tissue	fibrous_tissue_and_uncertain_origin	upper_extremity	NS	malignant_fibrous_histiocytoma-pleomorphic_sarcoma	NS	NS	NS
SARC	soft_tissue	fibrous_tissue_and_uncertain_origin	upper_leg	NS	alveolar_soft_part_sarcoma	NS	NS	NS
SARC	soft_tissue	fibrous_tissue_and_uncertain_origin	upper_leg	NS	biphenotypic_sarcoma_with_myogenic_and_neural_differentiation	NS	NS	NS
SARC	soft_tissue	fibrous_tissue_and_uncertain_origin	upper_leg	NS	congenital_(infantile)_fibrosarcoma	NS	NS	NS
SARC	soft_tissue	fibrous_tissue_and_uncertain_origin	upper_leg	NS	dermatofibrosarcoma_protuberans	NS	NS	NS
SARC	soft_tissue	fibrous_tissue_and_uncertain_origin	upper_leg	NS	fibrosarcoma	myxofibrosarcoma	NS	NS
SARC	soft_tissue	fibrous_tissue_and_uncertain_origin	upper_leg	NS	fibrosarcoma	NS	NS	NS
SARC	soft_tissue	fibrous_tissue_and_uncertain_origin	upper_leg	NS	malignant_fibrous_histiocytoma-pleomorphic_sarcoma	giant_cell	NS	NS
SARC	soft_tissue	fibrous_tissue_and_uncertain_origin	upper_leg	NS	malignant_fibrous_histiocytoma-pleomorphic_sarcoma	myxoid	NS	NS
SARC	soft_tissue	fibrous_tissue_and_uncertain_origin	upper_leg	NS	malignant_fibrous_histiocytoma-pleomorphic_sarcoma	NS	NS	NS
SARC	soft_tissue	fibrous_tissue_and_uncertain_origin	upper_leg	NS	malignant_fibrous_histiocytoma-pleomorphic_sarcoma	storiform_pleomorphic	NS	NS
SARC	soft_tissue	fibrous_tissue_and_uncertain_origin	upper_leg	NS	malignant_melanoma_of_soft_parts-clear_cell_sarcoma	NS	NS	NS
SARC	soft_tissue	fibrous_tissue_and_uncertain_origin	upper_leg	NS	sarcoma	spindle	NS	NS
SARC	soft_tissue	fibrous_tissue_and_uncertain_origin	upper_leg	NS	synovial_sarcoma	biphasic	NS	NS
SARC	soft_tissue	fibrous_tissue_and_uncertain_origin	upper_leg	NS	synovial_sarcoma	monophasic	NS	NS
SARC	soft_tissue	fibrous_tissue_and_uncertain_origin	upper_leg	NS	synovial_sarcoma	NS	NS	NS
SARC	soft_tissue	fibrous_tissue_and_uncertain_origin	upper_leg	NS	synovial_sarcoma	poorly_differentiated	NS	NS
SARC	soft_tissue	fibrous_tissue_and_uncertain_origin	uterus	NS	sarcoma	NS	NS	NS
SARC	soft_tissue	fibrous_tissue_and_uncertain_origin	uterus	NS	sclerosing_epithelioid_fibrosarcoma	NS	NS	NS
SARC	soft_tissue	fibrous_tissue_and_uncertain_origin	vulva	NS	dermatofibrosarcoma_protuberans	NS	NS	NS
SARC	soft_tissue	fibrous_tissue_and_uncertain_origin	vulva	NS	sarcoma	NS	NS	NS
SARC	soft_tissue	muscle_and_neural_differentiation	chest_wall	NS	biphenotypic_sarcoma_with_myogenic_and_neural_differentiation	NS	NS	NS
SARC	soft_tissue	muscle_and_neural_differentiation	hand	NS	biphenotypic_sarcoma_with_myogenic_and_neural_differentiation	NS	NS	NS
SARC	soft_tissue	muscle_and_neural_differentiation	NS	NS	biphenotypic_sarcoma_with_myogenic_and_neural_differentiation	NS	NS	NS
SARC	soft_tissue	muscle_and_neural_differentiation	retroperitoneum	NS	biphenotypic_sarcoma_with_myogenic_and_neural_differentiation	NS	NS	NS
SARC	soft_tissue	muscle_and_neural_differentiation	upper_arm	NS	biphenotypic_sarcoma_with_myogenic_and_neural_differentiation	NS	NS	NS
SARC	soft_tissue	nerve_sheath	arm	NS	malignant_peripheral_nerve_sheath_tumour	with_rhabdomyosarcomatous_differentiation	NS	NS
SARC	soft_tissue	nerve_sheath	foot	NS	sarcoma	NS	NS	NS
SARC	soft_tissue	nerve_sheath	neck	NS	sarcoma	NS	NS	NS
SARC	soft_tissue	nerve_sheath	NS	NS	sarcoma	NS	NS	NS
SARC	soft_tissue	nerve_sheath	orbit	NS	malignant_peripheral_nerve_sheath_tumour	with_rhabdomyosarcomatous_differentiation	NS	NS
SARC	soft_tissue	NS	face	NS	sarcoma	NS	NS	NS
SARC	soft_tissue	NS	female_genital_tract_(site_indeterminate)	NS	sarcoma	NS	NS	NS
SARC	soft_tissue	NS	head_neck	NS	sarcoma	NS	NS	NS
SARC	soft_tissue	NS	leg	NS	sarcoma	NS	NS	NS
SARC	soft_tissue	NS	liver	NS	sarcoma	NS	NS	NS
SARC	soft_tissue	NS	NS	NS	sarcoma	NS	NS	NS
SARC	soft_tissue	NS	upper_leg	NS	sarcoma	NS	NS	NS
SARC	soft_tissue	smooth_muscle	abdomen	NS	leiomyosarcoma	NS	NS	NS
SARC	soft_tissue	smooth_muscle	abdominal_wall	NS	leiomyosarcoma	NS	NS	NS
SARC	soft_tissue	smooth_muscle	arm	NS	leiomyosarcoma	NS	NS	NS
SARC	soft_tissue	smooth_muscle	axilla	NS	leiomyosarcoma	NS	NS	NS
SARC	soft_tissue	smooth_muscle	back	NS	leiomyosarcoma	NS	NS	NS
SARC	soft_tissue	smooth_muscle	bladder	NS	leiomyosarcoma	NS	NS	NS
SARC	soft_tissue	smooth_muscle	bone	NS	leiomyosarcoma	NS	NS	NS
SARC	soft_tissue	smooth_muscle	breast	NS	leiomyosarcoma	NS	NS	NS
SARC	soft_tissue	smooth_muscle	buttock	NS	leiomyosarcoma	NS	NS	NS
SARC	soft_tissue	smooth_muscle	buttock	NS	rhabdomyosarcoma	embryonal	NS	NS
SARC	soft_tissue	smooth_muscle	chest	NS	leiomyosarcoma	NS	NS	NS
SARC	soft_tissue	smooth_muscle	chest_wall	NS	leiomyosarcoma	NS	NS	NS
SARC	soft_tissue	smooth_muscle	elbow	NS	leiomyosarcoma	NS	NS	NS
SARC	soft_tissue	smooth_muscle	endometrium	NS	leiomyosarcoma	NS	NS	NS
SARC	soft_tissue	smooth_muscle	extremity	NS	leiomyosarcoma	NS	NS	NS
SARC	soft_tissue	smooth_muscle	Fallopian_tube	NS	leiomyosarcoma	NS	NS	NS
SARC	soft_tissue	smooth_muscle	forearm	NS	leiomyosarcoma	NS	NS	NS
SARC	soft_tissue	smooth_muscle	groin	NS	leiomyosarcoma	NS	NS	NS
SARC	soft_tissue	smooth_muscle	head_neck	NS	leiomyosarcoma	NS	NS	NS
SARC	soft_tissue	smooth_muscle	hip	NS	leiomyosarcoma	NS	NS	NS
SARC	soft_tissue	smooth_muscle	ilium	NS	leiomyosarcoma	NS	NS	NS
SARC	soft_tissue	smooth_muscle	inferior_vena_cava	NS	leiomyosarcoma	NS	NS	NS
SARC	soft_tissue	smooth_muscle	kidney	NS	leiomyosarcoma	NS	NS	NS
SARC	soft_tissue	smooth_muscle	knee	NS	leiomyosarcoma	NS	NS	NS
SARC	soft_tissue	smooth_muscle	knee	NS	rhabdomyosarcoma	embryonal	NS	NS
SARC	soft_tissue	smooth_muscle	large_intestine	NS	leiomyosarcoma	NS	NS	NS
SARC	soft_tissue	smooth_muscle	leg	NS	leiomyosarcoma	NS	NS	NS
SARC	soft_tissue	smooth_muscle	liver	NS	leiomyosarcoma	NS	NS	NS
SARC	soft_tissue	smooth_muscle	lower_extremity	NS	leiomyosarcoma	NS	NS	NS
SARC	soft_tissue	smooth_muscle	lower_leg	NS	leiomyosarcoma	NS	NS	NS
SARC	soft_tissue	smooth_muscle	lung	NS	leiomyosarcoma	NS	NS	NS
SARC	soft_tissue	smooth_muscle	mesentery	NS	leiomyosarcoma	NS	NS	NS
SARC	soft_tissue	smooth_muscle	neck	NS	leiomyosarcoma	NS	NS	NS
SARC	soft_tissue	smooth_muscle	nose	NS	leiomyosarcoma	NS	NS	NS
SARC	soft_tissue	smooth_muscle	NS	NS	leiomyosarcoma	NS	NS	NS
SARC	soft_tissue	smooth_muscle	oropharynx	NS	leiomyosarcoma	NS	NS	NS
SARC	soft_tissue	smooth_muscle	ovary	NS	leiomyosarcoma	NS	NS	NS
SARC	soft_tissue	smooth_muscle	pelvis	NS	leiomyosarcoma	NS	NS	NS
SARC	soft_tissue	smooth_muscle	penis	NS	leiomyosarcoma	NS	NS	NS
SARC	soft_tissue	smooth_muscle	perineum	NS	leiomyosarcoma	NS	NS	NS
SARC	soft_tissue	smooth_muscle	retroperitoneum-duodenum	NS	leiomyosarcoma	NS	NS	NS
SARC	soft_tissue	smooth_muscle	retroperitoneum	NS	leiomyosarcoma	NS	NS	NS
SARC	soft_tissue	smooth_muscle	shoulder	NS	leiomyosarcoma	NS	NS	NS
SARC	soft_tissue	smooth_muscle	small_intestine	NS	leiomyosarcoma	NS	NS	NS
SARC	soft_tissue	smooth_muscle	spermatic_cord	NS	leiomyosarcoma	NS	NS	NS
SARC	soft_tissue	smooth_muscle	stomach	NS	leiomyosarcoma	NS	NS	NS
SARC	soft_tissue	smooth_muscle	trunk	NS	leiomyosarcoma	NS	NS	NS
SARC	soft_tissue	smooth_muscle	upper_arm	NS	leiomyosarcoma	NS	NS	NS
SARC	soft_tissue	smooth_muscle	upper_leg	NS	leiomyosarcoma	NS	NS	NS
SARC	soft_tissue	smooth_muscle	uterus	NS	leiomyosarcoma	NS	NS	NS
SARC	soft_tissue	smooth_muscle	vagina	NS	leiomyosarcoma	NS	NS	NS
SARC	soft_tissue	smooth_muscle	vein	NS	leiomyosarcoma	NS	NS	NS
SARC	soft_tissue	smooth_muscle	vena_cava	NS	leiomyosarcoma	NS	NS	NS
SARC	soft_tissue	smooth_muscle	vulva	NS	leiomyosarcoma	NS	NS	NS
SARC	soft_tissue	striated_muscle	abdomen	NS	rhabdomyosarcoma	alveolar	NS	NS
SARC	soft_tissue	striated_muscle	abdomen	NS	rhabdomyosarcoma	embryonal	NS	NS
SARC	soft_tissue	striated_muscle	abdominal_wall	NS	rhabdomyosarcoma	alveolar	solid_variant	NS
SARC	soft_tissue	striated_muscle	abdominal_wall	NS	rhabdomyosarcoma	embryonal	NS	NS
SARC	soft_tissue	striated_muscle	abdominal_wall	NS	rhabdomyosarcoma	embryonal	spindle_cell	NS
SARC	soft_tissue	striated_muscle	Achilles_tendon	NS	rhabdomyosarcoma	embryonal	NS	NS
SARC	soft_tissue	striated_muscle	arm	NS	rhabdomyosarcoma	alveolar	NS	NS
SARC	soft_tissue	striated_muscle	arm	NS	rhabdomyosarcoma	embryonal	NS	NS
SARC	soft_tissue	striated_muscle	arm	NS	rhabdomyosarcoma	embryonal	spindle_cell	NS
SARC	soft_tissue	striated_muscle	axilla	NS	rhabdomyosarcoma	embryonal	NS	NS
SARC	soft_tissue	striated_muscle	axilla	NS	rhabdomyosarcoma	pleomorphic	NS	NS
SARC	soft_tissue	striated_muscle	back	NS	rhabdomyosarcoma	embryonal	NS	NS
SARC	soft_tissue	striated_muscle	back	NS	rhabdomyosarcoma	embryonal	spindle_cell	NS
SARC	soft_tissue	striated_muscle	back	NS	rhabdomyosarcoma	NS	NS	NS
SARC	soft_tissue	striated_muscle	base_of_skull	NS	rhabdomyosarcoma	alveolar	NS	NS
SARC	soft_tissue	striated_muscle	biliary_tract	NS	rhabdomyosarcoma	embryonal	NS	NS
SARC	soft_tissue	striated_muscle	bladder	NS	rhabdomyosarcoma	embryonal	botryoid	NS
SARC	soft_tissue	striated_muscle	bladder	NS	rhabdomyosarcoma	embryonal	NS	NS
SARC	soft_tissue	striated_muscle	buttock	NS	rhabdomyosarcoma	alveolar	NS	NS
SARC	soft_tissue	striated_muscle	buttock	NS	rhabdomyosarcoma	embryonal	NS	NS
SARC	soft_tissue	striated_muscle	buttock	NS	rhabdomyosarcoma	embryonal	spindle_cell	NS
SARC	soft_tissue	striated_muscle	buttock	NS	rhabdomyosarcoma	NS	NS	NS
SARC	soft_tissue	striated_muscle	buttock	NS	rhabdomyosarcoma	pleomorphic	NS	NS
SARC	soft_tissue	striated_muscle	cervix	NS	rhabdomyosarcoma	embryonal	botryoid	NS
SARC	soft_tissue	striated_muscle	cervix	NS	rhabdomyosarcoma	embryonal	NS	NS
SARC	soft_tissue	striated_muscle	cheek	NS	rhabdomyosarcoma	embryonal	NS	NS
SARC	soft_tissue	striated_muscle	chest	NS	rhabdomyosarcoma	alveolar	NS	NS
SARC	soft_tissue	striated_muscle	chest	NS	rhabdomyosarcoma	embryonal	NS	NS
SARC	soft_tissue	striated_muscle	chest_wall	NS	rhabdomyosarcoma	embryonal	NS	NS
SARC	soft_tissue	striated_muscle	chest_wall	NS	rhabdomyosarcoma	embryonal	spindle_cell	NS
SARC	soft_tissue	striated_muscle	chest_wall	NS	rhabdomyosarcoma	sclerosing	NS	NS
SARC	soft_tissue	striated_muscle	diaphragm	NS	rhabdomyosarcoma	embryonal	NS	NS
SARC	soft_tissue	striated_muscle	elbow	NS	rhabdomyosarcoma	alveolar	NS	NS
SARC	soft_tissue	striated_muscle	elbow	NS	rhabdomyosarcoma	embryonal	spindle_cell	NS
SARC	soft_tissue	striated_muscle	elbow	NS	rhabdomyosarcoma	sclerosing	NS	NS
SARC	soft_tissue	striated_muscle	extremity	NS	rhabdomyosarcoma	alveolar	NS	NS
SARC	soft_tissue	striated_muscle	extremity	NS	rhabdomyosarcoma	embryonal	NS	NS
SARC	soft_tissue	striated_muscle	extremity	NS	rhabdomyosarcoma	mixed	NS	NS
SARC	soft_tissue	striated_muscle	face	NS	rhabdomyosarcoma	alveolar	NS	NS
SARC	soft_tissue	striated_muscle	face	NS	rhabdomyosarcoma	embryonal	NS	NS
SARC	soft_tissue	striated_muscle	face	NS	rhabdomyosarcoma	embryonal	spindle_cell	NS
SARC	soft_tissue	striated_muscle	face	NS	rhabdomyosarcoma	NS	NS	NS
SARC	soft_tissue	striated_muscle	face	NS	rhabdomyosarcoma	sclerosing	NS	NS
SARC	soft_tissue	striated_muscle	female_genital_tract_(site_indeterminate)	NS	rhabdomyosarcoma	embryonal	NS	NS
SARC	soft_tissue	striated_muscle	flank	NS	rhabdomyosarcoma	embryonal	NS	NS
SARC	soft_tissue	striated_muscle	foot	NS	rhabdomyosarcoma	alveolar	NS	NS
SARC	soft_tissue	striated_muscle	foot	NS	rhabdomyosarcoma	sclerosing	NS	NS
SARC	soft_tissue	striated_muscle	forearm	NS	rhabdomyosarcoma	alveolar	NS	NS
SARC	soft_tissue	striated_muscle	forearm	NS	rhabdomyosarcoma	alveolar	solid_variant	NS
SARC	soft_tissue	striated_muscle	forearm	NS	rhabdomyosarcoma	embryonal	NS	NS
SARC	soft_tissue	striated_muscle	forearm	NS	rhabdomyosarcoma	embryonal	spindle_cell	NS
SARC	soft_tissue	striated_muscle	genital_tract	NS	rhabdomyosarcoma	mixed	NS	NS
SARC	soft_tissue	striated_muscle	genitourinary_tract	NS	rhabdomyosarcoma	alveolar	NS	NS
SARC	soft_tissue	striated_muscle	genitourinary_tract	NS	rhabdomyosarcoma	embryonal	NS	NS
SARC	soft_tissue	striated_muscle	hand	NS	rhabdomyosarcoma	alveolar	NS	NS
SARC	soft_tissue	striated_muscle	head_neck	NS	rhabdomyosarcoma	alveolar	NS	NS
SARC	soft_tissue	striated_muscle	head_neck	NS	rhabdomyosarcoma	embryonal	NS	NS
SARC	soft_tissue	striated_muscle	head_neck	NS	rhabdomyosarcoma	sclerosing	NS	NS
SARC	soft_tissue	striated_muscle	heart	NS	rhabdomyosarcoma	embryonal	NS	NS
SARC	soft_tissue	striated_muscle	heart	NS	rhabdomyosarcoma	NS	NS	NS
SARC	soft_tissue	striated_muscle	hip	NS	rhabdomyosarcoma	embryonal	spindle_cell	NS
SARC	soft_tissue	striated_muscle	jaw	NS	rhabdomyosarcoma	embryonal	NS	NS
SARC	soft_tissue	striated_muscle	kidney	NS	rhabdomyosarcoma	embryonal	NS	NS
SARC	soft_tissue	striated_muscle	kidney	NS	rhabdomyosarcoma	NS	NS	NS
SARC	soft_tissue	striated_muscle	large_intestine	NS	rhabdomyosarcoma	alveolar	NS	NS
SARC	soft_tissue	striated_muscle	larynx	NS	rhabdomyosarcoma	embryonal	NS	NS
SARC	soft_tissue	striated_muscle	leg	NS	rhabdomyosarcoma	alveolar	NS	NS
SARC	soft_tissue	striated_muscle	leg	NS	rhabdomyosarcoma	embryonal	NS	NS
SARC	soft_tissue	striated_muscle	leg	NS	rhabdomyosarcoma	embryonal	spindle_cell	NS
SARC	soft_tissue	striated_muscle	liver	NS	rhabdomyosarcoma	embryonal	NS	NS
SARC	soft_tissue	striated_muscle	lower_extremity	NS	rhabdomyosarcoma	alveolar	NS	NS
SARC	soft_tissue	striated_muscle	lower_leg	NS	rhabdomyosarcoma	alveolar	NS	NS
SARC	soft_tissue	striated_muscle	lower_leg	NS	rhabdomyosarcoma	embryonal	NS	NS
SARC	soft_tissue	striated_muscle	lower_leg	NS	rhabdomyosarcoma	embryonal	spindle_cell	NS
SARC	soft_tissue	striated_muscle	lower_leg	NS	rhabdomyosarcoma	sclerosing	NS	NS
SARC	soft_tissue	striated_muscle	lung	NS	rhabdomyosarcoma	embryonal	NS	NS
SARC	soft_tissue	striated_muscle	lung	NS	rhabdomyosarcoma	embryonal	spindle_cell	NS
SARC	soft_tissue	striated_muscle	lymph_node	NS	rhabdomyosarcoma	embryonal	NS	NS
SARC	soft_tissue	striated_muscle	maxillary	NS	rhabdomyosarcoma	sclerosing	NS	NS
SARC	soft_tissue	striated_muscle	mediastinum	NS	rhabdomyosarcoma	alveolar	solid_variant	NS
SARC	soft_tissue	striated_muscle	mediastinum	NS	rhabdomyosarcoma	embryonal	NS	NS
SARC	soft_tissue	striated_muscle	mesentery	NS	rhabdomyosarcoma	embryonal	spindle_cell	NS
SARC	soft_tissue	striated_muscle	middle_ear	NS	rhabdomyosarcoma	embryonal	NS	NS
SARC	soft_tissue	striated_muscle	mouth	NS	rhabdomyosarcoma	embryonal	spindle_cell	NS
SARC	soft_tissue	striated_muscle	mouth	NS	rhabdomyosarcoma	sclerosing	NS	NS
SARC	soft_tissue	striated_muscle	neck	NS	rhabdomyosarcoma	embryonal	NS	NS
SARC	soft_tissue	striated_muscle	neck	NS	rhabdomyosarcoma	embryonal	spindle_cell	NS
SARC	soft_tissue	striated_muscle	nose	NS	rhabdomyosarcoma	alveolar	solid_variant	NS
SARC	soft_tissue	striated_muscle	nose	NS	rhabdomyosarcoma	embryonal	NS	NS
SARC	soft_tissue	striated_muscle	nose	NS	rhabdomyosarcoma	NS	NS	NS
SARC	soft_tissue	striated_muscle	NS	NS	rhabdomyosarcoma	alveolar	NS	NS
SARC	soft_tissue	striated_muscle	NS	NS	rhabdomyosarcoma	alveolar	solid_variant	NS
SARC	soft_tissue	striated_muscle	NS	NS	rhabdomyosarcoma	embryonal	botryoid	NS
SARC	soft_tissue	striated_muscle	NS	NS	rhabdomyosarcoma	embryonal	NS	NS
SARC	soft_tissue	striated_muscle	NS	NS	rhabdomyosarcoma	embryonal	spindle_cell	NS
SARC	soft_tissue	striated_muscle	NS	NS	rhabdomyosarcoma	mixed	NS	NS
SARC	soft_tissue	striated_muscle	NS	NS	rhabdomyosarcoma	NS	NS	NS
SARC	soft_tissue	striated_muscle	NS	NS	rhabdomyosarcoma	pleomorphic	NS	NS
SARC	soft_tissue	striated_muscle	NS	NS	rhabdomyosarcoma	sclerosing	NS	NS
SARC	soft_tissue	striated_muscle	omentum	NS	rhabdomyosarcoma	embryonal	NS	NS
SARC	soft_tissue	striated_muscle	orbit	NS	rhabdomyosarcoma	alveolar	NS	NS
SARC	soft_tissue	striated_muscle	orbit	NS	rhabdomyosarcoma	embryonal	NS	NS
SARC	soft_tissue	striated_muscle	orbit	NS	rhabdomyosarcoma	sclerosing	NS	NS
SARC	soft_tissue	striated_muscle	ovary	NS	rhabdomyosarcoma	embryonal	NS	NS
SARC	soft_tissue	striated_muscle	parameningeal	NS	rhabdomyosarcoma	alveolar	NS	NS
SARC	soft_tissue	striated_muscle	parameningeal	NS	rhabdomyosarcoma	embryonal	NS	NS
SARC	soft_tissue	striated_muscle	paraspinal	NS	rhabdomyosarcoma	embryonal	NS	NS
SARC	soft_tissue	striated_muscle	paraspinal	NS	rhabdomyosarcoma	embryonal	spindle_cell	NS
SARC	soft_tissue	striated_muscle	paraspinal	NS	rhabdomyosarcoma	mixed	NS	NS
SARC	soft_tissue	striated_muscle	paratestis	NS	rhabdomyosarcoma	alveolar	NS	NS
SARC	soft_tissue	striated_muscle	paratestis	NS	rhabdomyosarcoma	embryonal	NS	NS
SARC	soft_tissue	striated_muscle	paratestis	NS	rhabdomyosarcoma	embryonal	spindle_cell	NS
SARC	soft_tissue	striated_muscle	paratestis	NS	rhabdomyosarcoma	mixed	NS	NS
SARC	soft_tissue	striated_muscle	parotid	NS	rhabdomyosarcoma	alveolar	NS	NS
SARC	soft_tissue	striated_muscle	parotid	NS	rhabdomyosarcoma	embryonal	NS	NS
SARC	soft_tissue	striated_muscle	parotid	NS	rhabdomyosarcoma	embryonal	spindle_cell	NS
SARC	soft_tissue	striated_muscle	parotid	NS	rhabdomyosarcoma	mixed	NS	NS
SARC	soft_tissue	striated_muscle	parotid	NS	rhabdomyosarcoma	sclerosing	NS	NS
SARC	soft_tissue	striated_muscle	pelvic_cavity	NS	rhabdomyosarcoma	embryonal	NS	NS
SARC	soft_tissue	striated_muscle	pelvis	NS	rhabdomyosarcoma	alveolar	NS	NS
SARC	soft_tissue	striated_muscle	pelvis	NS	rhabdomyosarcoma	embryonal	NS	NS
SARC	soft_tissue	striated_muscle	pelvis	NS	rhabdomyosarcoma	embryonal	spindle_cell	NS
SARC	soft_tissue	striated_muscle	pelvis	NS	rhabdomyosarcoma	NS	NS	NS
SARC	soft_tissue	striated_muscle	penis	NS	rhabdomyosarcoma	embryonal	NS	NS
SARC	soft_tissue	striated_muscle	perineum	NS	rhabdomyosarcoma	alveolar	NS	NS
SARC	soft_tissue	striated_muscle	perineum	NS	rhabdomyosarcoma	embryonal	NS	NS
SARC	soft_tissue	striated_muscle	perineum	NS	rhabdomyosarcoma	mixed	NS	NS
SARC	soft_tissue	striated_muscle	pharynx	NS	rhabdomyosarcoma	alveolar	NS	NS
SARC	soft_tissue	striated_muscle	pharynx	NS	rhabdomyosarcoma	embryonal	NS	NS
SARC	soft_tissue	striated_muscle	pharynx	NS	rhabdomyosarcoma	embryonal	spindle_cell	NS
SARC	soft_tissue	striated_muscle	prostate	NS	rhabdomyosarcoma	embryonal	botryoid	NS
SARC	soft_tissue	striated_muscle	prostate	NS	rhabdomyosarcoma	embryonal	NS	NS
SARC	soft_tissue	striated_muscle	prostate	NS	rhabdomyosarcoma	embryonal	spindle_cell	NS
SARC	soft_tissue	striated_muscle	prostate	NS	rhabdomyosarcoma	mixed	NS	NS
SARC	soft_tissue	striated_muscle	retroperitoneum	NS	rhabdomyosarcoma	alveolar	NS	NS
SARC	soft_tissue	striated_muscle	retroperitoneum	NS	rhabdomyosarcoma	embryonal	NS	NS
SARC	soft_tissue	striated_muscle	retroperitoneum	NS	rhabdomyosarcoma	embryonal	spindle_cell	NS
SARC	soft_tissue	striated_muscle	scalp	NS	rhabdomyosarcoma	embryonal	NS	NS
SARC	soft_tissue	striated_muscle	scalp	NS	rhabdomyosarcoma	pleomorphic	NS	NS
SARC	soft_tissue	striated_muscle	shoulder	NS	rhabdomyosarcoma	alveolar	NS	NS
SARC	soft_tissue	striated_muscle	shoulder	NS	rhabdomyosarcoma	embryonal	NS	NS
SARC	soft_tissue	striated_muscle	shoulder	NS	rhabdomyosarcoma	embryonal	spindle_cell	NS
SARC	soft_tissue	striated_muscle	sinonasal_and_nasal_cavity	NS	rhabdomyosarcoma	alveolar	NS	NS
SARC	soft_tissue	striated_muscle	sinonasal	NS	rhabdomyosarcoma	alveolar	NS	NS
SARC	soft_tissue	striated_muscle	sinonasal	NS	rhabdomyosarcoma	alveolar	solid_variant	NS
SARC	soft_tissue	striated_muscle	sinonasal	NS	rhabdomyosarcoma	embryonal	NS	NS
SARC	soft_tissue	striated_muscle	sinonasal	NS	rhabdomyosarcoma	embryonal	spindle_cell	NS
SARC	soft_tissue	striated_muscle	skin	NS	rhabdomyosarcoma	alveolar	NS	NS
SARC	soft_tissue	striated_muscle	skull	NS	rhabdomyosarcoma	alveolar	NS	NS
SARC	soft_tissue	striated_muscle	spermatic_cord	NS	rhabdomyosarcoma	embryonal	spindle_cell	NS
SARC	soft_tissue	striated_muscle	testis	NS	rhabdomyosarcoma	alveolar	NS	NS
SARC	soft_tissue	striated_muscle	testis	NS	rhabdomyosarcoma	embryonal	NS	NS
SARC	soft_tissue	striated_muscle	testis	NS	rhabdomyosarcoma	embryonal	spindle_cell	NS
SARC	soft_tissue	striated_muscle	testis	NS	rhabdomyosarcoma	NS	NS	NS
SARC	soft_tissue	striated_muscle	testis	NS	rhabdomyosarcoma	pleomorphic	NS	NS
SARC	soft_tissue	striated_muscle	tongue	NS	rhabdomyosarcoma	embryonal	NS	NS
SARC	soft_tissue	striated_muscle	tongue	NS	rhabdomyosarcoma	embryonal	spindle_cell	NS
SARC	soft_tissue	striated_muscle	trunk	NS	rhabdomyosarcoma	alveolar	NS	NS
SARC	soft_tissue	striated_muscle	trunk	NS	rhabdomyosarcoma	embryonal	NS	NS
SARC	soft_tissue	striated_muscle	upper_aerodigestive_tract	NS	rhabdomyosarcoma	embryonal	NS	NS
SARC	soft_tissue	striated_muscle	upper_extremity	NS	rhabdomyosarcoma	alveolar	NS	NS
SARC	soft_tissue	striated_muscle	upper_leg	NS	rhabdomyosarcoma	alveolar	NS	NS
SARC	soft_tissue	striated_muscle	upper_leg	NS	rhabdomyosarcoma	alveolar	solid_variant	NS
SARC	soft_tissue	striated_muscle	upper_leg	NS	rhabdomyosarcoma	embryonal	NS	NS
SARC	soft_tissue	striated_muscle	upper_leg	NS	rhabdomyosarcoma	embryonal	spindle_cell	NS
SARC	soft_tissue	striated_muscle	upper_leg	NS	rhabdomyosarcoma	NS	NS	NS
SARC	soft_tissue	striated_muscle	upper_leg	NS	rhabdomyosarcoma	pleomorphic	NS	NS
SARC	soft_tissue	striated_muscle	upper_leg	NS	rhabdomyosarcoma	sclerosing	NS	NS
SARC	soft_tissue	striated_muscle	uterus	NS	rhabdomyosarcoma	NS	NS	NS
SARC	soft_tissue	striated_muscle	vagina	NS	rhabdomyosarcoma	embryonal	botryoid	NS
SARC	soft_tissue	striated_muscle	vagina	NS	rhabdomyosarcoma	embryonal	NS	NS
SARC	soft_tissue	striated_muscle	vulva	NS	rhabdomyosarcoma	alveolar	NS	NS
SARC	soft_tissue	striated_muscle	vulva	NS	rhabdomyosarcoma	embryonal	spindle_cell	NS
SARC	thymus	NS	NS	NS	thymic_carcinoma	sarcomatoid_carcinoma	NS	NS
SARC	urinary_tract	bladder	NS	NS	carcinoma	sarcomatoid_carcinoma	NS	NS
SARC	vagina	NS	NS	NS	carcinoma	carcinosarcoma-malignant_mesodermal_mixed_tumour	NS	NS
SKCM	skin	abdomen	NS	NS	malignant_melanoma	desmoplastic	NS	NS
SKCM	skin	abdomen	NS	NS	malignant_melanoma	nodular	NS	NS
SKCM	skin	abdomen	NS	NS	malignant_melanoma	NS	NS	NS
SKCM	skin	abdomen	NS	NS	malignant_melanoma	superficial_spreading	NS	NS
SKCM	skin	abdomen	NS	NS	malignant_melanoma	vertical_growth_phase	NS	NS
SKCM	skin	acral	NS	NS	malignant_melanoma	acral_lentiginous	NS	NS
SKCM	skin	acral	NS	NS	malignant_melanoma	nodular	NS	NS
SKCM	skin	acral	NS	NS	malignant_melanoma	NS	NS	NS
SKCM	skin	ankle	NS	NS	malignant_melanoma	acral_lentiginous	NS	NS
SKCM	skin	ankle	NS	NS	malignant_melanoma	desmoplastic	NS	NS
SKCM	skin	ankle	NS	NS	malignant_melanoma	nodular	NS	NS
SKCM	skin	ankle	NS	NS	malignant_melanoma	NS	NS	NS
SKCM	skin	ankle	NS	NS	malignant_melanoma	spitzoid	NS	NS
SKCM	skin	ankle	NS	NS	malignant_melanoma	superficial_spreading	NS	NS
SKCM	skin	anorectal	NS	NS	malignant_melanoma	NS	NS	NS
SKCM	skin	arm	NS	NS	malignant_melanoma	BRAF_inhibitor_related	NS	NS
SKCM	skin	arm	NS	NS	malignant_melanoma	desmoplastic	NS	NS
SKCM	skin	arm	NS	NS	malignant_melanoma	lentigo_maligna	NS	NS
SKCM	skin	arm	NS	NS	malignant_melanoma	nodular	NS	NS
SKCM	skin	arm	NS	NS	malignant_melanoma	NS	NS	NS
SKCM	skin	arm	NS	NS	malignant_melanoma	spitzoid	NS	NS
SKCM	skin	arm	NS	NS	malignant_melanoma	superficial_spreading	NS	NS
SKCM	skin	axilla	NS	NS	malignant_melanoma	NS	NS	NS
SKCM	skin	back	NS	NS	malignant_melanoma	amelanotic	NS	NS
SKCM	skin	back	NS	NS	malignant_melanoma	BRAF_inhibitor_related	NS	NS
SKCM	skin	back	NS	NS	malignant_melanoma	desmoplastic	NS	NS
SKCM	skin	back	NS	NS	malignant_melanoma	in_situ_melanotic_neoplasm	NS	NS
SKCM	skin	back	NS	NS	malignant_melanoma	nodular	NS	NS
SKCM	skin	back	NS	NS	malignant_melanoma	NS	NS	NS
SKCM	skin	back	NS	NS	malignant_melanoma	spitzoid	NS	NS
SKCM	skin	back	NS	NS	malignant_melanoma	superficial_spreading	NS	NS
SKCM	skin	back	NS	NS	malignant_melanoma	vertical_growth_phase	NS	NS
SKCM	skin	breast	NS	NS	malignant_melanoma	NS	NS	NS
SKCM	skin	breast	NS	NS	malignant_melanoma	spitzoid	NS	NS
SKCM	skin	breast	NS	NS	malignant_melanoma	superficial_spreading	NS	NS
SKCM	skin	buttock	NS	NS	malignant_melanoma	desmoplastic	NS	NS
SKCM	skin	buttock	NS	NS	malignant_melanoma	malignant_blue_nevus	NS	NS
SKCM	skin	buttock	NS	NS	malignant_melanoma	nodular	NS	NS
SKCM	skin	buttock	NS	NS	malignant_melanoma	NS	NS	NS
SKCM	skin	buttock	NS	NS	malignant_melanoma	spitzoid	NS	NS
SKCM	skin	buttock	NS	NS	malignant_melanoma	superficial_spreading	NS	NS
SKCM	skin	chest	NS	NS	malignant_melanoma	desmoplastic	NS	NS
SKCM	skin	chest	NS	NS	malignant_melanoma	nodular	NS	NS
SKCM	skin	chest	NS	NS	malignant_melanoma	NS	NS	NS
SKCM	skin	chest	NS	NS	malignant_melanoma	spitzoid	NS	NS
SKCM	skin	chest	NS	NS	malignant_melanoma	superficial_spreading	NS	NS
SKCM	skin	chronically_sun_exposed_site	NS	NS	malignant_melanoma	lentigo_maligna	NS	NS
SKCM	skin	chronically_sun_exposed_site	NS	NS	malignant_melanoma	nodular	NS	NS
SKCM	skin	chronically_sun_exposed_site	NS	NS	malignant_melanoma	NS	NS	NS
SKCM	skin	chronically_sun_exposed_site	NS	NS	malignant_melanoma	superficial_spreading	NS	NS
SKCM	skin	ear	NS	NS	malignant_melanoma	clear_cell	NS	NS
SKCM	skin	ear	NS	NS	malignant_melanoma	desmoplastic	NS	NS
SKCM	skin	ear	NS	NS	malignant_melanoma	lentigo_maligna	NS	NS
SKCM	skin	ear	NS	NS	malignant_melanoma	nodular	NS	NS
SKCM	skin	ear	NS	NS	malignant_melanoma	NS	NS	NS
SKCM	skin	ear	NS	NS	malignant_melanoma	spitzoid	NS	NS
SKCM	skin	ear	NS	NS	malignant_melanoma	superficial_spreading	NS	NS
SKCM	skin	elbow	NS	NS	malignant_melanoma	nodular	NS	NS
SKCM	skin	elbow	NS	NS	malignant_melanoma	NS	NS	NS
SKCM	skin	elbow	NS	NS	malignant_melanoma	spitzoid	NS	NS
SKCM	skin	elbow	NS	NS	malignant_melanoma	superficial_spreading	NS	NS
SKCM	skin	extremity	NS	NS	malignant_melanoma	desmoplastic	NS	NS
SKCM	skin	extremity	NS	NS	malignant_melanoma	malignant_blue_nevus	NS	NS
SKCM	skin	extremity	NS	NS	malignant_melanoma	nodular	NS	NS
SKCM	skin	extremity	NS	NS	malignant_melanoma	NS	NS	NS
SKCM	skin	extremity	NS	NS	malignant_melanoma	superficial_spreading	NS	NS
SKCM	skin	eye	NS	NS	malignant_melanoma	NS	NS	NS
SKCM	skin	face	NS	NS	malignant_melanoma	acral_lentiginous	NS	NS
SKCM	skin	face	NS	NS	malignant_melanoma	BRAF_inhibitor_related	NS	NS
SKCM	skin	face	NS	NS	malignant_melanoma	desmoplastic	NS	NS
SKCM	skin	face	NS	NS	malignant_melanoma	lentigo_maligna	NS	NS
SKCM	skin	face	NS	NS	malignant_melanoma	malignant_blue_nevus	NS	NS
SKCM	skin	face	NS	NS	malignant_melanoma	nodular	NS	NS
SKCM	skin	face	NS	NS	malignant_melanoma	NS	NS	NS
SKCM	skin	face	NS	NS	malignant_melanoma	spitzoid	NS	NS
SKCM	skin	face	NS	NS	malignant_melanoma	superficial_spreading	NS	NS
SKCM	skin	flank	NS	NS	malignant_melanoma	malignant_blue_nevus	NS	NS
SKCM	skin	flank	NS	NS	malignant_melanoma	NS	NS	NS
SKCM	skin	flank	NS	NS	malignant_melanoma	superficial_spreading	NS	NS
SKCM	skin	foot	NS	NS	malignant_melanoma	acral_lentiginous	NS	NS
SKCM	skin	foot	NS	NS	malignant_melanoma	desmoplastic	NS	NS
SKCM	skin	foot	NS	NS	malignant_melanoma	lentigo_maligna	NS	NS
SKCM	skin	foot	NS	NS	malignant_melanoma	nodular	NS	NS
SKCM	skin	foot	NS	NS	malignant_melanoma	NS	NS	NS
SKCM	skin	foot	NS	NS	malignant_melanoma	spitzoid	NS	NS
SKCM	skin	foot	NS	NS	malignant_melanoma	superficial_spreading	NS	NS
SKCM	skin	forearm	NS	NS	malignant_melanoma	desmoplastic	NS	NS
SKCM	skin	forearm	NS	NS	malignant_melanoma	nodular	NS	NS
SKCM	skin	forearm	NS	NS	malignant_melanoma	NS	NS	NS
SKCM	skin	forearm	NS	NS	malignant_melanoma	spitzoid	NS	NS
SKCM	skin	forearm	NS	NS	malignant_melanoma	superficial_spreading	NS	NS
SKCM	skin	genital	NS	NS	malignant_melanoma	nodular	NS	NS
SKCM	skin	groin	NS	NS	malignant_melanoma	NS	NS	NS
SKCM	skin	hand	NS	NS	malignant_melanoma	acral_lentiginous	NS	NS
SKCM	skin	hand	NS	NS	malignant_melanoma	desmoplastic	NS	NS
SKCM	skin	hand	NS	NS	malignant_melanoma	nodular	NS	NS
SKCM	skin	hand	NS	NS	malignant_melanoma	NS	NS	NS
SKCM	skin	hand	NS	NS	malignant_melanoma	spitzoid	NS	NS
SKCM	skin	hand	NS	NS	malignant_melanoma	superficial_spreading	NS	NS
SKCM	skin	head_neck	NS	NS	malignant_melanoma	desmoplastic	NS	NS
SKCM	skin	head_neck	NS	NS	malignant_melanoma	in_situ_melanotic_neoplasm	NS	NS
SKCM	skin	head_neck	NS	NS	malignant_melanoma	lentigo_maligna	NS	NS
SKCM	skin	head_neck	NS	NS	malignant_melanoma	nodular	NS	NS
SKCM	skin	head_neck	NS	NS	malignant_melanoma	NS	NS	NS
SKCM	skin	head_neck	NS	NS	malignant_melanoma	superficial_spreading	NS	NS
SKCM	skin	hip	NS	NS	malignant_melanoma	desmoplastic	NS	NS
SKCM	skin	hip	NS	NS	malignant_melanoma	NS	NS	NS
SKCM	skin	hip	NS	NS	malignant_melanoma	spitzoid	NS	NS
SKCM	skin	intermittently_sun_exposed_site	NS	NS	malignant_melanoma	nodular	NS	NS
SKCM	skin	intermittently_sun_exposed_site	NS	NS	malignant_melanoma	NS	NS	NS
SKCM	skin	intermittently_sun_exposed_site	NS	NS	malignant_melanoma	superficial_spreading	NS	NS
SKCM	skin	knee	NS	NS	malignant_melanoma	nodular	NS	NS
SKCM	skin	knee	NS	NS	malignant_melanoma	NS	NS	NS
SKCM	skin	knee	NS	NS	malignant_melanoma	spitzoid	NS	NS
SKCM	skin	knee	NS	NS	malignant_melanoma	superficial_spreading	NS	NS
SKCM	skin	labia_major	NS	NS	malignant_melanoma	NS	NS	NS
SKCM	skin	labia	NS	NS	malignant_melanoma	NS	NS	NS
SKCM	skin	leg	NS	NS	malignant_melanoma	acral_lentiginous	NS	NS
SKCM	skin	leg	NS	NS	malignant_melanoma	desmoplastic	NS	NS
SKCM	skin	leg	NS	NS	malignant_melanoma	lentigo_maligna	NS	NS
SKCM	skin	leg	NS	NS	malignant_melanoma	nodular	NS	NS
SKCM	skin	leg	NS	NS	malignant_melanoma	NS	NS	NS
SKCM	skin	leg	NS	NS	malignant_melanoma	spitzoid	NS	NS
SKCM	skin	leg	NS	NS	malignant_melanoma	superficial_spreading	NS	NS
SKCM	skin	lip	NS	NS	malignant_melanoma	desmoplastic	NS	NS
SKCM	skin	lower_back	NS	NS	malignant_melanoma	desmoplastic	NS	NS
SKCM	skin	lower_back	NS	NS	malignant_melanoma	NS	NS	NS
SKCM	skin	lower_back	NS	NS	malignant_melanoma	superficial_spreading	NS	NS
SKCM	skin	lower_extremity	NS	NS	malignant_melanoma	acral_lentiginous	NS	NS
SKCM	skin	lower_extremity	NS	NS	malignant_melanoma	amelanotic	NS	NS
SKCM	skin	lower_extremity	NS	NS	malignant_melanoma	nodular	NS	NS
SKCM	skin	lower_extremity	NS	NS	malignant_melanoma	NS	NS	NS
SKCM	skin	lower_extremity	NS	NS	malignant_melanoma	superficial_spreading	NS	NS
SKCM	skin	lower_leg	NS	NS	malignant_melanoma	desmoplastic	NS	NS
SKCM	skin	lower_leg	NS	NS	malignant_melanoma	in_situ_melanotic_neoplasm	NS	NS
SKCM	skin	lower_leg	NS	NS	malignant_melanoma	nodular	NS	NS
SKCM	skin	lower_leg	NS	NS	malignant_melanoma	NS	NS	NS
SKCM	skin	lower_leg	NS	NS	malignant_melanoma	spitzoid	NS	NS
SKCM	skin	lower_leg	NS	NS	malignant_melanoma	superficial_spreading	NS	NS
SKCM	skin	mucosal	NS	NS	malignant_melanoma	acral_lentiginous	NS	NS
SKCM	skin	mucosal	NS	NS	malignant_melanoma	desmoplastic	NS	NS
SKCM	skin	mucosal	NS	NS	malignant_melanoma	mucosal_lentiginous	NS	NS
SKCM	skin	mucosal	NS	NS	malignant_melanoma	nodular	NS	NS
SKCM	skin	mucosal	NS	NS	malignant_melanoma	NS	NS	NS
SKCM	skin	mucosal	NS	NS	malignant_melanoma	rhabdoid	NS	NS
SKCM	skin	mucosal	NS	NS	malignant_melanoma	superficial_spreading	NS	NS
SKCM	skin	neck	NS	NS	malignant_melanoma	desmoplastic	NS	NS
SKCM	skin	neck	NS	NS	malignant_melanoma	lentigo_maligna	NS	NS
SKCM	skin	neck	NS	NS	malignant_melanoma	nodular	NS	NS
SKCM	skin	neck	NS	NS	malignant_melanoma	NS	NS	NS
SKCM	skin	neck	NS	NS	malignant_melanoma	spitzoid	NS	NS
SKCM	skin	neck	NS	NS	malignant_melanoma	superficial_spreading	NS	NS
SKCM	skin	nipple	NS	NS	malignant_melanoma	NS	NS	NS
SKCM	skin	non_chronically_sun_exposed_site	NS	NS	malignant_melanoma	NS	NS	NS
SKCM	skin	NS	NS	NS	malignant_melanoma	acral_lentiginous	NS	NS
SKCM	skin	NS	NS	NS	malignant_melanoma	amelanotic	NS	NS
SKCM	skin	NS	NS	NS	malignant_melanoma	desmoplastic	NS	NS
SKCM	skin	NS	NS	NS	malignant_melanoma	in_situ_melanotic_neoplasm	NS	NS
SKCM	skin	NS	NS	NS	malignant_melanoma	lentigo_maligna	NS	NS
SKCM	skin	NS	NS	NS	malignant_melanoma	malignant_blue_nevus	NS	NS
SKCM	skin	NS	NS	NS	malignant_melanoma	mucosal_lentiginous	NS	NS
SKCM	skin	NS	NS	NS	malignant_melanoma	nevoid	NS	NS
SKCM	skin	NS	NS	NS	malignant_melanoma	nodular	NS	NS
SKCM	skin	NS	NS	NS	malignant_melanoma	NS	NS	NS
SKCM	skin	NS	NS	NS	malignant_melanoma	radial_growth_phase	NS	NS
SKCM	skin	NS	NS	NS	malignant_melanoma	spindle	NS	NS
SKCM	skin	NS	NS	NS	malignant_melanoma	spitzoid	NS	NS
SKCM	skin	NS	NS	NS	malignant_melanoma	superficial_spreading_BRAF_inhibitor_related	NS	NS
SKCM	skin	NS	NS	NS	malignant_melanoma	superficial_spreading	NS	NS
SKCM	skin	NS	NS	NS	malignant_melanoma	vertical_growth_phase	NS	NS
SKCM	skin	ovary	NS	NS	malignant_melanoma	NS	NS	NS
SKCM	skin	penis	NS	NS	malignant_melanoma	nodular	NS	NS
SKCM	skin	penis	NS	NS	malignant_melanoma	superficial_spreading	NS	NS
SKCM	skin	pubis	NS	NS	malignant_melanoma	superficial_spreading	NS	NS
SKCM	skin	scalp	NS	NS	malignant_melanoma	BRAF_inhibitor_related	NS	NS
SKCM	skin	scalp	NS	NS	malignant_melanoma	desmoplastic	NS	NS
SKCM	skin	scalp	NS	NS	malignant_melanoma	lentigo_maligna	NS	NS
SKCM	skin	scalp	NS	NS	malignant_melanoma	malignant_blue_nevus	NS	NS
SKCM	skin	scalp	NS	NS	malignant_melanoma	nodular	NS	NS
SKCM	skin	scalp	NS	NS	malignant_melanoma	NS	NS	NS
SKCM	skin	scalp	NS	NS	malignant_melanoma	spitzoid	NS	NS
SKCM	skin	scalp	NS	NS	malignant_melanoma	superficial_spreading	NS	NS
SKCM	skin	scalp	NS	NS	malignant_melanoma	vertical_growth_phase	NS	NS
SKCM	skin	shoulder	NS	NS	malignant_melanoma	BRAF_inhibitor_related	NS	NS
SKCM	skin	shoulder	NS	NS	malignant_melanoma	desmoplastic	NS	NS
SKCM	skin	shoulder	NS	NS	malignant_melanoma	lentigo_maligna	NS	NS
SKCM	skin	shoulder	NS	NS	malignant_melanoma	malignant_blue_nevus	NS	NS
SKCM	skin	shoulder	NS	NS	malignant_melanoma	nodular	NS	NS
SKCM	skin	shoulder	NS	NS	malignant_melanoma	NS	NS	NS
SKCM	skin	shoulder	NS	NS	malignant_melanoma	spitzoid	NS	NS
SKCM	skin	shoulder	NS	NS	malignant_melanoma	superficial_spreading_BRAF_inhibitor_related	NS	NS
SKCM	skin	shoulder	NS	NS	malignant_melanoma	superficial_spreading	NS	NS
SKCM	skin	sole	NS	NS	malignant_melanoma	acral_lentiginous	NS	NS
SKCM	skin	sole	NS	NS	malignant_melanoma	nodular	NS	NS
SKCM	skin	sole	NS	NS	malignant_melanoma	NS	NS	NS
SKCM	skin	sole	NS	NS	malignant_melanoma	superficial_spreading	NS	NS
SKCM	skin	subungual	NS	NS	malignant_melanoma	acral_lentiginous	NS	NS
SKCM	skin	subungual	NS	NS	malignant_melanoma	NS	NS	NS
SKCM	skin	subungual	NS	NS	malignant_melanoma	vertical_growth_phase	NS	NS
SKCM	skin	sun_exposed_site	NS	NS	malignant_melanoma	NS	NS	NS
SKCM	skin	sun_unexposed_site	NS	NS	malignant_melanoma	mucosal_lentiginous	NS	NS
SKCM	skin	sun_unexposed_site	NS	NS	malignant_melanoma	nodular	NS	NS
SKCM	skin	sun_unexposed_site	NS	NS	malignant_melanoma	NS	NS	NS
SKCM	skin	sun_unexposed_site	NS	NS	malignant_melanoma	superficial_spreading	NS	NS
SKCM	skin	trunk	NS	NS	malignant_melanoma	desmoplastic	NS	NS
SKCM	skin	trunk	NS	NS	malignant_melanoma	nodular	NS	NS
SKCM	skin	trunk	NS	NS	malignant_melanoma	NS	NS	NS
SKCM	skin	trunk	NS	NS	malignant_melanoma	superficial_spreading	NS	NS
SKCM	skin	upper_arm	NS	NS	malignant_melanoma	BRAF_inhibitor_related	NS	NS
SKCM	skin	upper_arm	NS	NS	malignant_melanoma	desmoplastic	NS	NS
SKCM	skin	upper_arm	NS	NS	malignant_melanoma	lentigo_maligna	NS	NS
SKCM	skin	upper_arm	NS	NS	malignant_melanoma	nodular	NS	NS
SKCM	skin	upper_arm	NS	NS	malignant_melanoma	NS	NS	NS
SKCM	skin	upper_arm	NS	NS	malignant_melanoma	spitzoid	NS	NS
SKCM	skin	upper_arm	NS	NS	malignant_melanoma	superficial_spreading	NS	NS
SKCM	skin	upper_back	NS	NS	malignant_melanoma	desmoplastic	NS	NS
SKCM	skin	upper_back	NS	NS	malignant_melanoma	lentigo_maligna	NS	NS
SKCM	skin	upper_back	NS	NS	malignant_melanoma	NS	NS	NS
SKCM	skin	upper_back	NS	NS	malignant_melanoma	superficial_spreading	NS	NS
SKCM	skin	upper_extremity	NS	NS	malignant_melanoma	nodular	NS	NS
SKCM	skin	upper_extremity	NS	NS	malignant_melanoma	NS	NS	NS
SKCM	skin	upper_extremity	NS	NS	malignant_melanoma	superficial_spreading	NS	NS
SKCM	skin	upper_leg	NS	NS	malignant_melanoma	BRAF_inhibitor_related	NS	NS
SKCM	skin	upper_leg	NS	NS	malignant_melanoma	desmoplastic	NS	NS
SKCM	skin	upper_leg	NS	NS	malignant_melanoma	in_situ_melanotic_neoplasm	NS	NS
SKCM	skin	upper_leg	NS	NS	malignant_melanoma	nodular	NS	NS
SKCM	skin	upper_leg	NS	NS	malignant_melanoma	NS	NS	NS
SKCM	skin	upper_leg	NS	NS	malignant_melanoma	spitzoid	NS	NS
SKCM	skin	upper_leg	NS	NS	malignant_melanoma	superficial_spreading	NS	NS
SKCM	skin	vulva	NS	NS	malignant_melanoma	acral_lentiginous	NS	NS
SKCM	skin	vulva	NS	NS	malignant_melanoma	mucosal_lentiginous	NS	NS
SKCM	skin	vulva	NS	NS	malignant_melanoma	nodular	NS	NS
SKCM	skin	vulva	NS	NS	malignant_melanoma	NS	NS	NS
SKCM	skin	vulva	NS	NS	malignant_melanoma	superficial_spreading	NS	NS
STAD	stomach	gastroesophageal_junction	NS	NS	carcinoma	adenocarcinoma	NS	NS
STAD	stomach	gastroesophageal_junction	NS	NS	carcinoma	diffuse_adenocarcinoma	NS	NS
STAD	stomach	gastroesophageal_junction	NS	NS	carcinoma	intestinal_adenocarcinoma	NS	NS
STAD	stomach	NS	NS	NS	carcinoma	adenocarcinoma	NS	NS
STAD	stomach	NS	NS	NS	carcinoma	adenocarcinoma	rhabdoid	NS
STAD	stomach	NS	NS	NS	carcinoma	adenocarcinoma-unclassifiable	NS	NS
STAD	stomach	NS	NS	NS	carcinoma	diffuse_adenocarcinoma	NS	NS
STAD	stomach	NS	NS	NS	carcinoma	foveolar_adenocarcinoma	NS	NS
STAD	stomach	NS	NS	NS	carcinoma	fundic_gland_type_adenocarcinoma	NS	NS
STAD	stomach	NS	NS	NS	carcinoma	gastric_type_adenocarcinoma	NS	NS
STAD	stomach	NS	NS	NS	carcinoma	intestinal_adenocarcinoma	NS	NS
STAD	stomach	NS	NS	NS	carcinoma	mixed_intestinal_and_diffuse_adenocarcinoma-unclassifiable	NS	NS
STAD	stomach	NS	NS	NS	carcinoma	mucinous_adenocarcinoma	NS	NS
STAD	stomach	NS	NS	NS	carcinoma	papillary_adenocarcinoma	NS	NS
STAD	stomach	NS	NS	NS	carcinoma	signet_ring_adenocarcinoma	NS	NS
STAD	stomach	NS	NS	NS	carcinoma	small_cell_adenocarcinoma	NS	NS
STAD	stomach	NS	NS	NS	carcinoma	tubular_adenocarcinoma	NS	NS
STAD	stomach	NS	NS	NS	carcinoma	undifferentiated_adenocarcinoma	NS	NS
TGCT	testis	NS	NS	NS	germ_cell_tumour	choriocarcinoma	NS	NS
TGCT	testis	NS	NS	NS	germ_cell_tumour	embryonal_carcinoma	NS	NS
TGCT	testis	NS	NS	NS	germ_cell_tumour	mixed	NS	NS
TGCT	testis	NS	NS	NS	germ_cell_tumour	mixed	teratocarcinoma	NS
TGCT	testis	NS	NS	NS	germ_cell_tumour	non_seminoma	NS	NS
TGCT	testis	NS	NS	NS	germ_cell_tumour	NS	NS	NS
TGCT	testis	NS	NS	NS	germ_cell_tumour	seminoma	NS	NS
TGCT	testis	NS	NS	NS	germ_cell_tumour	seminoma	spermatocytic	NS
TGCT	testis	NS	NS	NS	germ_cell_tumour	teratoma	NS	NS
TGCT	testis	NS	NS	NS	germ_cell_tumour	teratoma_with_malignant_transformation	NS	NS
TGCT	testis	NS	NS	NS	germ_cell_tumour	yolk_sac_tumour	NS	NS
THCA	thyroid	NS	NS	NS	carcinoma	anaplastic_carcinoma	NS	NS
THCA	thyroid	NS	NS	NS	carcinoma	follicular_carcinoma	NS	NS
THCA	thyroid	NS	NS	NS	carcinoma	Hurthle_cell_carcinoma	NS	NS
THCA	thyroid	NS	NS	NS	carcinoma	insular_carcinoma	NS	NS
THCA	thyroid	NS	NS	NS	carcinoma	medullary_carcinoma	NS	NS
THCA	thyroid	NS	NS	NS	carcinoma	mixed_medullary_and_follicular_carcinoma	NS	NS
THCA	thyroid	NS	NS	NS	carcinoma	mixed_papillary_and_follicular_carcinoma	NS	NS
THCA	thyroid	NS	NS	NS	carcinoma	mucoepidermoid_carcinoma	NS	NS
THCA	thyroid	NS	NS	NS	carcinoma	neuroendocrine_carcinoma	NS	NS
THCA	thyroid	NS	NS	NS	carcinoma	NS	NS	NS
THCA	thyroid	NS	NS	NS	carcinoma	papillary_carcinoma	arising_in_struma_ovarii	NS
THCA	thyroid	NS	NS	NS	carcinoma	papillary_carcinoma	follicular_variant	NS
THCA	thyroid	NS	NS	NS	carcinoma	papillary_carcinoma	hyalinizing_trabecular_variant	NS
THCA	thyroid	NS	NS	NS	carcinoma	papillary_carcinoma	mixed_variant	NS
THCA	thyroid	NS	NS	NS	carcinoma	papillary_carcinoma	NS	NS
THCA	thyroid	NS	NS	NS	carcinoma	papillary_carcinoma	solid_variant	NS
THCA	thyroid	NS	NS	NS	carcinoma	squamous_cell_carcinoma	NS	NS
THYM	Thymoma	NS	NS	NS	thymoma	cortical	NS	NS
THYM	thymus	NS	NS	NS	thymoma	epithelial_predominant	NS	NS
THYM	thymus	NS	NS	NS	thymoma	lymphocyte_predominant	NS	NS
THYM	thymus	NS	NS	NS	thymoma	mixed_lymphoepithelial	NS	NS
THYM	thymus	NS	NS	NS	thymoma	NS	NS	NS
THYM	thymus	NS	NS	NS	thymoma	spindle	NS	NS
UCEC	endometrium	NS	NS	NS	carcinoma	endometrioid_carcinoma	NS	NS
UCEC	endometrium	NS	NS	NS	carcinoma	mixed_serous_and_endometrioid_carcinoma	NS	NS
UCS	endometrium	NS	NS	NS	carcinoma	carcinosarcoma-malignant_mesodermal_mixed_tumour	NS	NS
UVM	eye	uveal_tract	NS	NS	malignant_melanoma	epithelioid	NS	NS
	eye	uveal_tract	NS	NS	malignant_melanoma	mixed	NS	NS
	eye	uveal_tract	NS	NS	malignant_melanoma	NS	NS	NS
	eye	uveal_tract	NS	NS	malignant_melanoma	spindle	AB	NS
	eye	uveal_tract	NS	NS	malignant_melanoma	spindle	B	NS
	eye	uveal_tract	NS	NS	malignant_melanoma	spindle	NS	NS
